# Supplementary material for: Design, Synthesis, Molecular Modeling, and Biological Evaluation of Novel Pyrimidine Derivatives as Potential Calcium Channel Blockers
Source: MDPI journal article supplement (doi:10.3390/molecules28124869), 2023-06-20

## **Supplementary Material**

### **Table of Contents**

**$^1\text{H}$  NMR and  $^{13}\text{C}$  NMR spectra copies**



Ethyl 4-(1H-indol-3-yl)-6-methyl-2-thioxo-1,2,3,4-tetrahydropyrimidine-5-carboxylate **4a**

DN DMSO D:\ abar

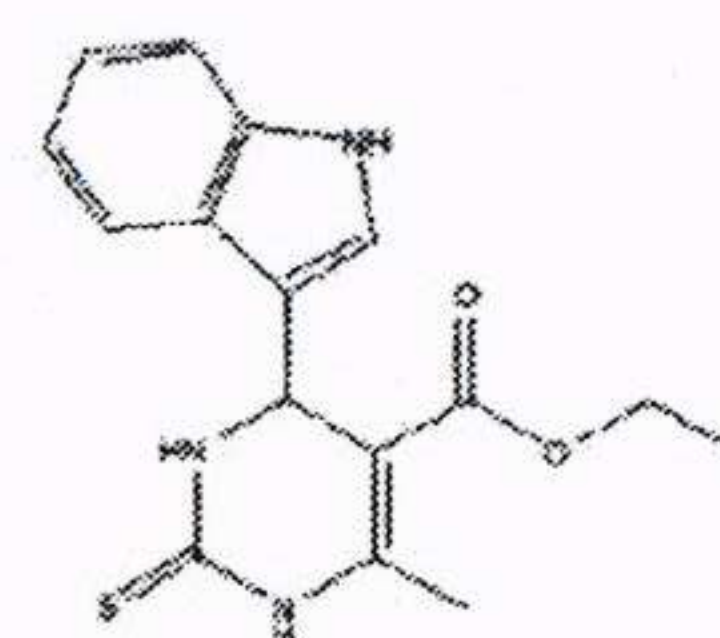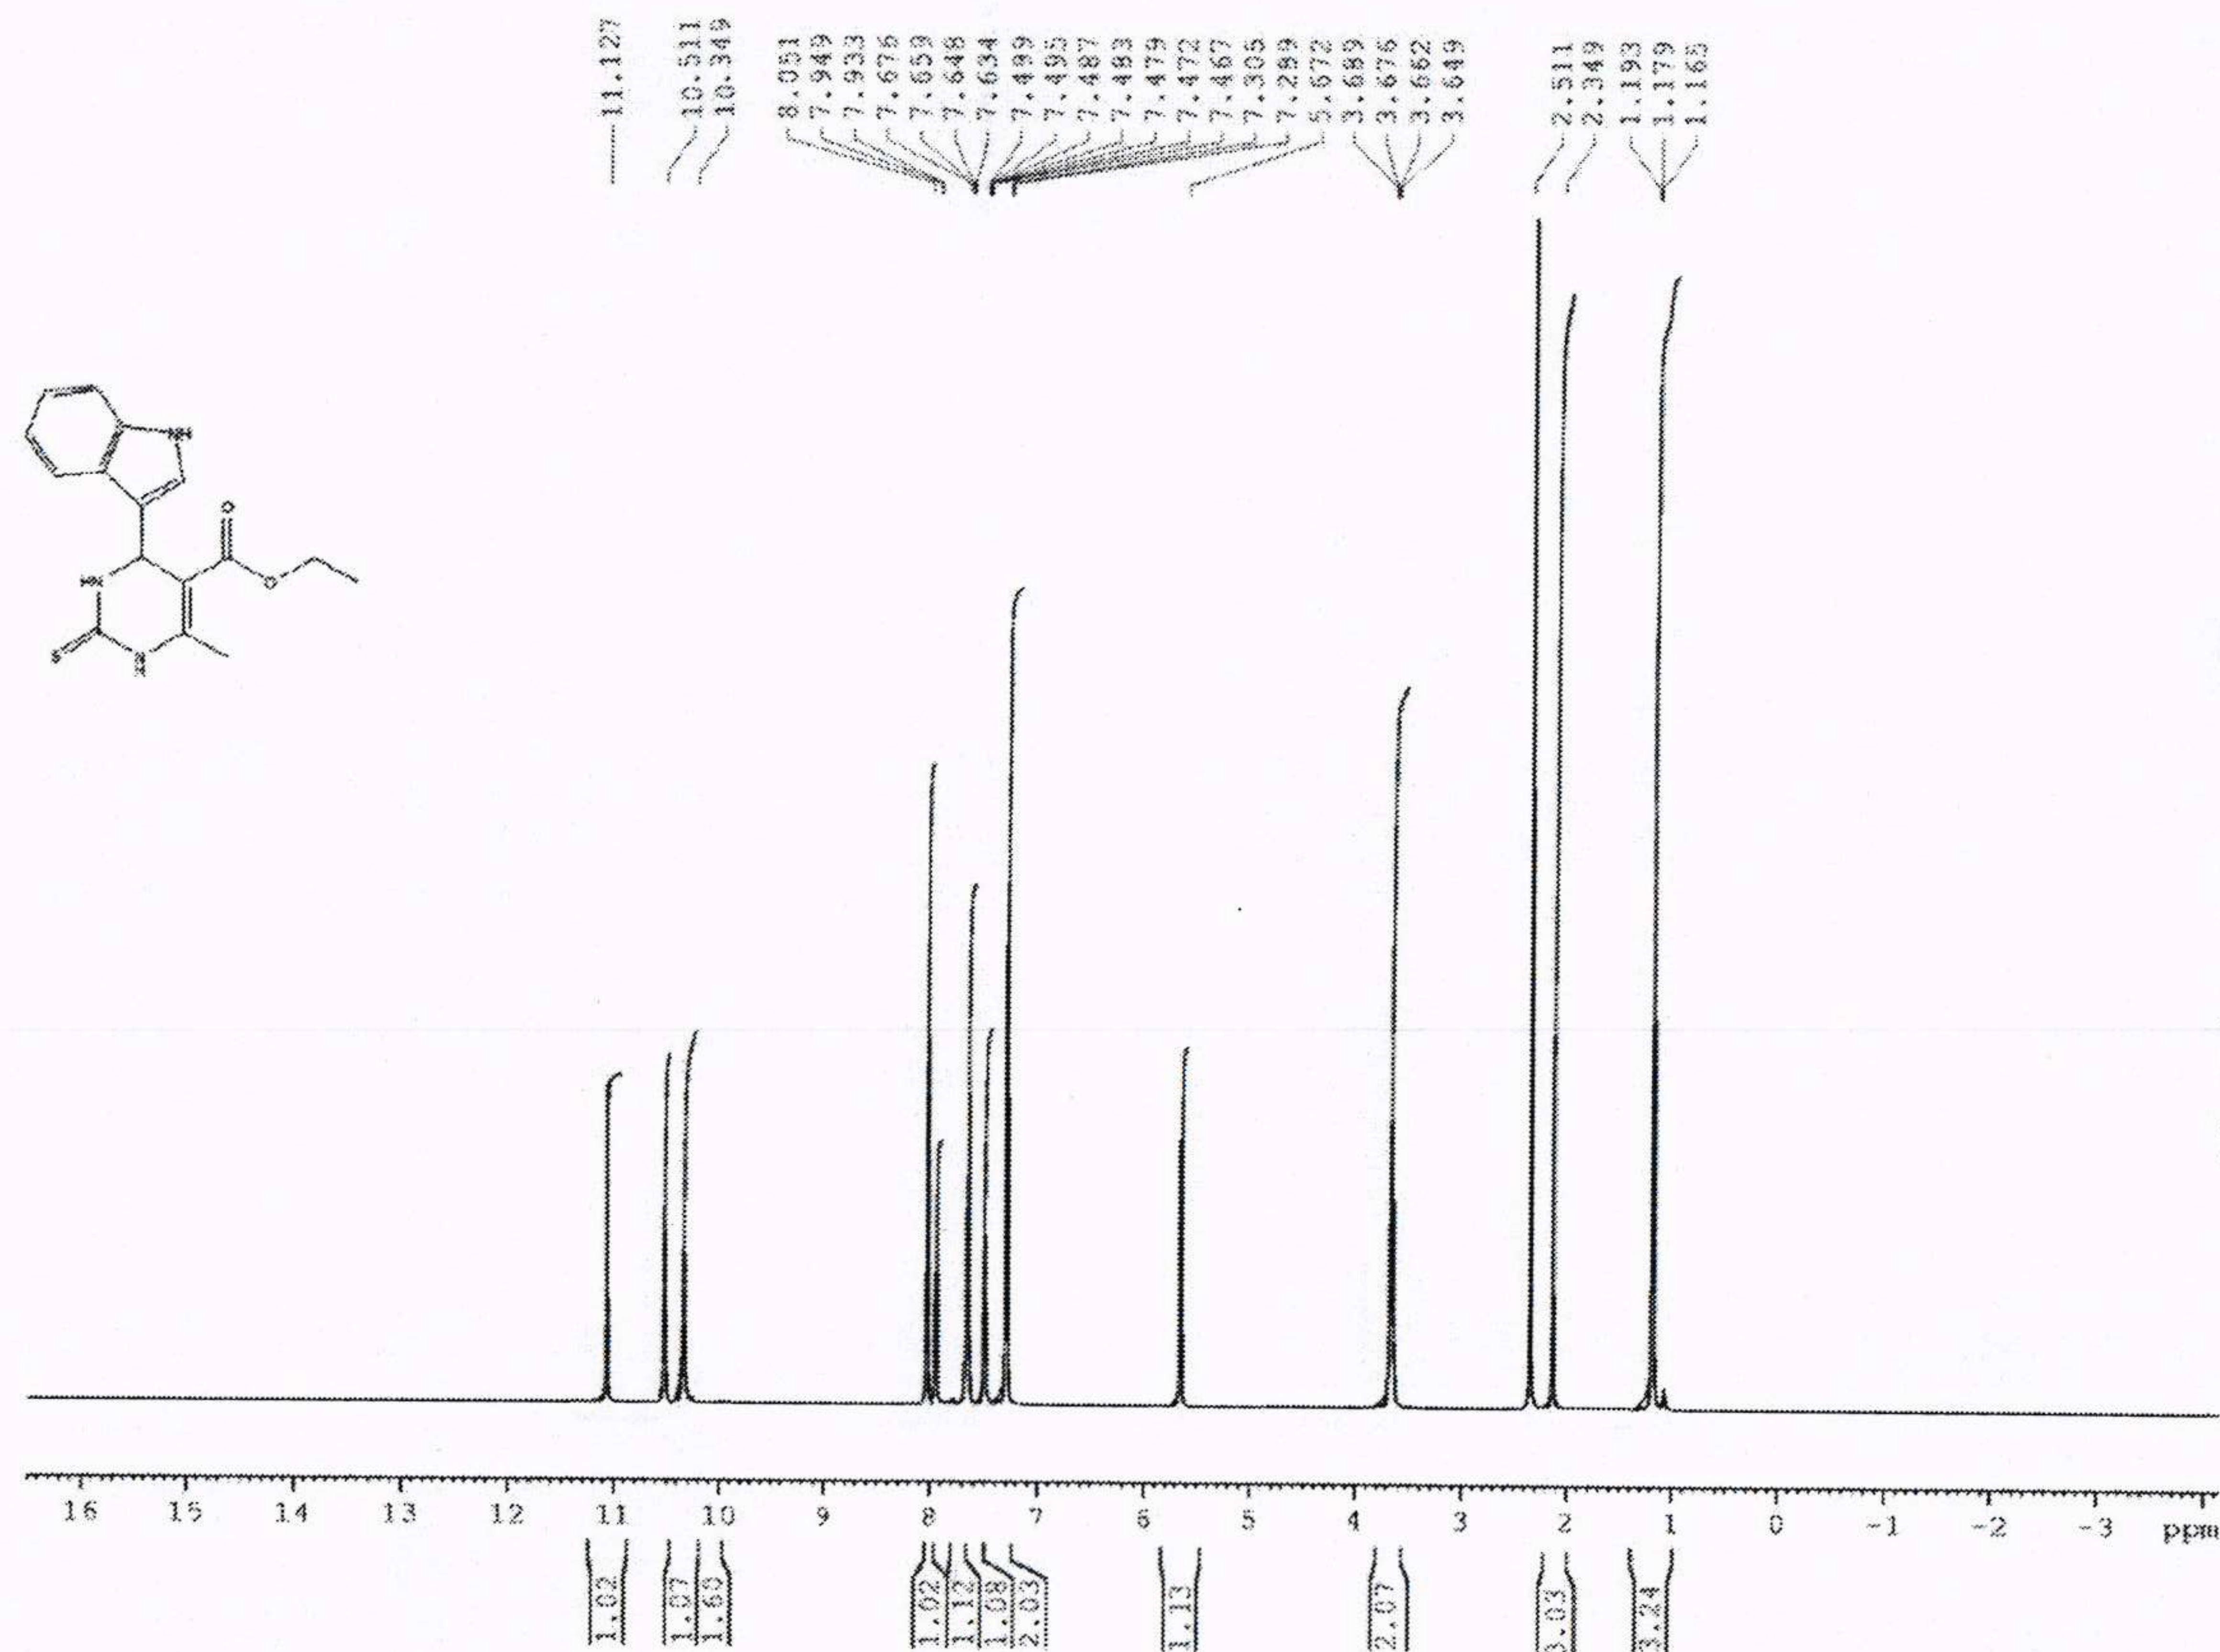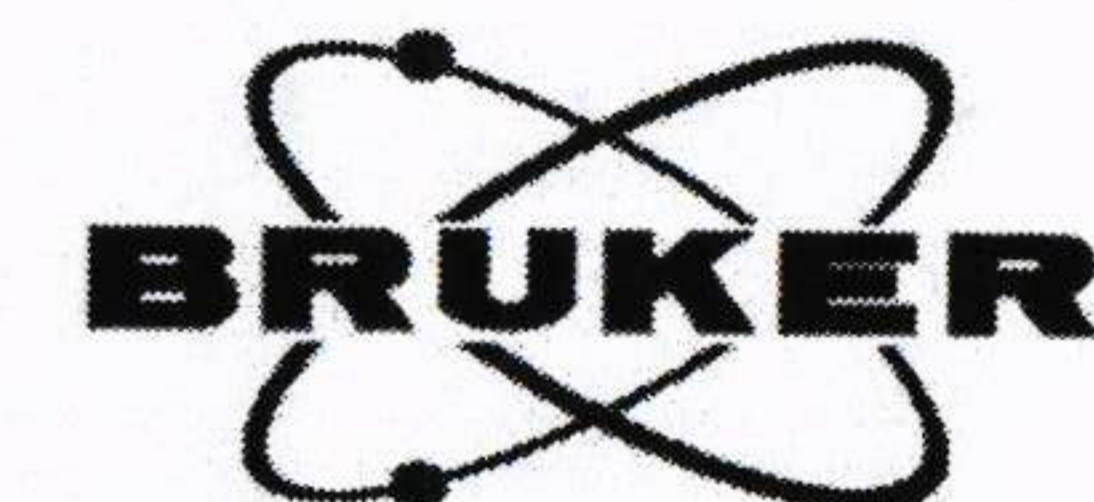

NAME drshahat-2  
EXPNO 10  
PROCNO 1  
Date\_ 20210624  
Time 12.45  
INSTRUM spect  
PROBHD 5 mm PABBO BB-  
PULPROG zg30  
TD 65536  
SOLVENT DMSO  
NS 16  
DS 2  
SWH 10330.578 Hz  
FIDRES 0.157632 Hz  
AQ 3.1720407 sec  
RG 35.9  
DW 48.400 usec  
DE 6.50 usec  
TE 298.3 K  
D1 1.00000000 sec  
TD0 1

===== CHANNEL f1 =====  
NUC1 1H  
P1 14.70 usec  
PL1 -1.10 dB  
SFO1 500.1330885 MHz  
SI 32768  
SF 500.1300000 MHz  
WDW EM  
SSB 0  
LB 0.30 Hz  
GB 0  
PC 1.00

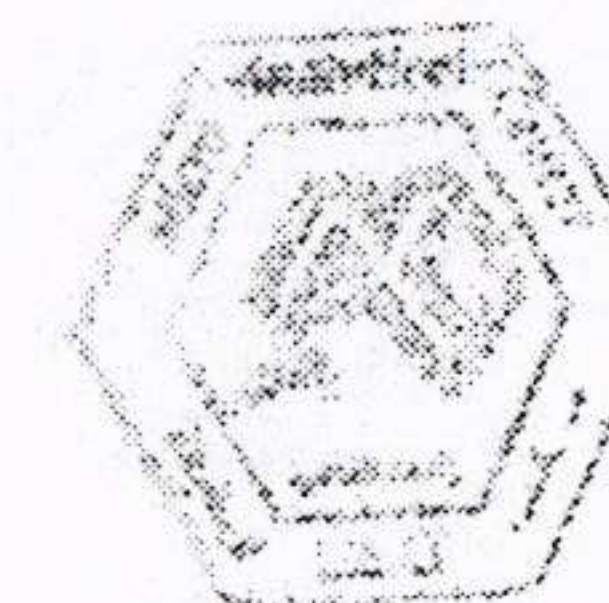



C13CPD32 DMSO D:\ abari 46

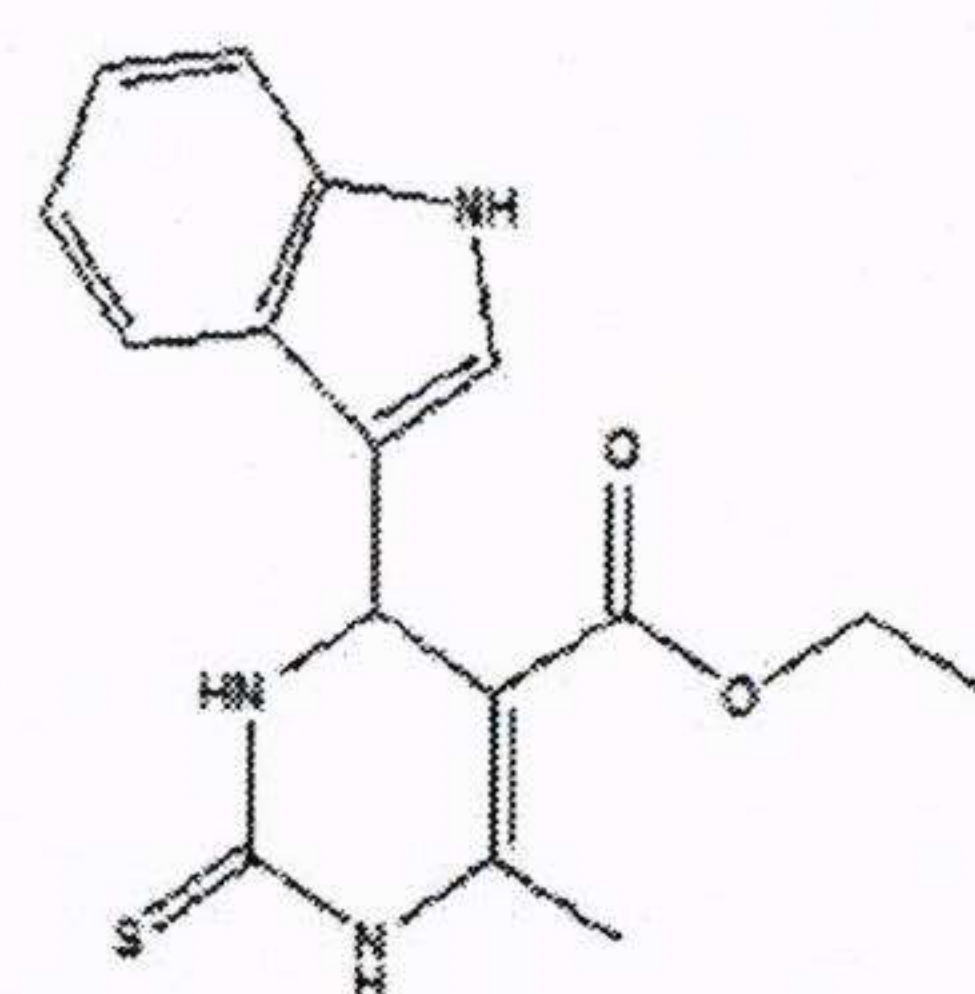

4a

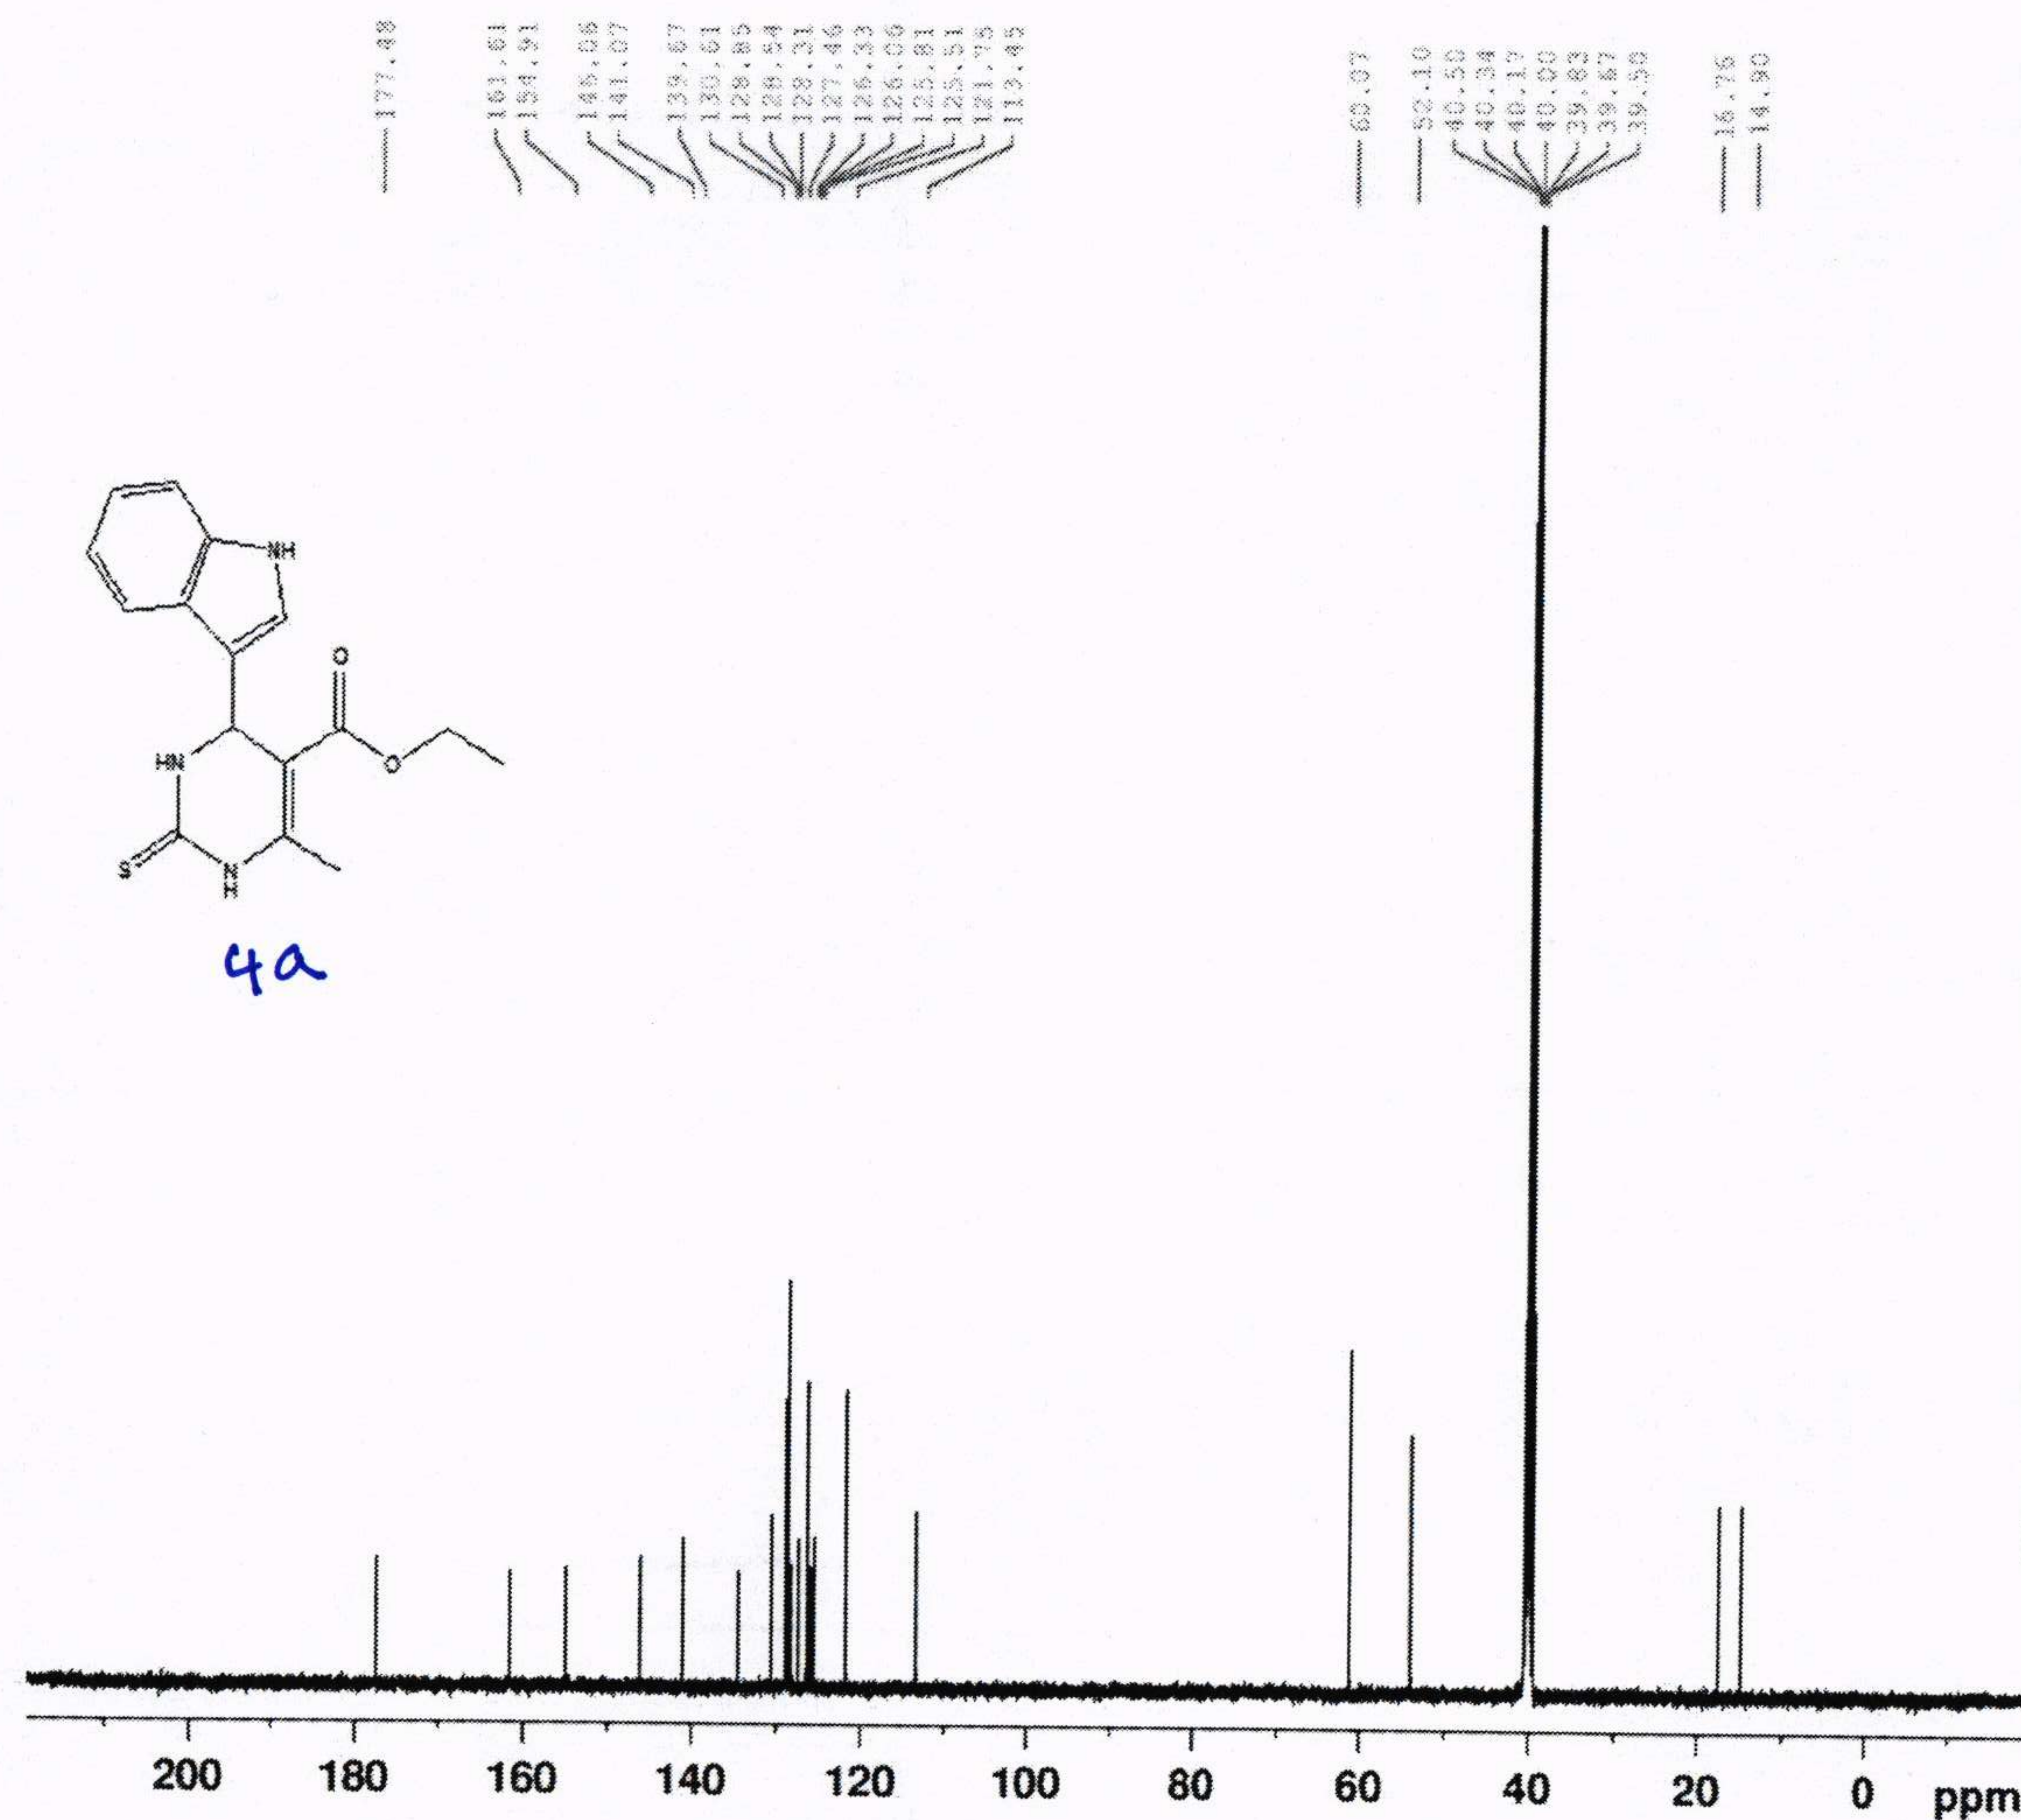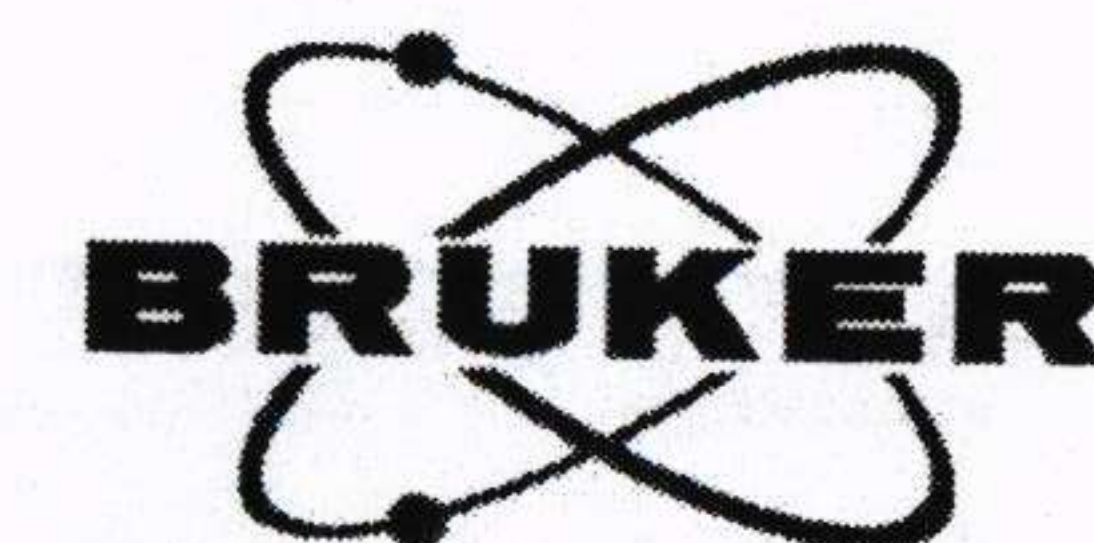

NAME drshahat-2  
EXPNO 11  
PROCNO 1  
Date\_ 20210624  
Time 20.47  
INSTRUM spect  
PROBHD 5 mm PABBO BB-  
PULPROG zgpg30  
TD 65536  
SOLVENT DMSO  
NS 2000  
DS 2  
SWH 30030.029 Hz  
FIDRES 0.458222 Hz  
AQ 1.0912410 sec  
RG 14596.5  
DW 16.650 usec  
DE 6.50 usec  
TE 299.1 K  
D1 2.00000000 sec  
D11 0.03000000 sec  
TD0 1

===== CHANNEL f1 =====  
NUC1 13C  
P1 20.00 usec  
PL1 -6.00 dB  
SFO1 125.7703643 MHz

===== CHANNEL f2 =====  
CPDPRG2 waltz16  
NUC2 1H  
PCPD2 80.00 usec  
PL2 -1.10 dB  
PL12 13.44 dB  
PL13 16.40 dB  
SFO2 500.1320005 MHz  
SI 32768  
SF 125.7577890 MHz  
WDW EM  
SSB 0  
LB 1.00 Hz  
GB 0  
PC 1.40

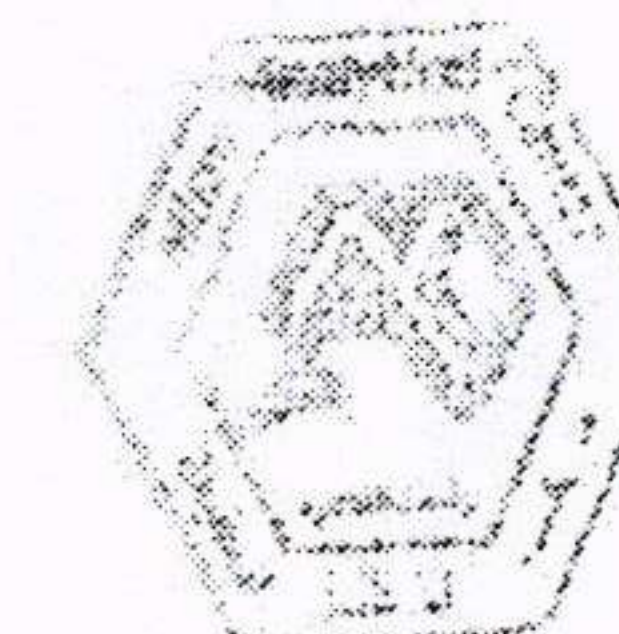



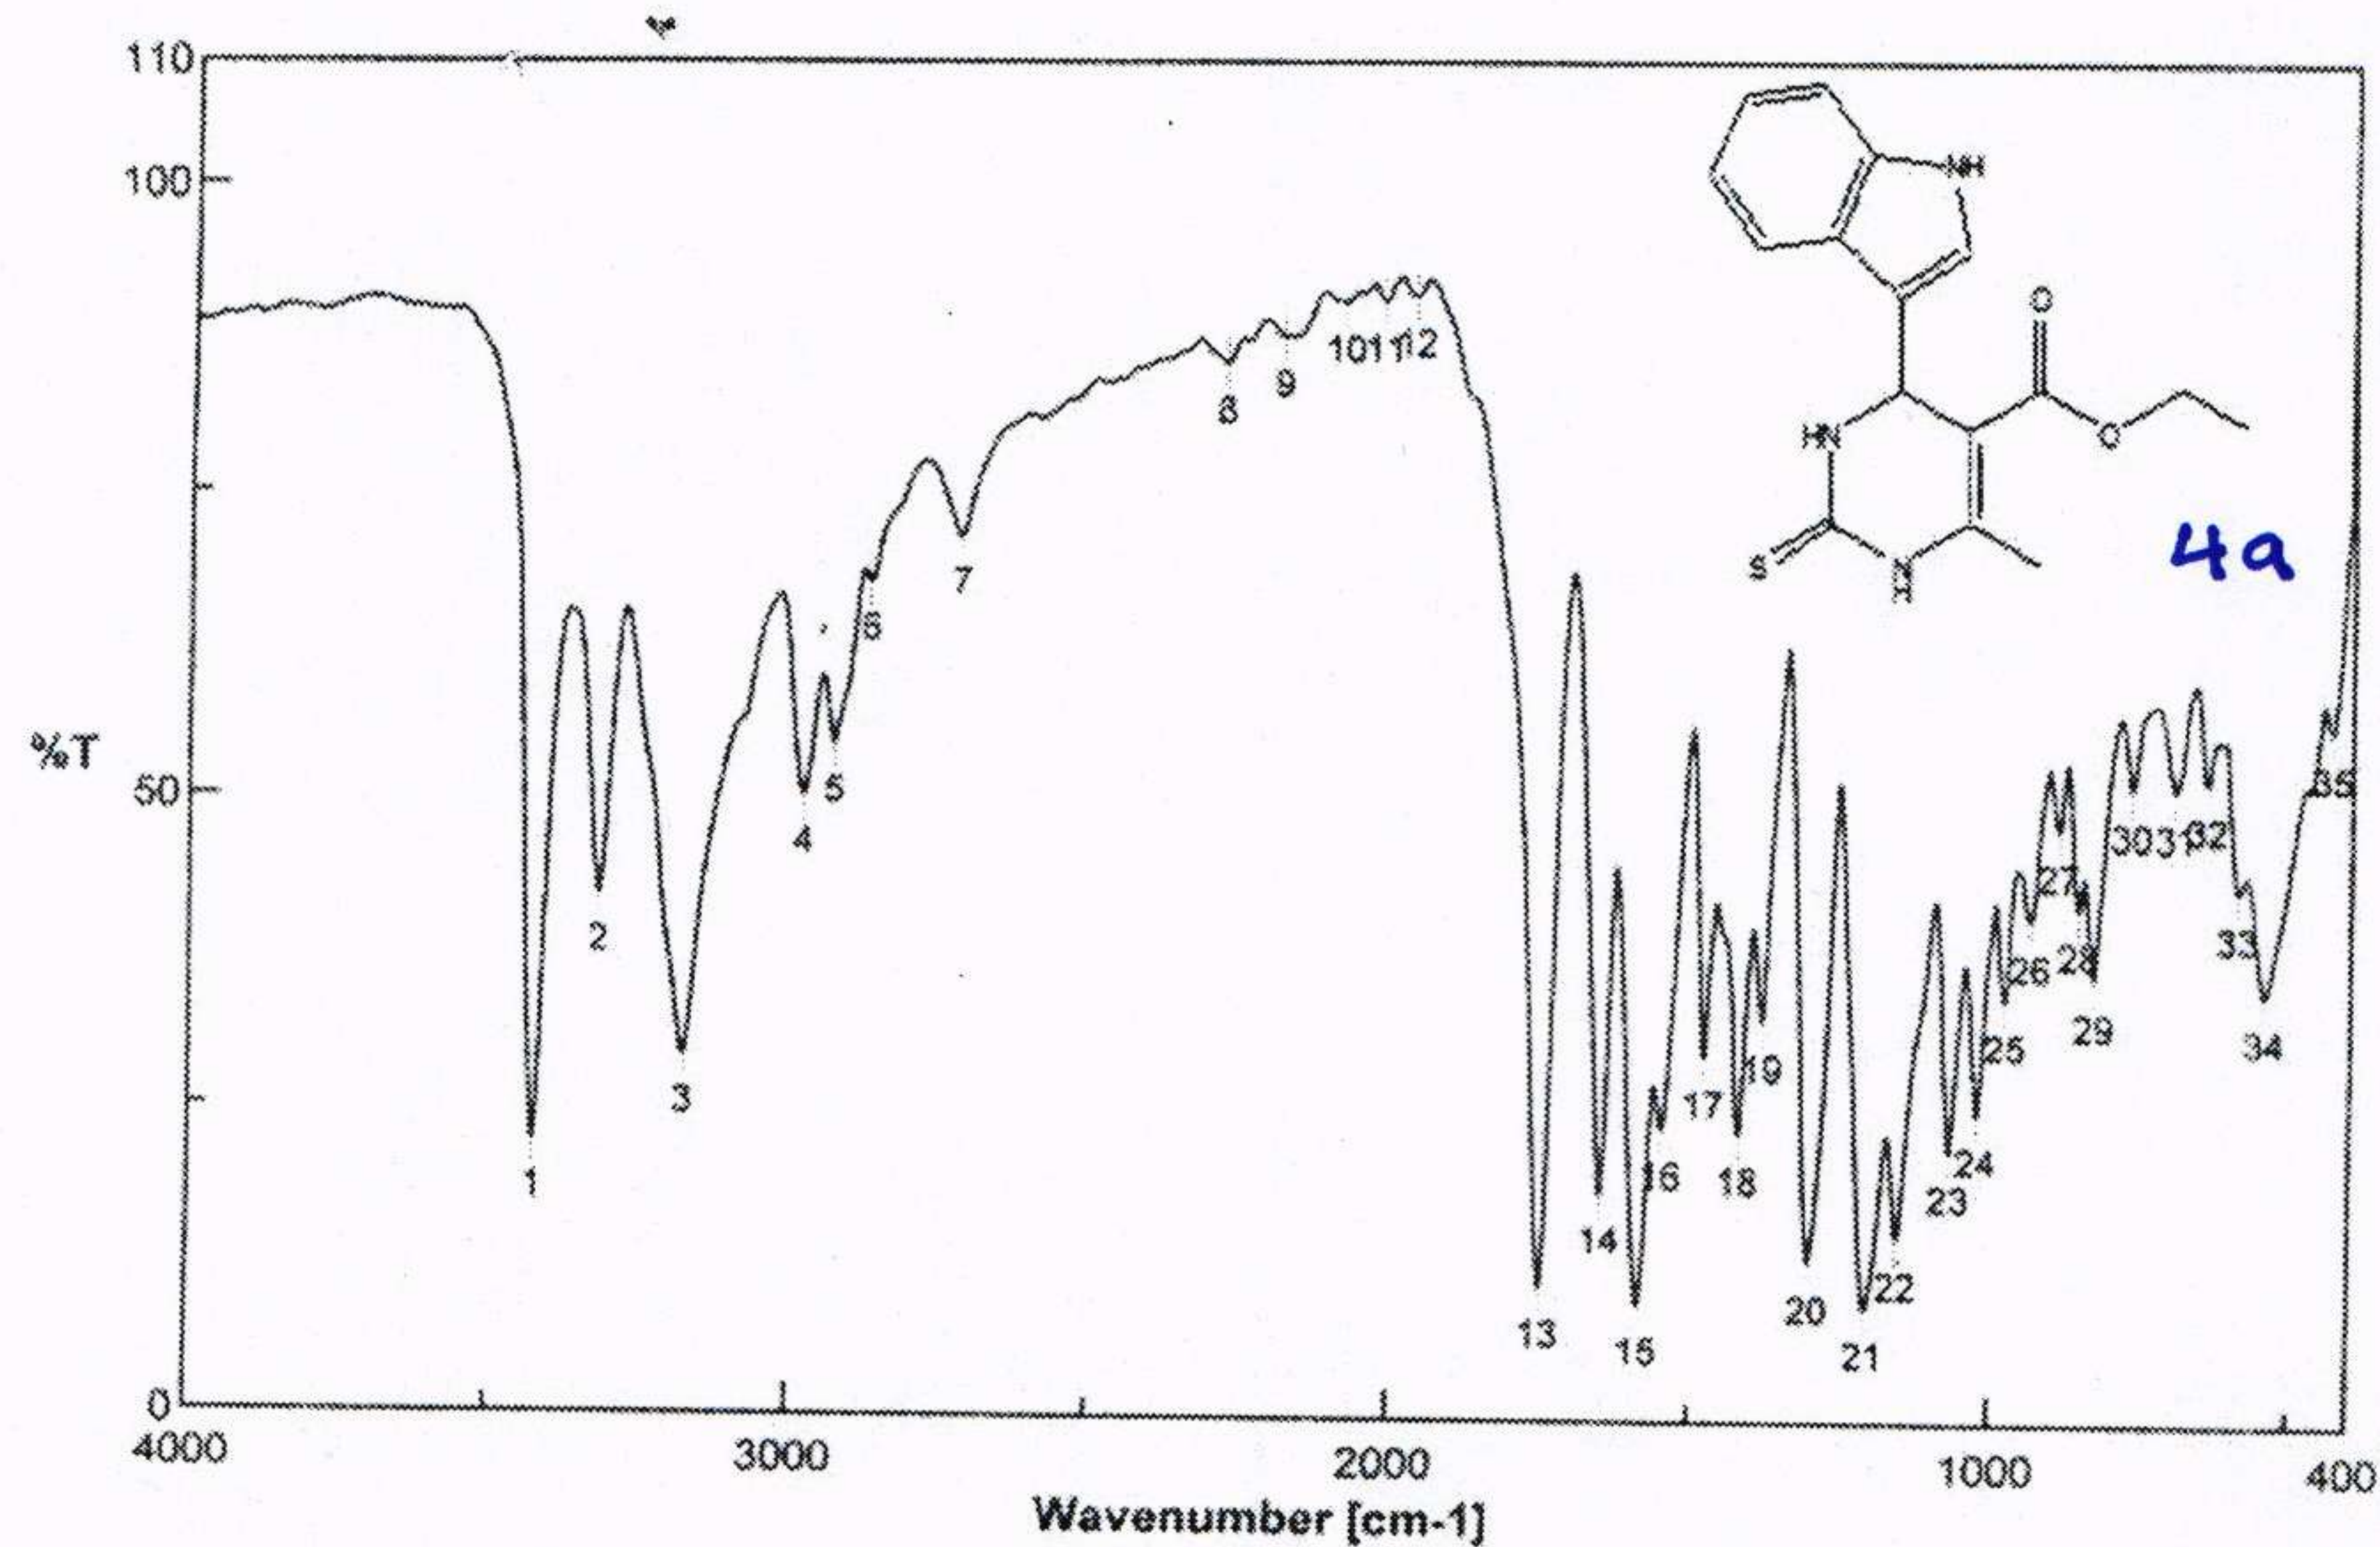

Accumulation 16  
 Resolution 4 cm-1  
 Zero Filling ON  
 Apodization Cosine  
 Gain Auto (4)  
 Scanning Speed Auto (2 mm/sec)  
 Date/Time 15/06/21 8:44  
 Update 15/06/21 8:45  
 Operator  
 File Name Memory#27  
 Sample Name 1  
 Comment

| No. | cm-1    | %T      | No. | cm-1    | %T      | No. | cm-1    | %T      |
|-----|---------|---------|-----|---------|---------|-----|---------|---------|
| 1   | 3425.92 | 22.2424 | 2   | 3319.86 | 42.1963 | 3   | 3178.11 | 29.2658 |
| 4   | 2980.45 | 50.2125 | 5   | 2930.31 | 54.382  | 6   | 2872.45 | 67.6564 |
| 7   | 2723    | 71.4615 | 8   | 2285.23 | 85.5904 | 9   | 2188.81 | 87.8301 |
| 10  | 2090.46 | 90.6215 | 11  | 2023.93 | 90.6816 | 12  | 1971.86 | 91.0892 |
| 13  | 1749.12 | 10.9233 | 14  | 1650.77 | 18.535  | 15  | 1586.16 | 9.60047 |
| 16  | 1549.52 | 23.6982 | 17  | 1480.1  | 29.5846 | 18  | 1422.24 | 23.3596 |
| 19  | 1383.68 | 32.5285 | 20  | 1302.68 | 13.0578 | 21  | 1207.22 | 9.40387 |
| 22  | 1155.15 | 14.9925 | 23  | 1070.3  | 21.991  | 24  | 1024.98 | 25.0683 |
| 25  | 978.697 | 34.4013 | 26  | 937.235 | 40.6767 | 27  | 891.916 | 47.9657 |
| 28  | 858.168 | 41.6919 | 29  | 831.169 | 35.9772 | 30  | 771.387 | 51.2849 |
| 31  | 698.105 | 51.1864 | 32  | 644.108 | 51.7501 | 33  | 592.039 | 43.0424 |
| 34  | 545.756 | 34.8429 | 35  | 434.869 | 55.9967 |     |         |         |

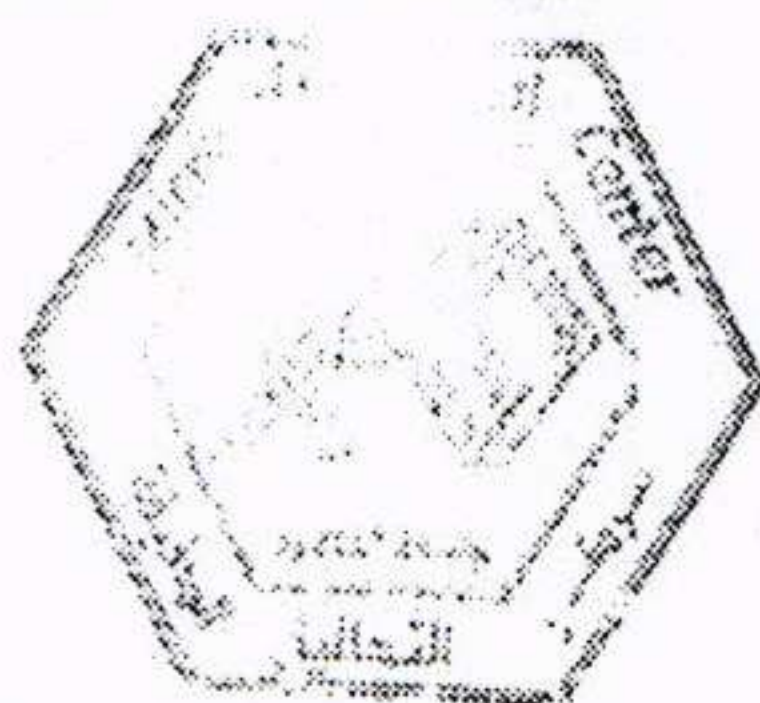



**Cairo University  
Micro Analytical Center**

**DI Analysis  
Shimadzu Qp-2010 Plus**

Sample Information  
Analyzed by : Mai Younis  
Analyzed : 22/06/2021 02:44:23  
Sample Name : 2  
Sample ID :  
Customer Name : Dr. Moh F  
Data File : C:\GCMSolution\Data\Project1\21.QGD  
Org Data File : C:\GCMSolution\Data\Project1\21.QGD  
Method File : C:\GCMSolution\Data\Project1\Mai.qgm  
Org Method File : C:\GCMSolution\Data\Project1\Mai.qgm  
Report File :  
Tuning File : C:\GCMSolution\System1\Tune1\_default1.qgt  
SendIfModified by : Mai Younis  
Modified : 22/06/2021 02:49:22

Method  
Analytical Line 1  
IonSourceTemp : 250.00 °C  
[MS Table]  
--Group 1 - Event 1--  
Start Time : 0.00min  
End Time : 10.00min  
ACQ Mode : Scan  
Event Time : 0.50sec  
Scan Speed : 1000  
Start m/z : 50.00  
End m/z : 500.00  
  
Electron Voltage : 70 eV  
Ionization Mode : EI

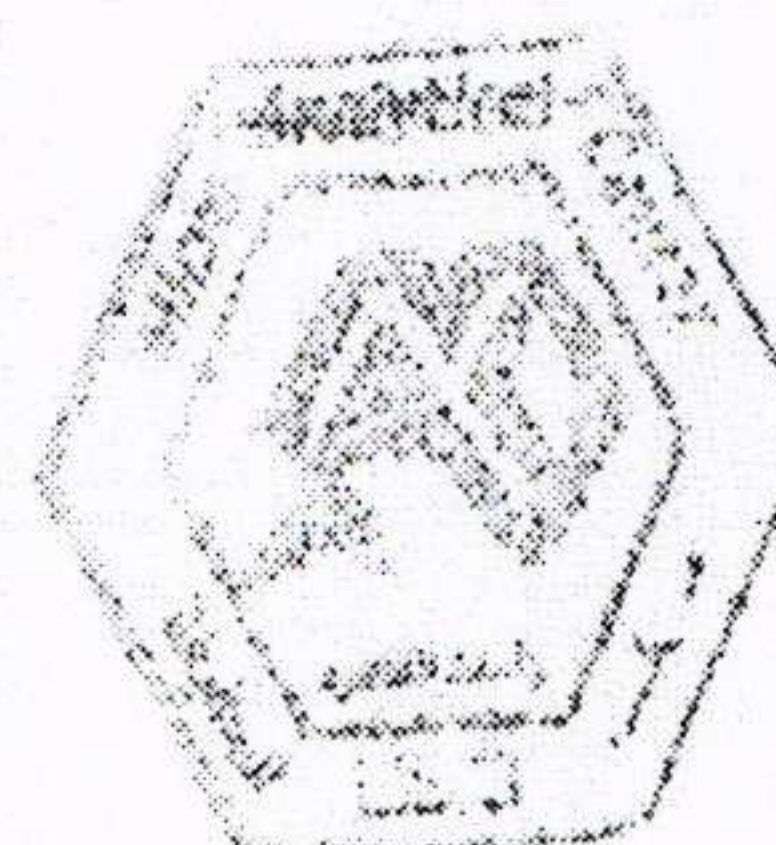

C:\GCMSolution\Data\Project1\21.QGD

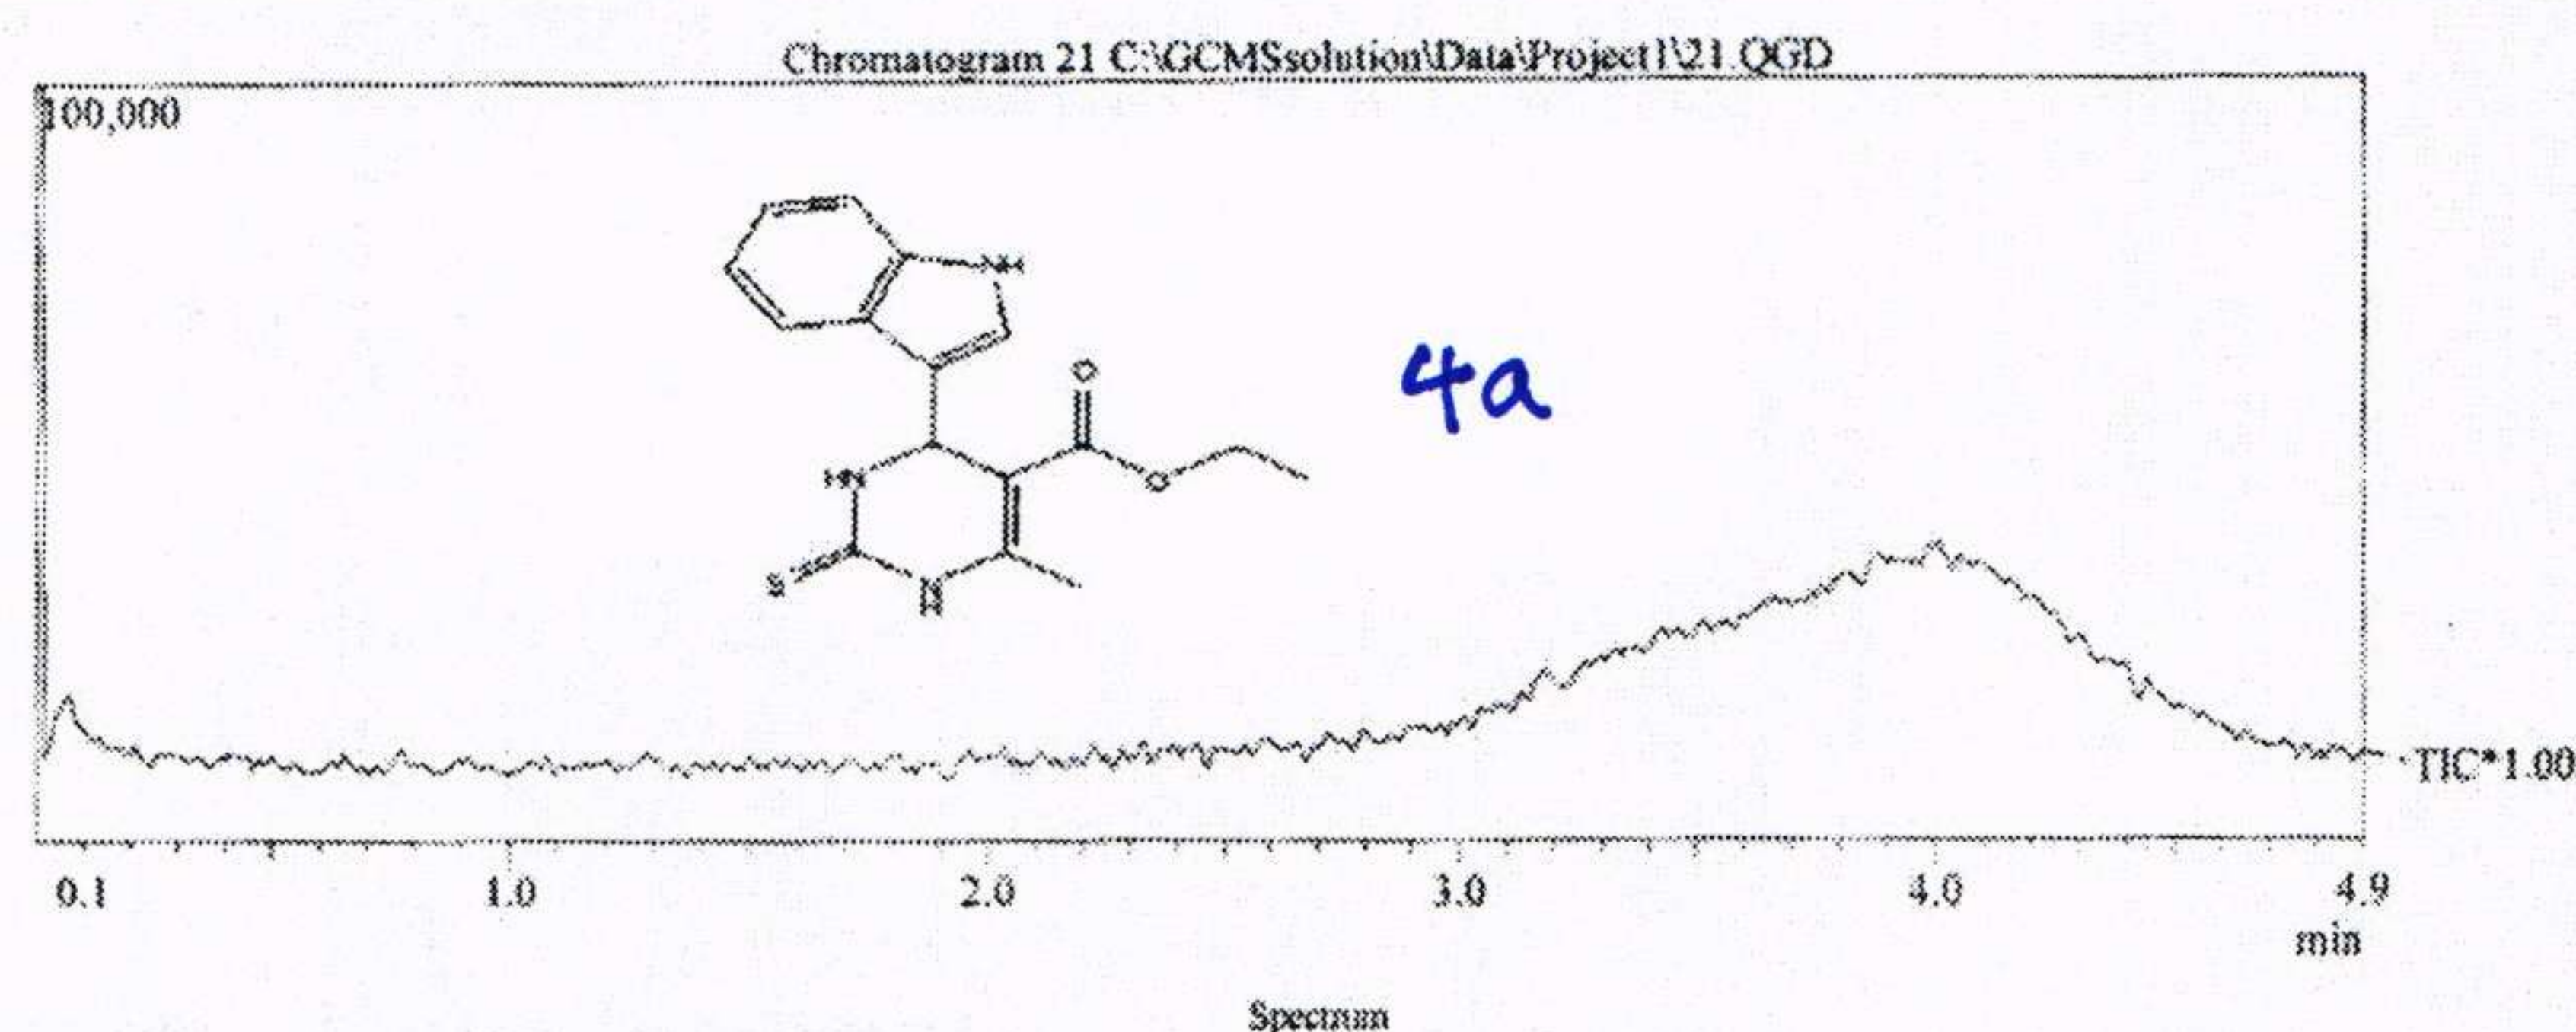

Line#:1 R.Time:3.1(Scan#:370)  
MassPeaks: 315  
RawMode:Single 3.1(370) BasePeak: 73(537)  
BG Mode:None Group 1 - Event 1

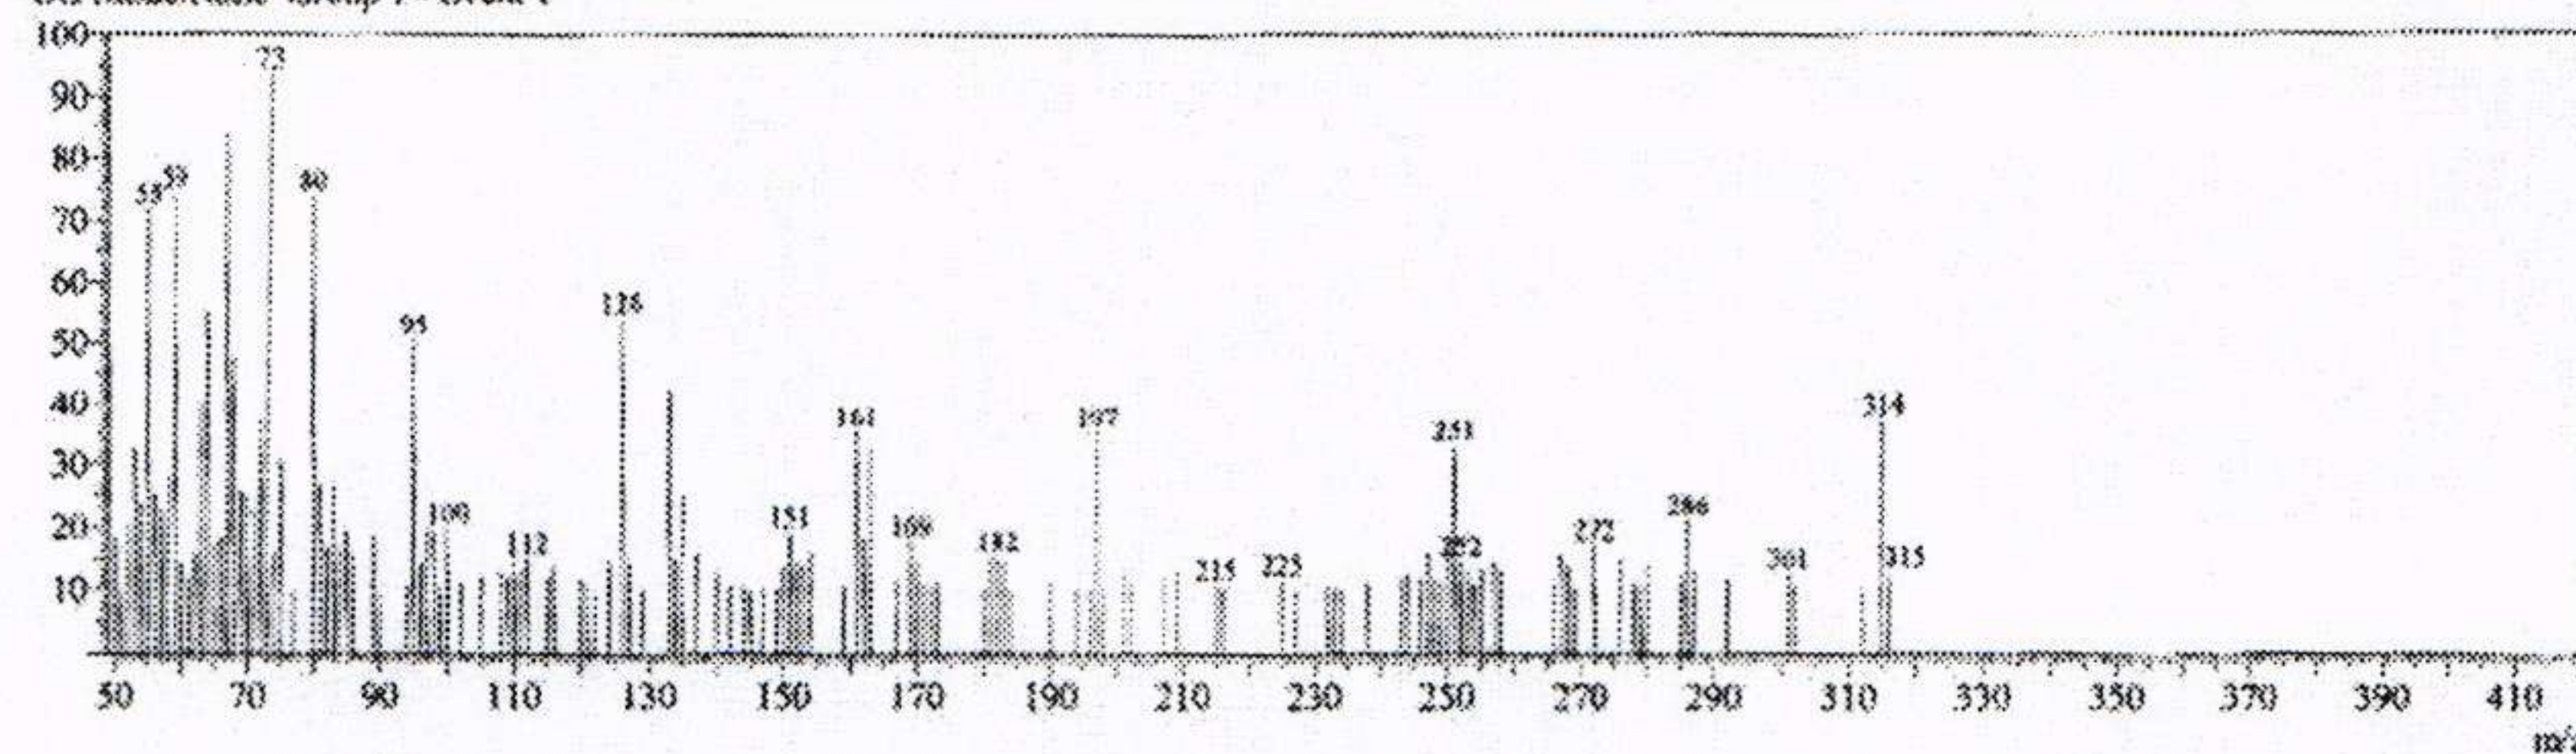

Mass Table  
Line#:1 R.Time:3.1(Scan#:370)  
MassPeaks: 315  
RawMode:Single 3.1(370) BasePeak:73(537)  
BG Mode:None Group 1 - Event 1

| # | m/z   | Abs. In | Rel. Int. | # | m/z   | Abs. In | Rel. Int. | # | m/z   | Abs. In | Rel. Int. |
|---|-------|---------|-----------|---|-------|---------|-----------|---|-------|---------|-----------|
| 1 | 50.00 | 97      | 18.06     | 4 | 53.00 | 177     | 32.96     | 7 | 56.00 | 135     | 25.14     |
| 2 | 51.00 | 52      | 9.68      | 5 | 54.00 | 127     | 23.65     | 8 | 57.00 | 122     | 22.72     |
| 3 | 52.00 | 110     | 20.48     | 6 | 55.00 | 386     | 71.88     | 9 | 58.00 | 154     | 28.68     |



Ethyl 4-(2-chloroquinolin-3-yl)-6-methyl-2-thioxo-1,2,3,4-tetrahydropyrimidine-5-carboxylate 4b

DN DMSO D:\ abar

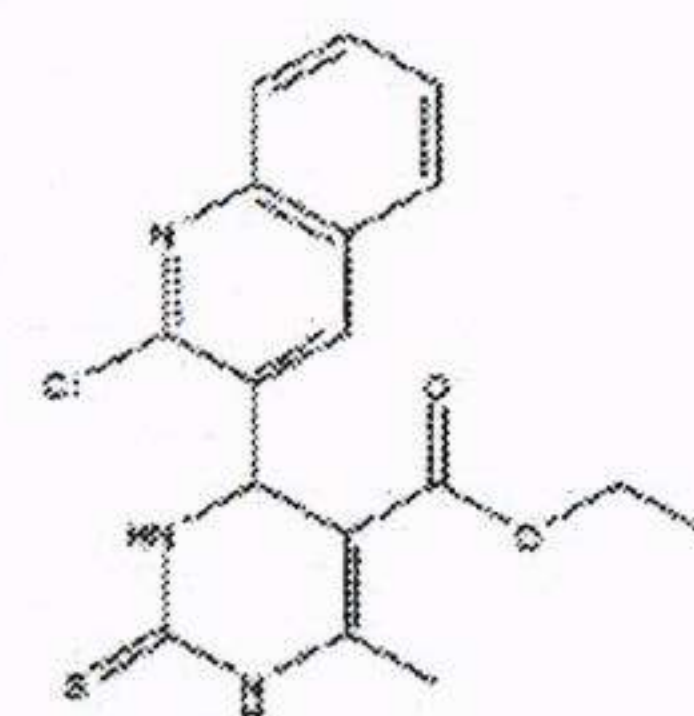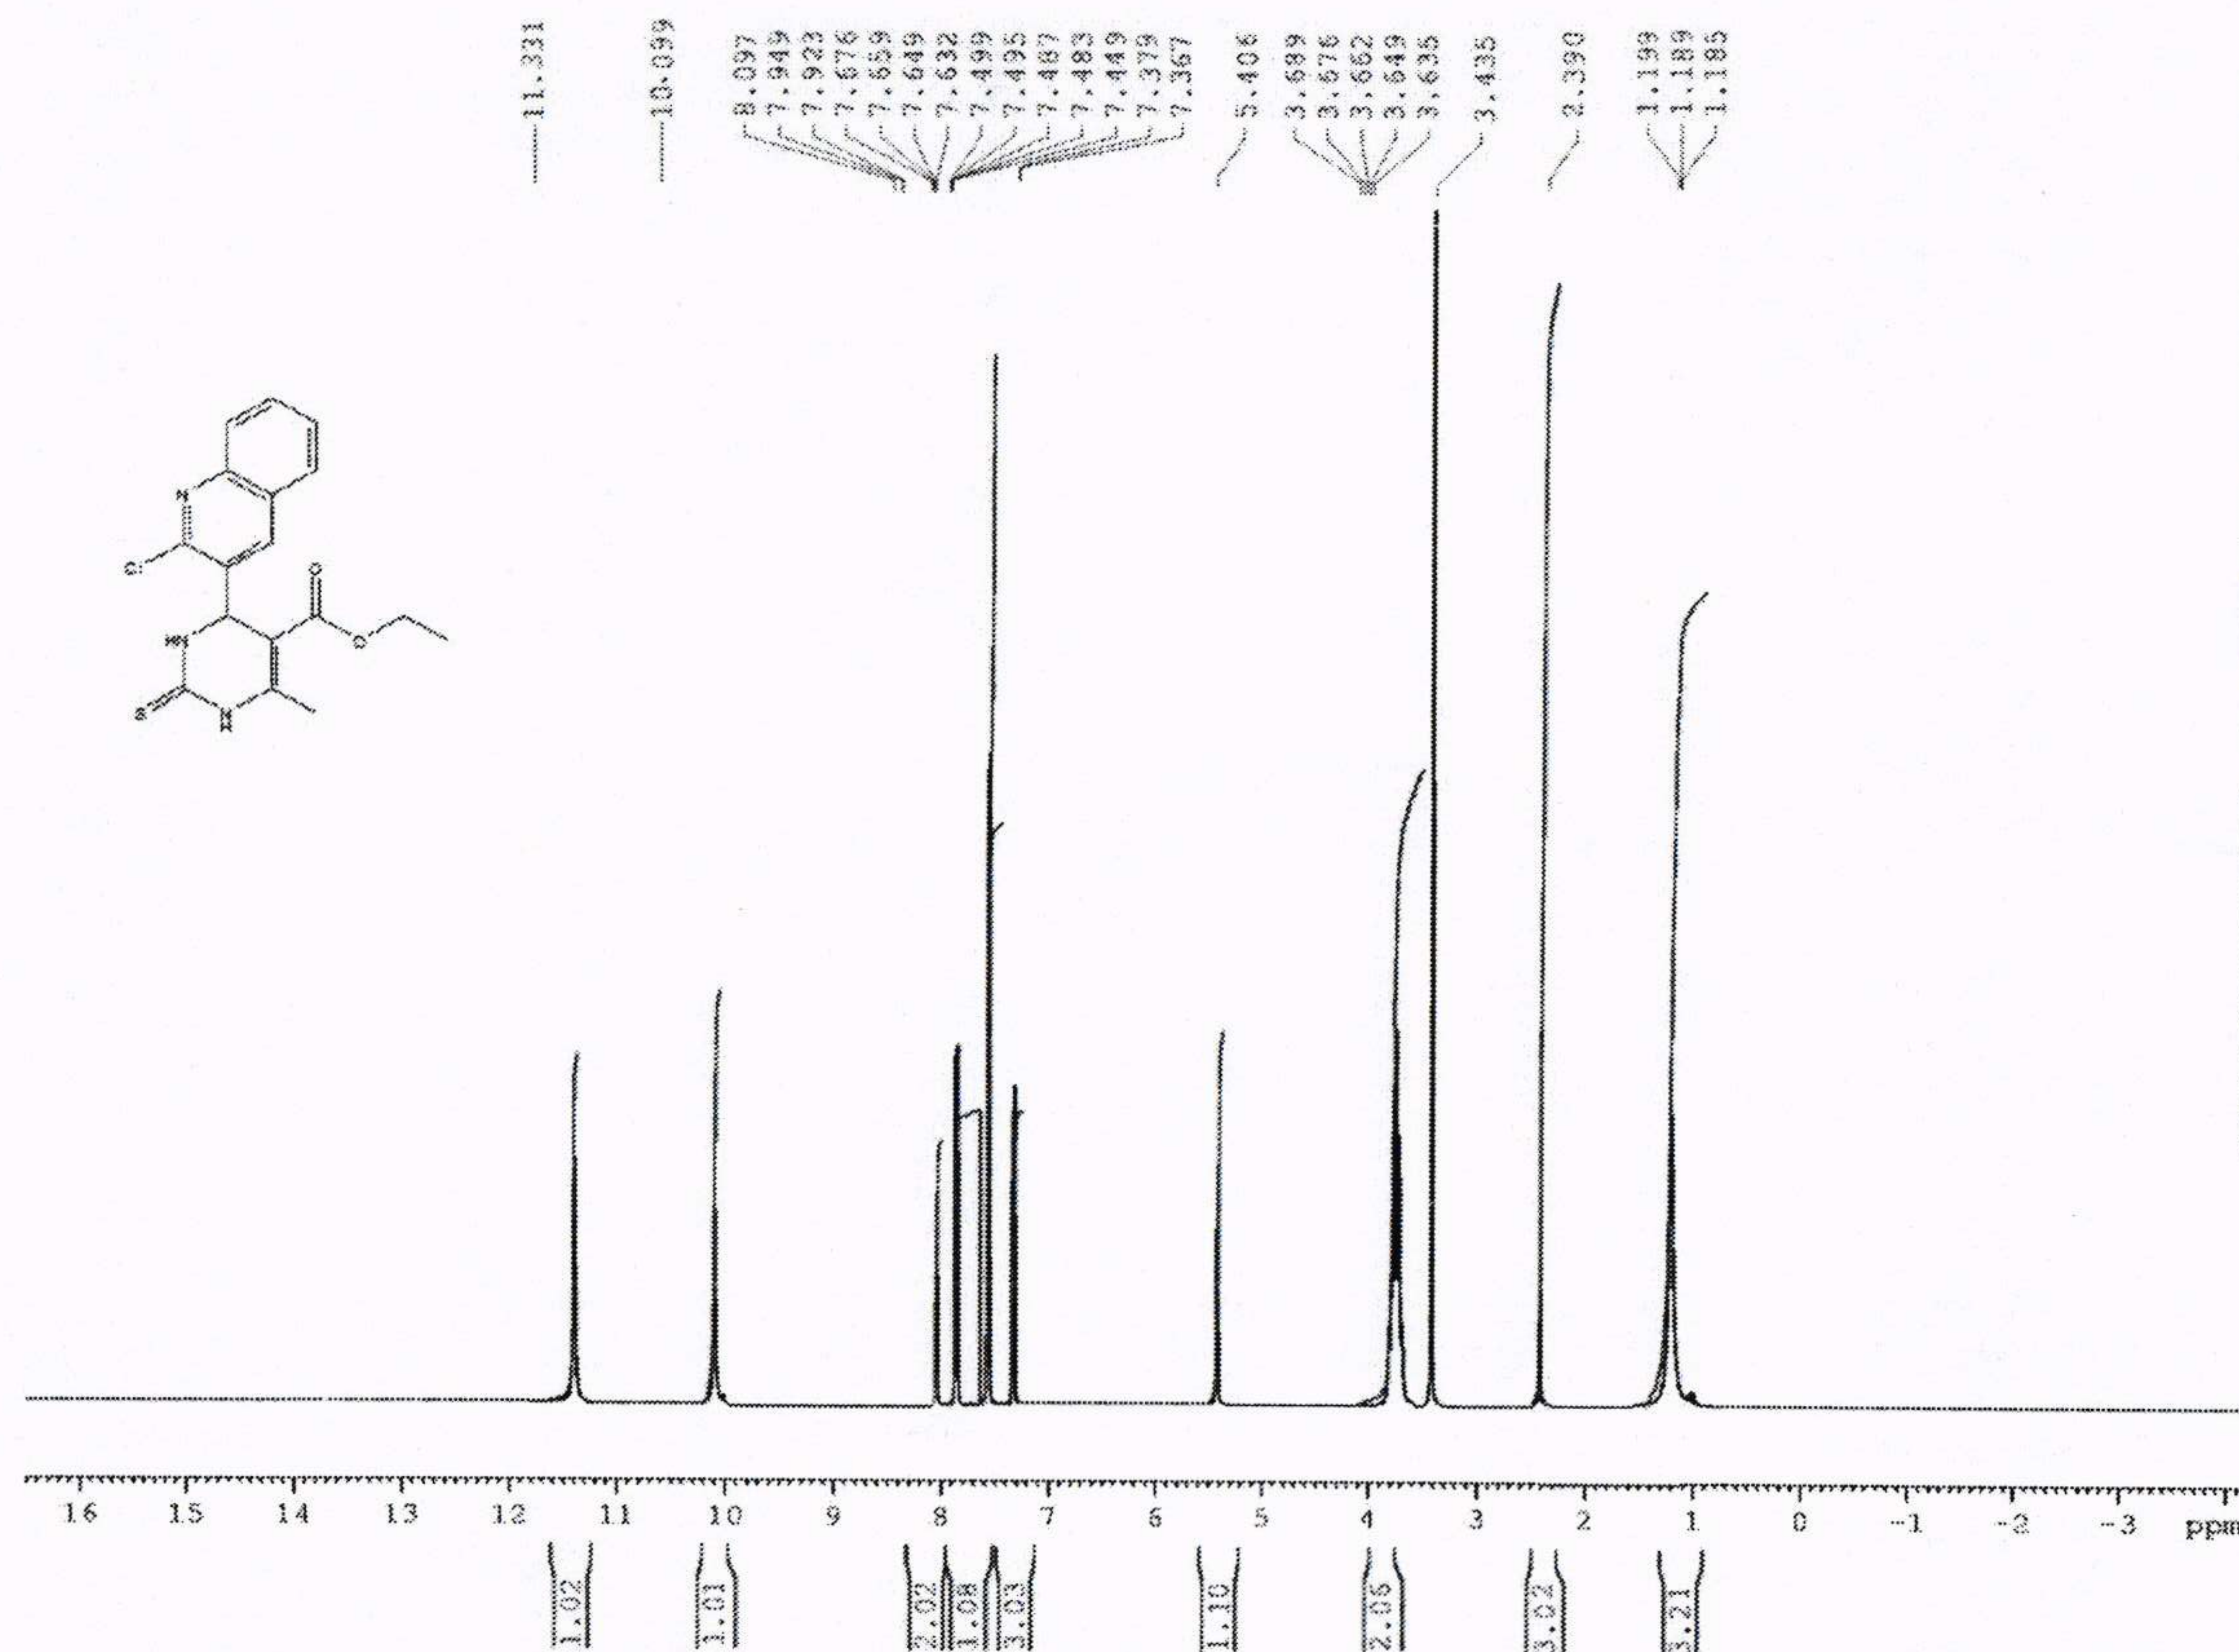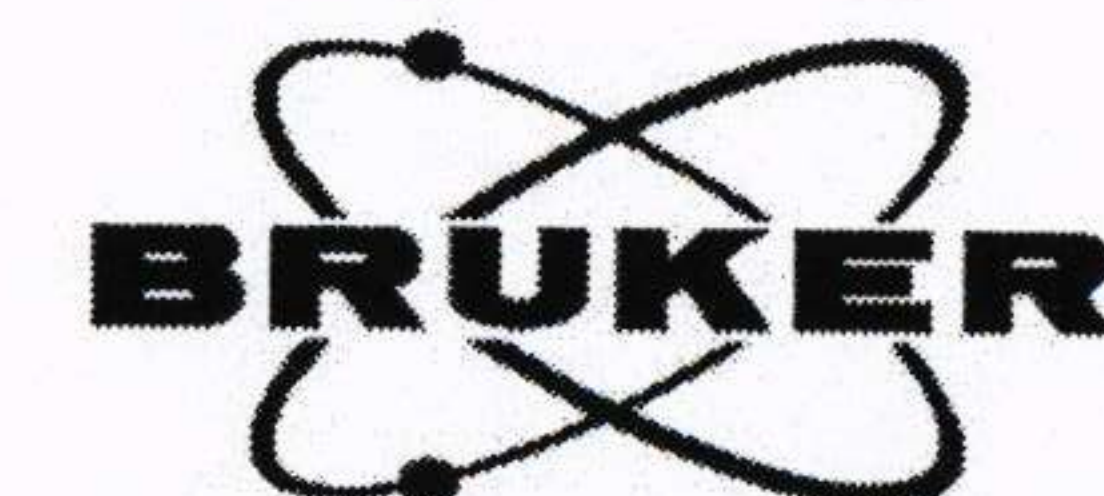

NAME drshahat-1  
EXPNO 10  
PROCNO 1  
Date\_ 20210624  
Time 18.59  
INSTRUM spect  
PROBHD 5 mm PABBO BB-  
PULPROG zg30  
TD 65536  
SOLVENT DMSO  
NS 16  
DS 2  
SWH 10330.578 Hz  
FIDRES 0.157632 Hz  
AQ 3.1720407 sec  
RG 90.5  
DW 48.400 usec  
DE 6.50 usec  
TE 298.3 K  
D1 1.00000000 sec  
TD0 1

===== CHANNEL f1 =====  
NUC1 1H  
P1 14.70 usec  
PL1 -1.10 dB  
SFO1 500.1330885 MHz  
SI 32768  
SF 500.1300000 MHz  
WDW EM  
SSB 0  
LB 0.30 Hz  
GB 0  
PC 1.00

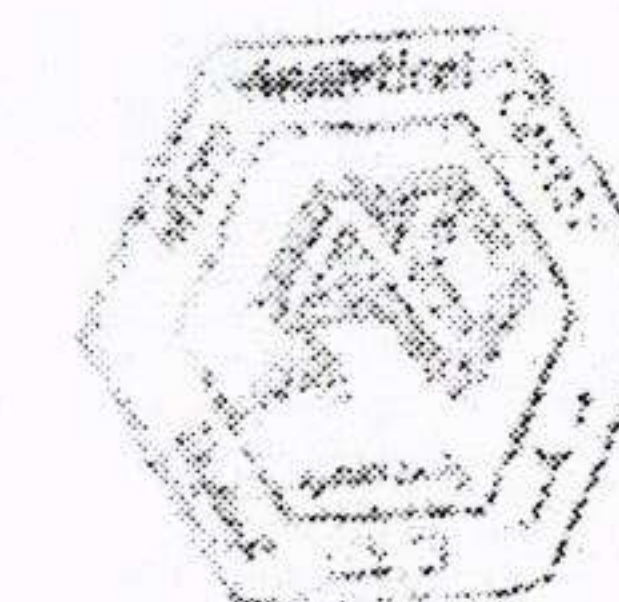



C13CPD32 DMSO D:\ abari 45

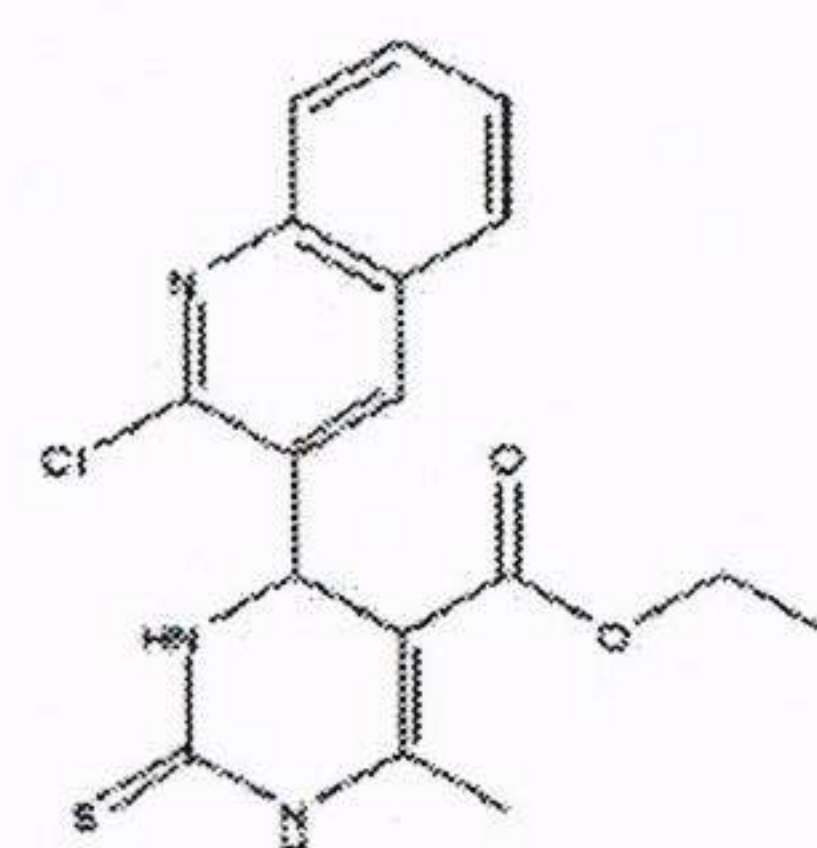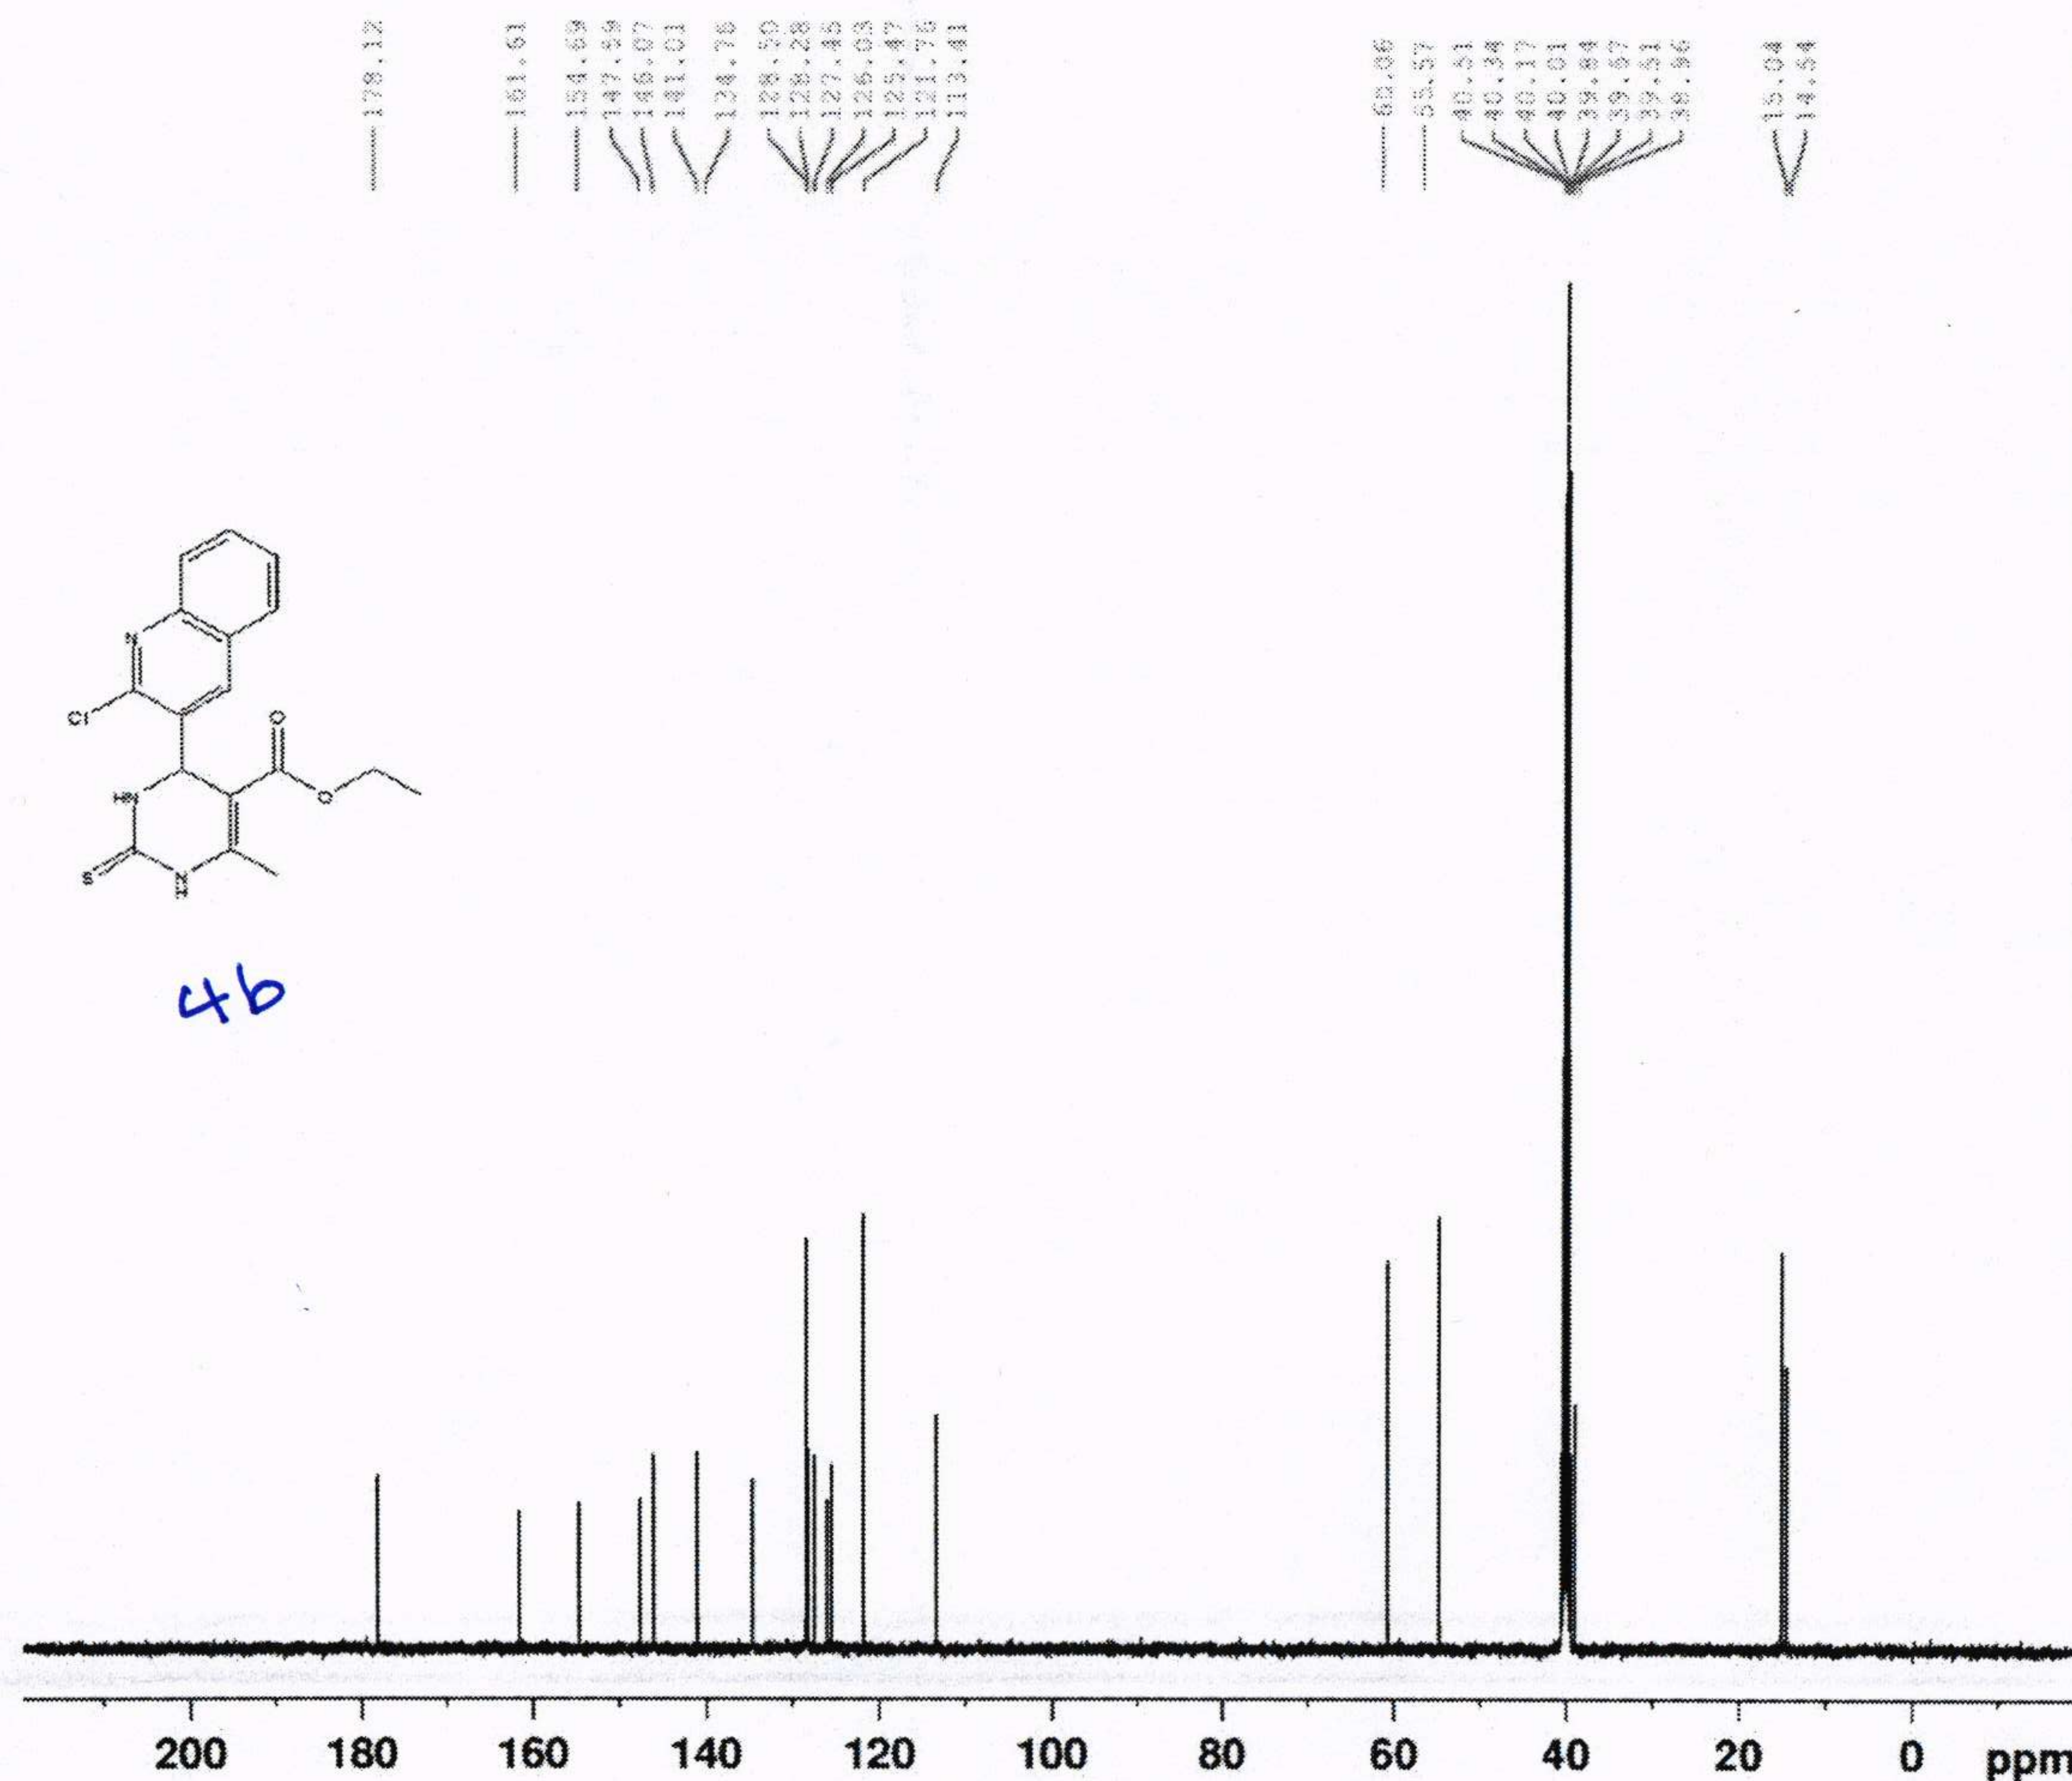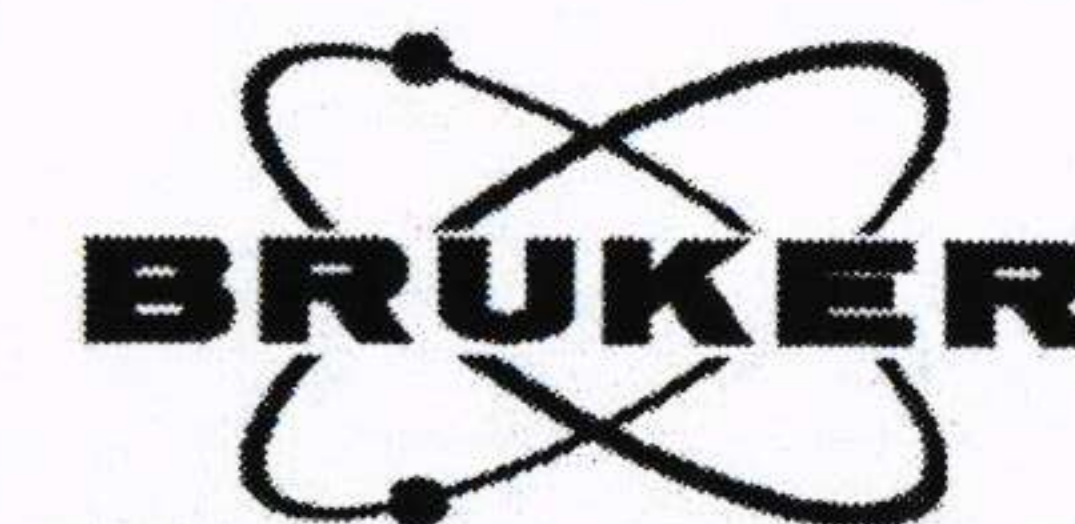

NAME drshahat-1  
 EXPNO 11  
 PROCNO 1  
 Date\_ 20210624  
 Time 13.45  
 INSTRUM spect  
 PROBHD 5 mm PABBO BB-  
 PULPROG zgpg30  
 TD 65536  
 SOLVENT DMSO  
 NS 1104  
 DS 2  
 SWH 30030.029 Hz  
 FIDRES 0.458222 Hz  
 AQ 1.0912410 sec  
 RG 2048  
 DW 16.650 usec  
 DE 6.50 usec  
 TE 299.0 K  
 D1 2.00000000 sec  
 D11 0.03000000 sec  
 TD0 1

===== CHANNEL f1 =====  
 NUC1 13C  
 P1 20.00 usec  
 PL1 -6.00 dB  
 SFO1 125.7703643 MHz

===== CHANNEL f2 =====  
 CPDPRG2 waltz16  
 NUC2 1H  
 PCPD2 80.00 usec  
 PL2 -1.10 dB  
 PL12 13.44 dB  
 PL13 16.40 dB  
 SFO2 500.1320005 MHz  
 SI 32768  
 SF 125.7577890 MHz  
 WDW EM  
 SSB 0  
 LB 1.00 Hz  
 GB 0  
 PC 1.40

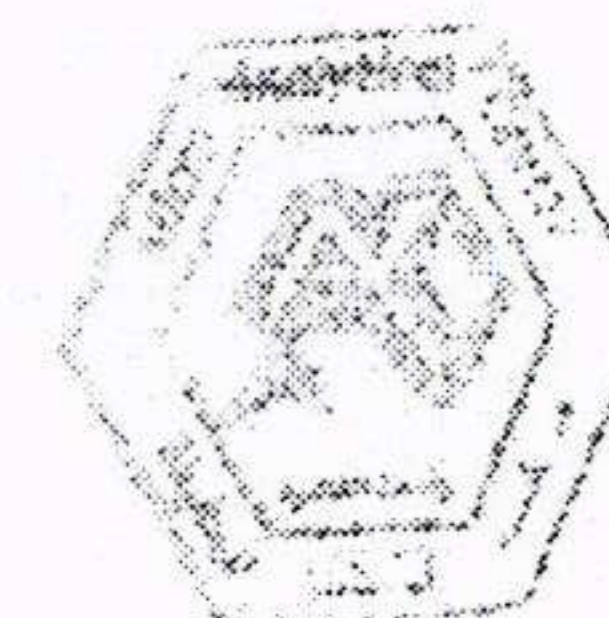



Ethyl 4-(1,3-diphenyl-1H-pyrazol-4-yl)-6-methyl-2-thioxo-1,2,3,4-tetrahydropyrimidine-5-carboxylate

4c

ON DMSO D:\ abar

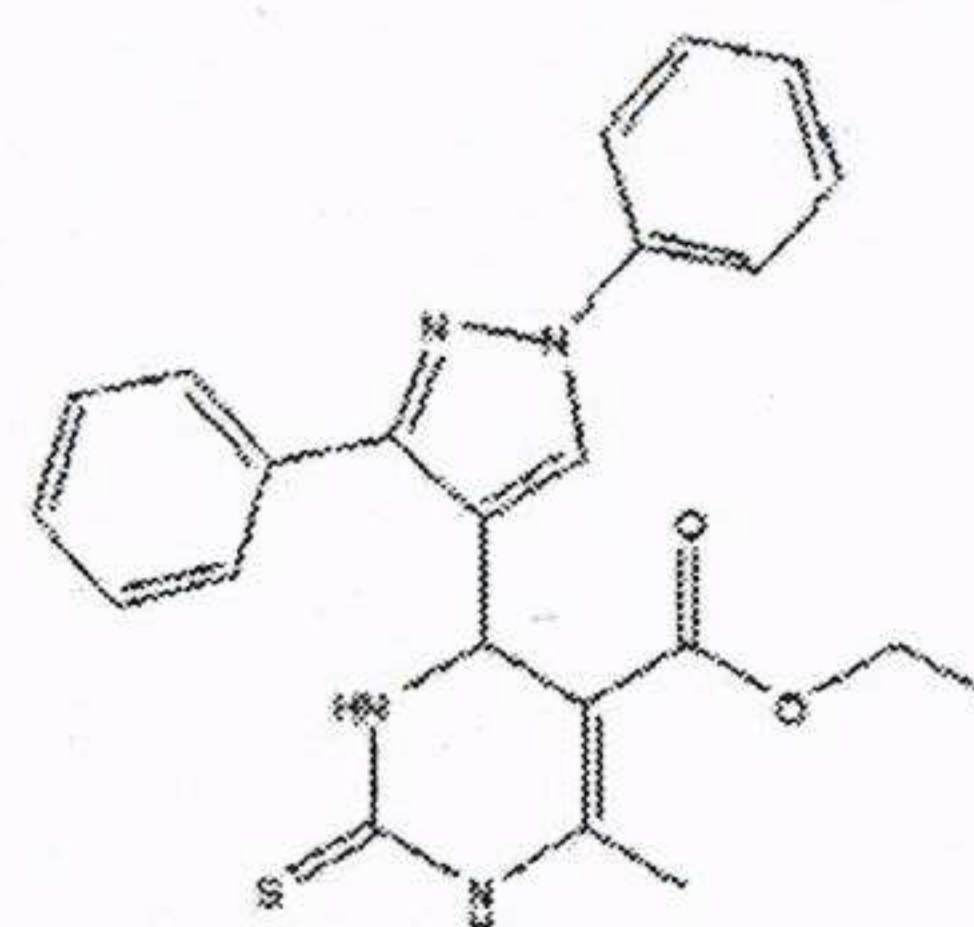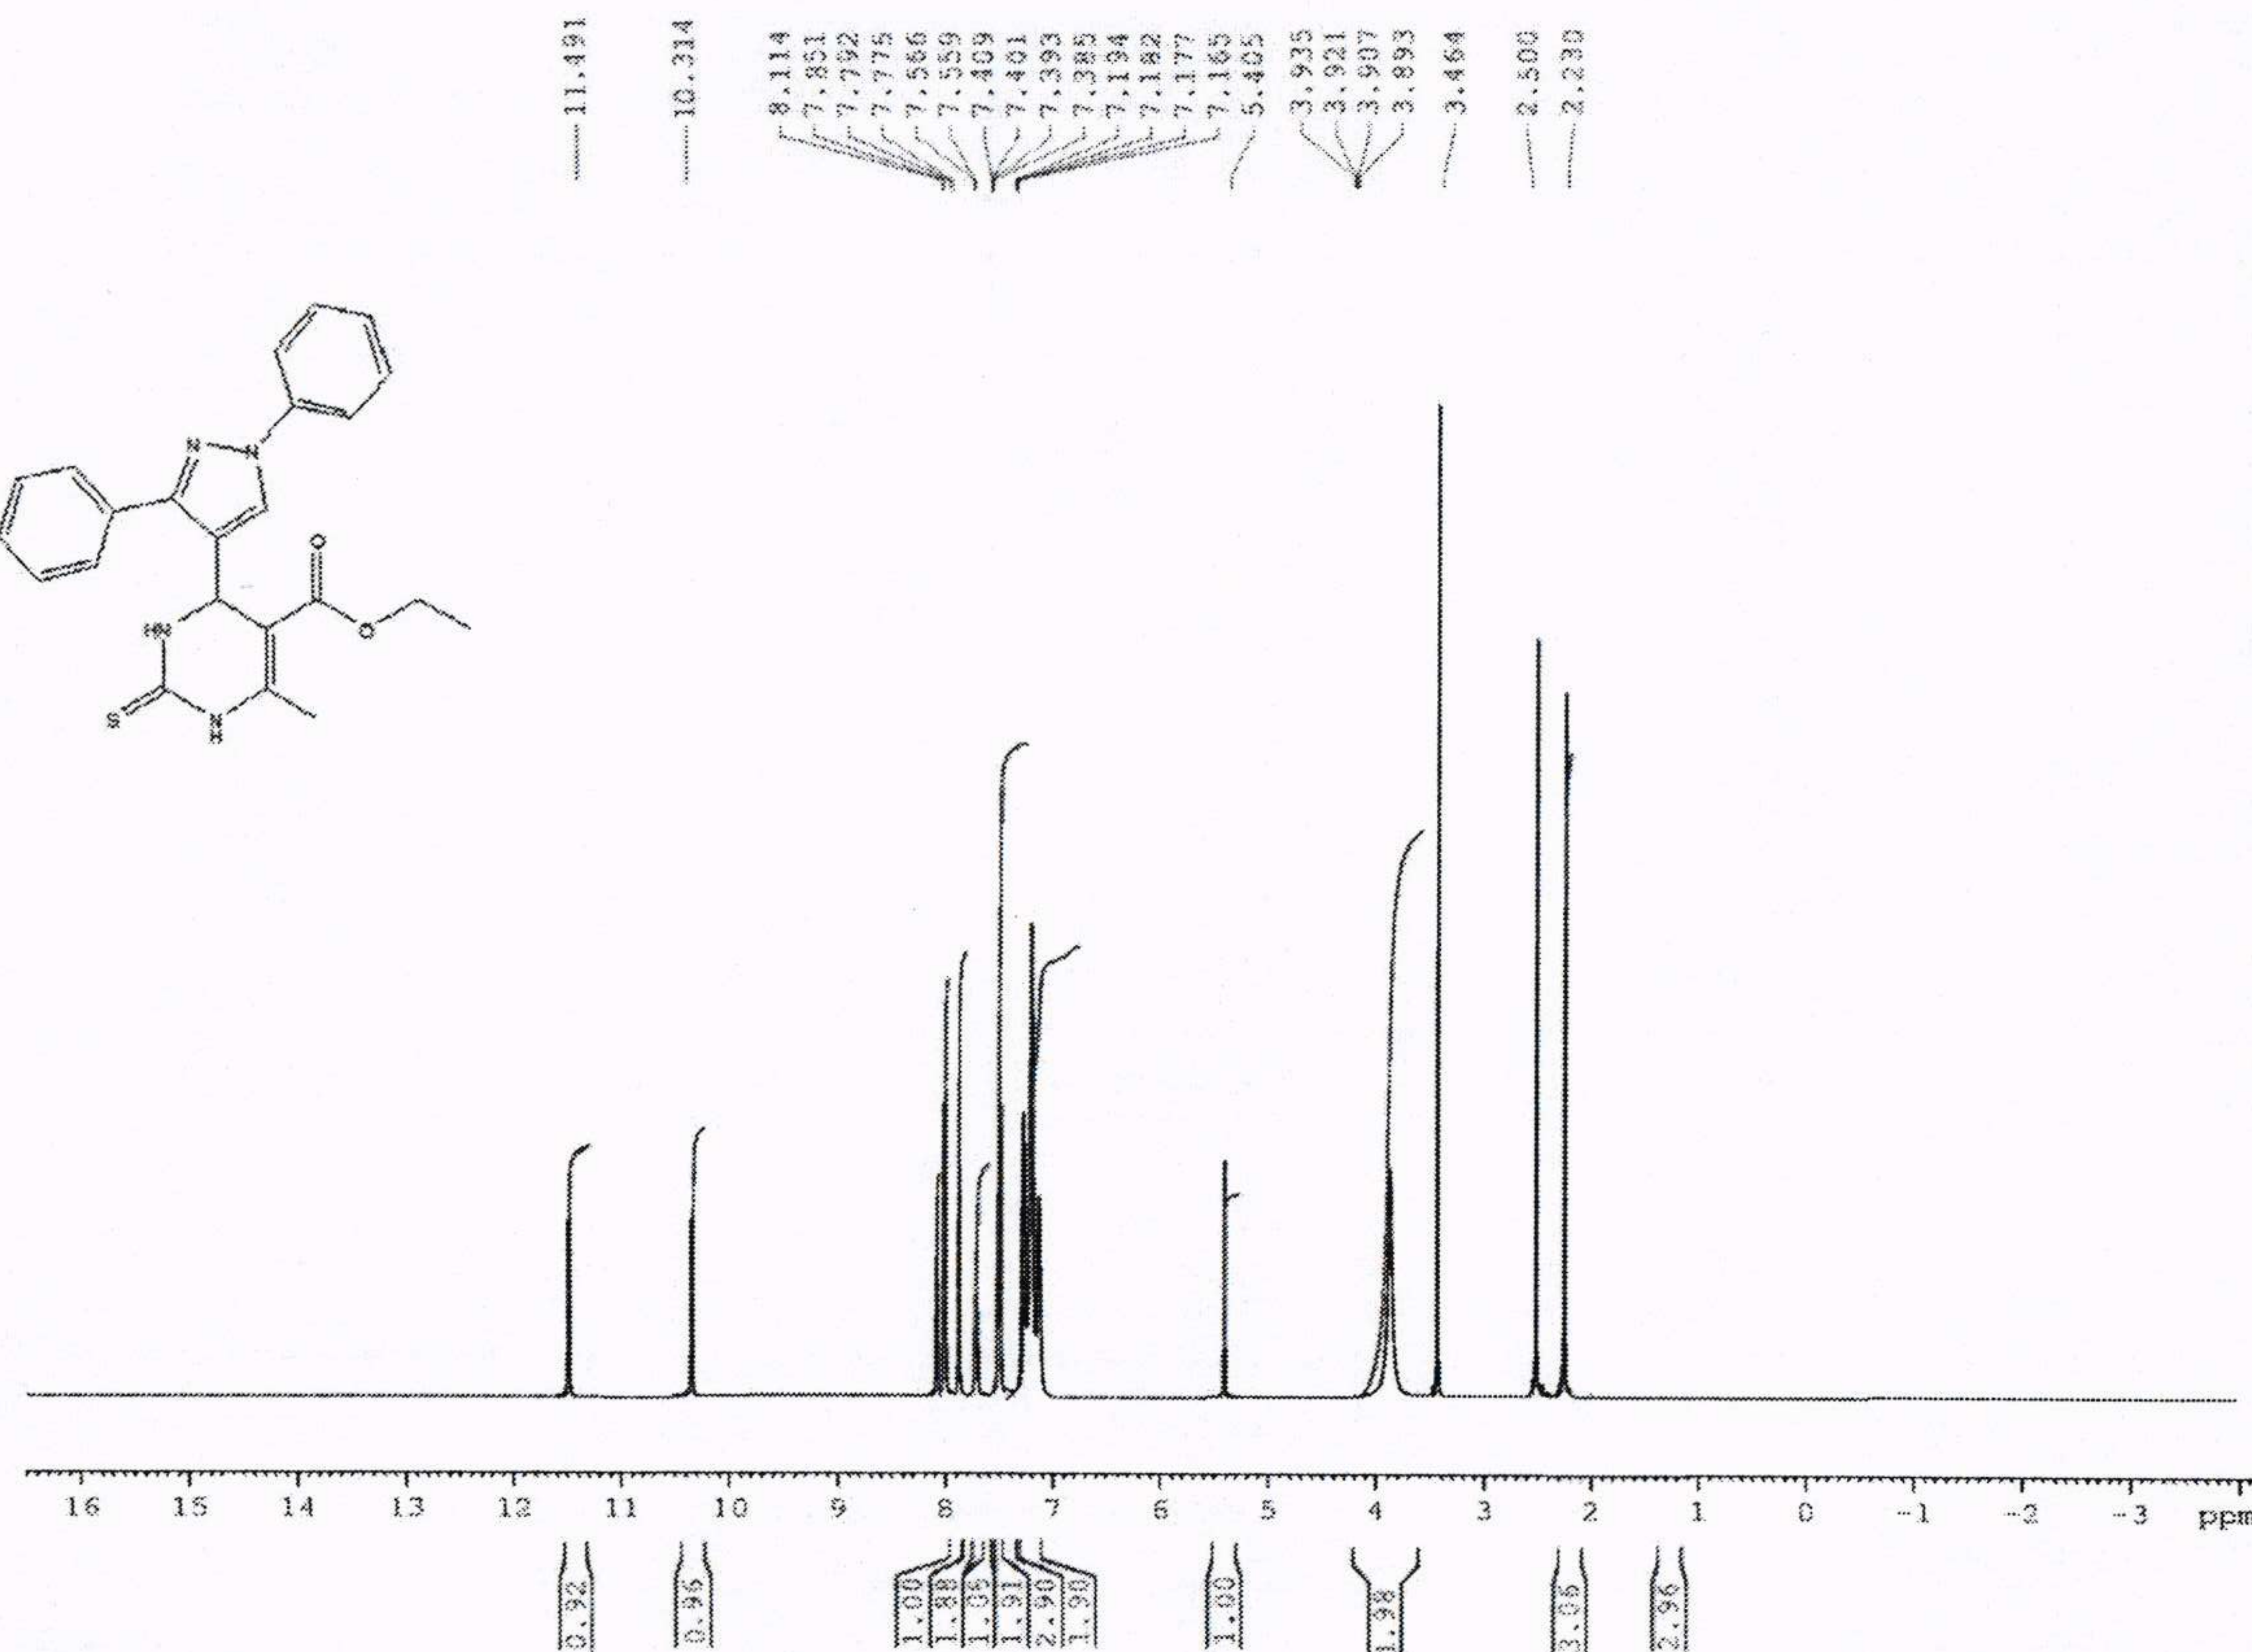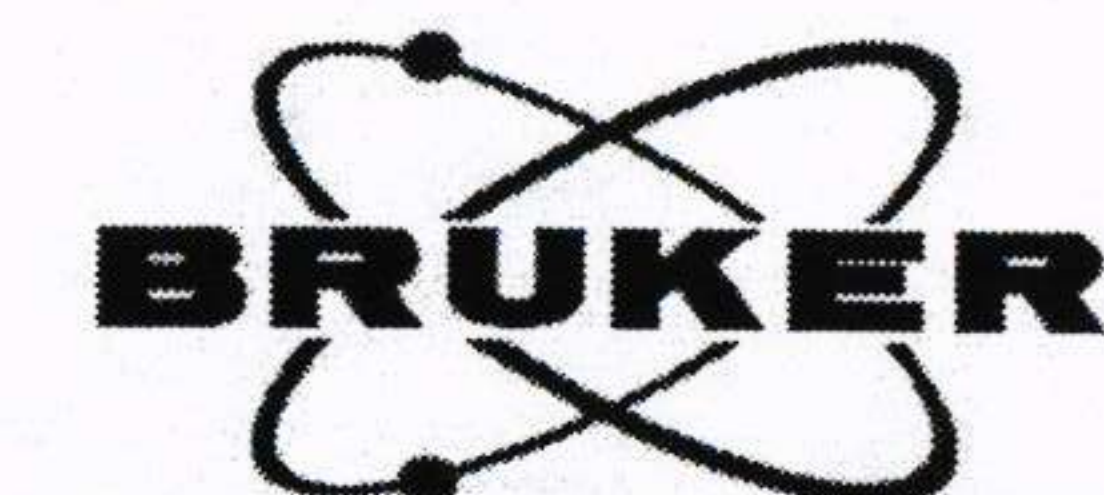

NAME drshahat-3  
 EXPNO 10  
 PROCNO 1  
 Date\_ 20210624  
 Time 11.17  
 INSTRUM spect  
 PROBHD 5 mm PABBO BB-  
 PULPROG zg30  
 TD 65536  
 SOLVENT DMSO  
 NS 16  
 DS 2  
 SWH 10330.578 Hz  
 FIDRES 0.157632 Hz  
 AQ 3.1720407 sec  
 RG 128  
 DW 48.400 usec  
 DE 6.50 usec  
 TE 298.3 K  
 D1 1.00000000 sec  
 TD0 1

===== CHANNEL f1 =====  
 NUC1 1H  
 P1 14.70 usec  
 PL1 -1.10 dB  
 SFO1 500.1330885 MHz  
 SI 32768  
 SF 500.1300000 MHz  
 WDW EM  
 SSB 0  
 LB 0.30 Hz  
 GB 0  
 PC 1.00

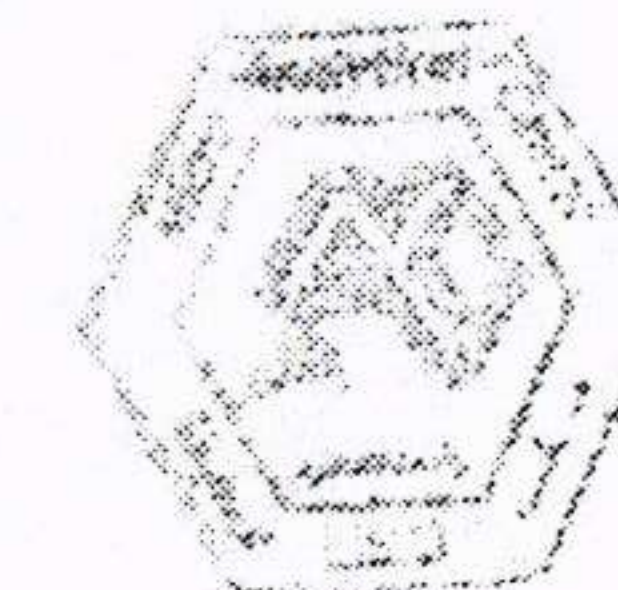



C13CPD32 DMSO D:\\ abari 44

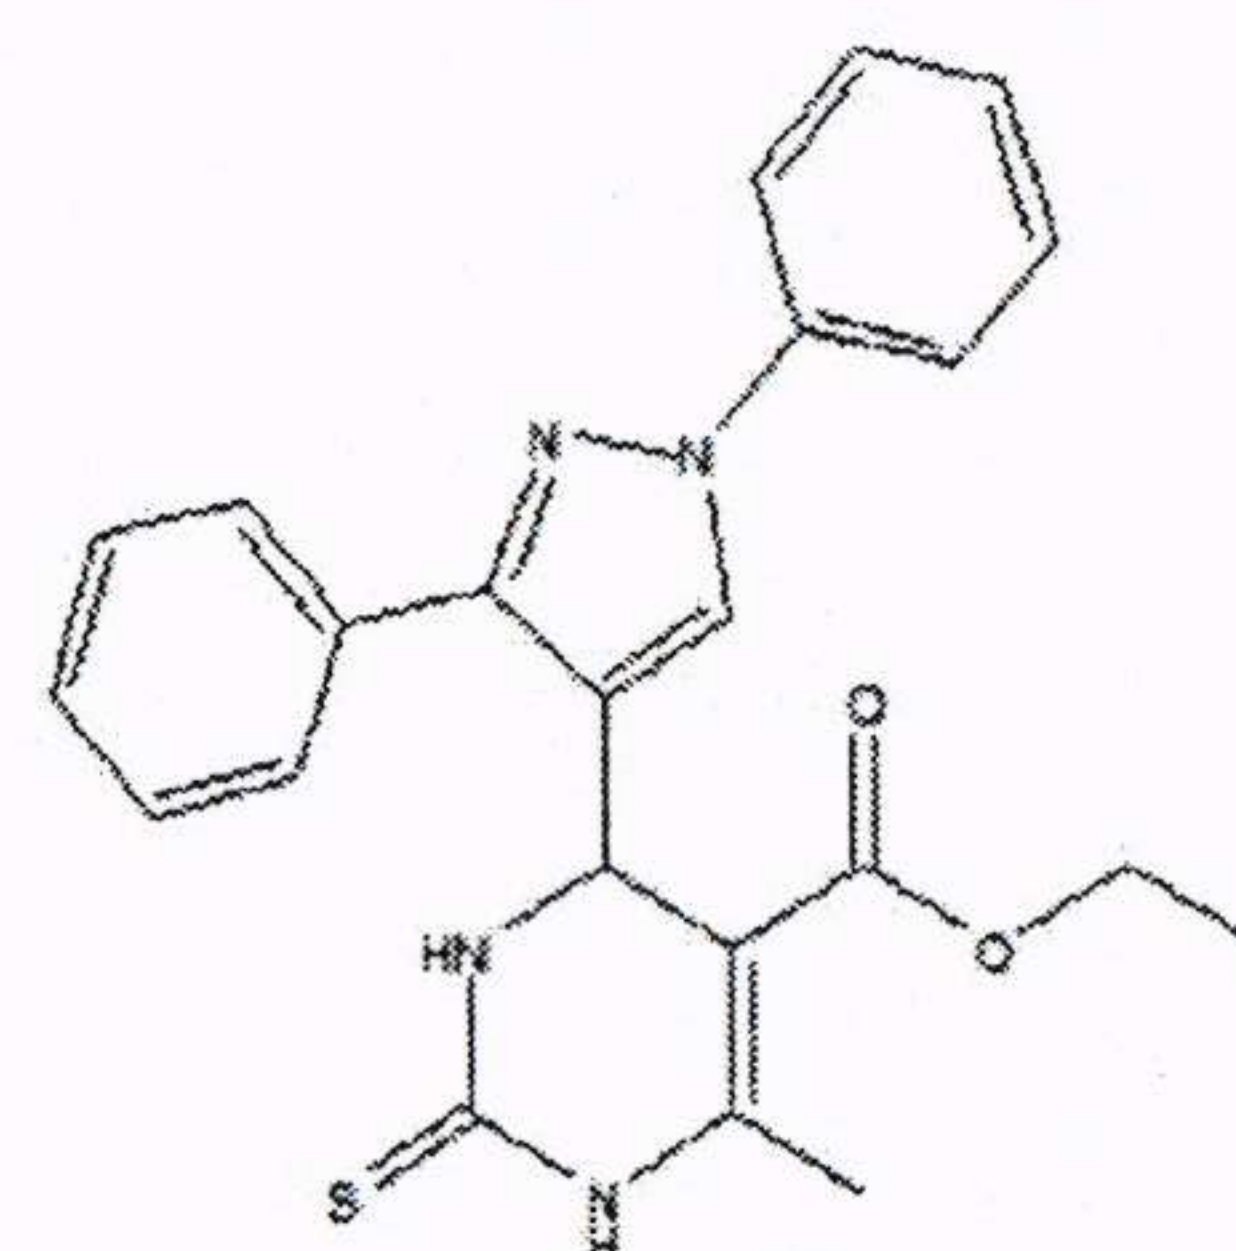

4c

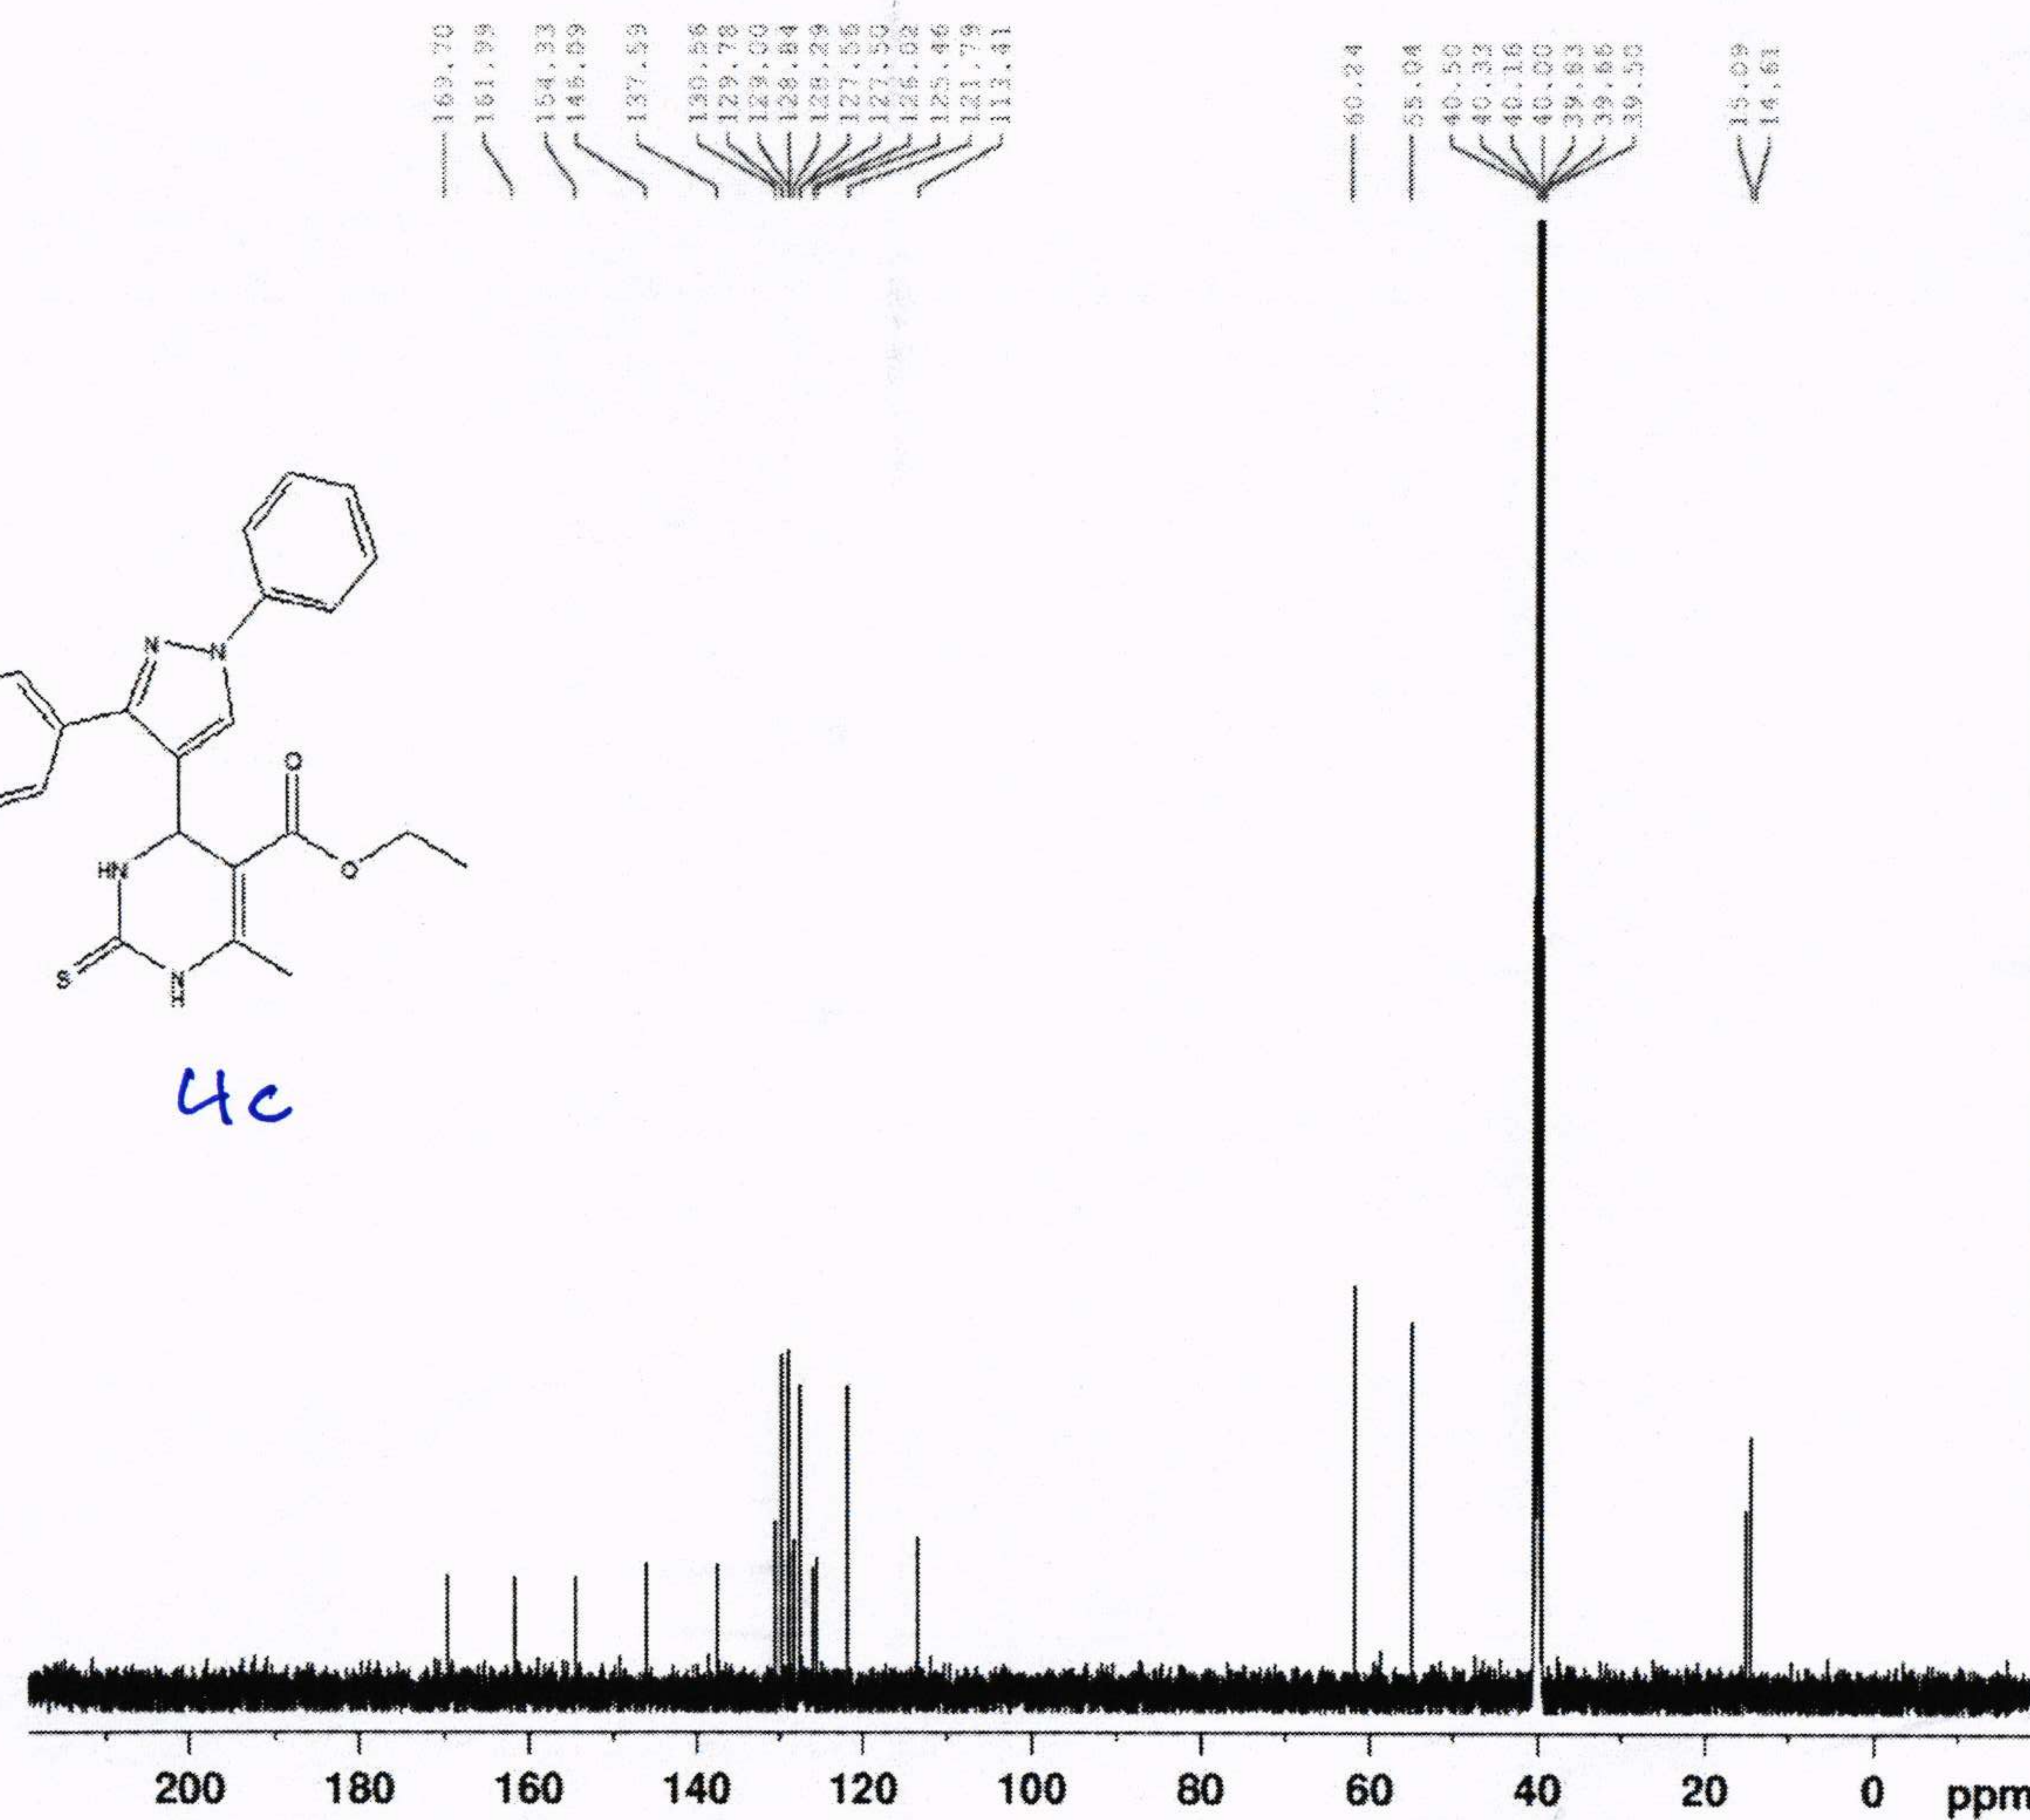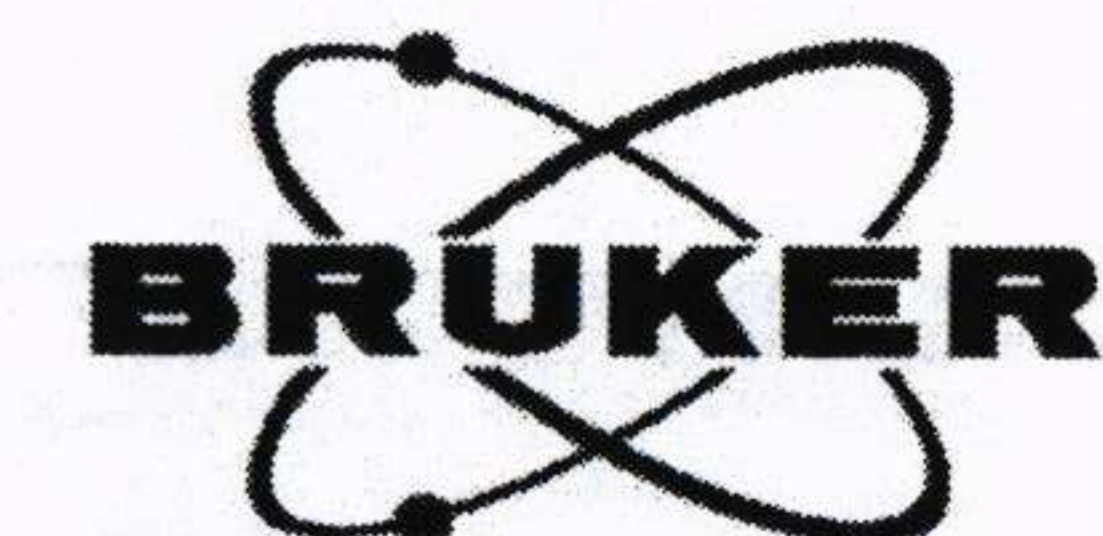

NAME drshahat-3  
 EXPNO 11  
 PROCNO 1  
 Date\_ 20210624  
 Time 12.07  
 INSTRUM spect  
 PROBHD 5 mm PABBO BB-  
 PULPROG zgpg30  
 TD 65536  
 SOLVENT DMSO  
 NS 1165  
 DS 2  
 SWH 30030.029 Hz  
 FIDRES 0.458222 Hz  
 AQ 1.0912410 sec  
 RG 4597.6  
 DW 16.650 usec  
 DE 6.50 usec  
 TE 299.2 K  
 D1 2.00000000 sec  
 D11 0.03000000 sec  
 TDO 1

===== CHANNEL f1 =====  
 NUC1 13C  
 P1 20.00 usec  
 PL1 -6.00 dB  
 SFO1 125.7703643 MHz

===== CHANNEL f2 =====  
 CPDPRG2 waltz16  
 NUC2 1H  
 PCPD2 80.00 usec  
 PL2 -1.10 dB  
 PL12 13.44 dB  
 PL13 16.40 dB  
 SFO2 500.1320005 MHz  
 SI 32768  
 SF 125.7577890 MHz  
 WDW EM  
 SSB 0  
 LB 1.00 Hz  
 GB 0  
 PC 1.40

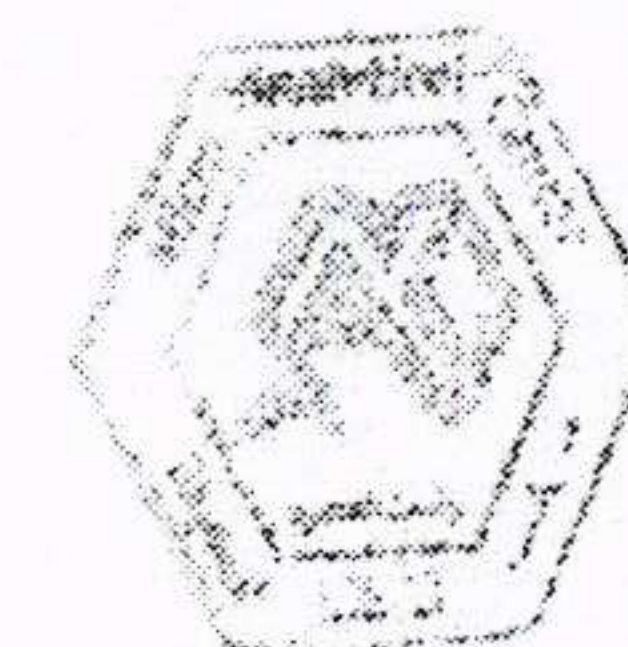



4-(1H-Indol-3-yl)-6-methyl-2-thioxo-1,2,3,4-tetrahydropyrimidine-5-carboxylic acid

5a

ON DMSO D:\ abar

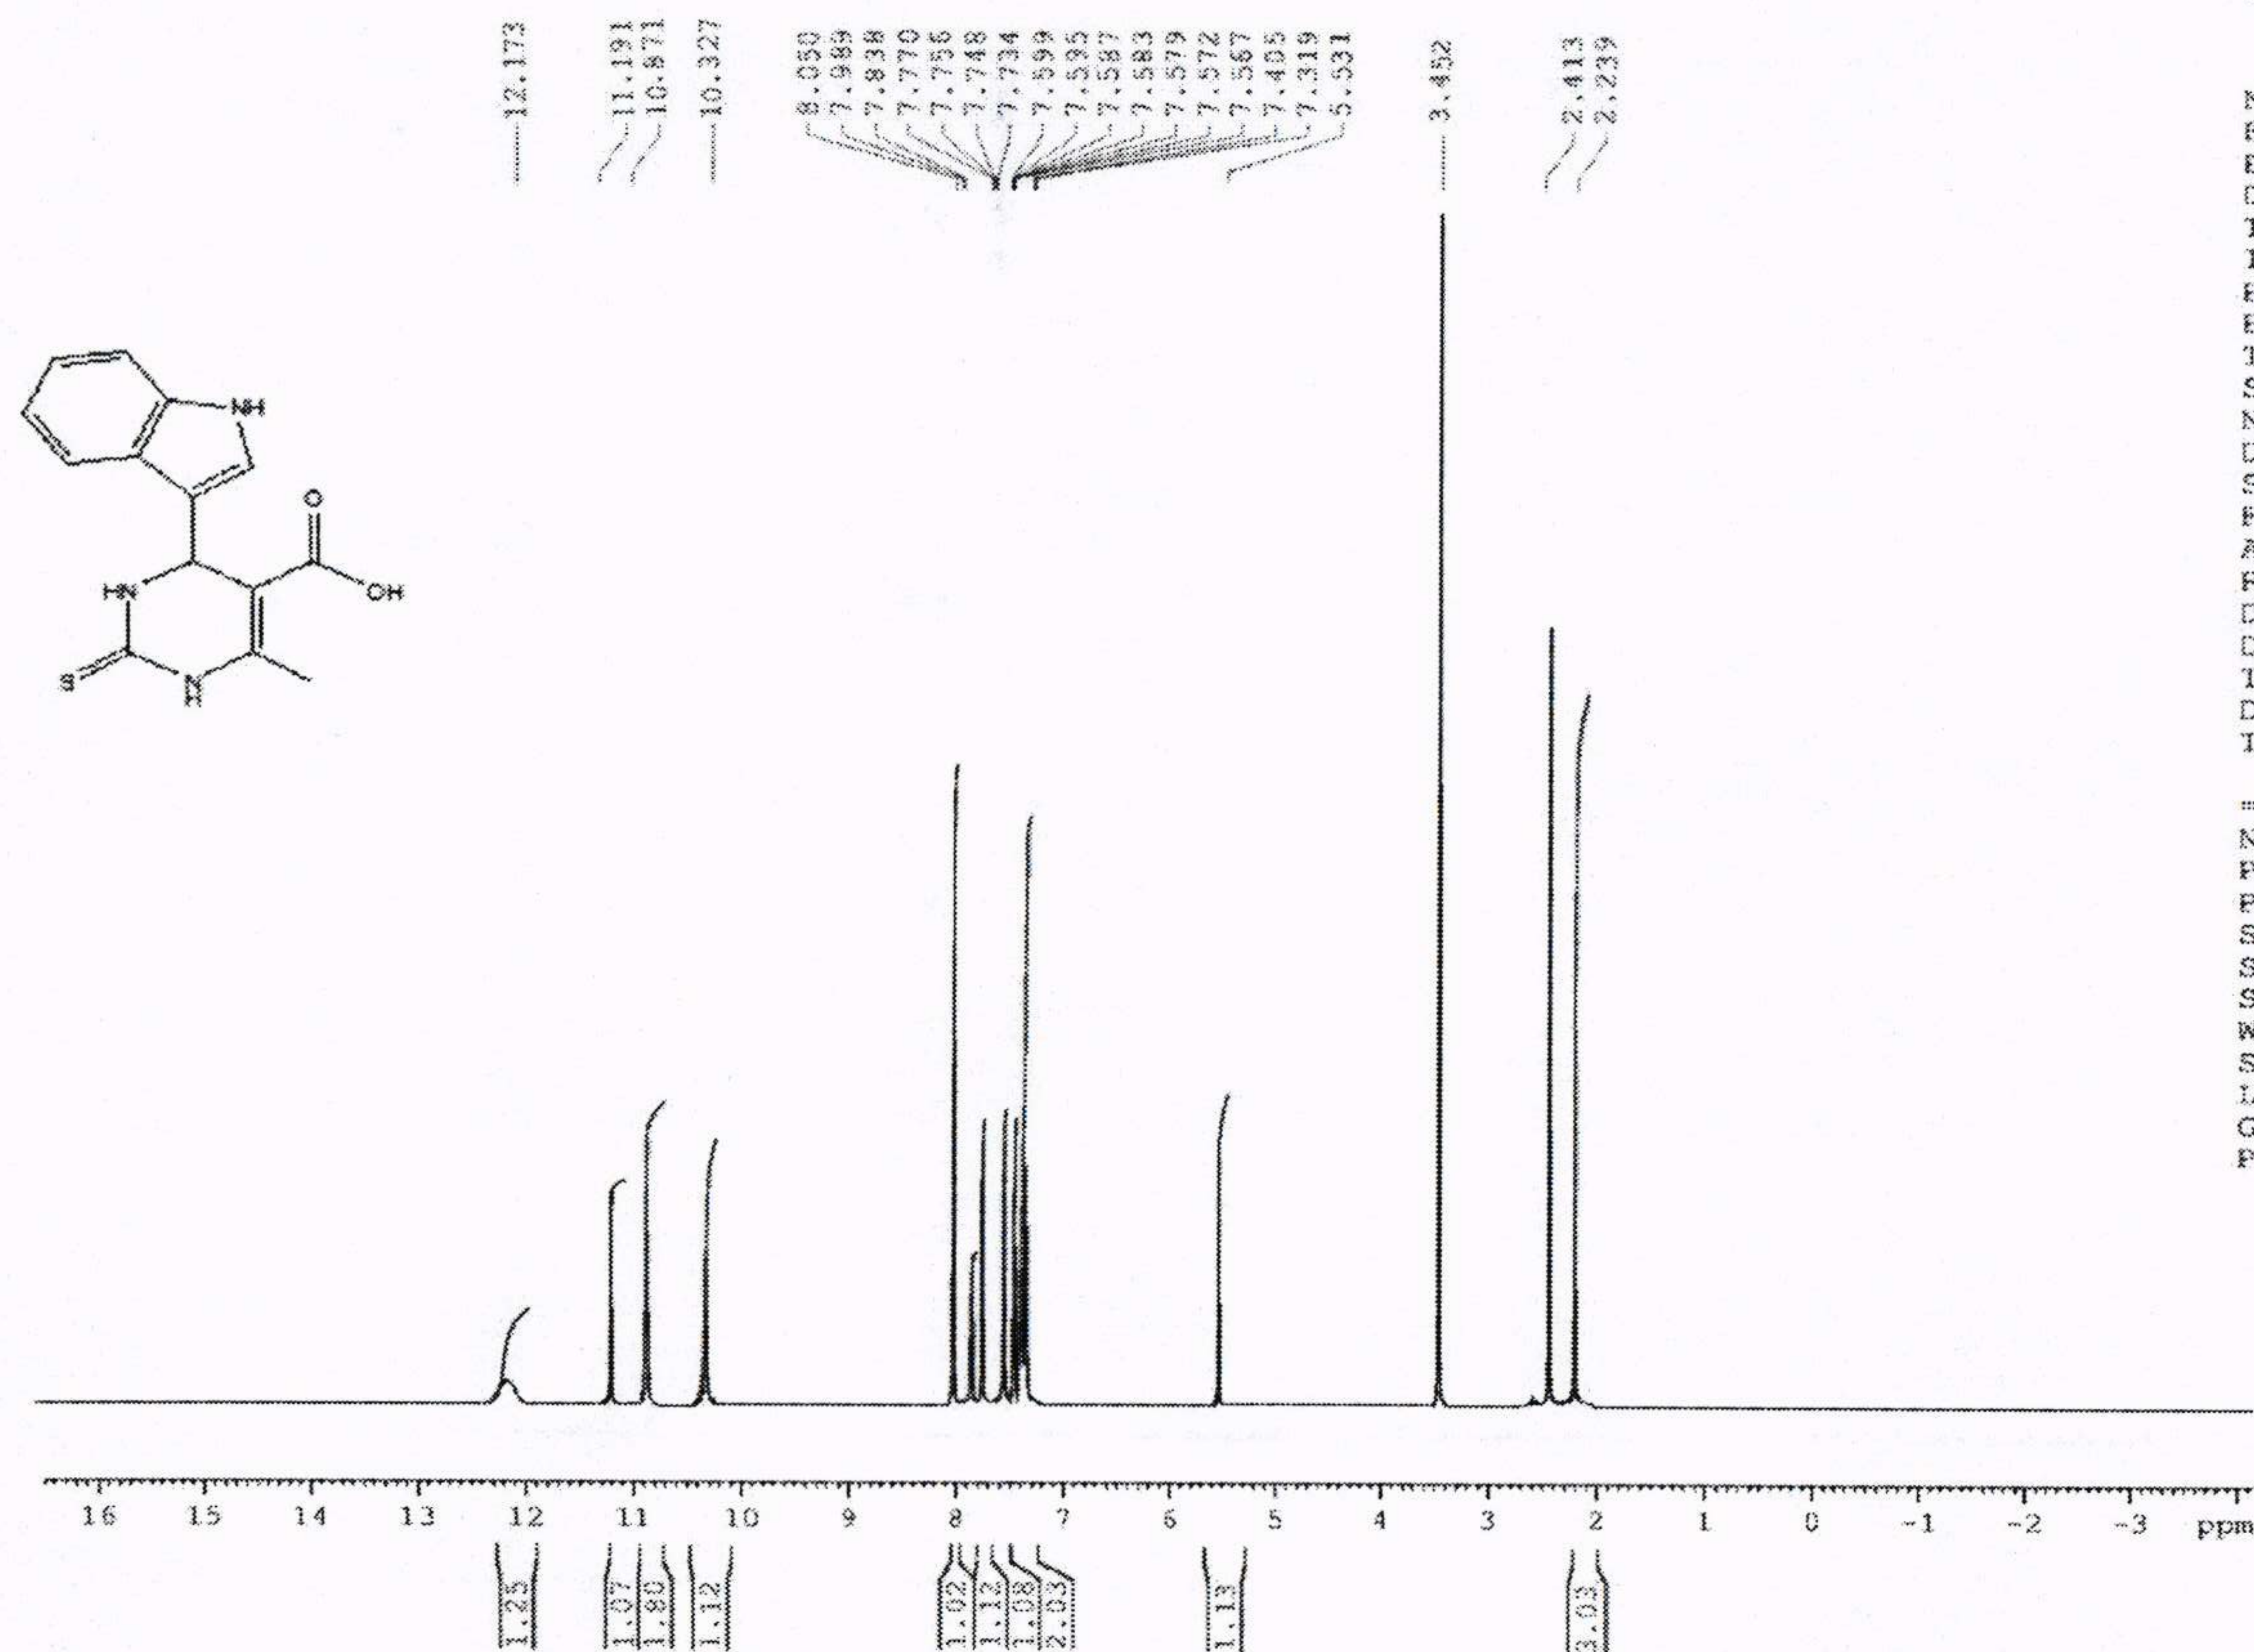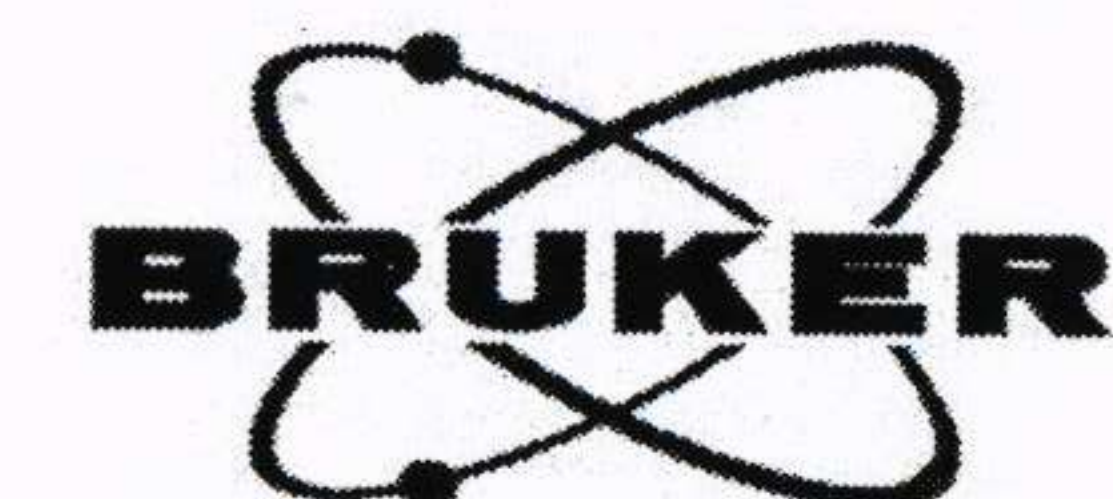

NAME dcshahat-5  
 EXPNO 10  
 PROCNO 1  
 Date\_ 20210624  
 Time 18.59  
 INSTRUM spect  
 PROBHD 5 mm PABBO BB-  
 PULPROG zg30  
 TD 65536  
 SOLVENT DMSO  
 NS 16  
 DS 2  
 SWH 10330.578 Hz  
 FIDRES 0.157632 Hz  
 AQ 3.1720407 sec  
 RG 90.5  
 DW 48.400 usec  
 DE 6.50 usec  
 TE 298.3 K  
 D1 1.00000000 sec  
 TD0 1

===== CHANNEL f1 =====  
 NUC1 1H  
 P1 14.70 usec  
 PL1 -1.10 dB  
 SFO1 500.1330885 MHz  
 SI 32768  
 SF 500.1300000 MHz  
 WDW EM  
 SSB 0  
 LB 0.30 Hz  
 GB 0  
 PC 1.00

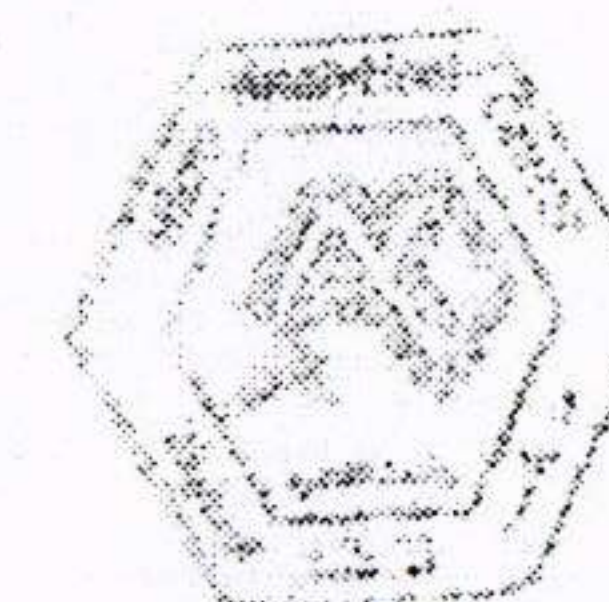



C13CPD32 DMSO D:\\ abari 46

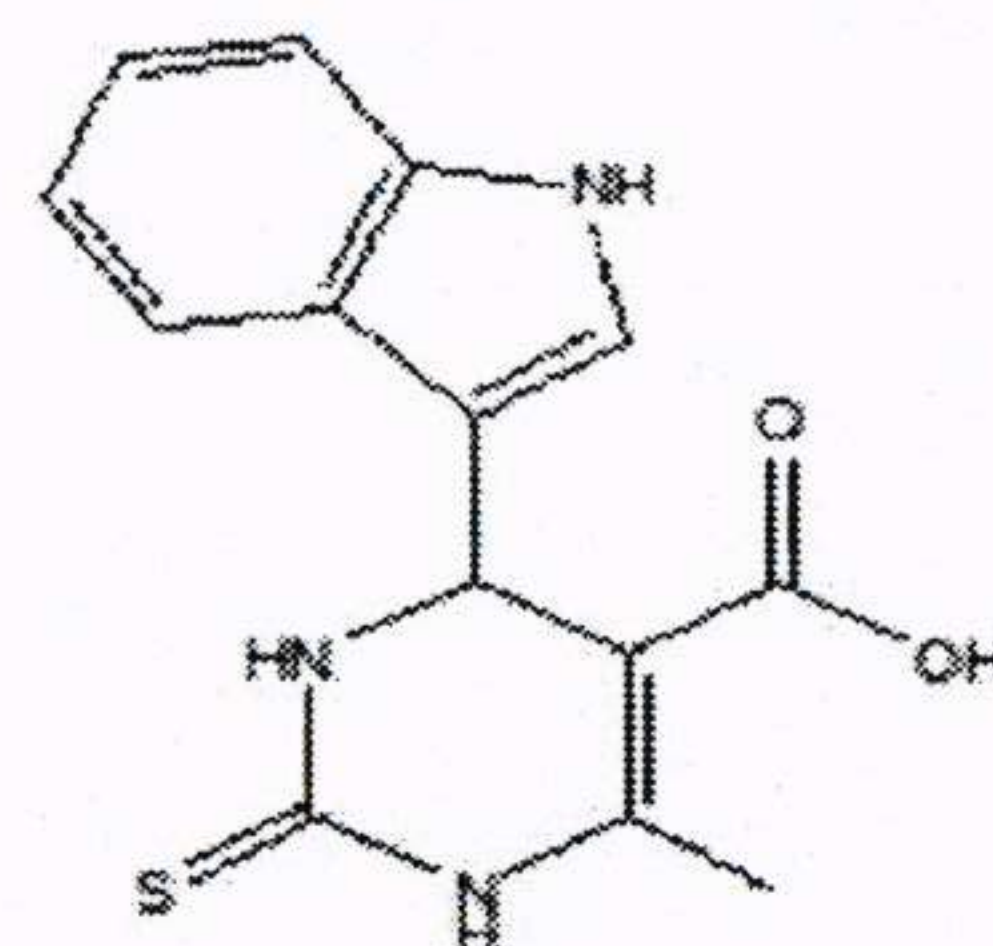

5a

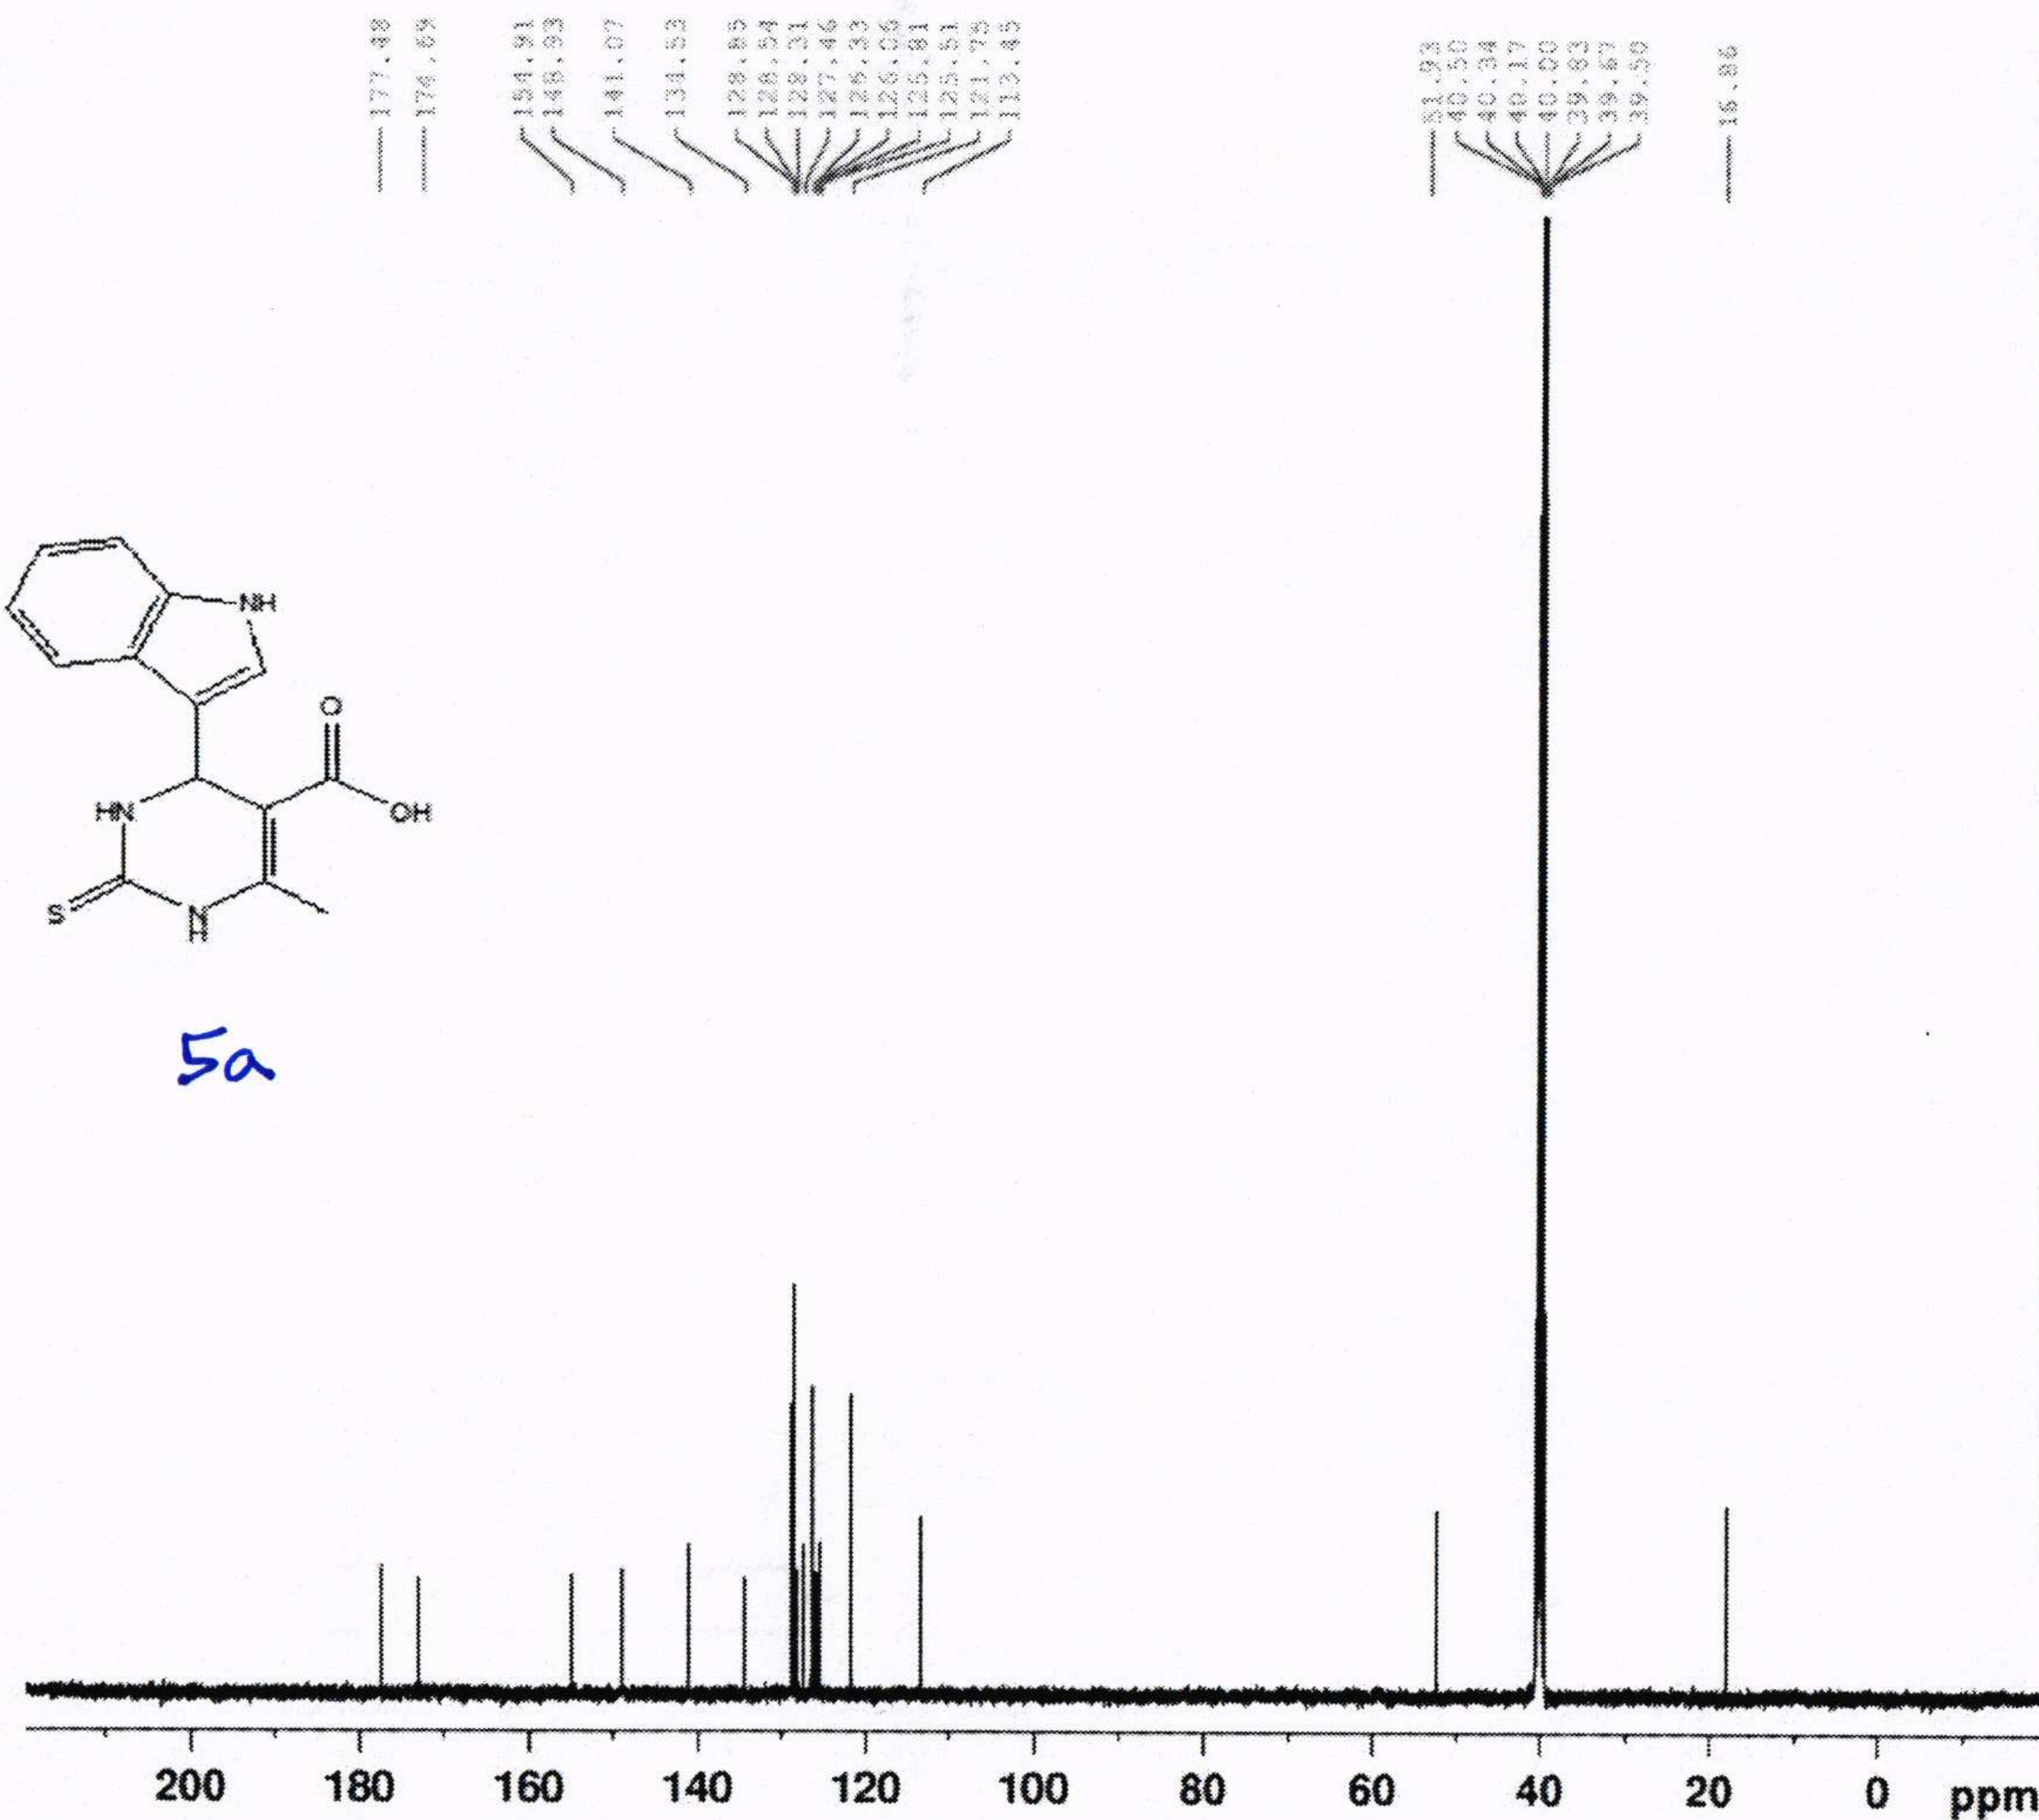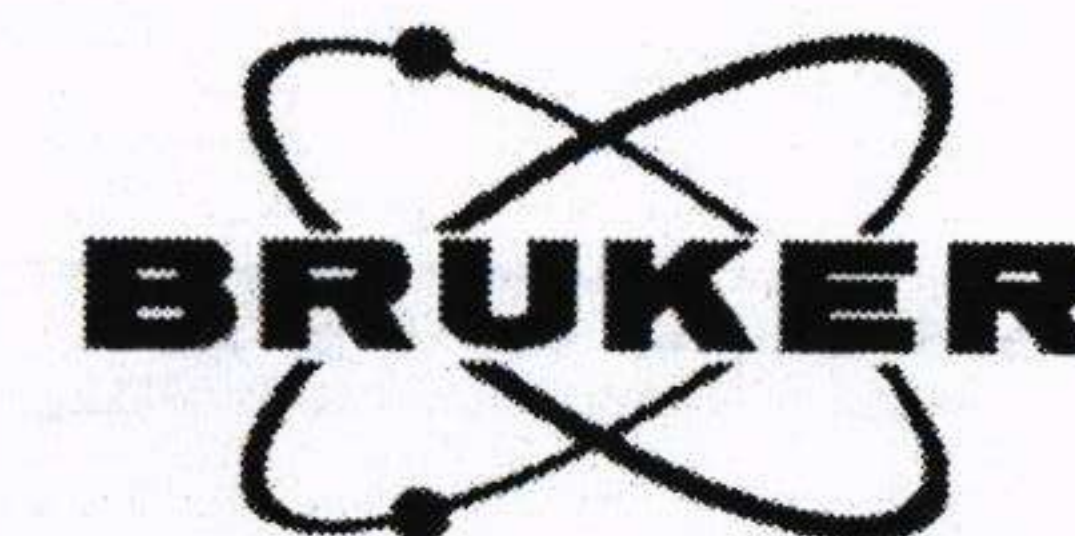

NAME drshahat-5  
 EXPNO 11  
 PROCNO 1  
 Date\_ 20210624  
 Time 20.47  
 INSTRUM spect  
 PROBHD 5 mm PABBO BB-  
 PULPROG zgpg30  
 TD 65536  
 SOLVENT DMSO  
 NS 2000  
 DS 2  
 SWH 30030.029 Hz  
 FIDRES 0.458222 Hz  
 AQ 1.0912410 sec  
 RG 14596.5  
 DW 16.650 usec  
 DE 6.50 usec  
 TE 299.1 K  
 D1 2.00000000 sec  
 D11 0.03000000 sec  
 TD0 1

===== CHANNEL f1 =====  
 NUC1 13C  
 P1 20.00 usec  
 PL1 -6.00 dB  
 SFO1 125.7703643 MHz

===== CHANNEL f2 =====  
 CPDPRG2 waltz16  
 NUC2 1H  
 PCPD2 80.00 usec  
 PL2 -1.10 dB  
 PL12 13.44 dB  
 PL13 16.40 dB  
 SFO2 500.1320005 MHz  
 SI 32768  
 SF 125.7577890 MHz  
 WDW EM  
 SSB 0  
 LB 1.00 Hz  
 GB 0  
 FC 1.40

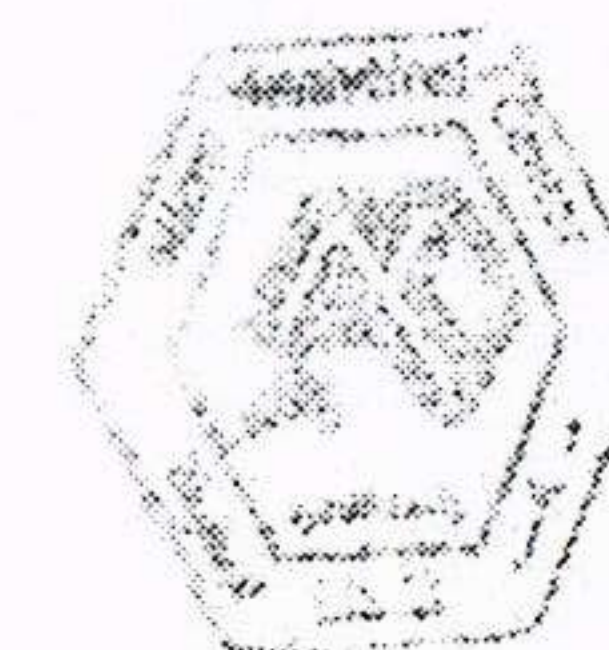



4-(2-Chloroquinolin-3-yl)-6-methyl-2-thioxo-1,2,3,4-tetrahydropyrimidine-5-carboxylic acid

5b

ON DMSO D:\ abar

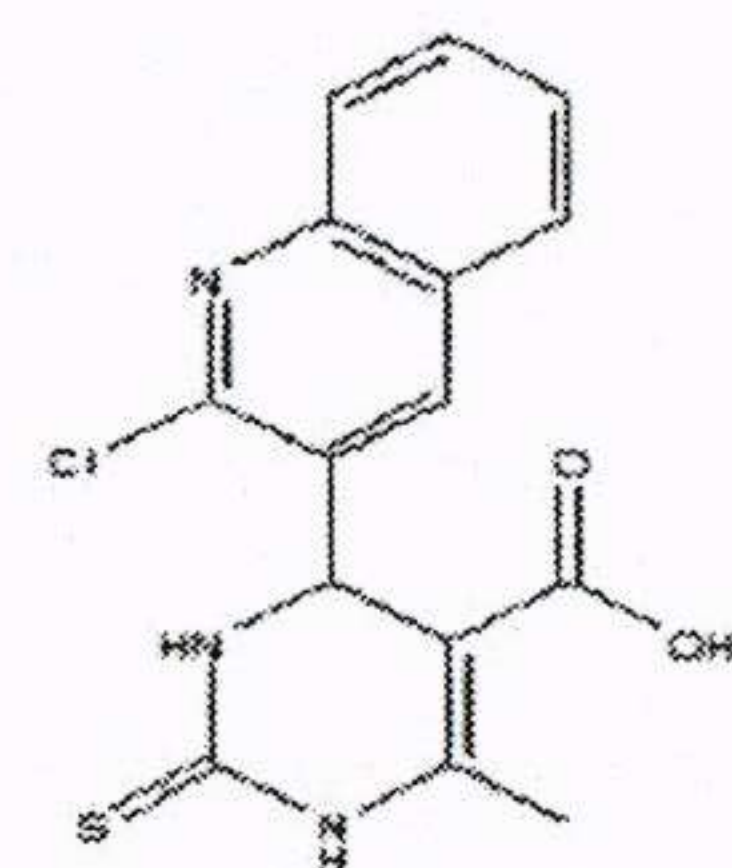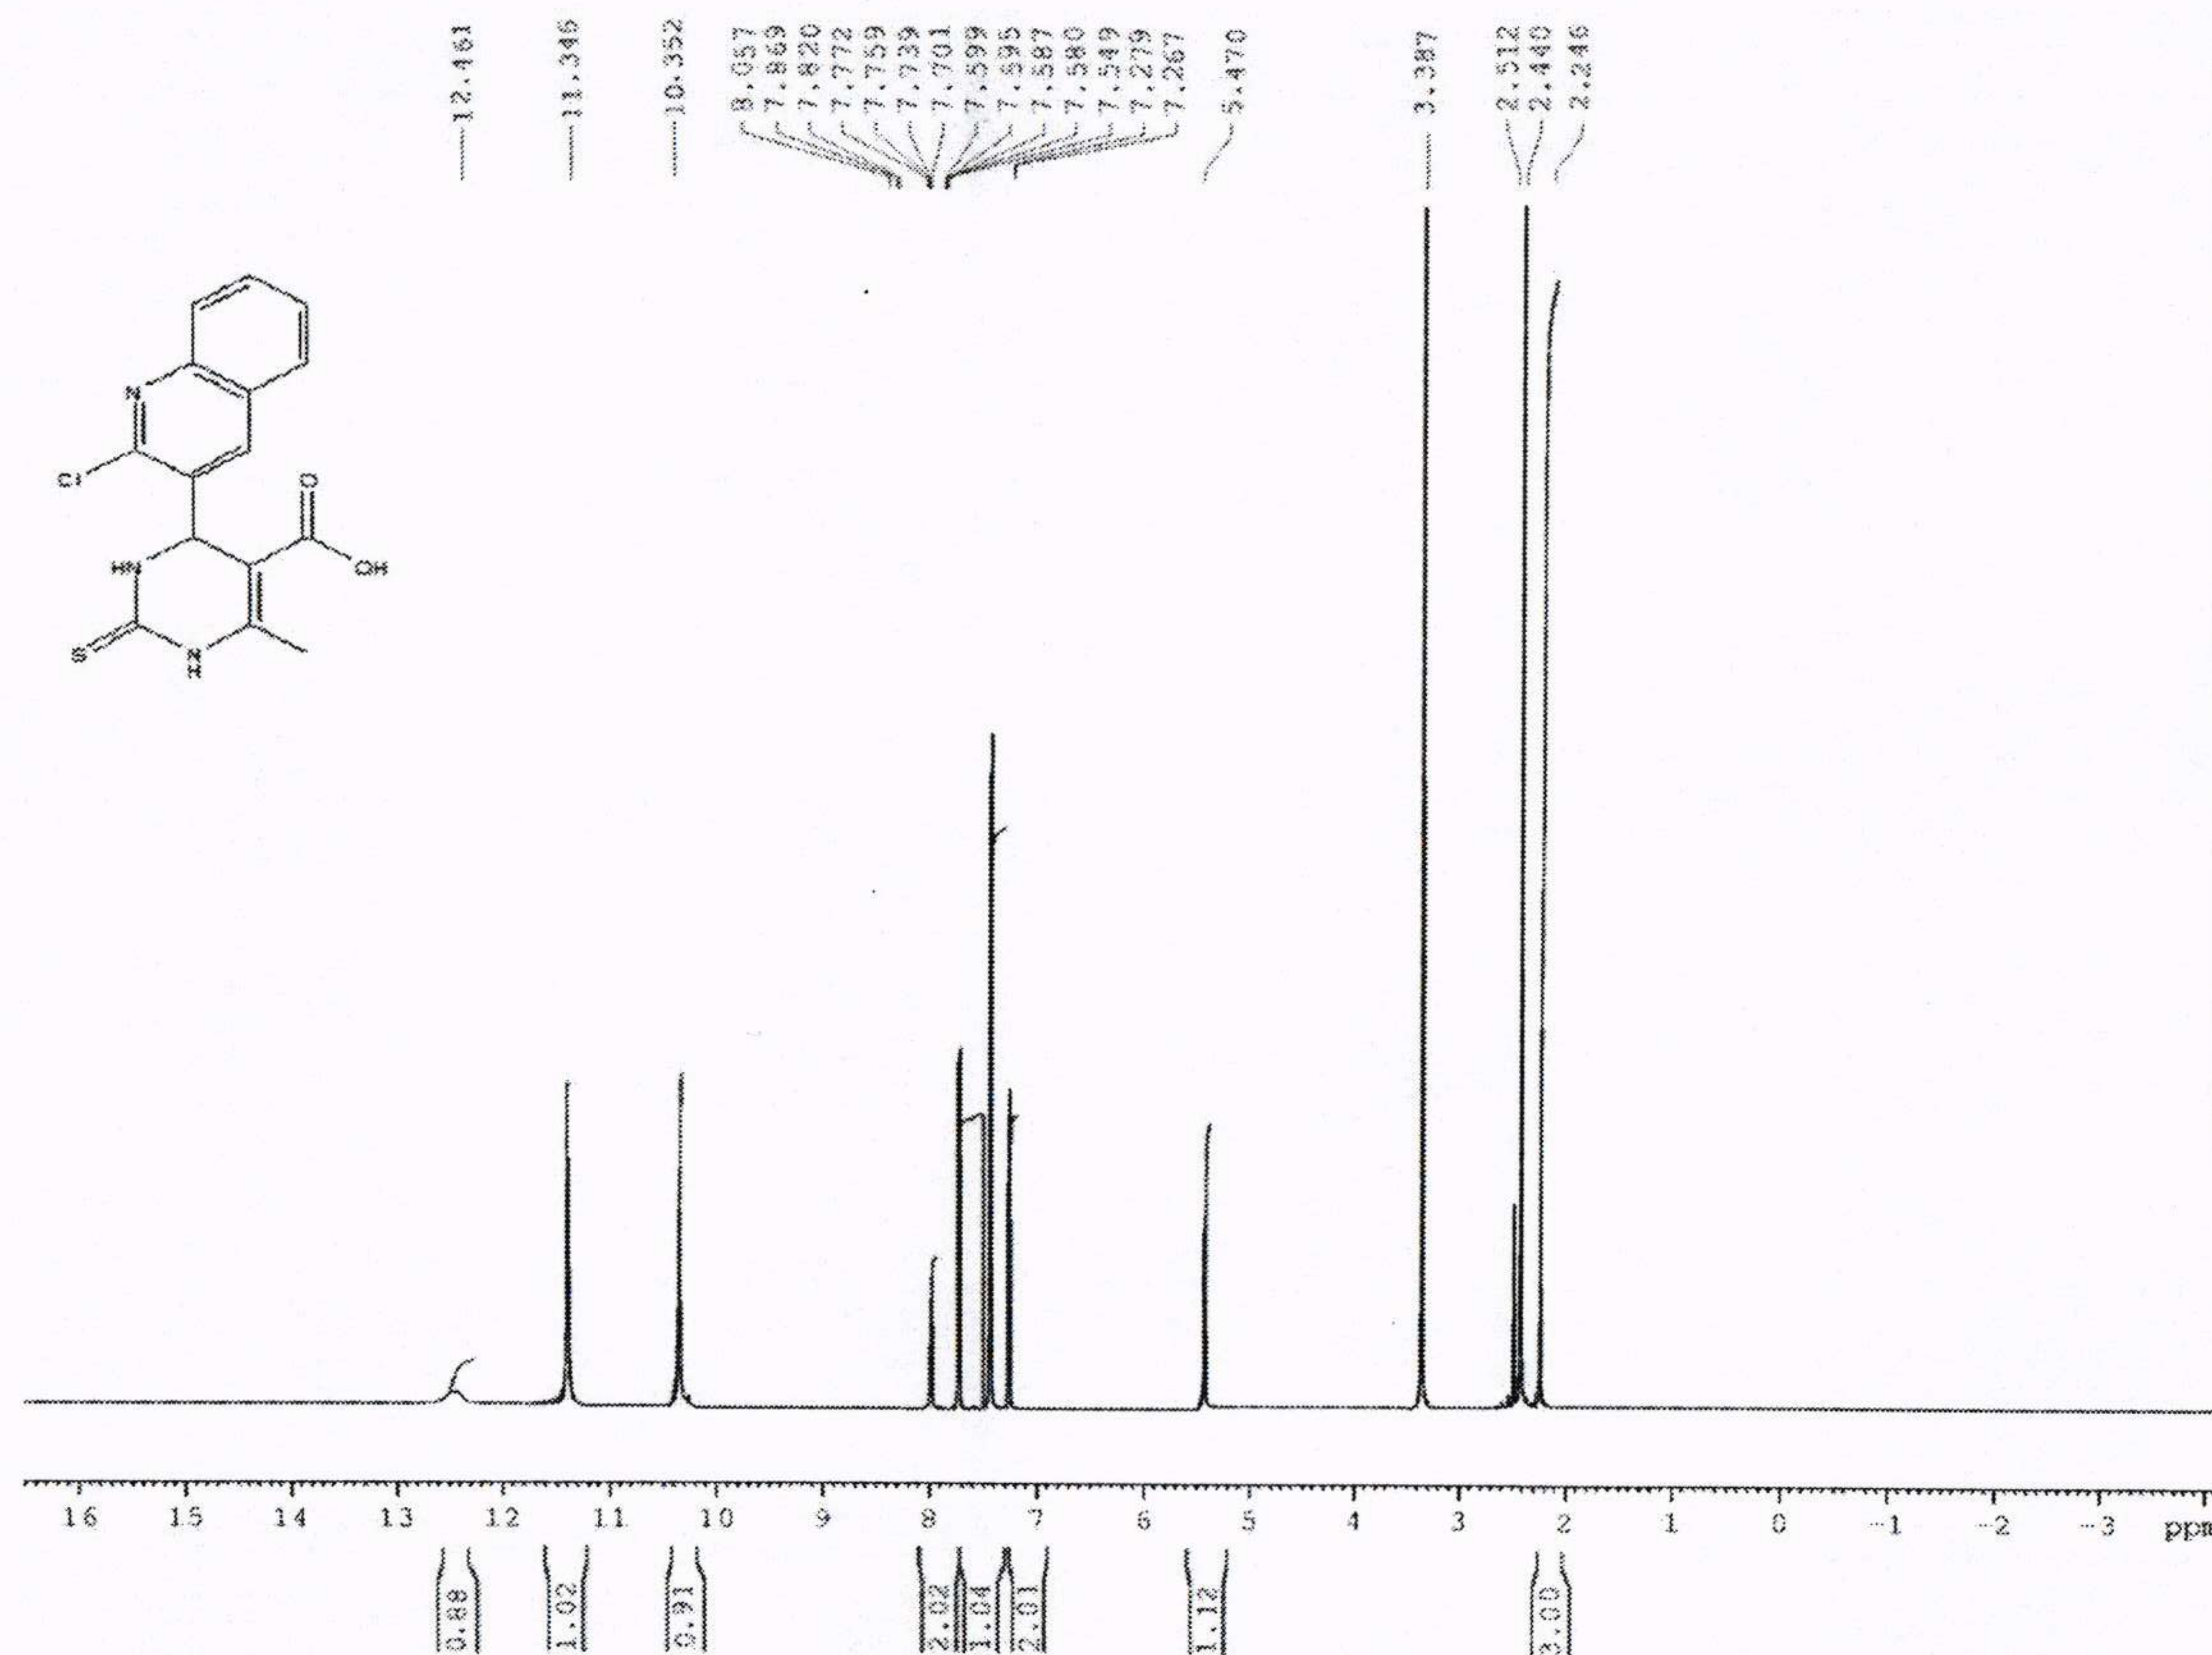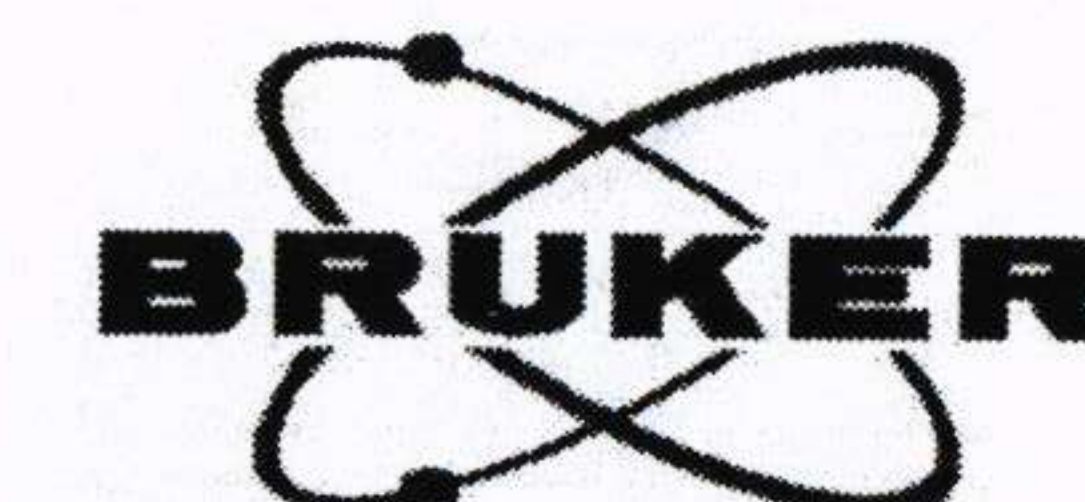

NAME drshahat-4  
EXPNO 10  
PROCNO 1  
Date\_ 20210624  
Time 18.59  
INSTRUM spect  
PROBHD 5 mm PABBO BB-  
PULPROG zg30  
TD 65536  
SOLVENT DMSO  
NS 16  
DS 2  
SWH 10330.578 Hz  
FIDRES 0.157632 Hz  
AQ 3.1720407 sec  
RG 90.5  
DW 48.400 usec  
DE 6.50 usec  
TE 298.3 K  
D1 1.00000000 sec  
TD0 1

----- CHANNEL f1 -----  
NUC1 1H  
P1 14.70 usec  
PL1 -1.10 dB  
SFO1 500.1330885 MHz  
SI 32768  
SF 500.1300000 MHz  
WDW EM  
SSB 0  
LB 0.30 Hz  
GB 0  
PC 1.00

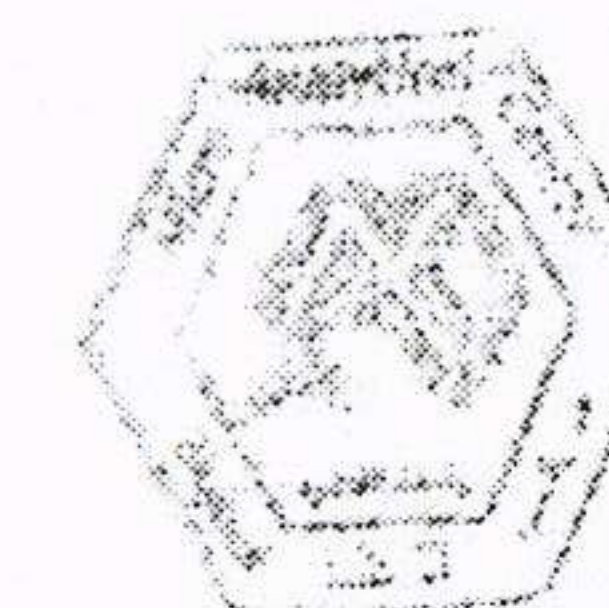



C13CPD32 DMSO D:\\ abari 45

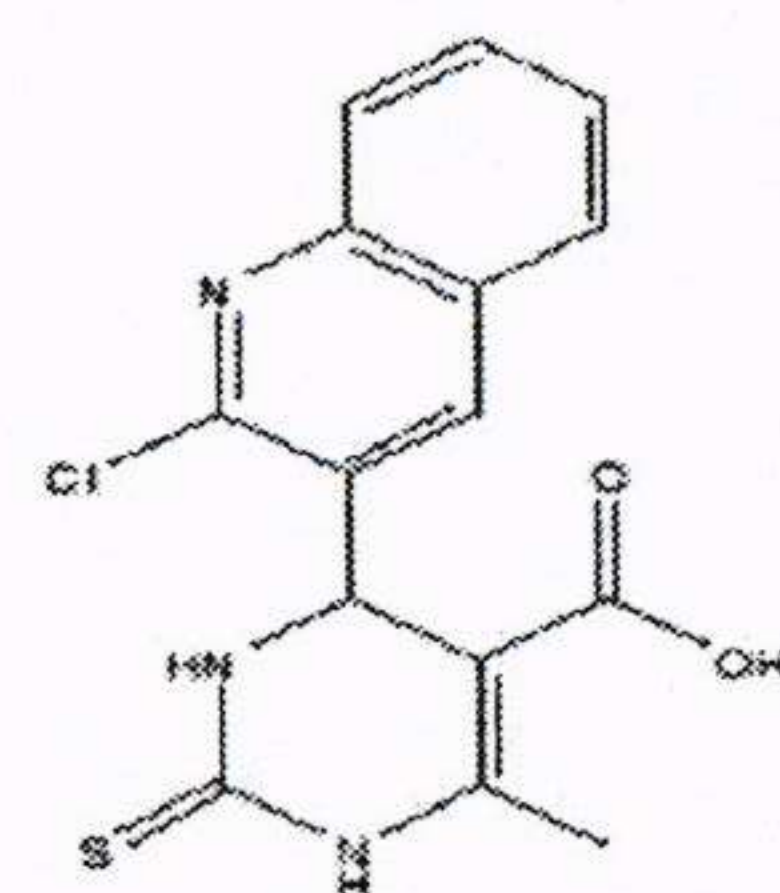

5b

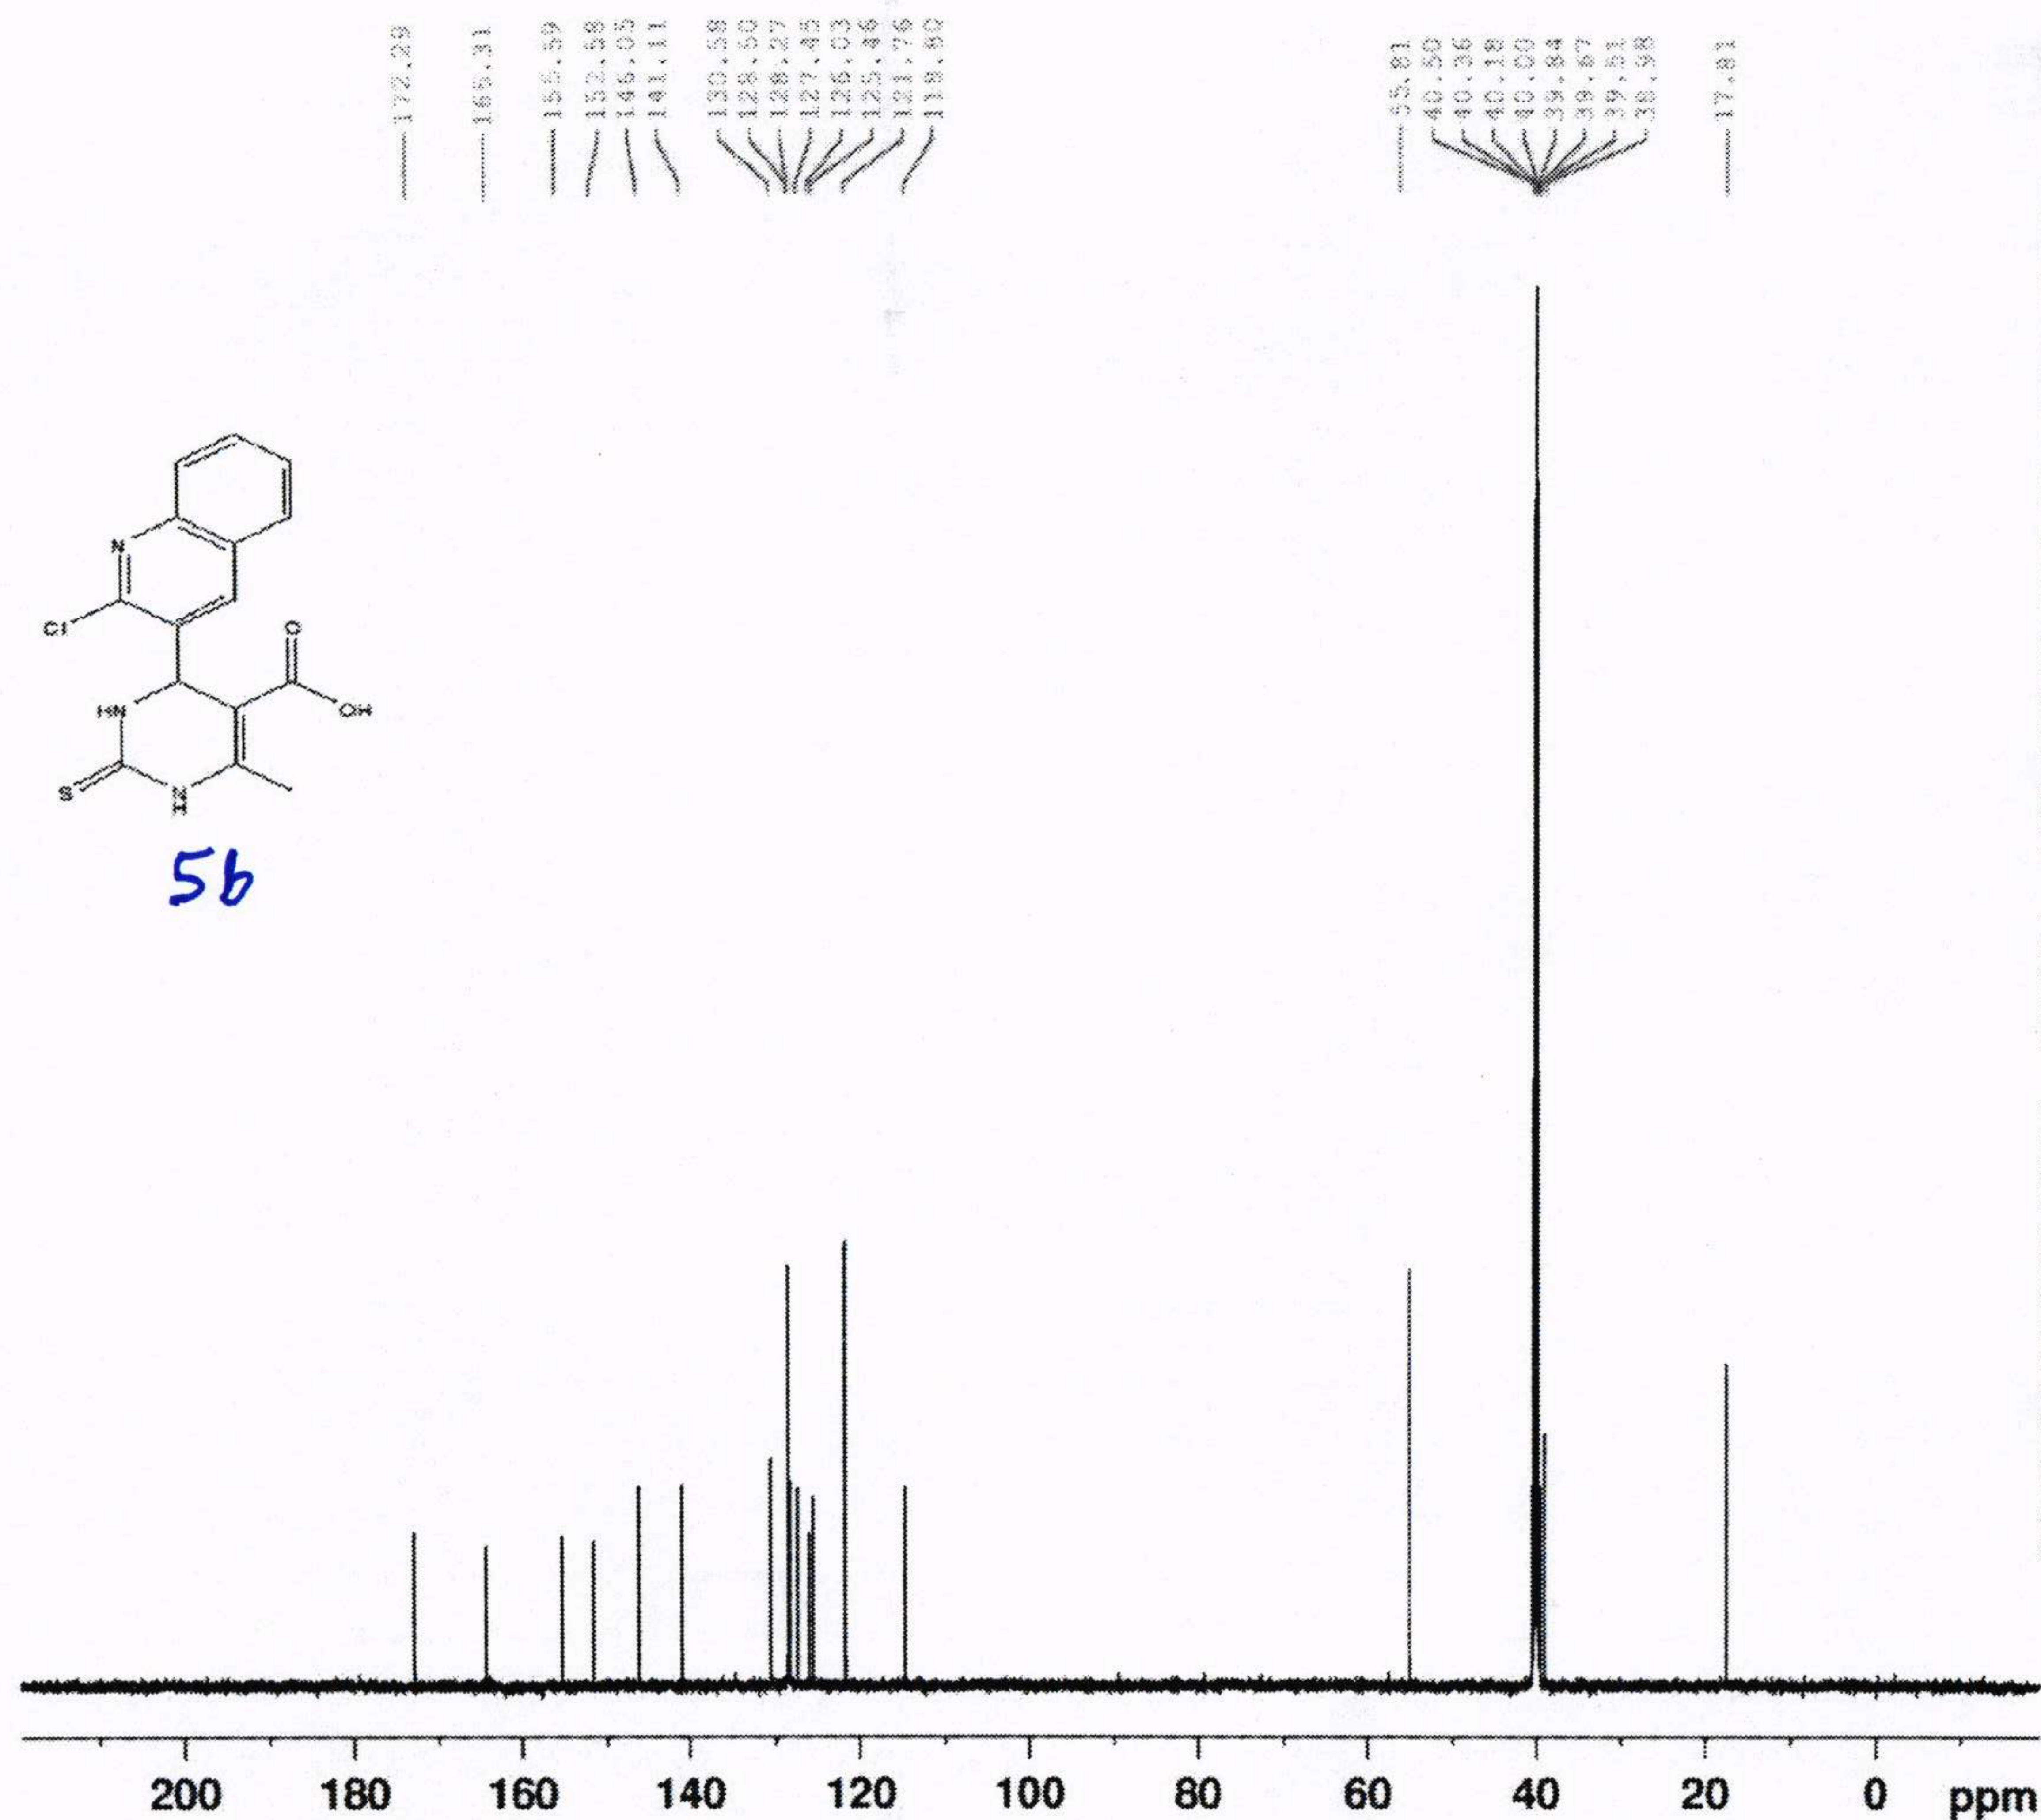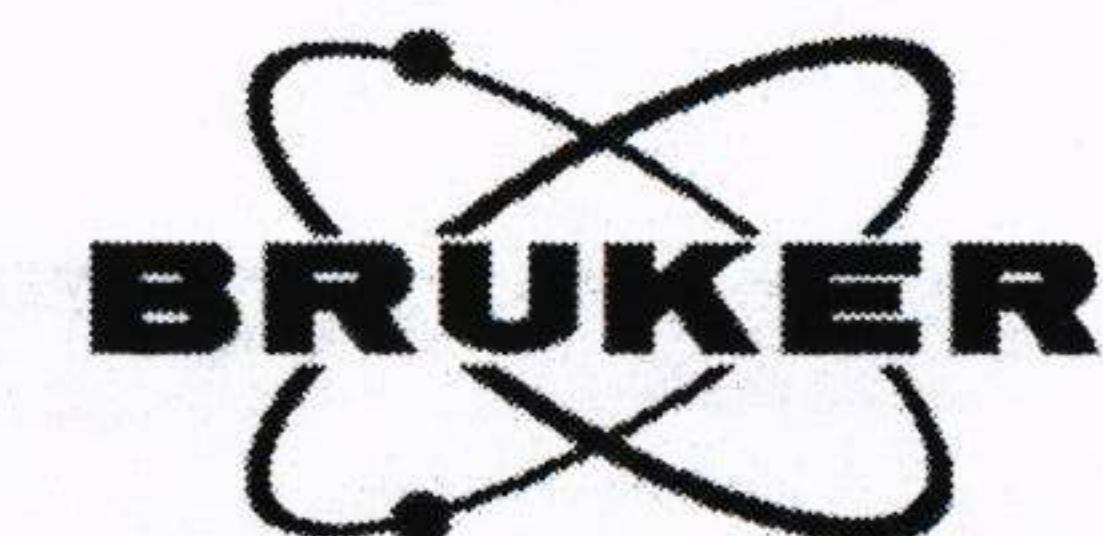

NAME drshahat-4  
 EXPNO 11  
 PROCNO 1  
 Date\_ 20210624  
 Time 13.45  
 INSTRUM spect  
 PROBHD 5 mm PABBO BB-  
 PULPROG zgpg30  
 TD 65536  
 SOLVENT DMSO  
 NS 1104  
 DS 2  
 SWH 30030.029 Hz  
 FIDRES 0.458222 Hz  
 AQ 1.0912410 sec  
 RG 2048  
 DW 16.650 usec  
 DE 6.50 usec  
 TE 299.0 K  
 D1 2.00000000 sec  
 D11 0.03000000 sec  
 TDO 1

===== CHANNEL f1 =====  
 NUC1 13C  
 P1 20.00 usec  
 PL1 -6.00 dB  
 SFO1 125.7703643 MHz

===== CHANNEL f2 =====  
 CPDPRG2 waltz16  
 NUC2 1H  
 PCPD2 80.00 usec  
 PL2 -1.10 dB  
 PL12 13.44 dB  
 PL13 16.40 dB  
 SFO2 500.1320005 MHz  
 SI 32768  
 SF 125.7577890 MHz  
 WDW EM  
 SSB 0  
 LB 1.00 Hz  
 GB 0  
 PC 1.40

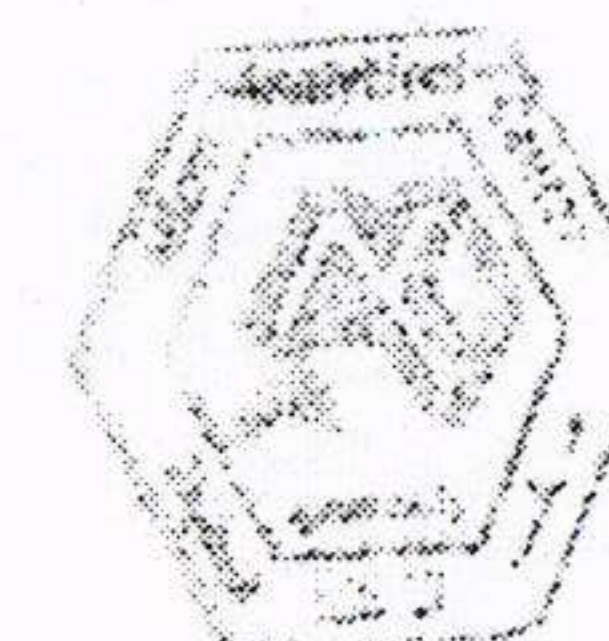



4-(1,3-Diphenyl-1H-pyrazol-4-yl)-6-methyl-2-thioxo-1,2,3,4-tetrahydropyrimidine-5-carboxylic acid

5c

ON DMSO D:\ abar

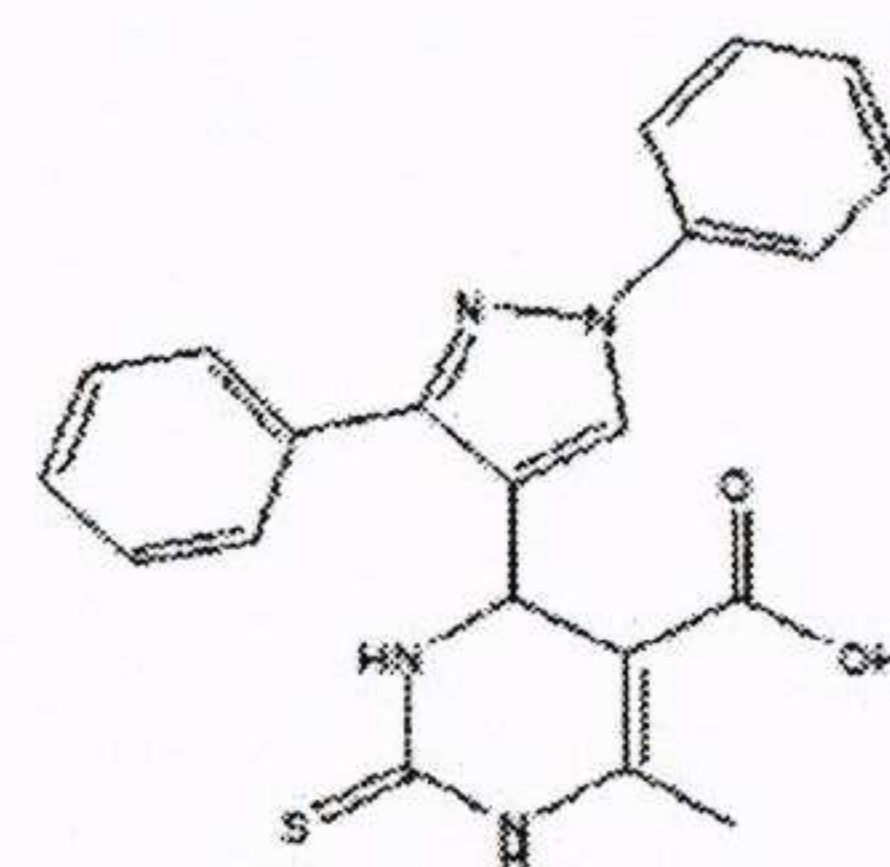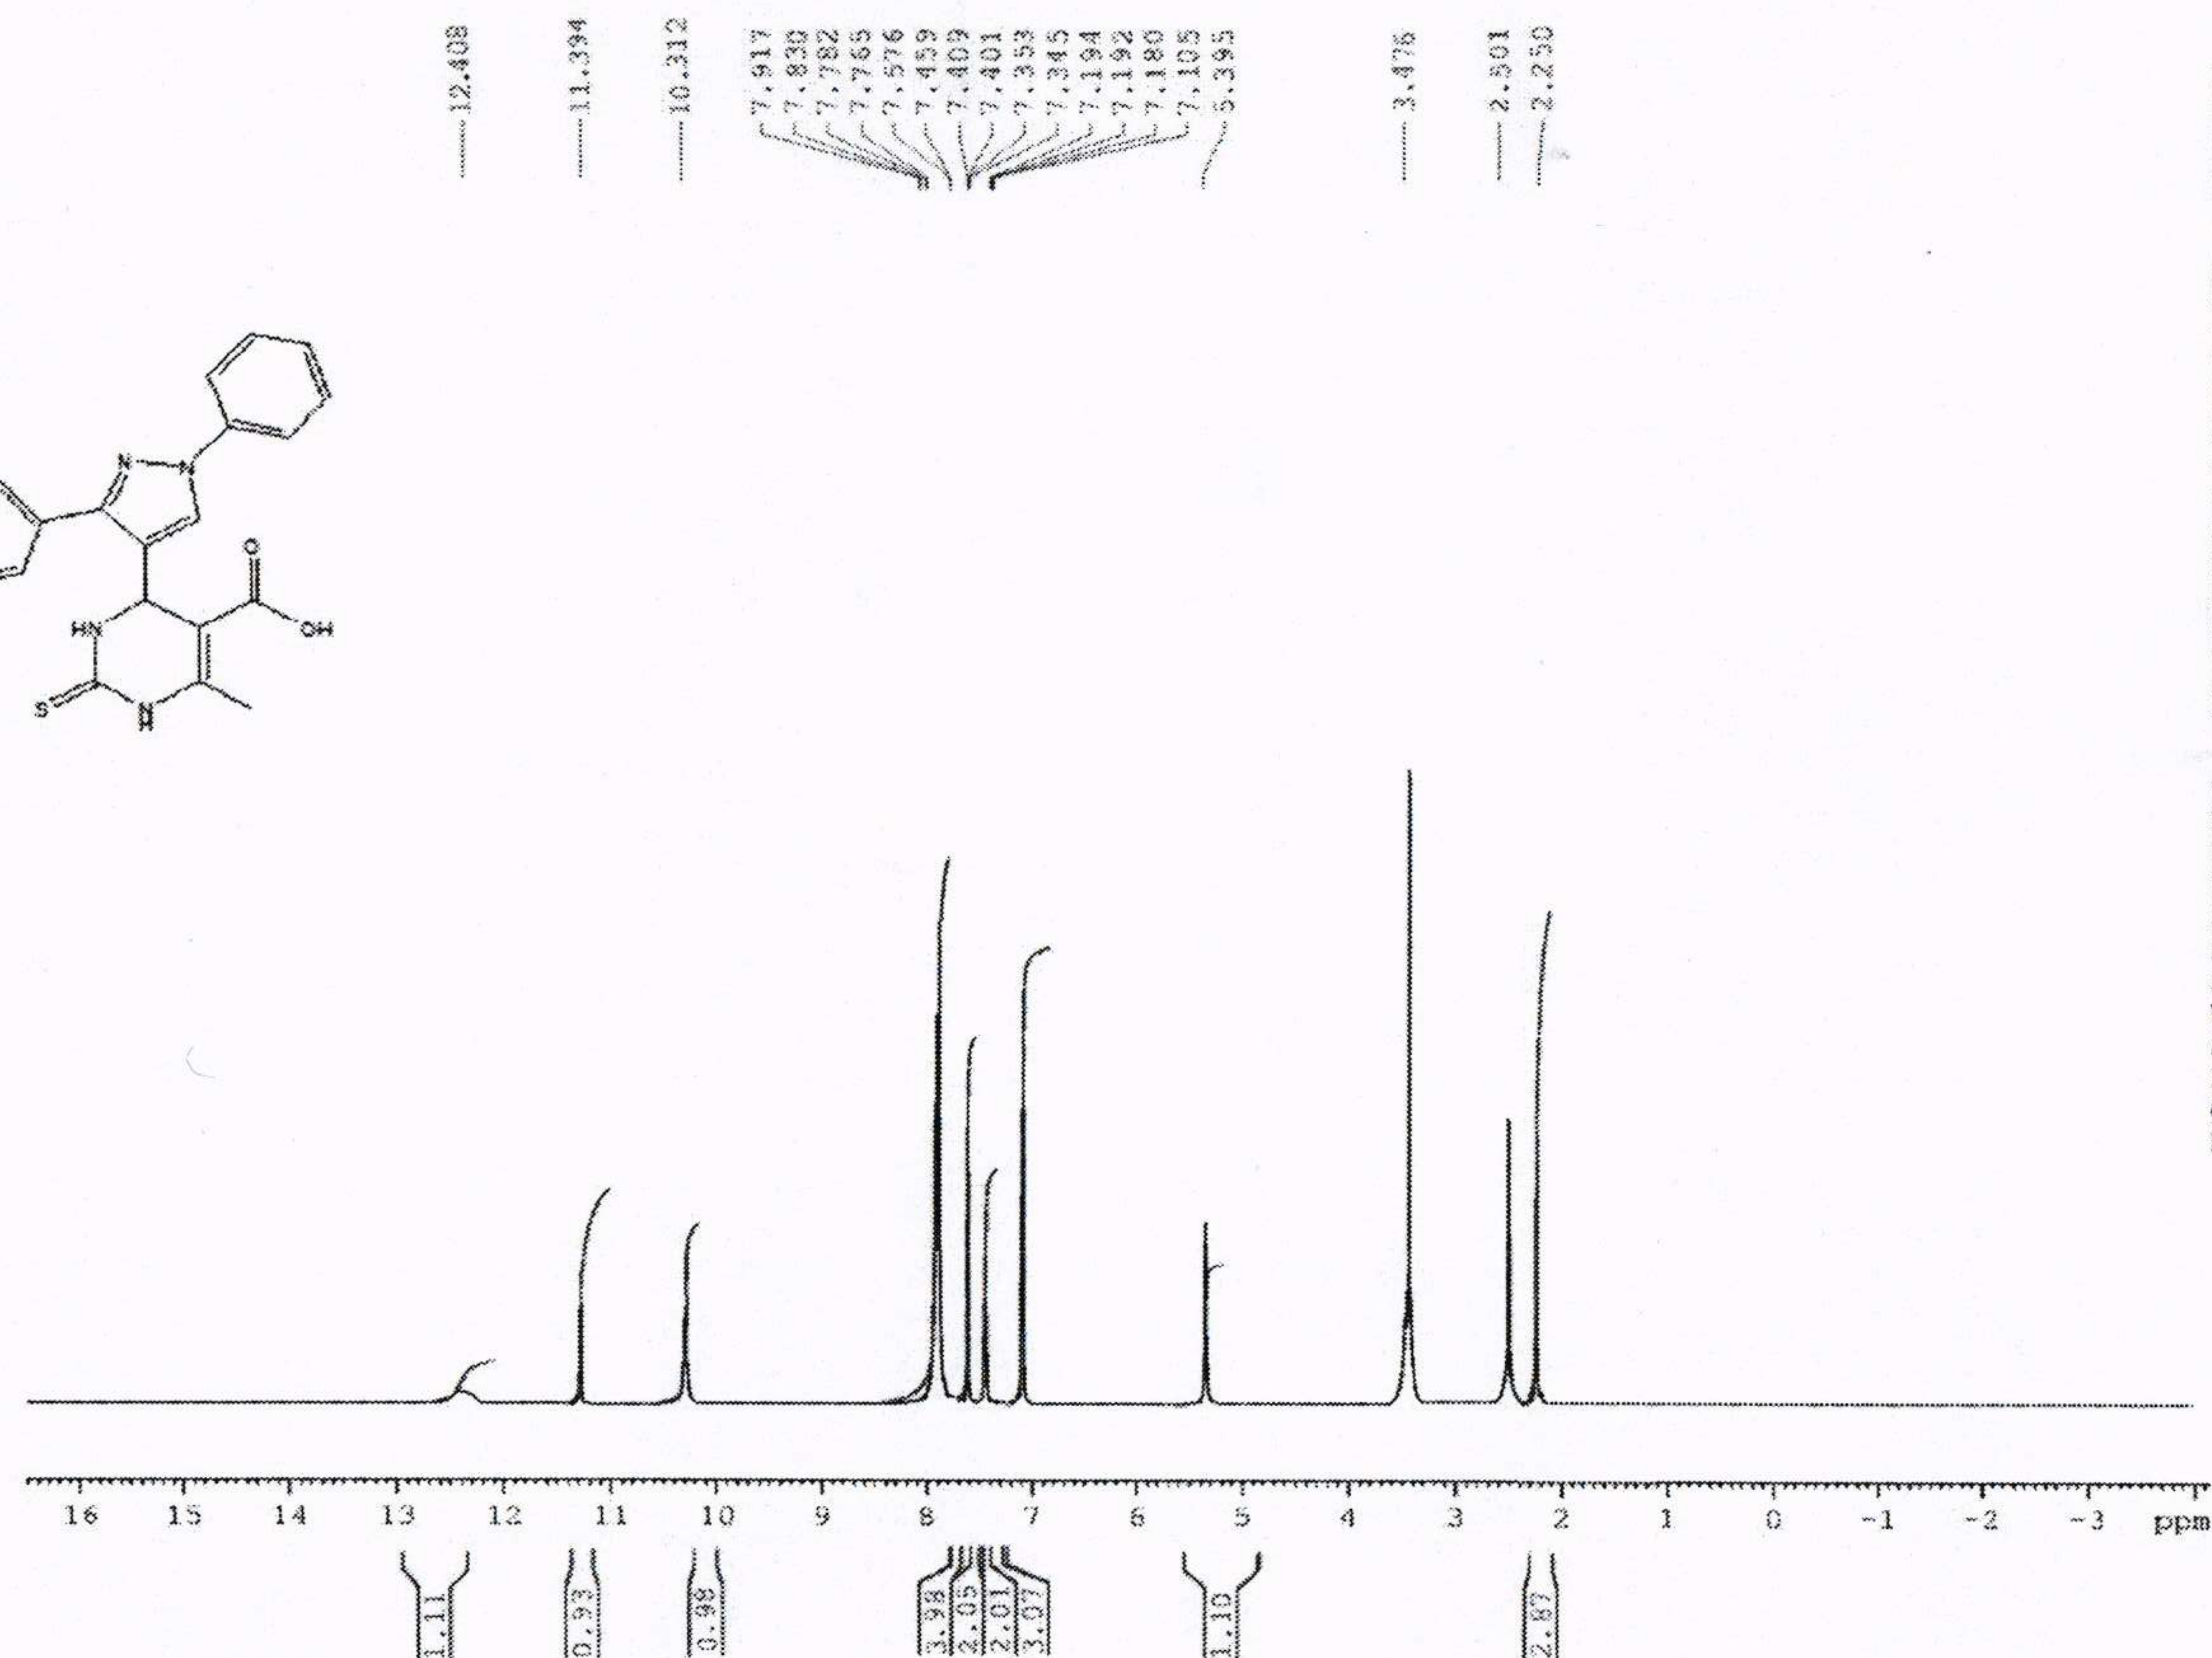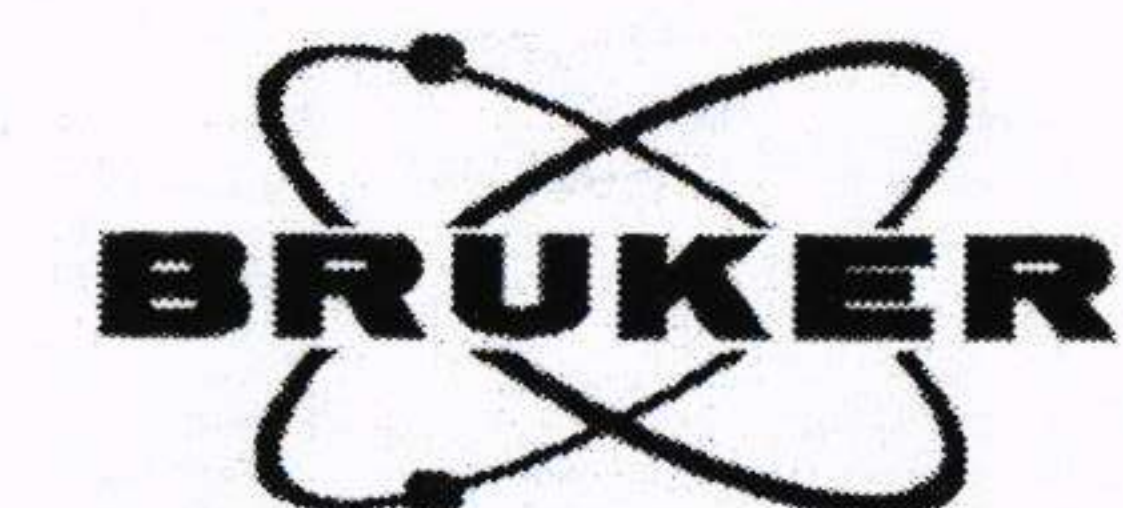

NAME dirshahat-6  
EXPNO 10  
PROCNO 1  
Date\_ 20210624  
Time 11.17  
INSTRUM spect  
PROBHD 5 mm PABBO BB-  
PULPROG zg30  
TD 65536  
SOLVENT DMSO  
NS 16  
DS 2  
SWH 10330.578 Hz  
FIDRES 0.157632 Hz  
AQ 3.1720407 sec  
RG 128  
DW 48.400 usec  
DE 6.50 usec  
TE 298.3 K  
D1 1.00000000 sec  
TD0 1

===== CHANNEL f1 =====  
NUC1 1H  
P1 14.70 usec  
PL1 -1.10 dB  
SFO1 500.1330885 MHz  
SI 32768  
SF 500.1300000 MHz  
WDW EM  
SSB 0  
LB 0.30 Hz  
GB 0  
PC 1.00

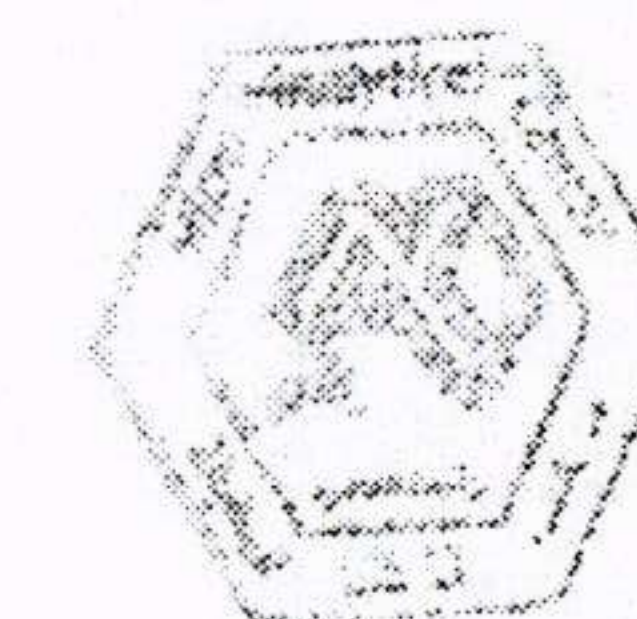



C13CPD32 DMSO D:\\ abari 44

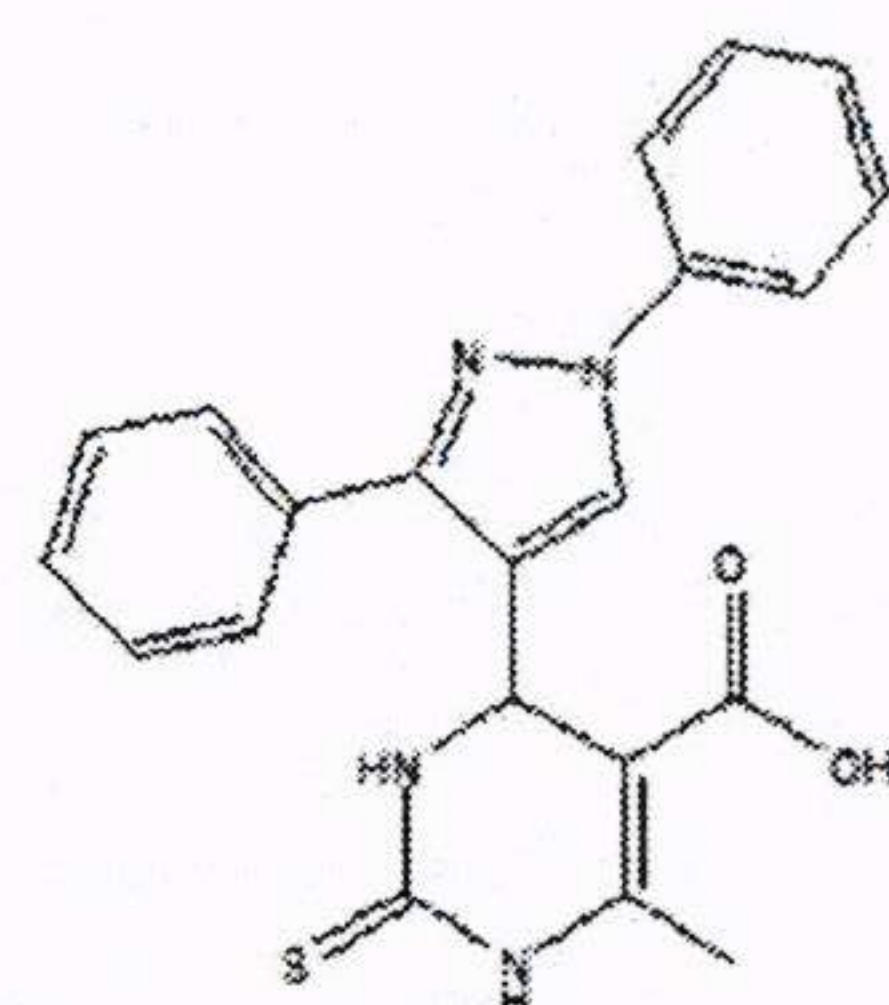

5c

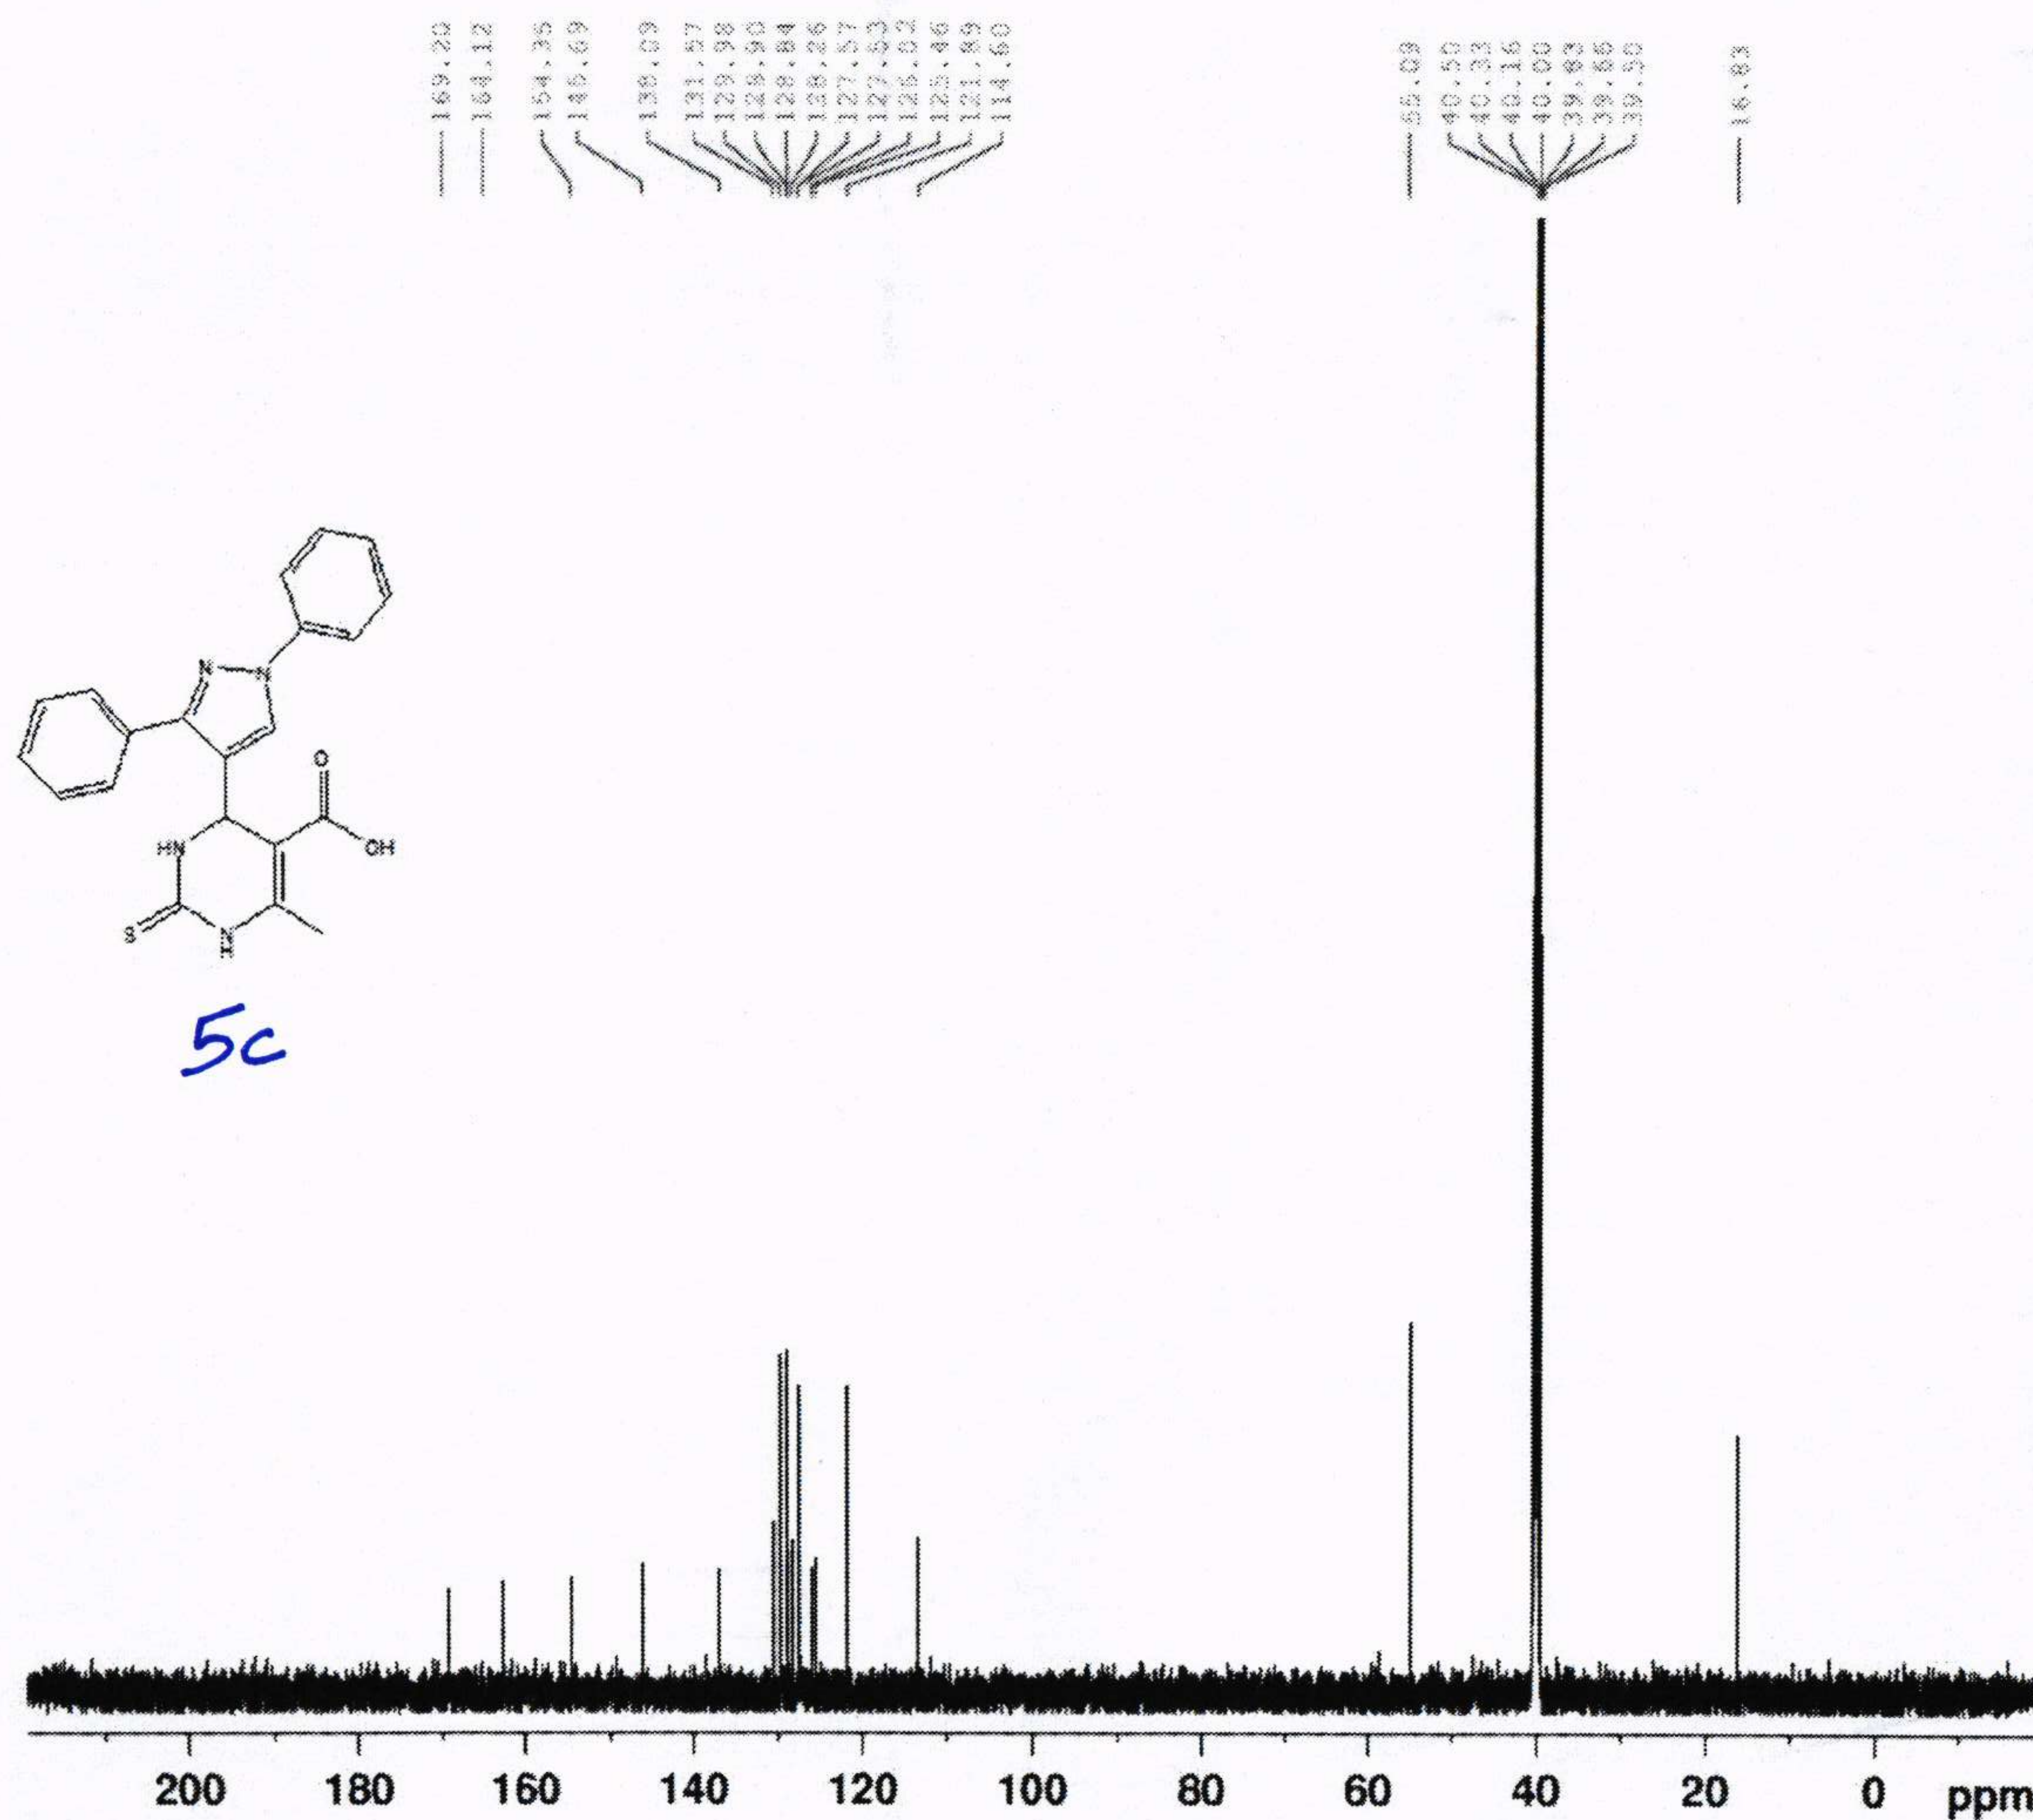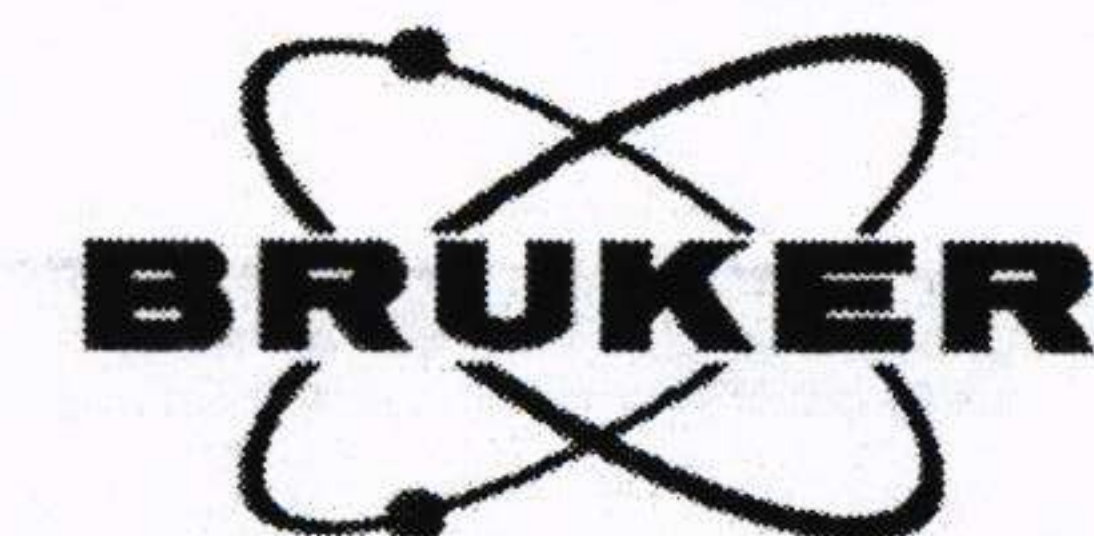

NAME drshahat-6  
 EXPNO 11  
 PROCNO 1  
 Date\_ 20210624  
 Time 12.07  
 INSTRUM spect  
 PROBHD 5 mm PABBO BB-  
 PULPROG zgpg30  
 TD 65536  
 SOLVENT DMSO  
 NS 1165  
 DS 2  
 SWH 30030.029 Hz  
 FIDRES 0.458222 Hz  
 AQ 1.0912410 sec  
 RG 4597.6  
 DW 16.650 usec  
 DE 6.50 usec  
 TE 299.2 K  
 D1 2.00000000 sec  
 D11 0.03000000 sec  
 TD0 1

===== CHANNEL f1 =====  
 NUC1 13C  
 P1 20.00 usec  
 PL1 -6.00 dB  
 SFO1 125.7703643 MHz

===== CHANNEL f2 =====  
 CPDPRG2 waltz16  
 NUC2 1H  
 PCPD2 80.00 usec  
 PL2 -1.10 dB  
 PL12 13.44 dB  
 PL13 16.40 dB  
 SFO2 500.1320005 MHz  
 SI 32768  
 SF 125.7577890 MHz  
 WDW EM  
 SSB 0  
 LB 1.00 Hz  
 GB 0  
 PC 1.40

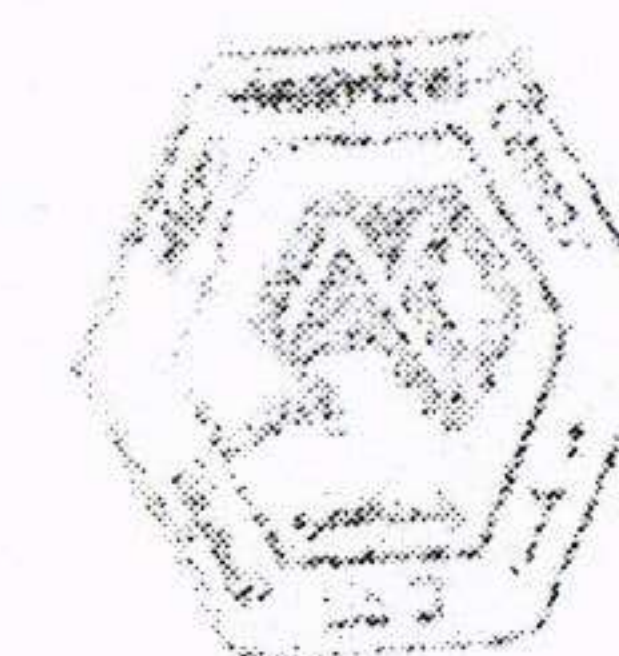



4-(1H-Indol-3-yl)-6-methyl-2-thioxo-1,2,3,4-tetrahydropyrimidine-5-carbonyl chloride

6a

DN DMSO D:\ abar

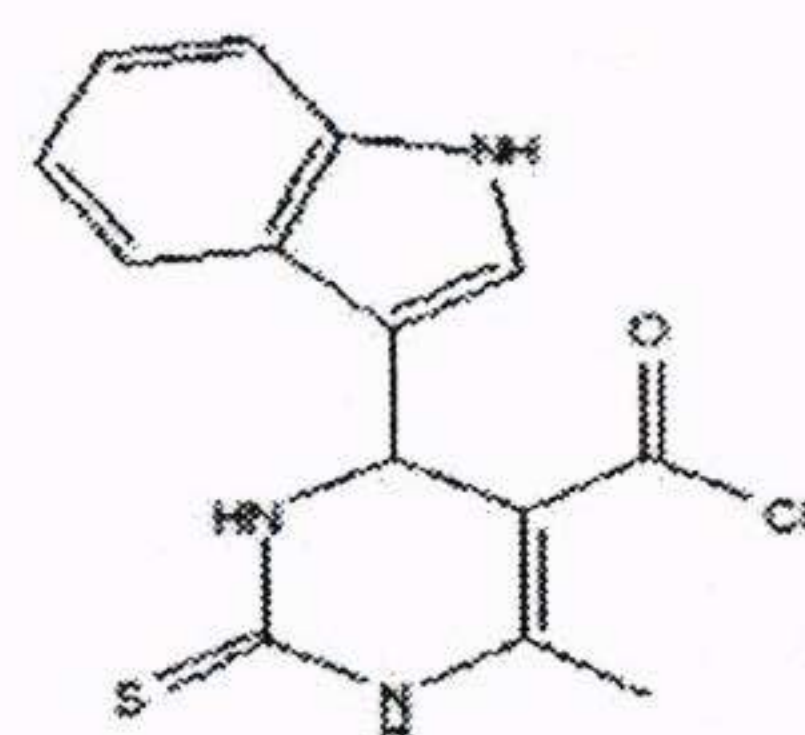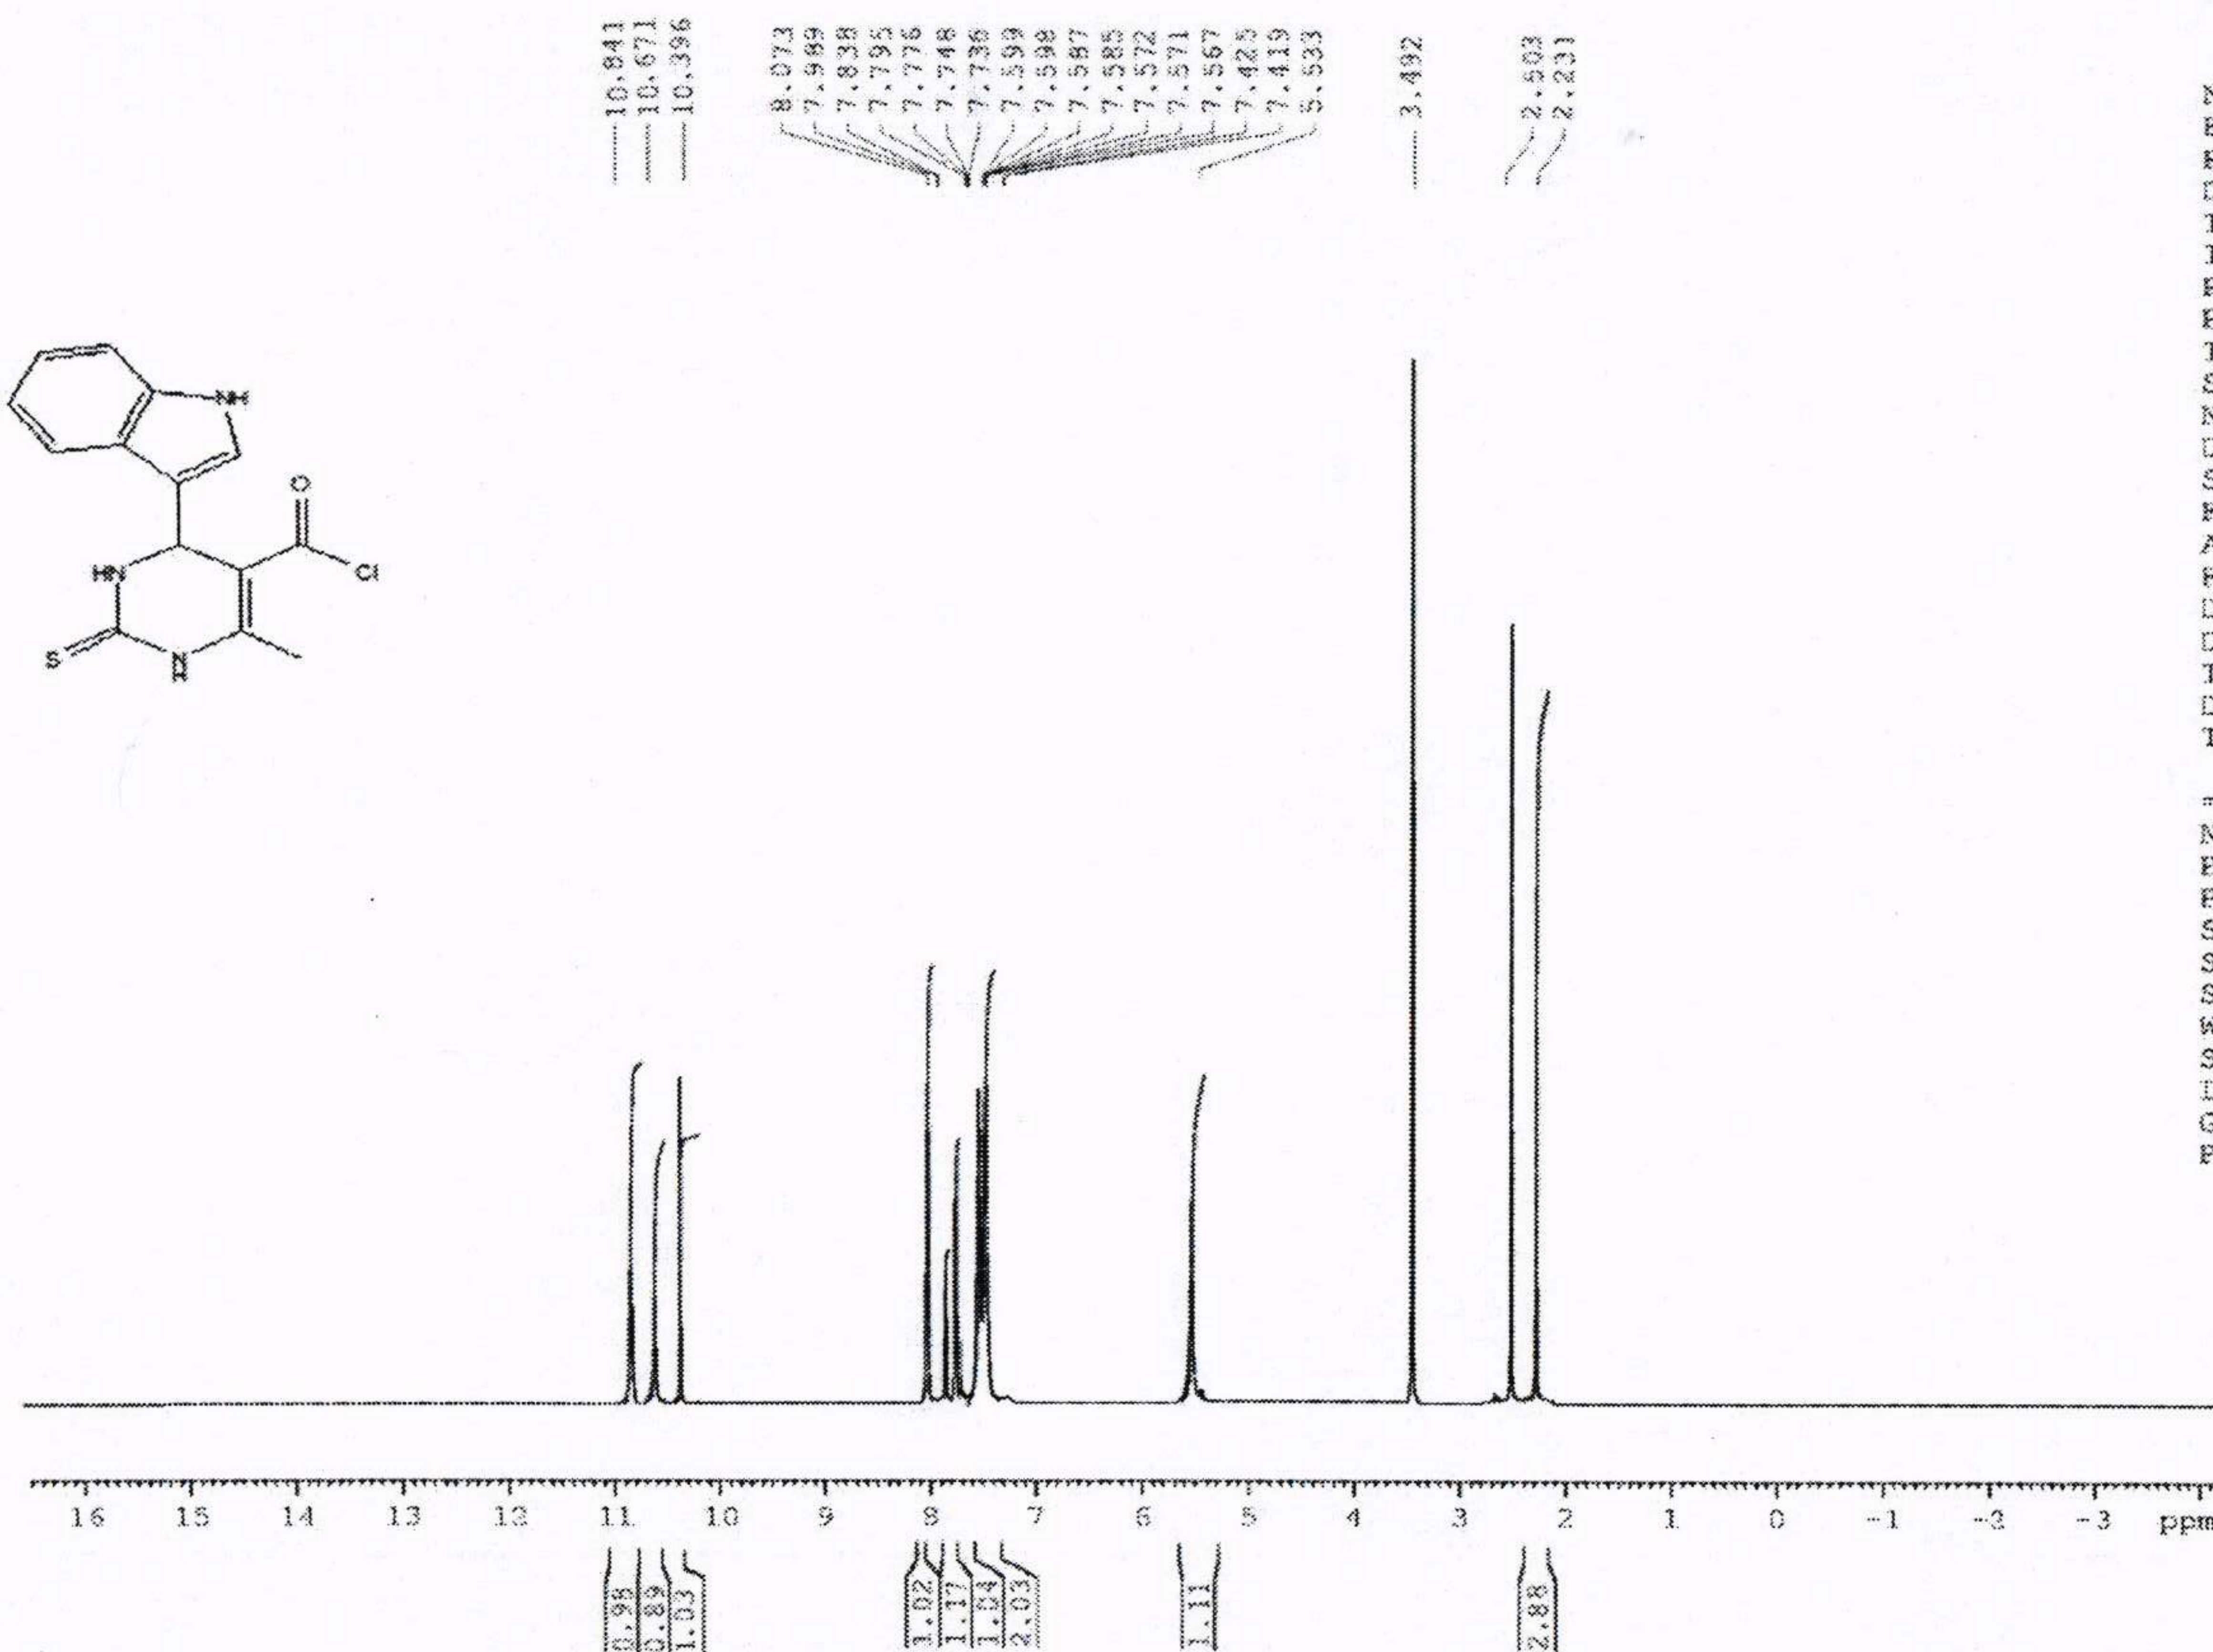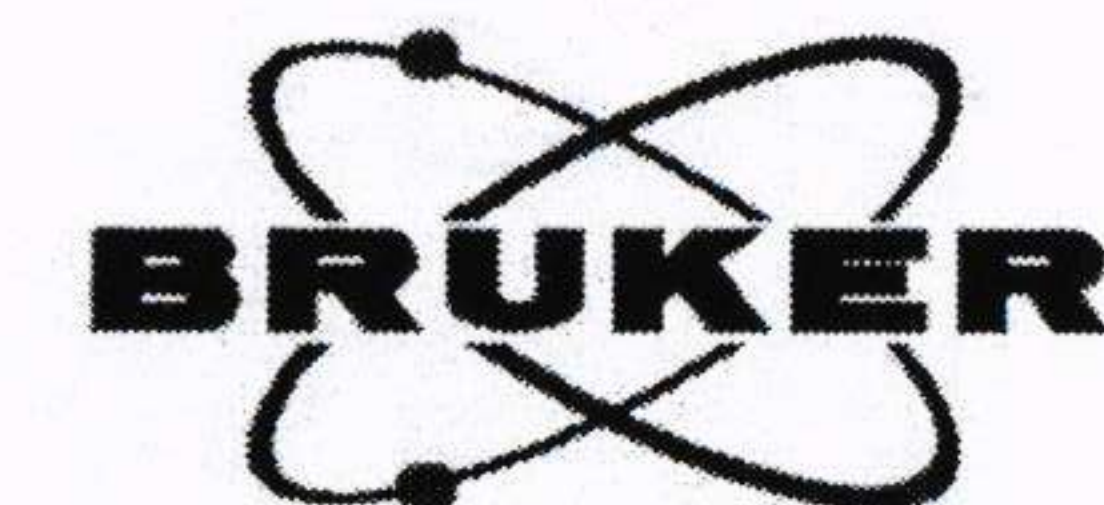

NAME drshahat-8  
EXPNO 10  
PROCNO 1  
Date\_ 20210625  
Time 18.59  
INSTRUM spect  
PROBHD 5 mm PABBO BB-  
PULPROG zg30  
TD 65536  
SOLVENT DMSO  
NS 16  
DS 2  
SWH 10330.578 Hz  
FIDRES 0.157632 Hz  
AQ 3.1720407 sec  
RG 90.5  
DW 48.400 usec  
DE 6.50 usec  
TE 298.3 K  
D1 1.00000000 sec  
TD0 1

===== CHANNEL f1 =====  
NUC1 1H  
P1 14.70 usec  
PL1 -1.10 dB  
SFO1 500.1330885 MHz  
SI 32768  
SF 500.1300000 MHz  
WDW EM  
SSB 0  
LB 0.30 Hz  
GB 0  
PC 1.00

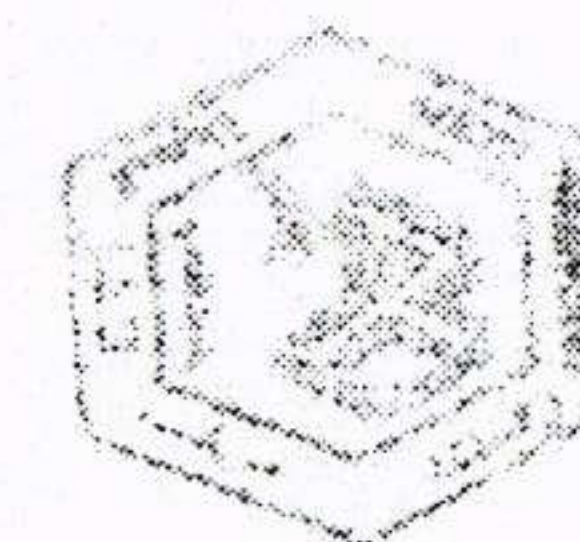



C13CPD32 DMSO D:\\ abari 46

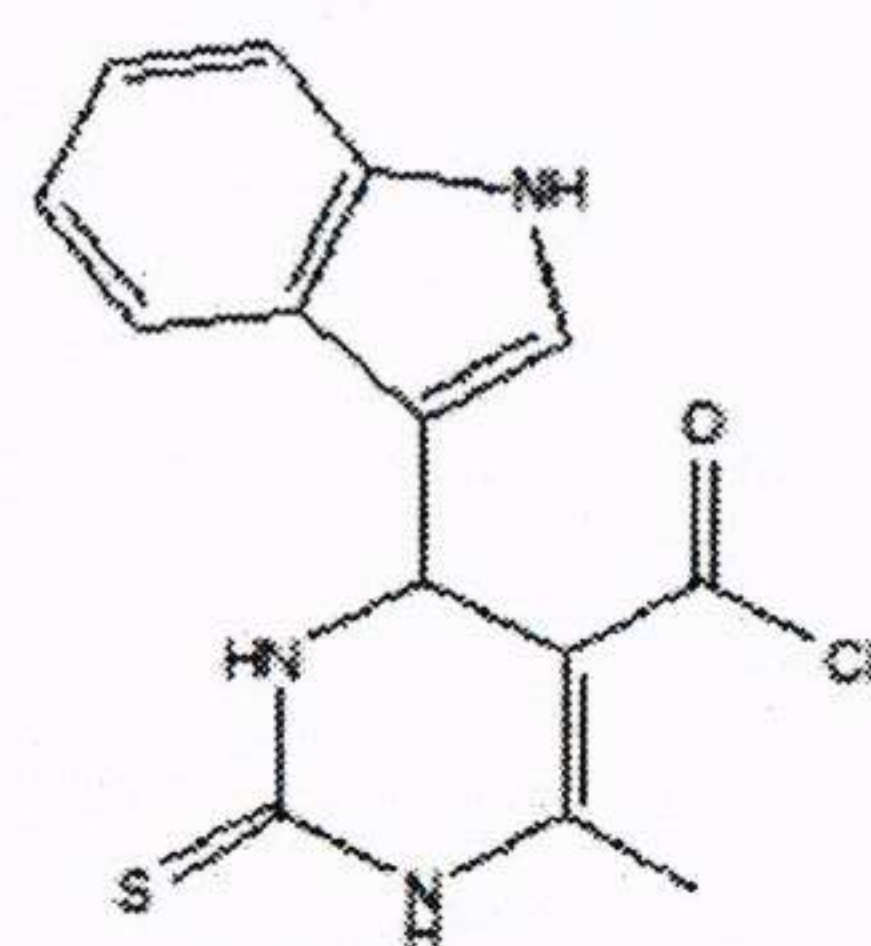

6a

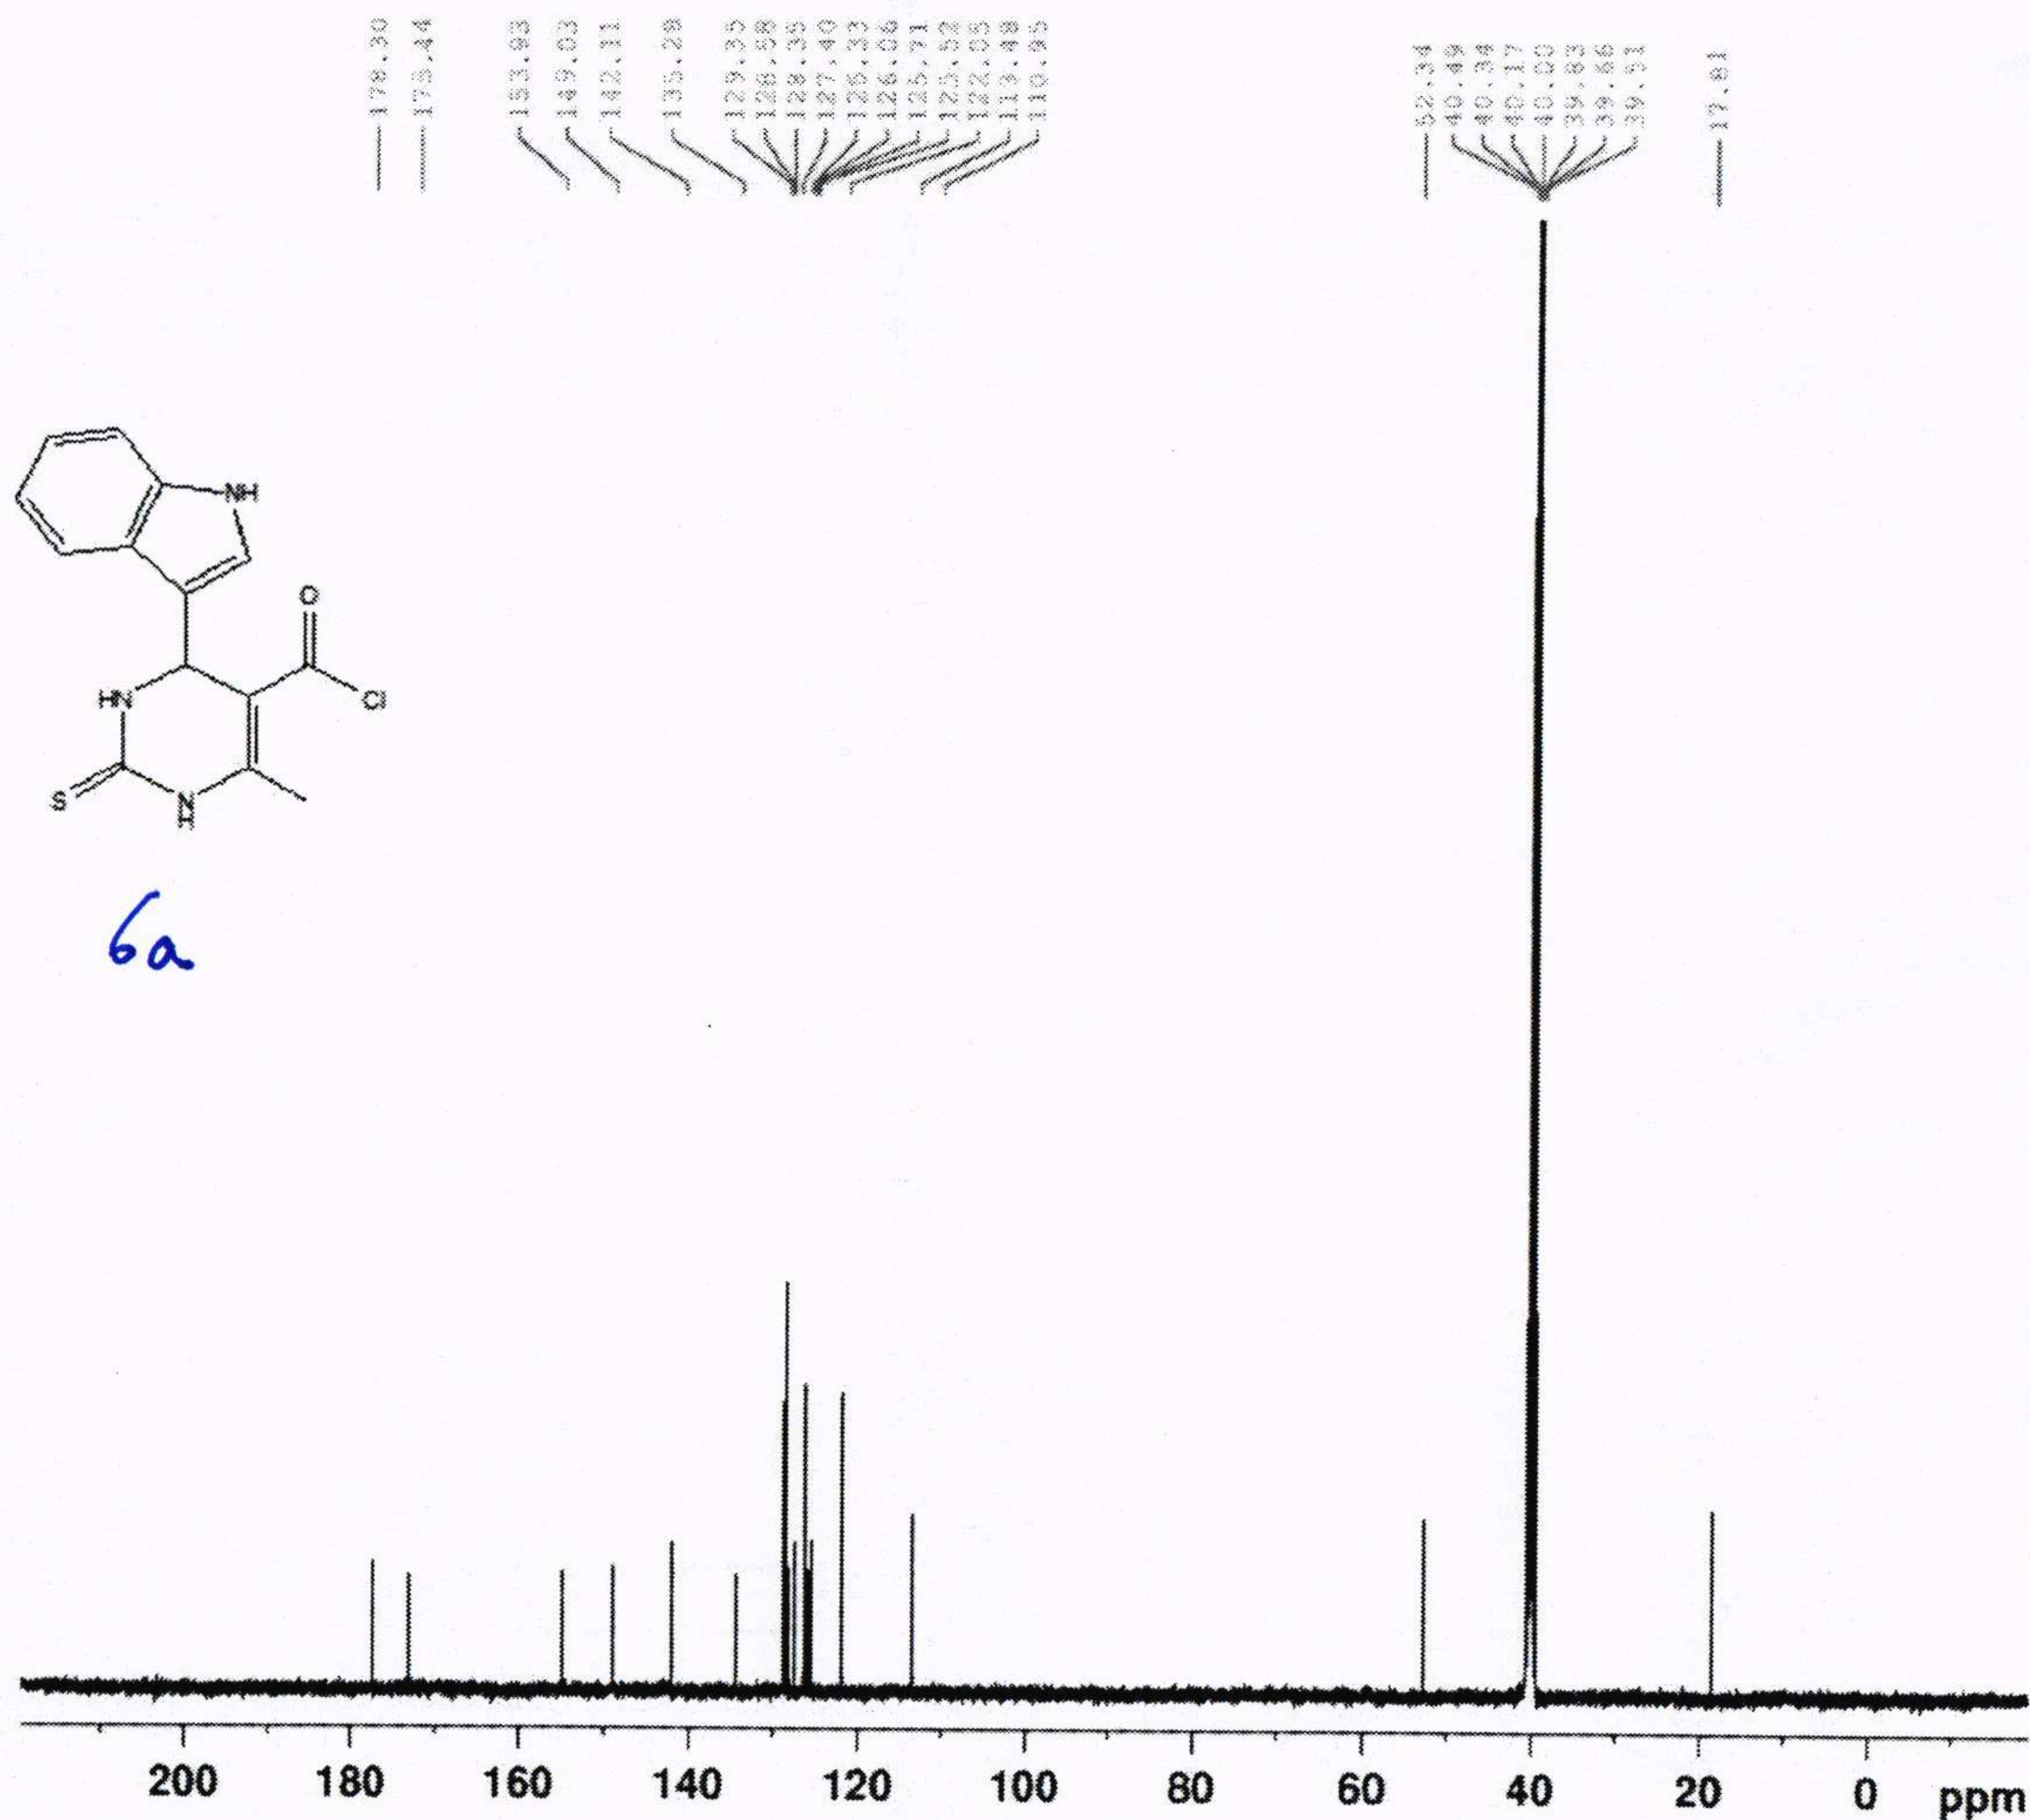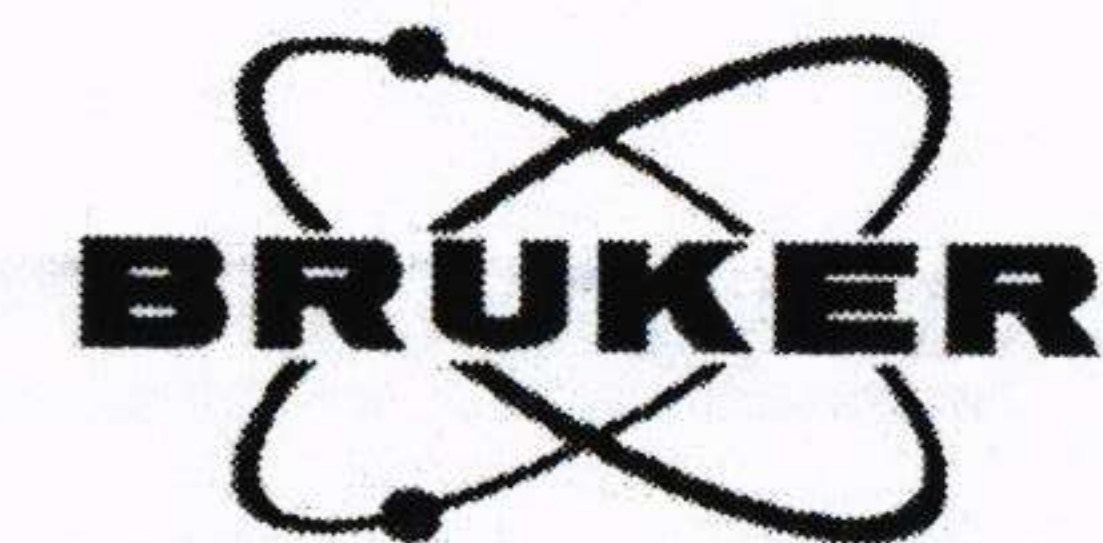

NAME drshahat-8  
 EXPNO 11  
 PROCNO 1  
 Date\_ 20210625  
 Time 20.47  
 INSTRUM spect  
 PROBHD 5 mm PABBO BB-  
 PULPROG zgpg30  
 TD 65536  
 SOLVENT DMSO  
 NS 2000  
 DS 2  
 SWH 30030.029 Hz  
 FIDRES 0.458222 Hz  
 AQ 1.0912410 sec  
 RG 14596.5  
 DW 16.650 usec  
 DE 6.50 usec  
 TE 299.1 K  
 D1 2.00000000 sec  
 D11 0.03000000 sec  
 TD0 1

===== CHANNEL f1 =====  
 NUC1 13C  
 P1 20.00 usec  
 PL1 -6.00 dB  
 SFO1 125.7703643 MHz

===== CHANNEL f2 =====  
 CPDPRG2 waltz16  
 NUC2 1H  
 PCPD2 80.00 usec  
 PL2 -1.10 dB  
 PL12 13.44 dB  
 PL13 16.40 dB  
 SFO2 500.1320005 MHz  
 SI 32768  
 SF 125.7577890 MHz  
 WDW EM  
 SSB 0  
 LB 1.00 Hz  
 GB 0  
 PC 1.40

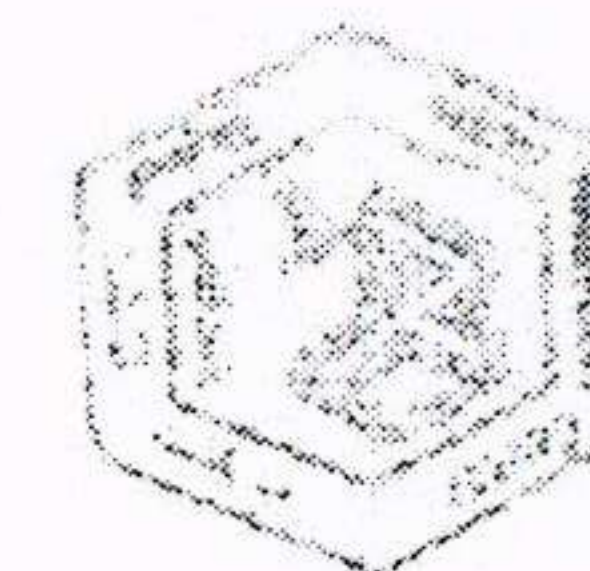



4-(2-Chloroquinolin-3-yl)-6-methyl-2-thioxo-1,2,3,4-tetrahydropyrimidine-5-carbonyl chloride

66

ON DMSO D:\ abar

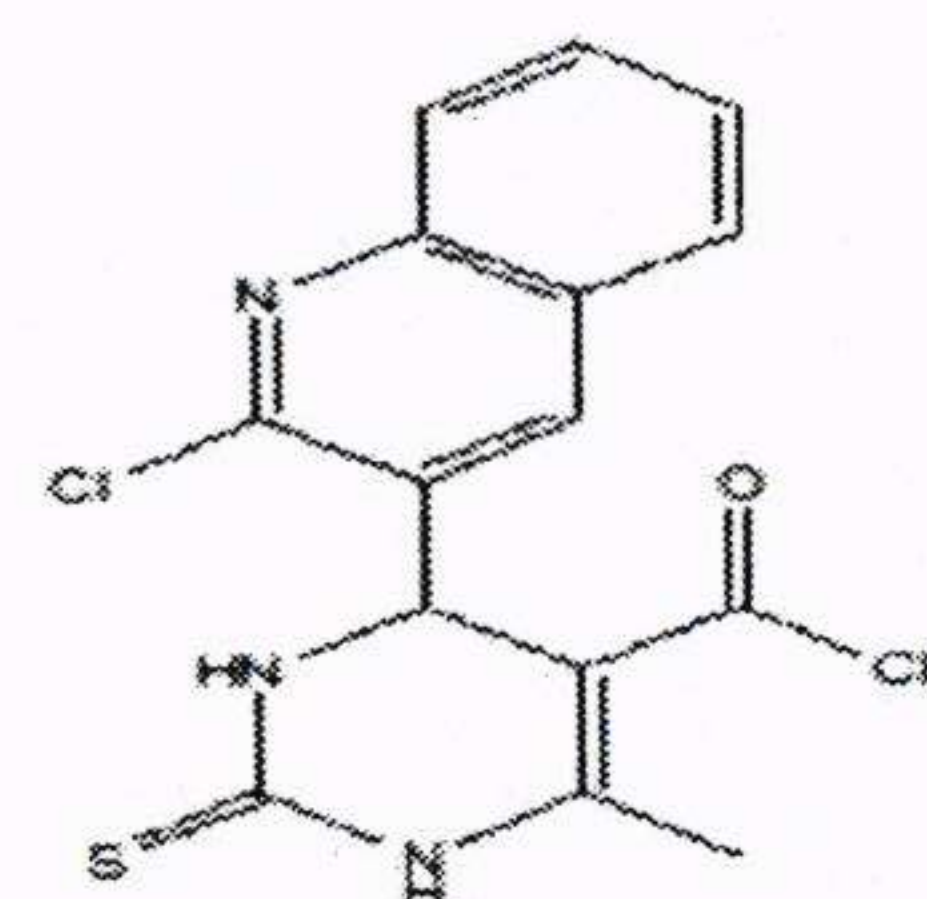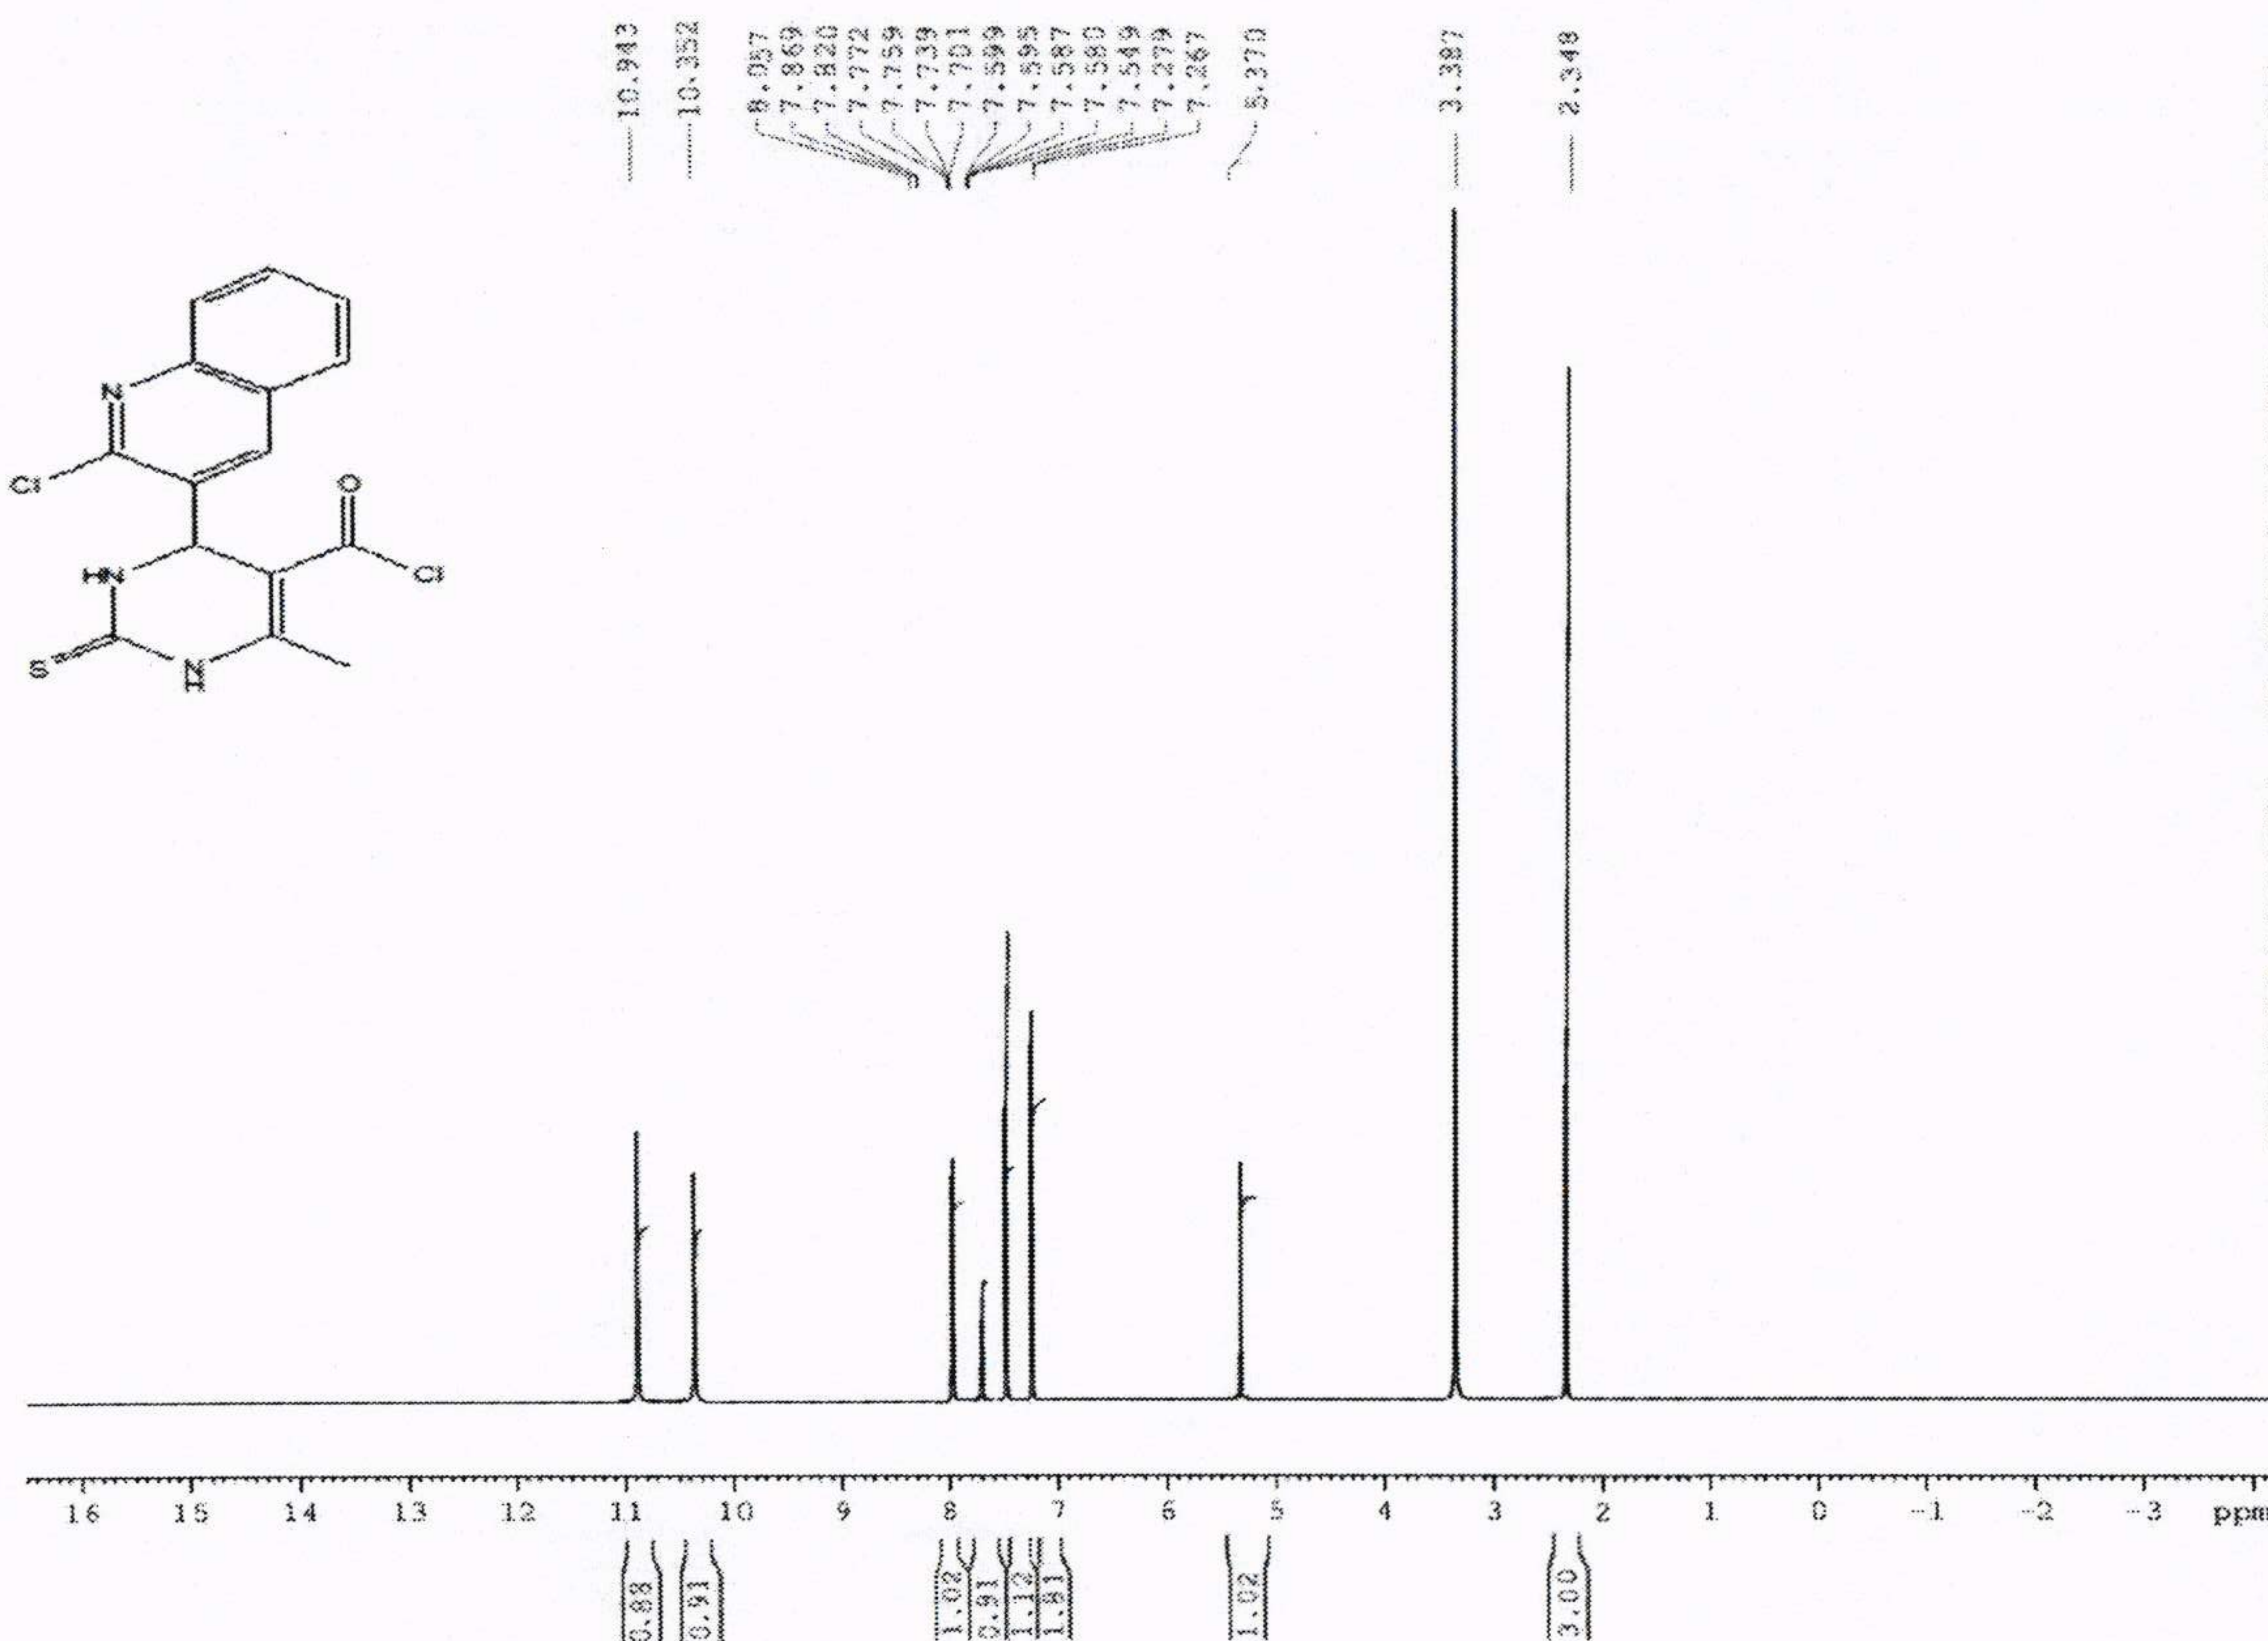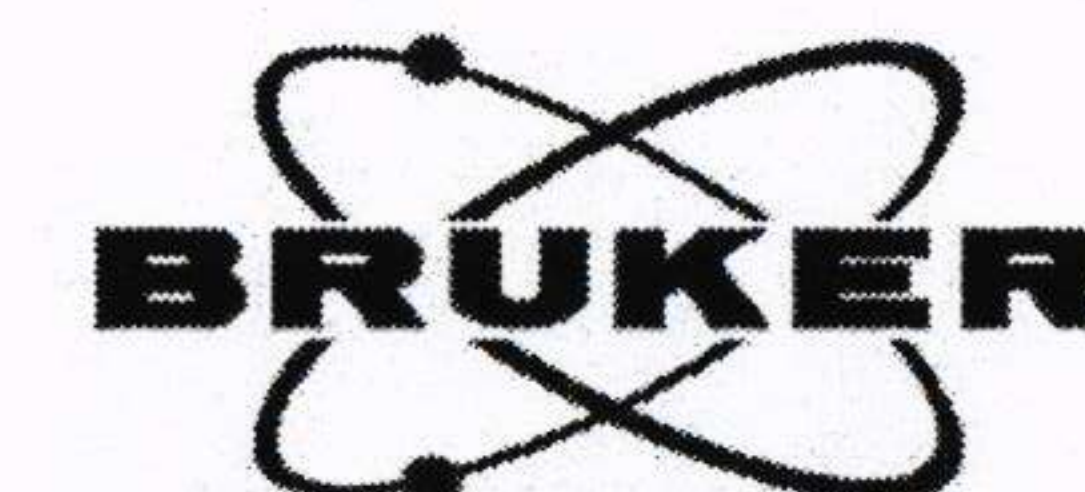

NAME drshahat-7  
EXPNO 10  
PROCNO 1  
Date\_ 20210624  
Time 18.59  
INSTRUM spect  
PROBHD 5 mm PABBO BB-  
PULPROG zg30  
TD 65536  
SOLVENT DMSO  
NS 16  
DS 2  
SWH 10330.578 Hz  
FIDRES 0.157632 Hz  
AQ 3.1720407 sec  
RG 90.5  
DW 48.400 usec  
DE 6.50 usec  
TE 298.3 K  
D1 1.00000000 sec  
TD0 1

\*\*\*\*\* CHANNEL f1 \*\*\*\*\*  
NUC1 1H  
P1 14.70 usec  
PL1 -1.10 dB  
SFO1 500.1330885 MHz  
SI 32768  
SF 500.1300000 MHz  
WDW EM  
SSB 0  
LB 0.30 Hz  
GB 0  
PC 1.00

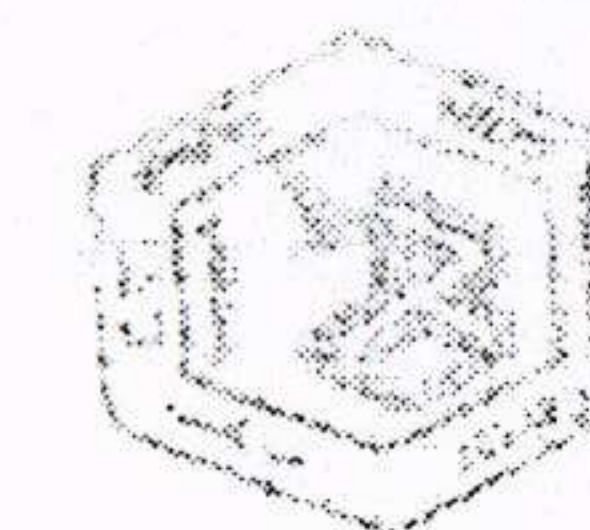



C13CPD32 DMSO D:\\ abari 45

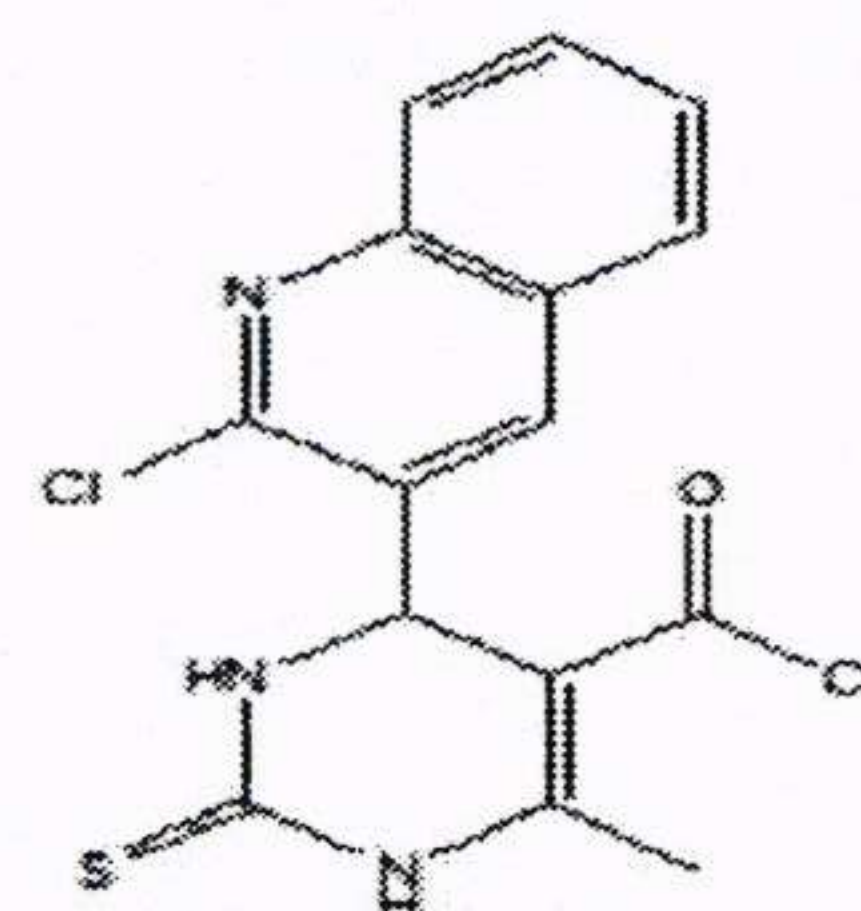

66

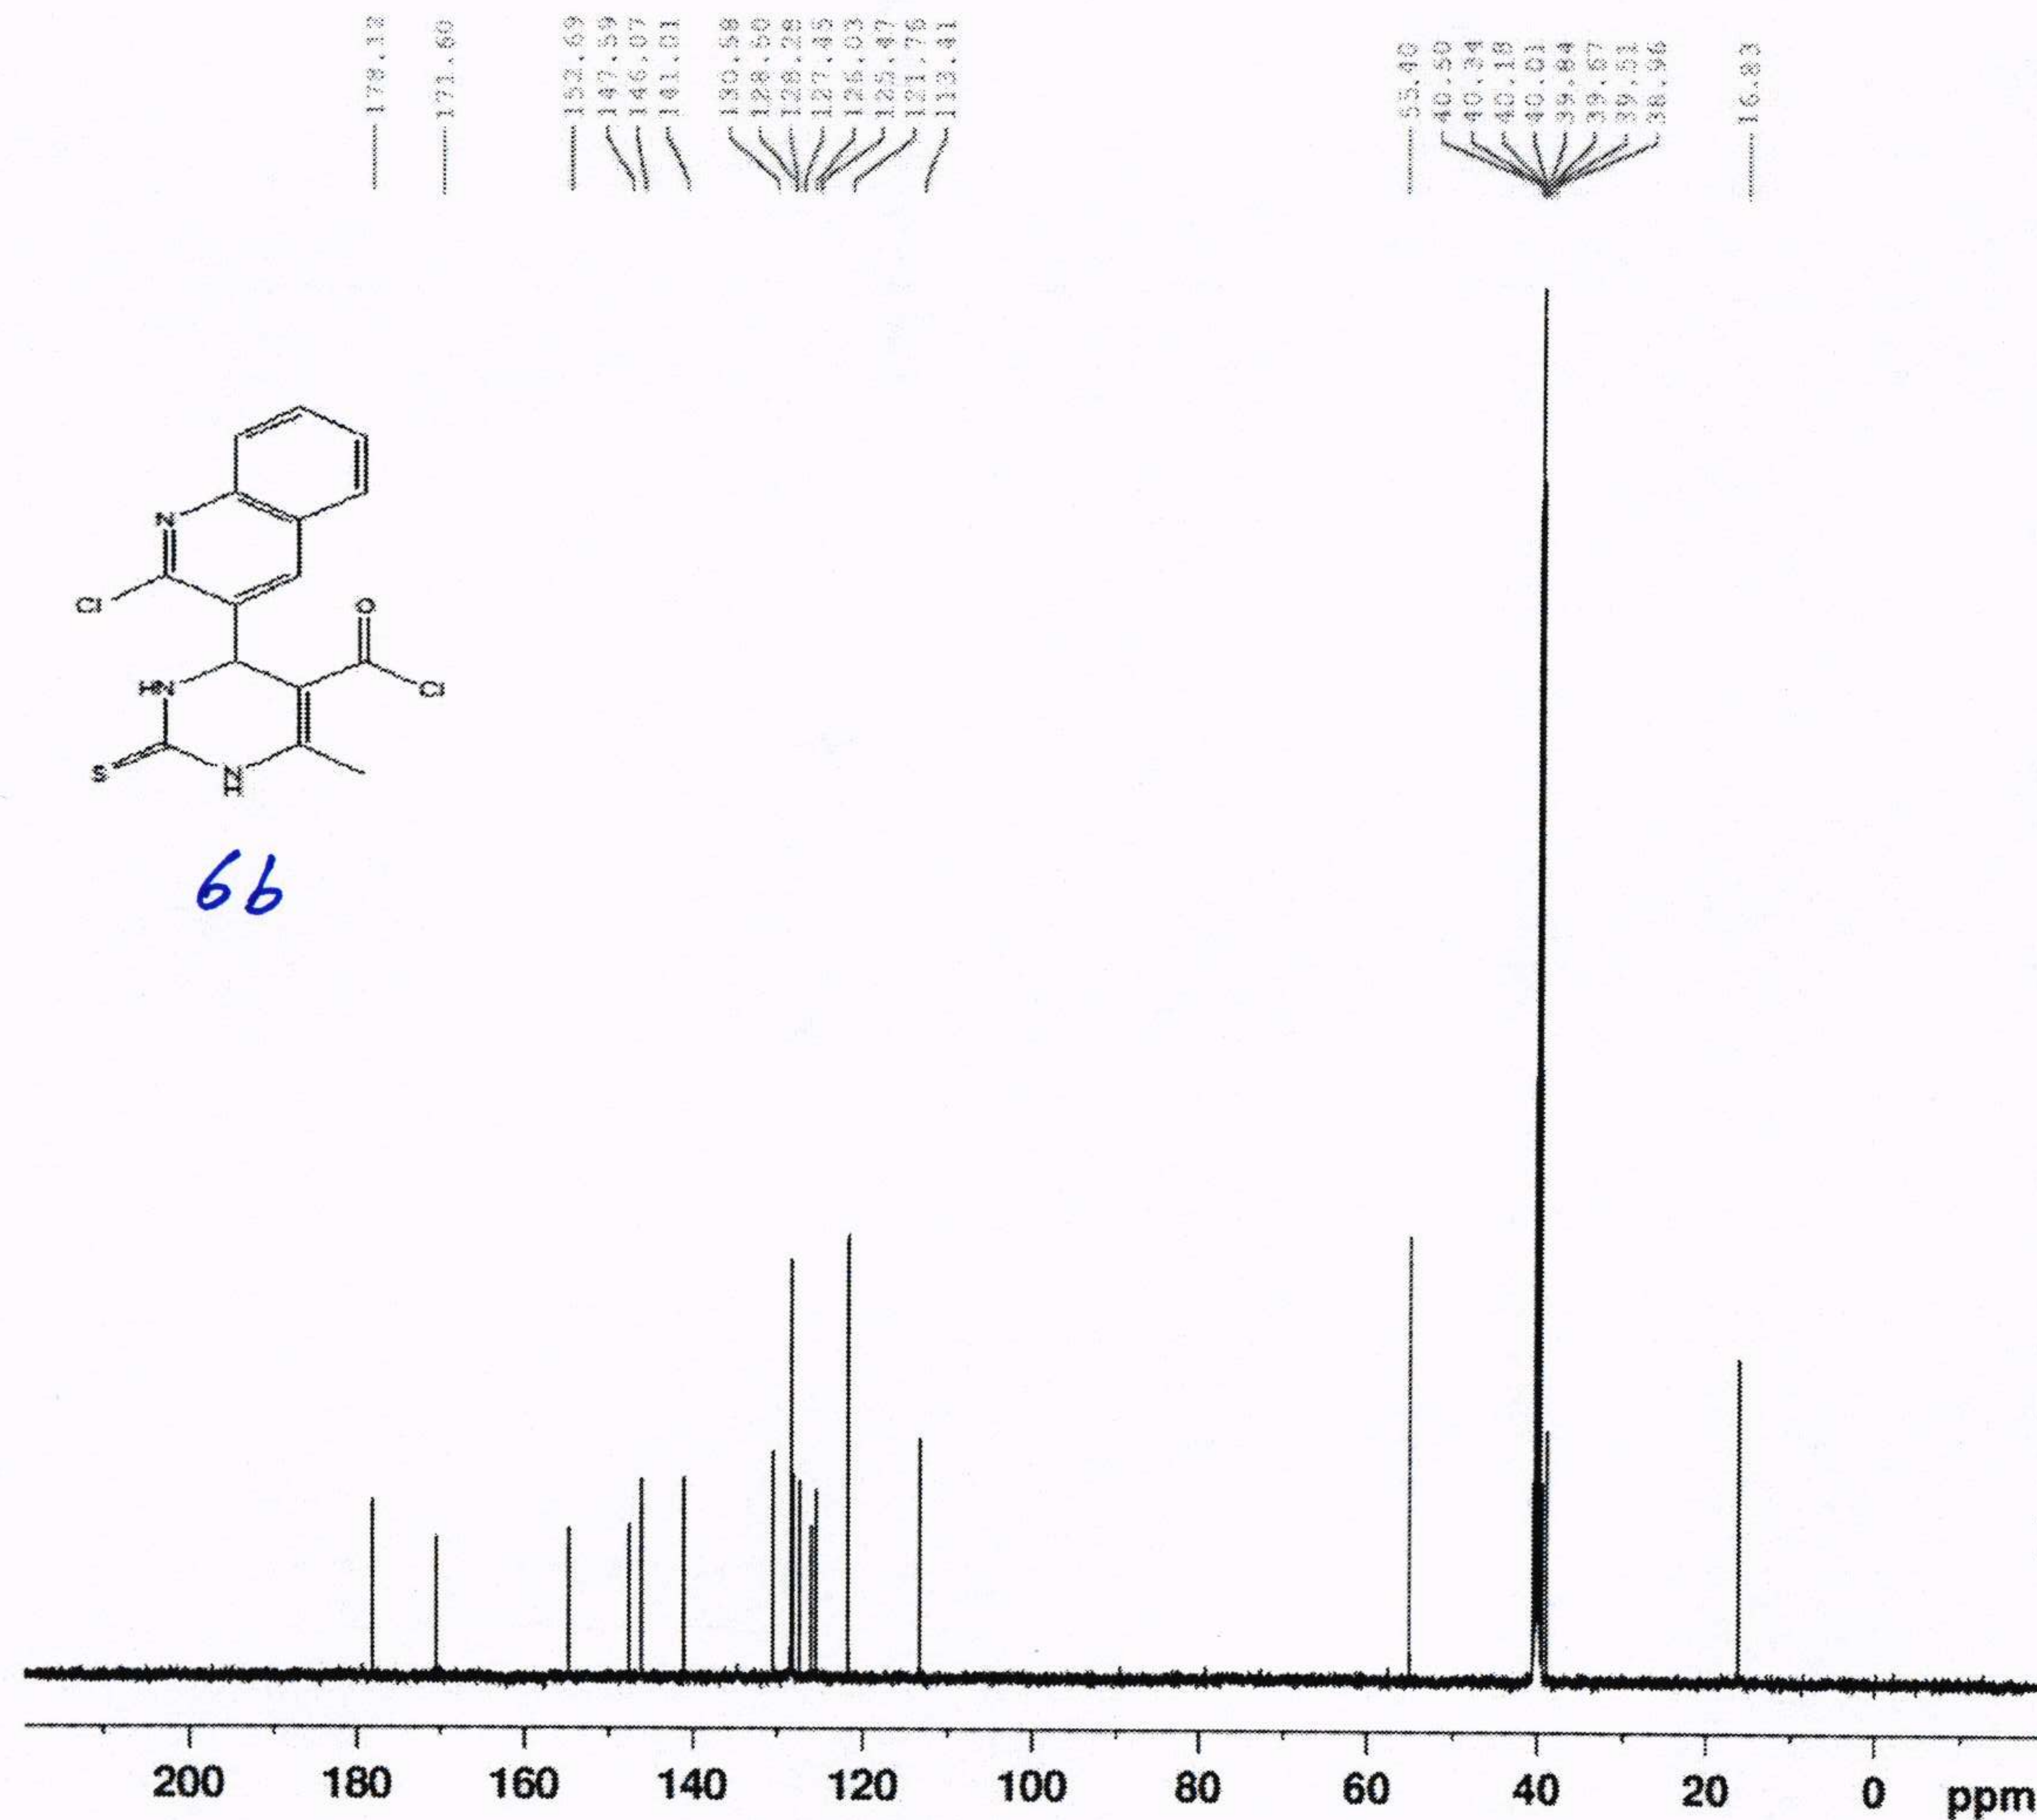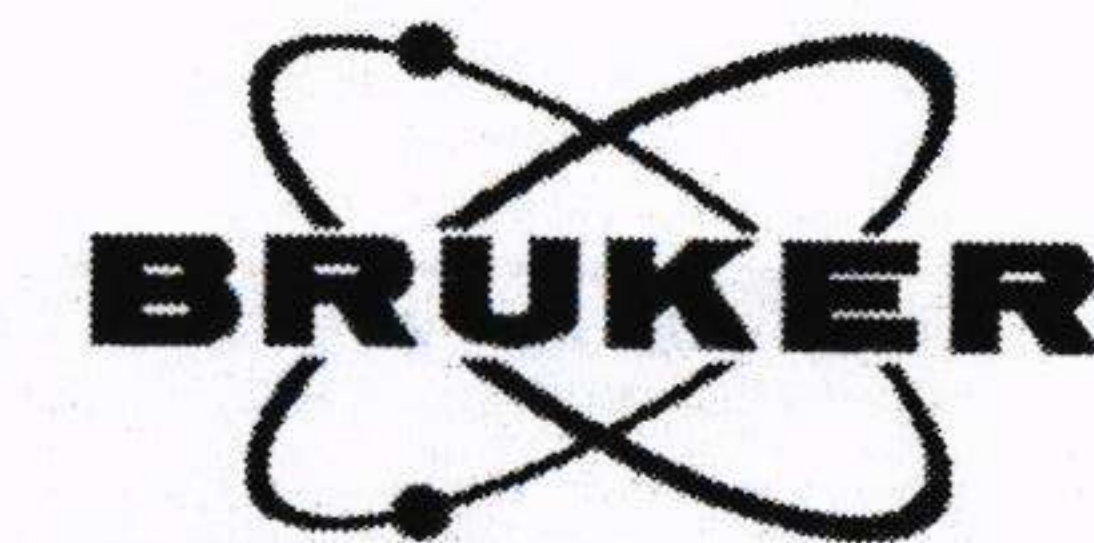

NAME drshahat-7  
EXPNO 11  
PROCNO 1  
Date\_ 20210624  
Time 13.45  
INSTRUM spect  
PROBHD 5 mm PABBO BB-  
PULPROG zgpg30  
TD 65536  
SOLVENT DMSO  
NS 1104  
DS 2  
SWH 30030.029 Hz  
FIDRES 0.458222 Hz  
AQ 1.0912410 sec  
RG 2048  
DW 16.650 usec  
DE 6.50 usec  
TE 299.0 K  
D1 2.00000000 sec  
D11 0.03000000 sec  
TD0 1

===== CHANNEL f1 =====  
NUC1 13C  
P1 20.00 usec  
PL1 -6.00 dB  
SFO1 125.7703643 MHz

===== CHANNEL f2 =====  
CPDPRG2 waltz16  
NUC2 1H  
PCPD2 80.00 usec  
PL2 -1.10 dB  
PL12 13.44 dB  
PL13 16.40 dB  
SFO2 500.1320005 MHz  
SI 32768  
SF 125.7577890 MHz  
WDW EM  
SSB 0  
LB 1.00 Hz  
GB 0  
PC 1.40

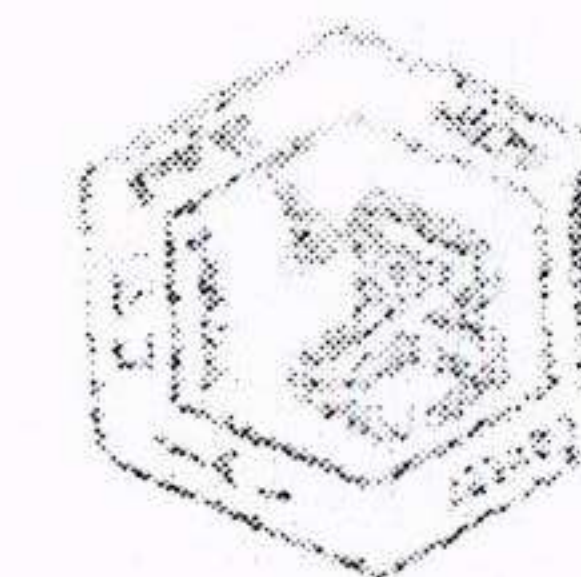



4-(1,3-Diphenyl-1H-pyrazol-4-yl)-6-methyl-2-thioxo-1,2,3,4-tetrahydropyrimidine-5-carbonyl chloride

6c

DN DMSO D:\ abar

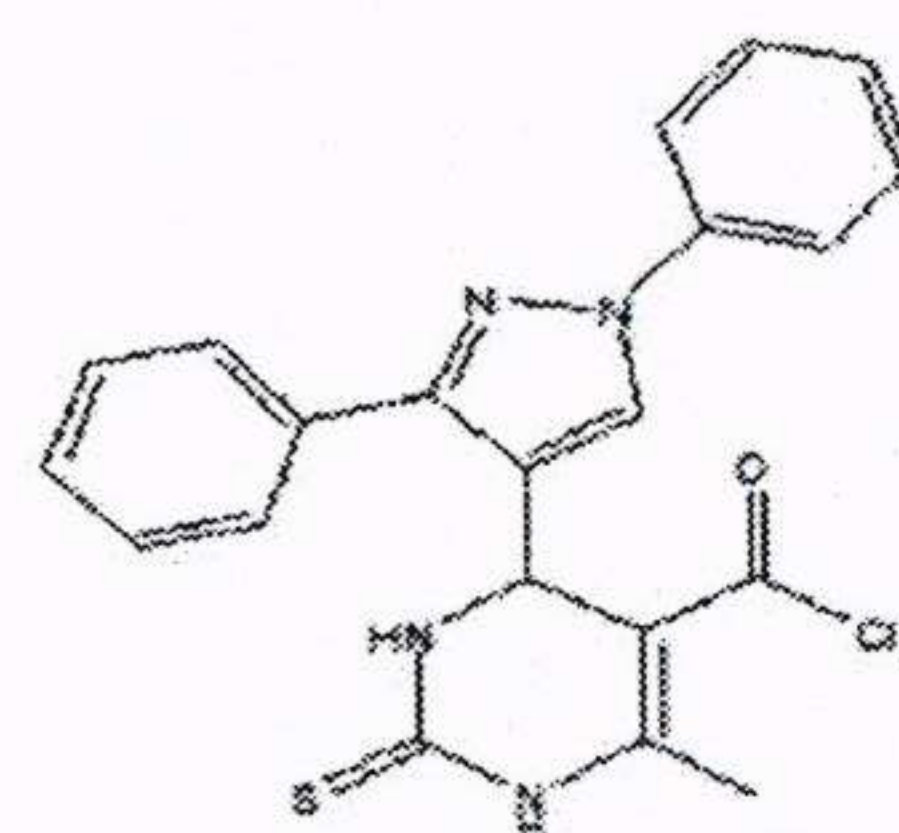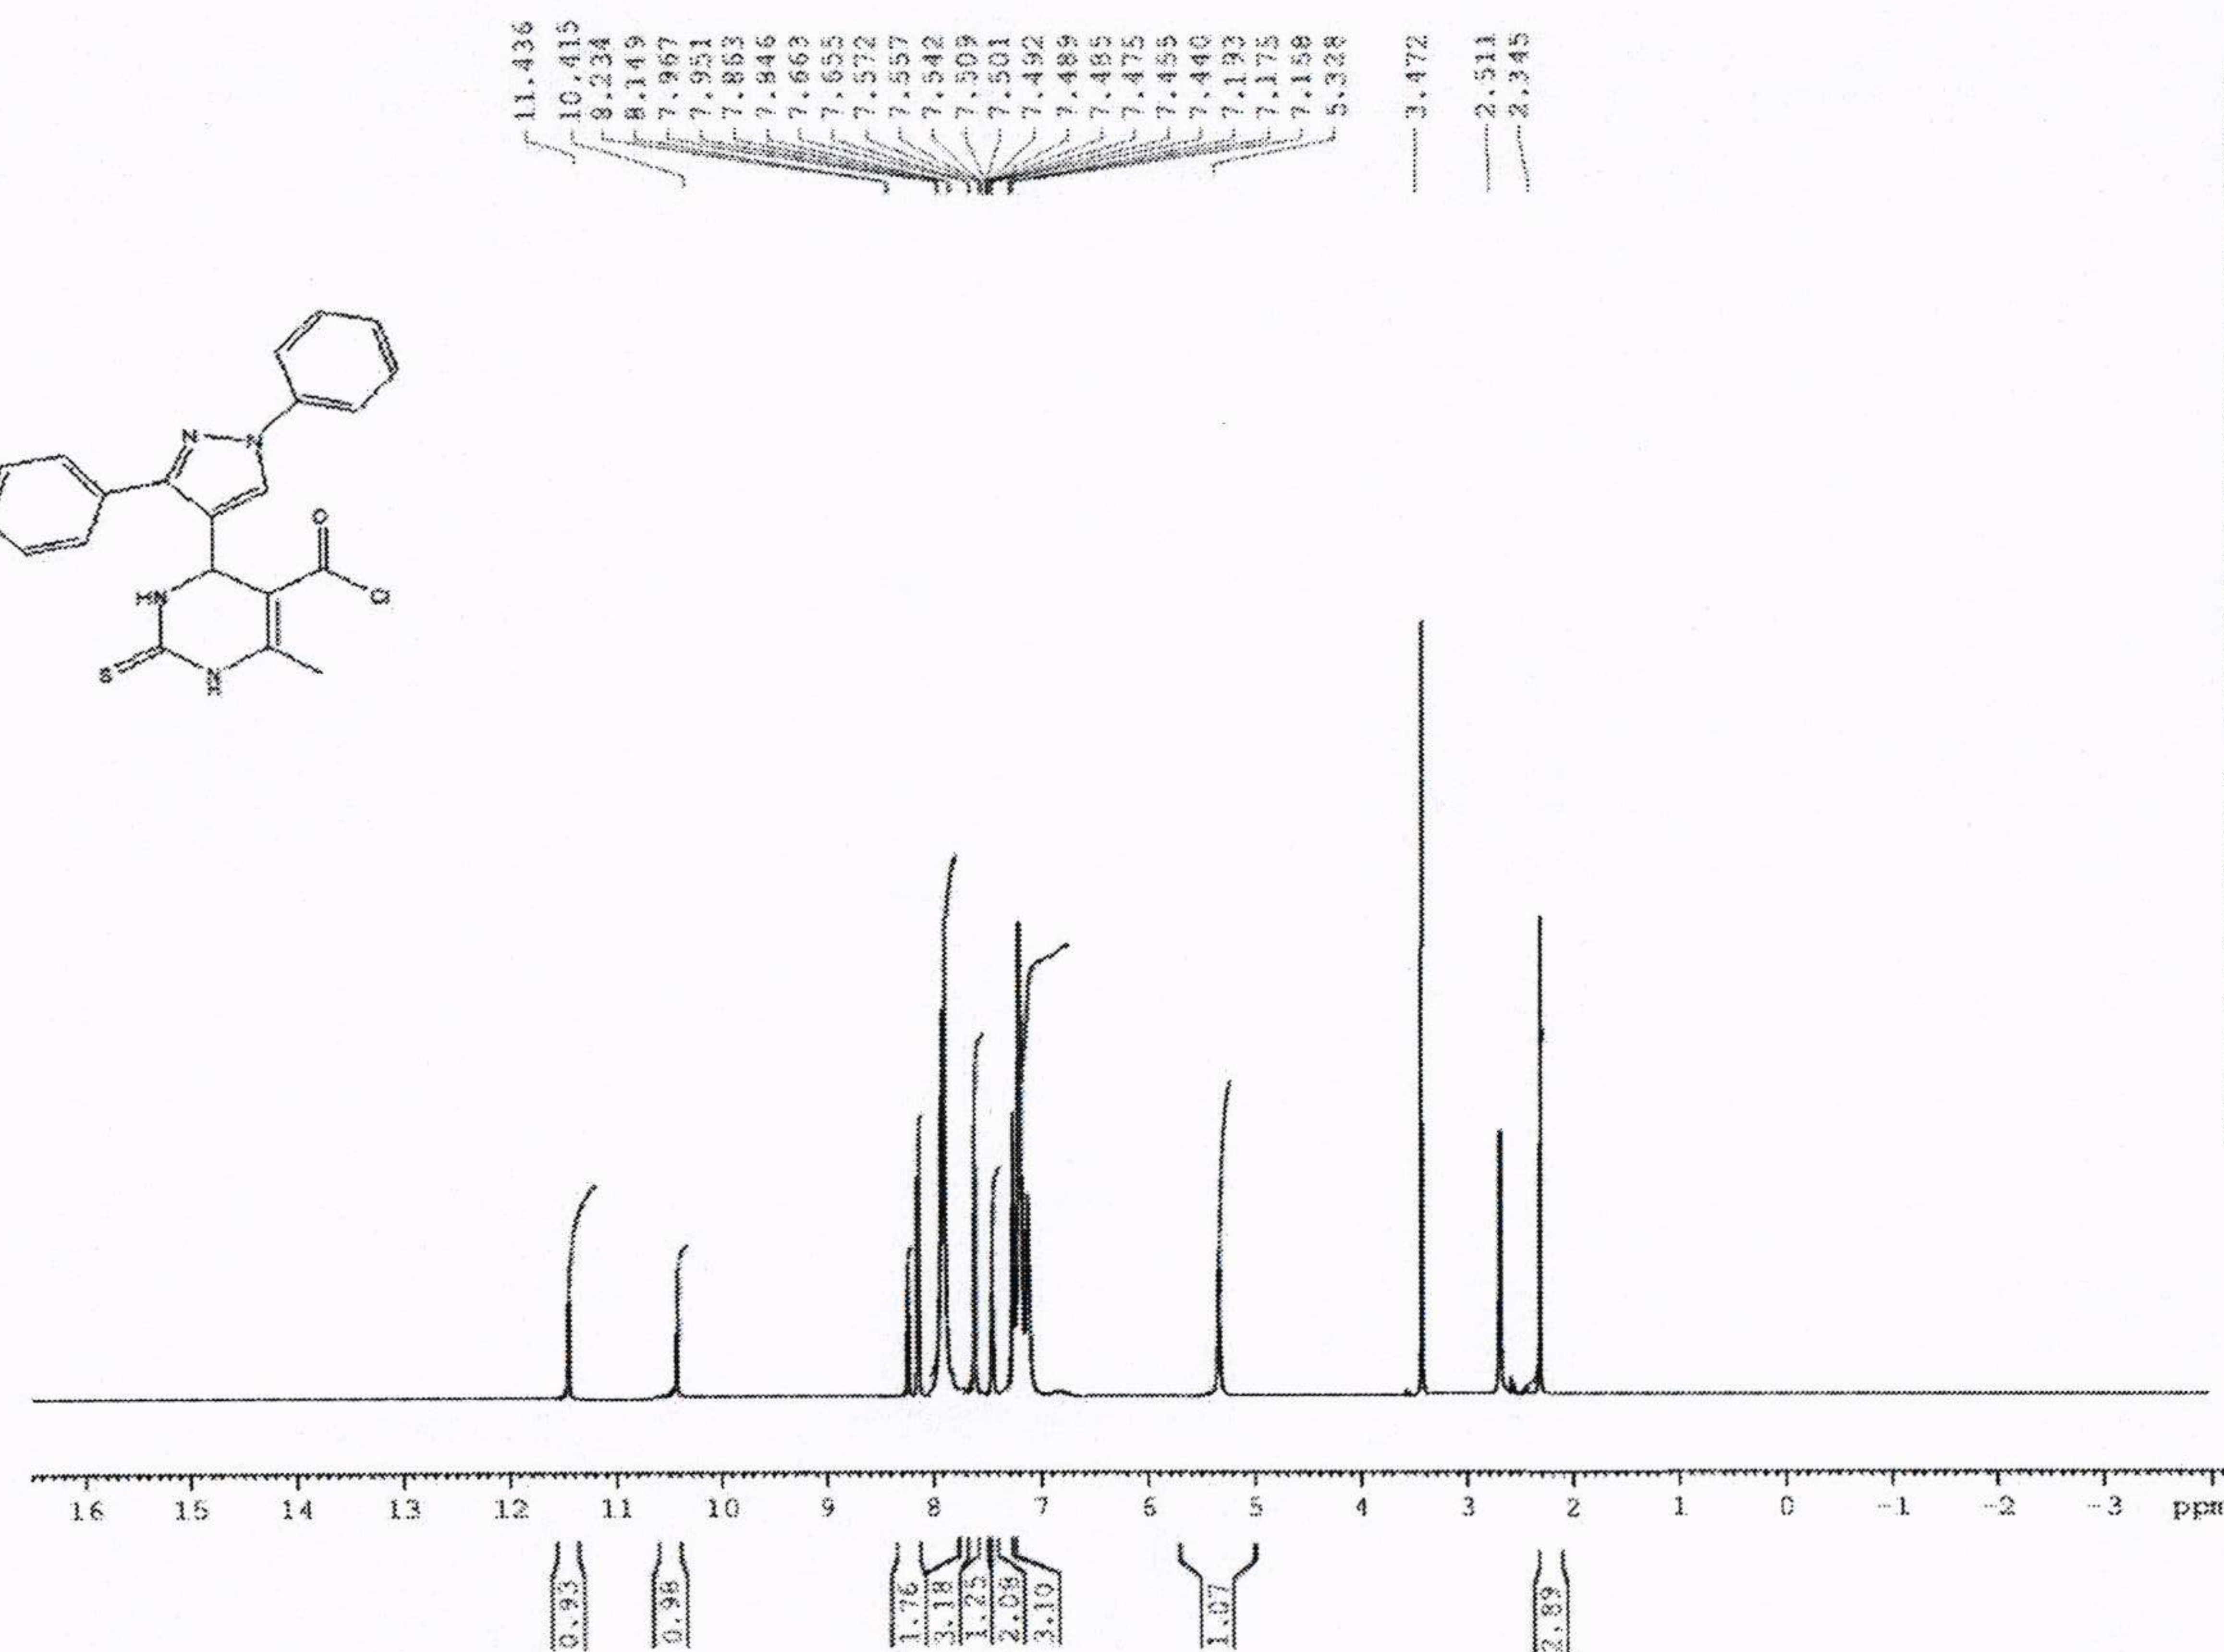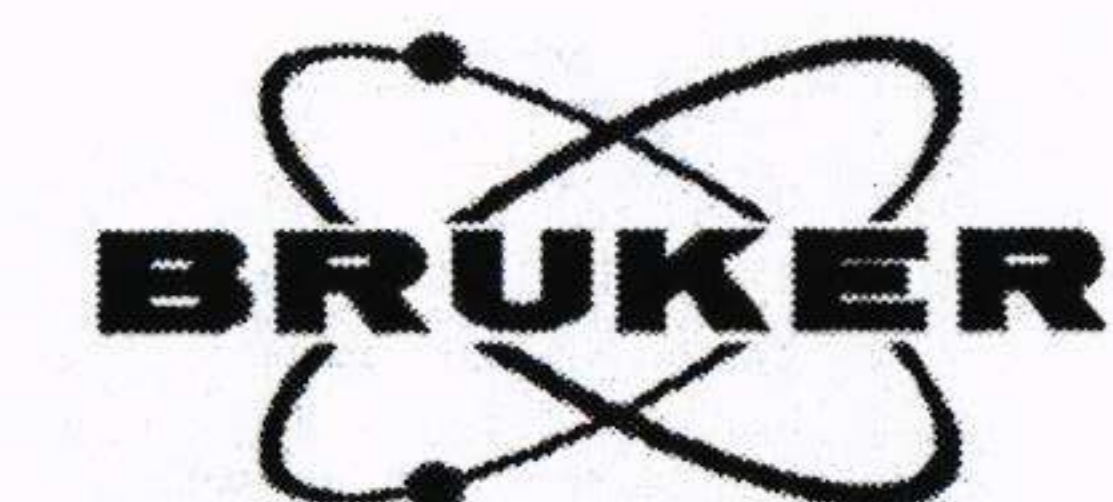

NAME drshahat-9  
EXPNO 10  
PROCNO 1  
Date\_ 20210622  
Time 11.17  
INSTRUM spect  
PROBHD 5 mm F4BBO BB-  
PULPROG zg30  
TD 65536  
SOLVENT DMSO  
NS 16  
DS 2  
SWH 10330.578 Hz  
FIDRES 0.157632 Hz  
AQ 3.1720407 sec  
RG 128  
DW 48.400 usec  
DE 6.50 usec  
TE 298.3 K  
D1 1.00000000 sec  
TD0 1

===== CHANNEL f1 =====  
NUC1 1H  
P1 14.70 usec  
PL1 -1.10 dB  
SFO1 500.1330885 MHz  
SI 32768  
SF 500.1300000 MHz  
WDW EM  
SSB 0  
LB 0.30 Hz  
GB 0  
PC 1.00

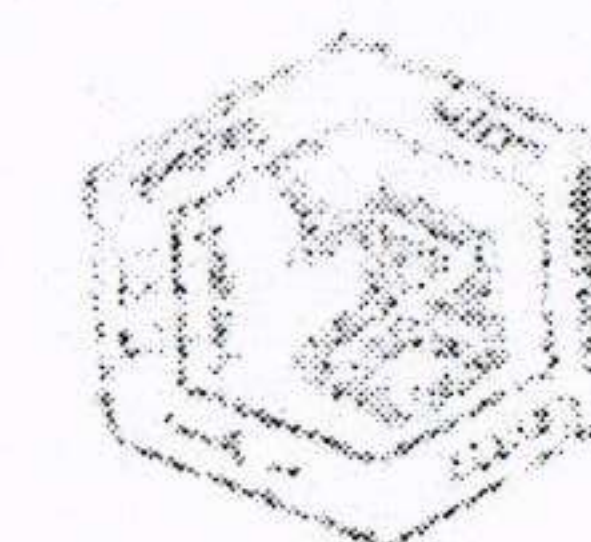



C13CPD32 DMSO D:\\ abari 44

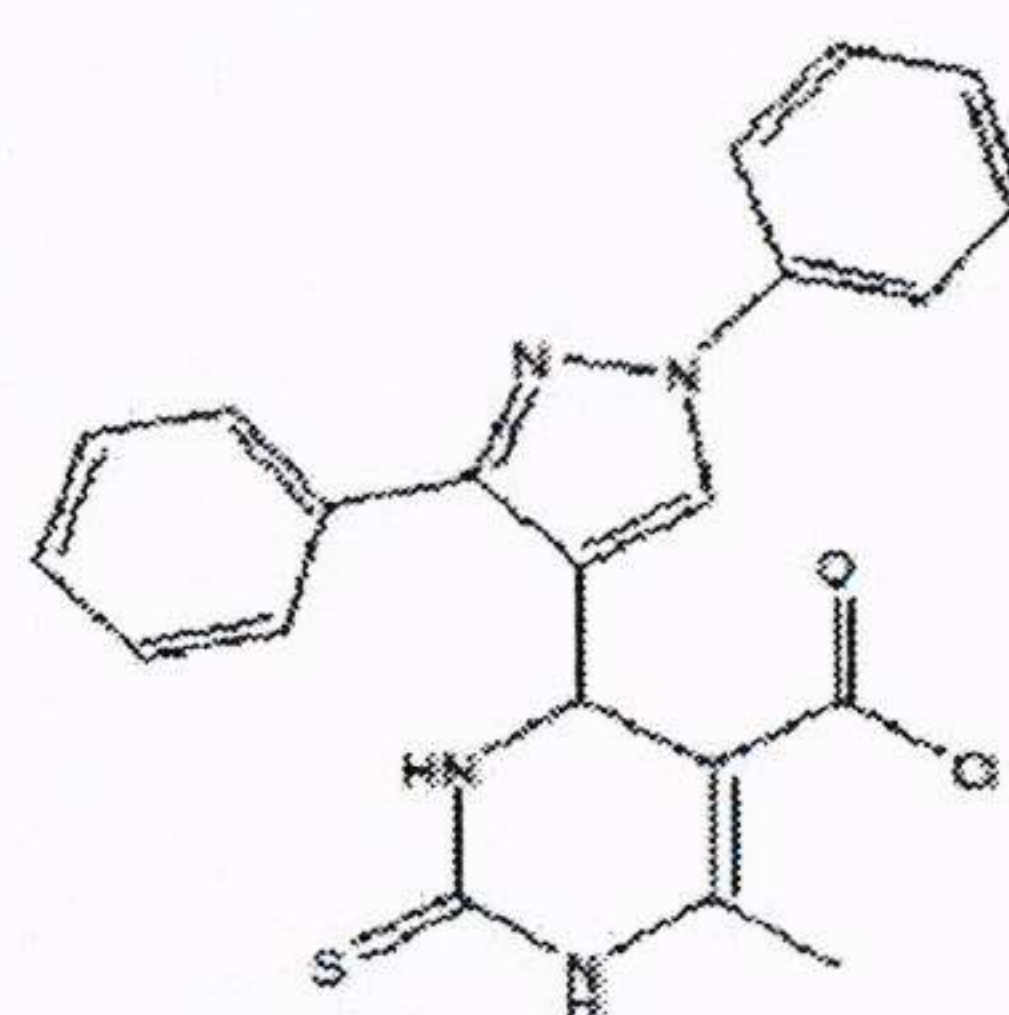

6c

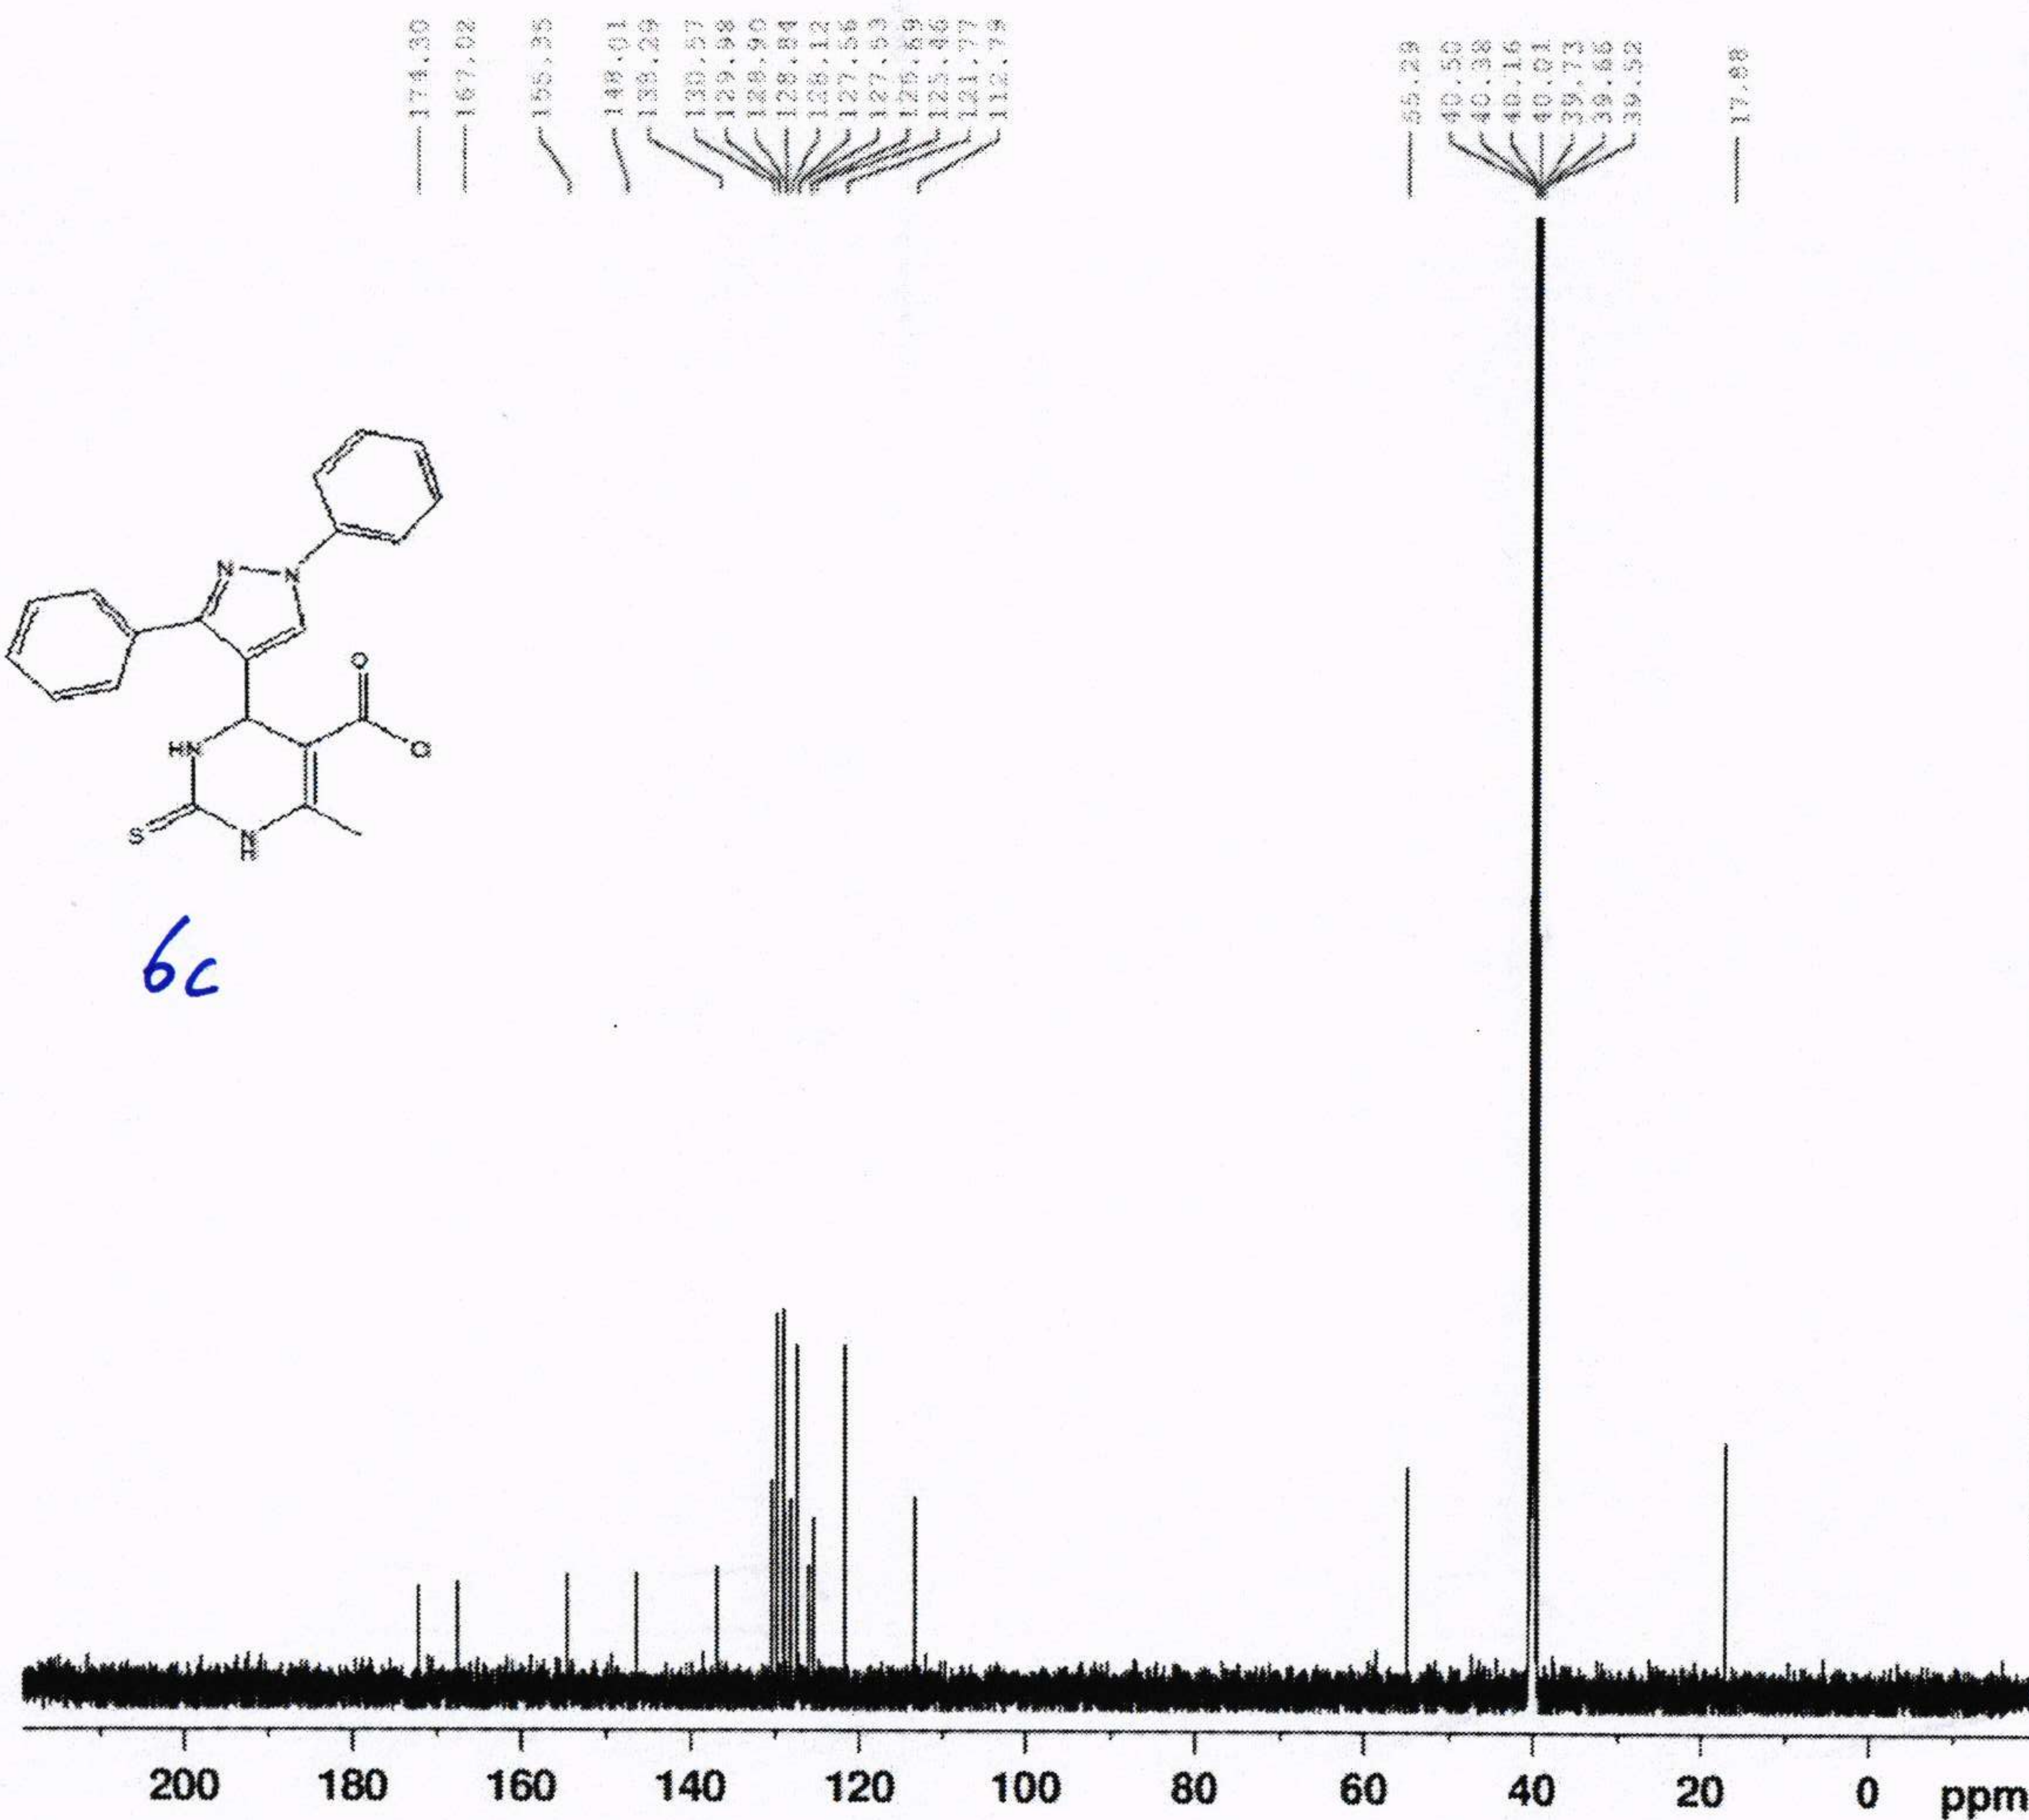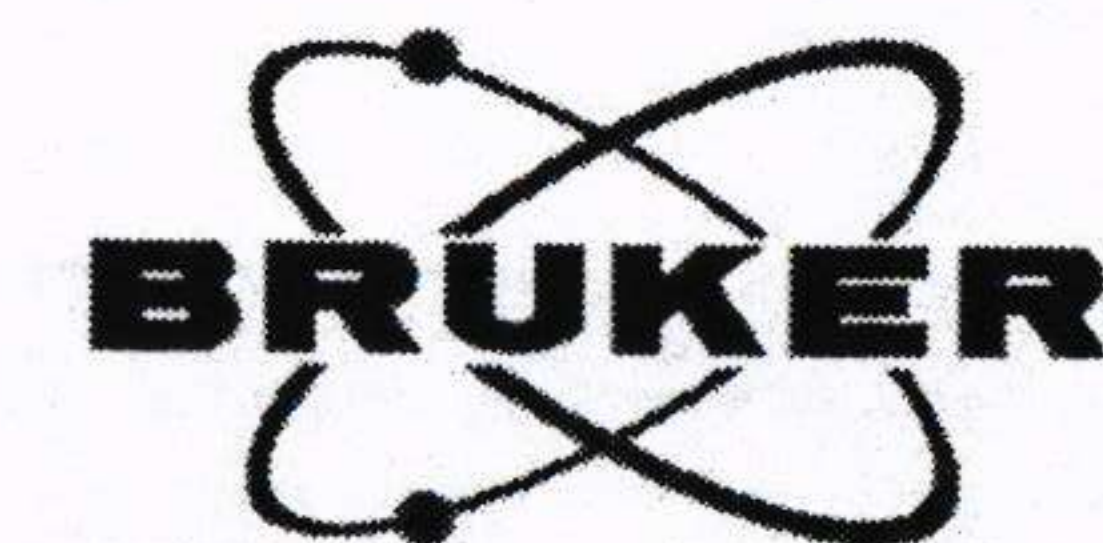

NAME drshahat-9  
 EXPNO 11  
 PROCNO 1  
 Date\_ 20210622  
 Time 12.07  
 INSTRUM spect  
 PROBHD 5 mm PABBO BB-  
 PULPROG zgpg30  
 TD 65536  
 SOLVENT DMSO  
 NS 1165  
 DS 2  
 SWH 30030.029 Hz  
 FIDRES 0.458222 Hz  
 AQ 1.0912410 sec  
 RG 4597.6  
 DW 16.650 usec  
 DE 6.50 usec  
 TE 299.2 K  
 D1 2.00000000 sec  
 D11 0.03000000 sec  
 TD0 1

===== CHANNEL f1 =====  
 NUC1 13C  
 P1 20.00 usec  
 PL1 -6.00 dB  
 SFO1 125.7703643 MHz

===== CHANNEL f2 =====  
 CPDPRG2 waltz16  
 NUC2 1H  
 PCPD2 80.00 usec  
 PL2 -1.10 dB  
 PL12 13.44 dB  
 PL13 16.40 dB  
 SFO2 500.1320005 MHz  
 SI 32768  
 SF 125.7577890 MHz  
 WDW EM  
 SSB 0  
 LB 1.00 Hz  
 GB 0  
 PC 1.40

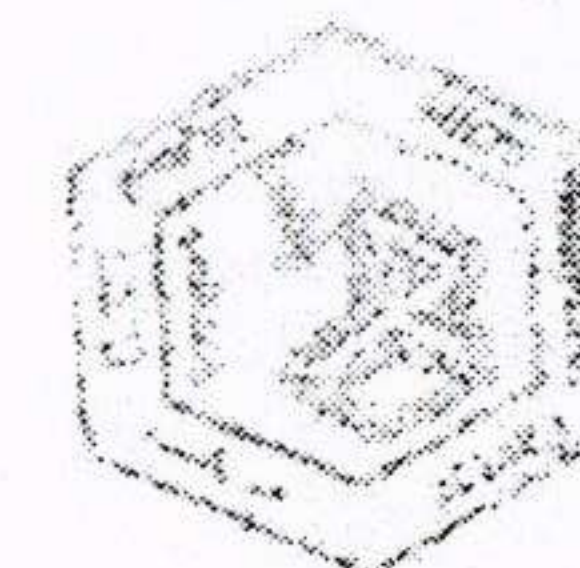



4-(1H-Indol-3-yl)-6-methyl-N-phenyl-2-thioxo-1,2,3,4-tetrahydropyrimidine-5-carboxamide

7a

ON DMSO D:\ abar

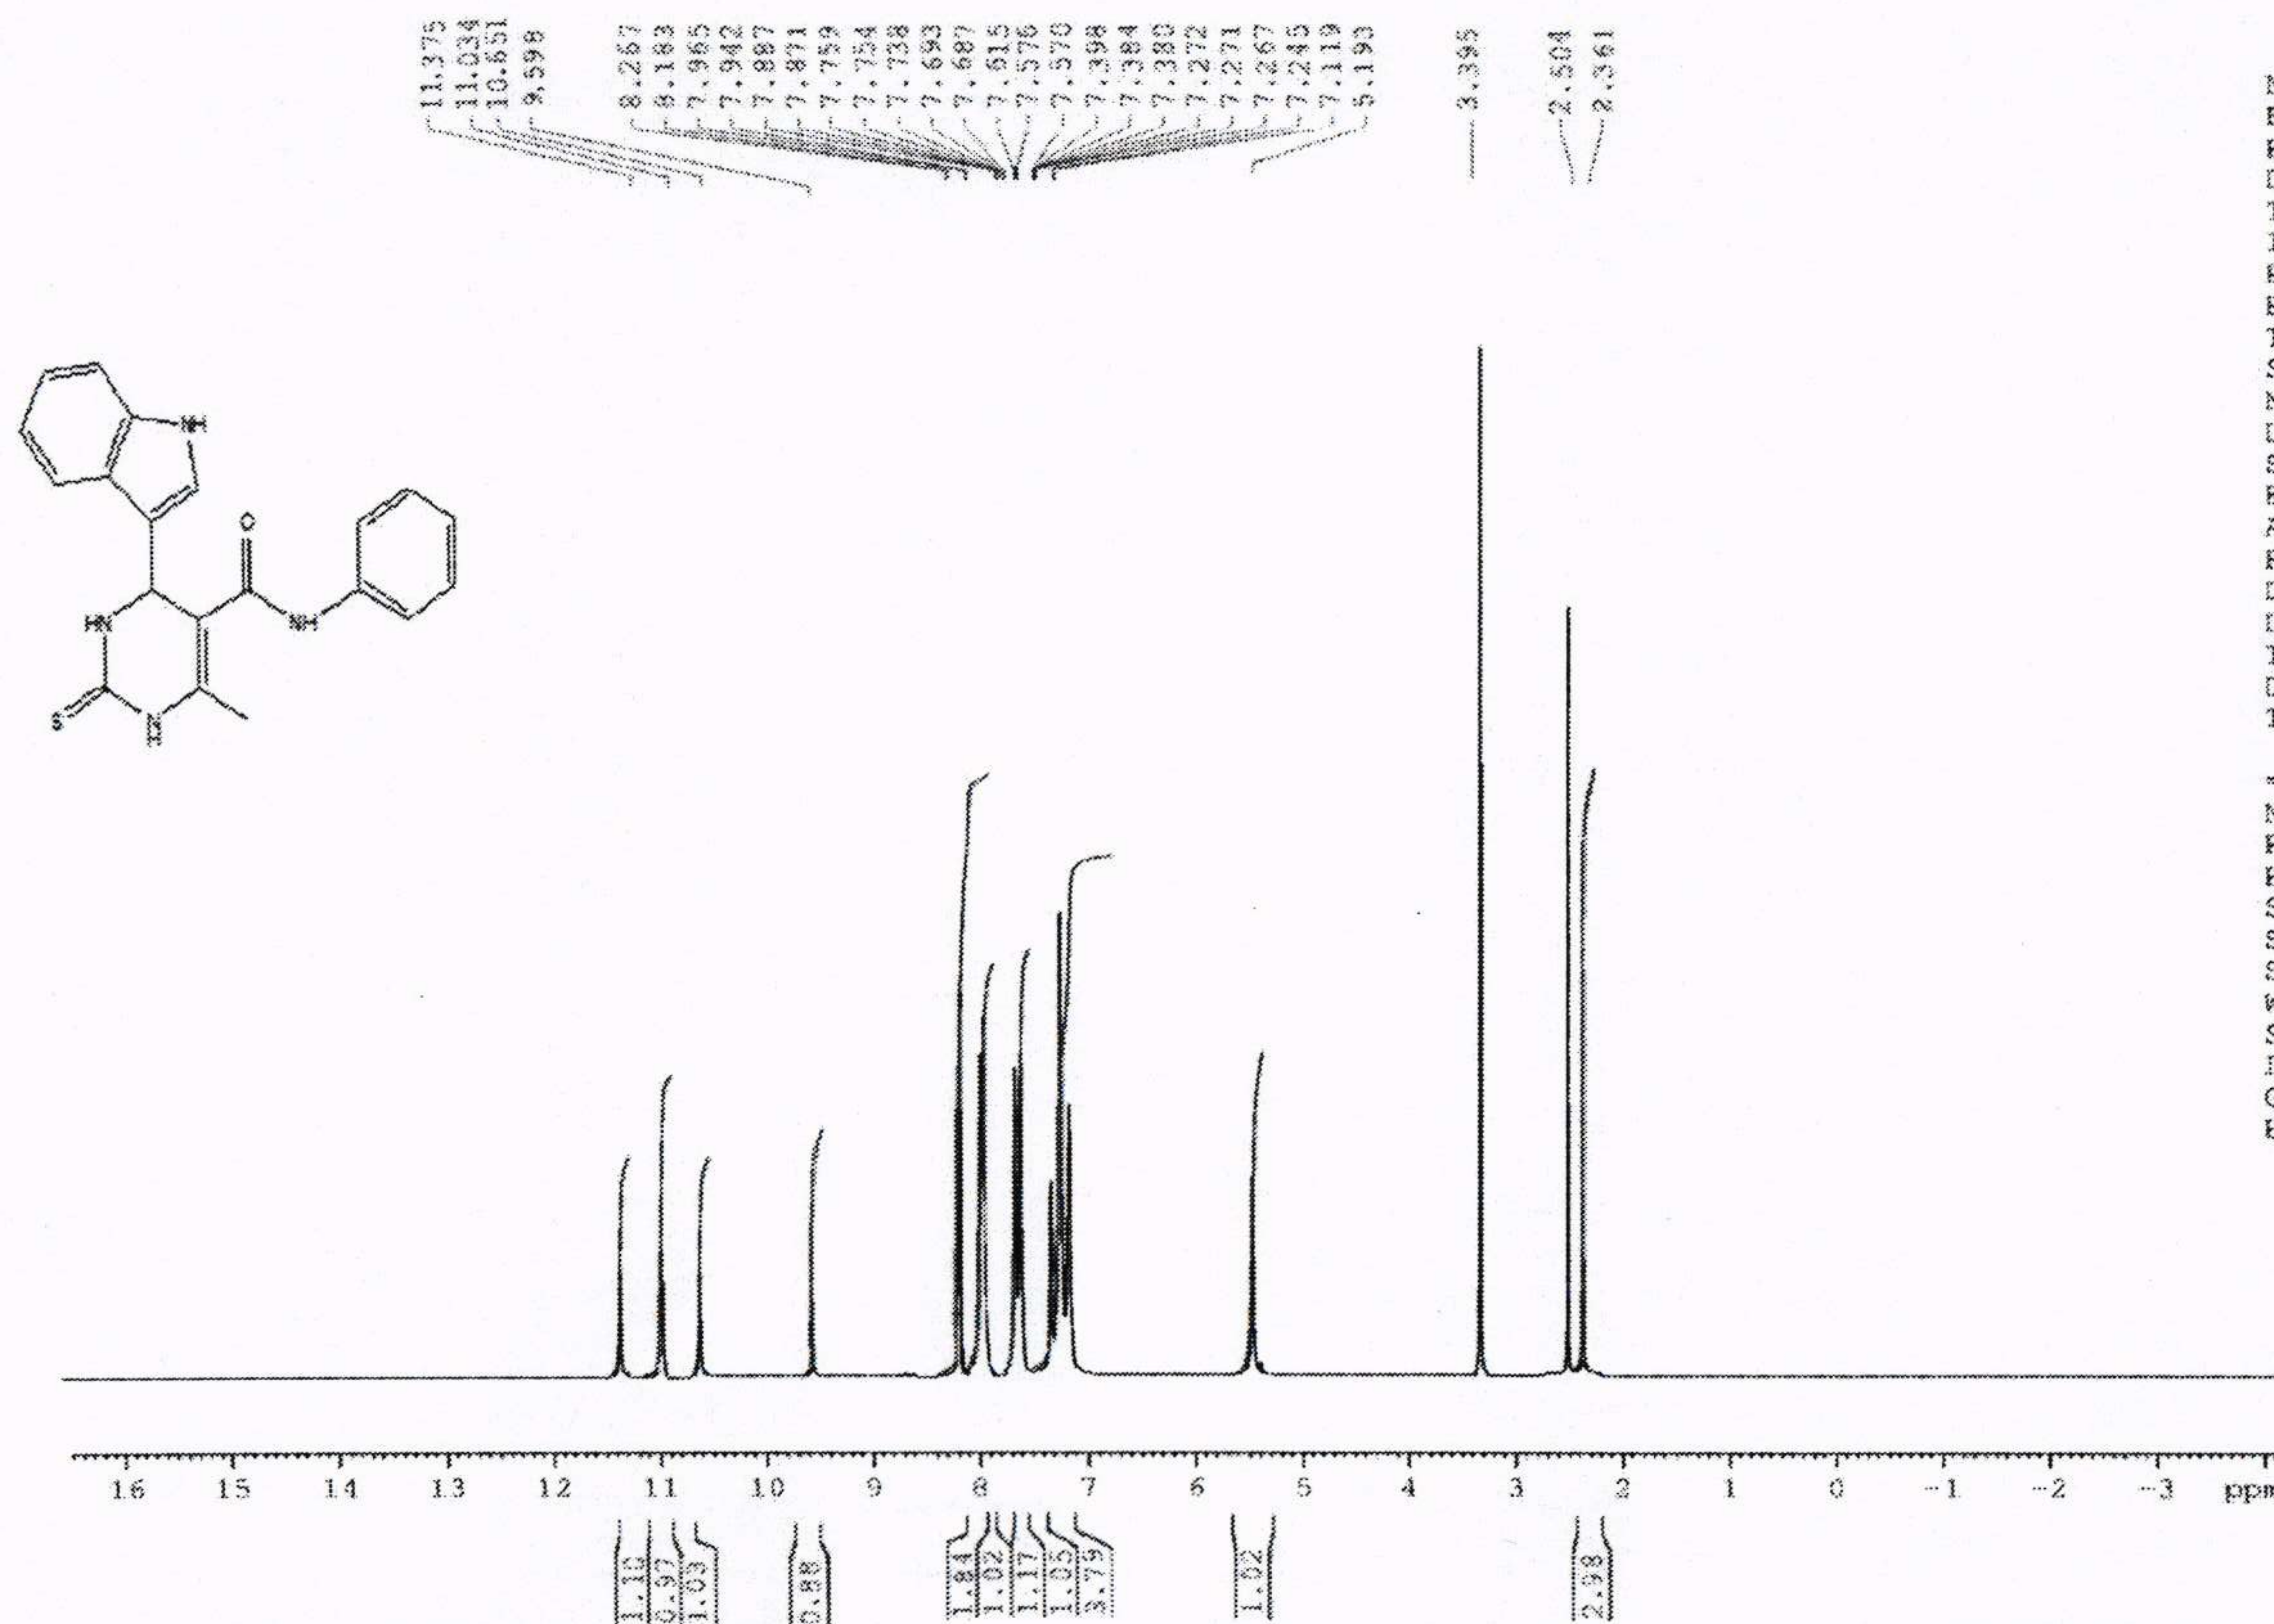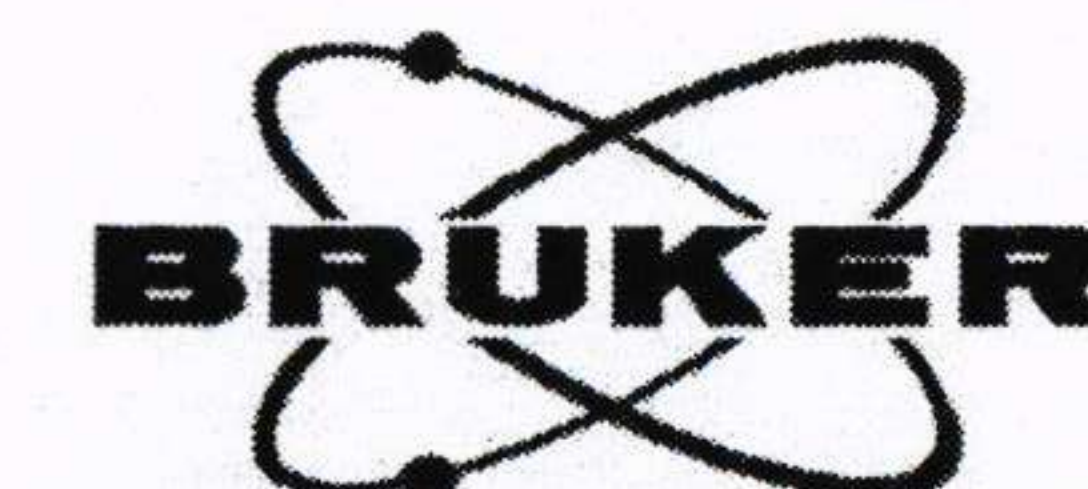

NAME drshahat-11  
 EXPNO 10  
 PROCNO 1  
 Date\_ 20210624  
 Time 18.59  
 INSTRUM spect  
 PROBHD 5 mm PABBO BB-  
 PULPROG zg30  
 TD 65536  
 SOLVENT DMSO  
 NS 16  
 DS 2  
 SWH 10330.578 Hz  
 FIDRES 0.157632 Hz  
 AQ 3.1720407 sec  
 RG 90.5  
 DW 48.400 usec  
 DE 6.50 usec  
 TE 298.3 K  
 D1 1.00000000 sec  
 TDO 1

===== CHANNEL f1 =====  
 NUC1 1H  
 P1 14.70 usec  
 PL1 -1.10 dB  
 SFO1 500.1330885 MHz  
 SI 32768  
 SF 500.1300000 MHz  
 WDW EM  
 SSB 0  
 LB 0.30 Hz  
 GB 0  
 PC 1.00

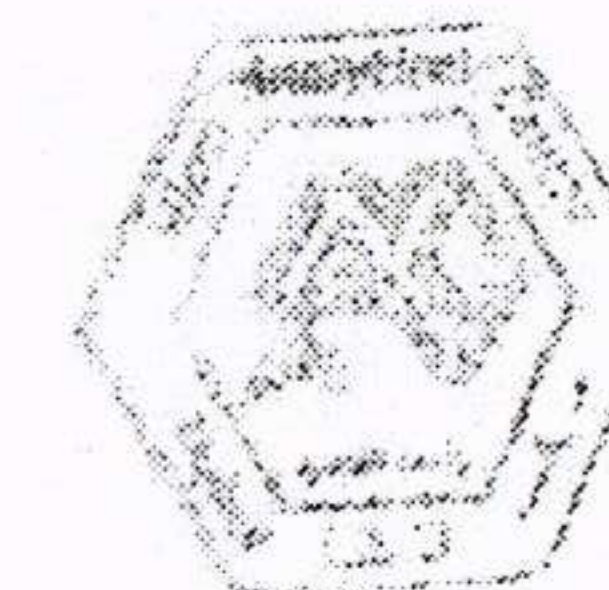



C13CPD32 DMSO D:\\ abari 46

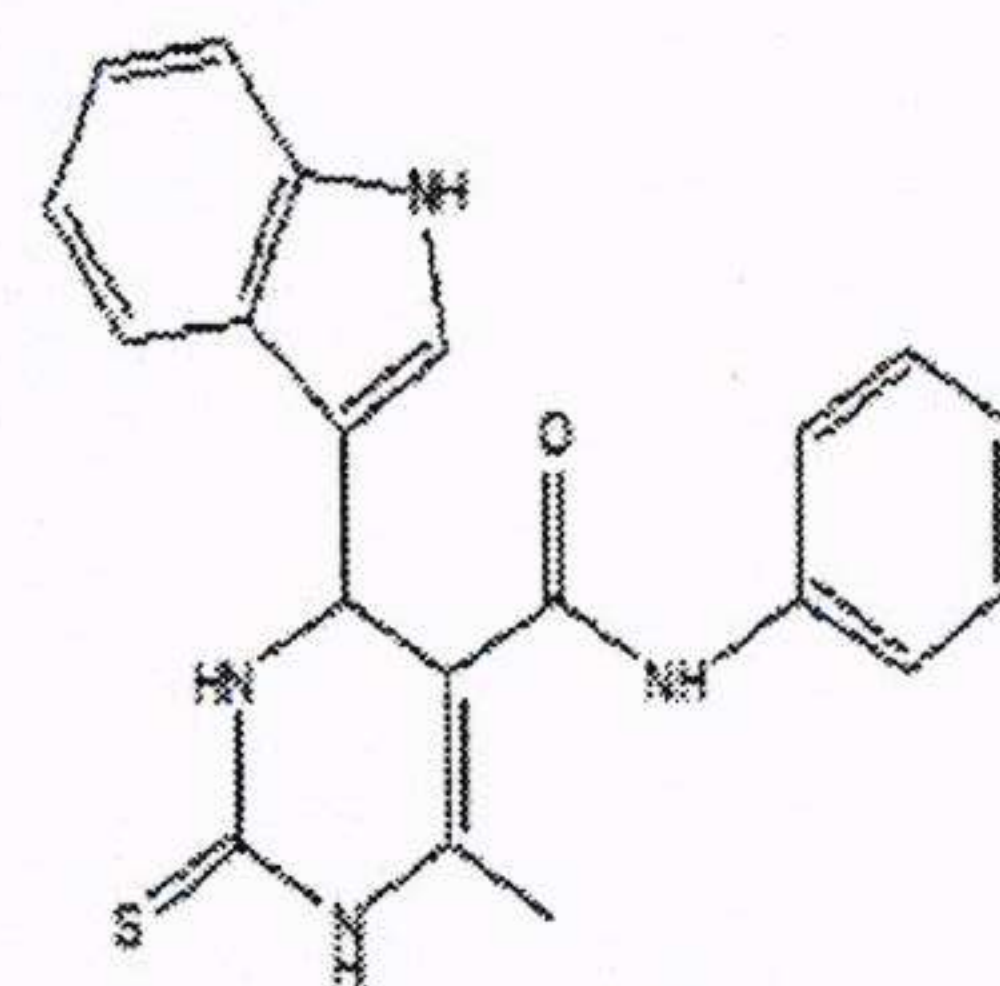

7a

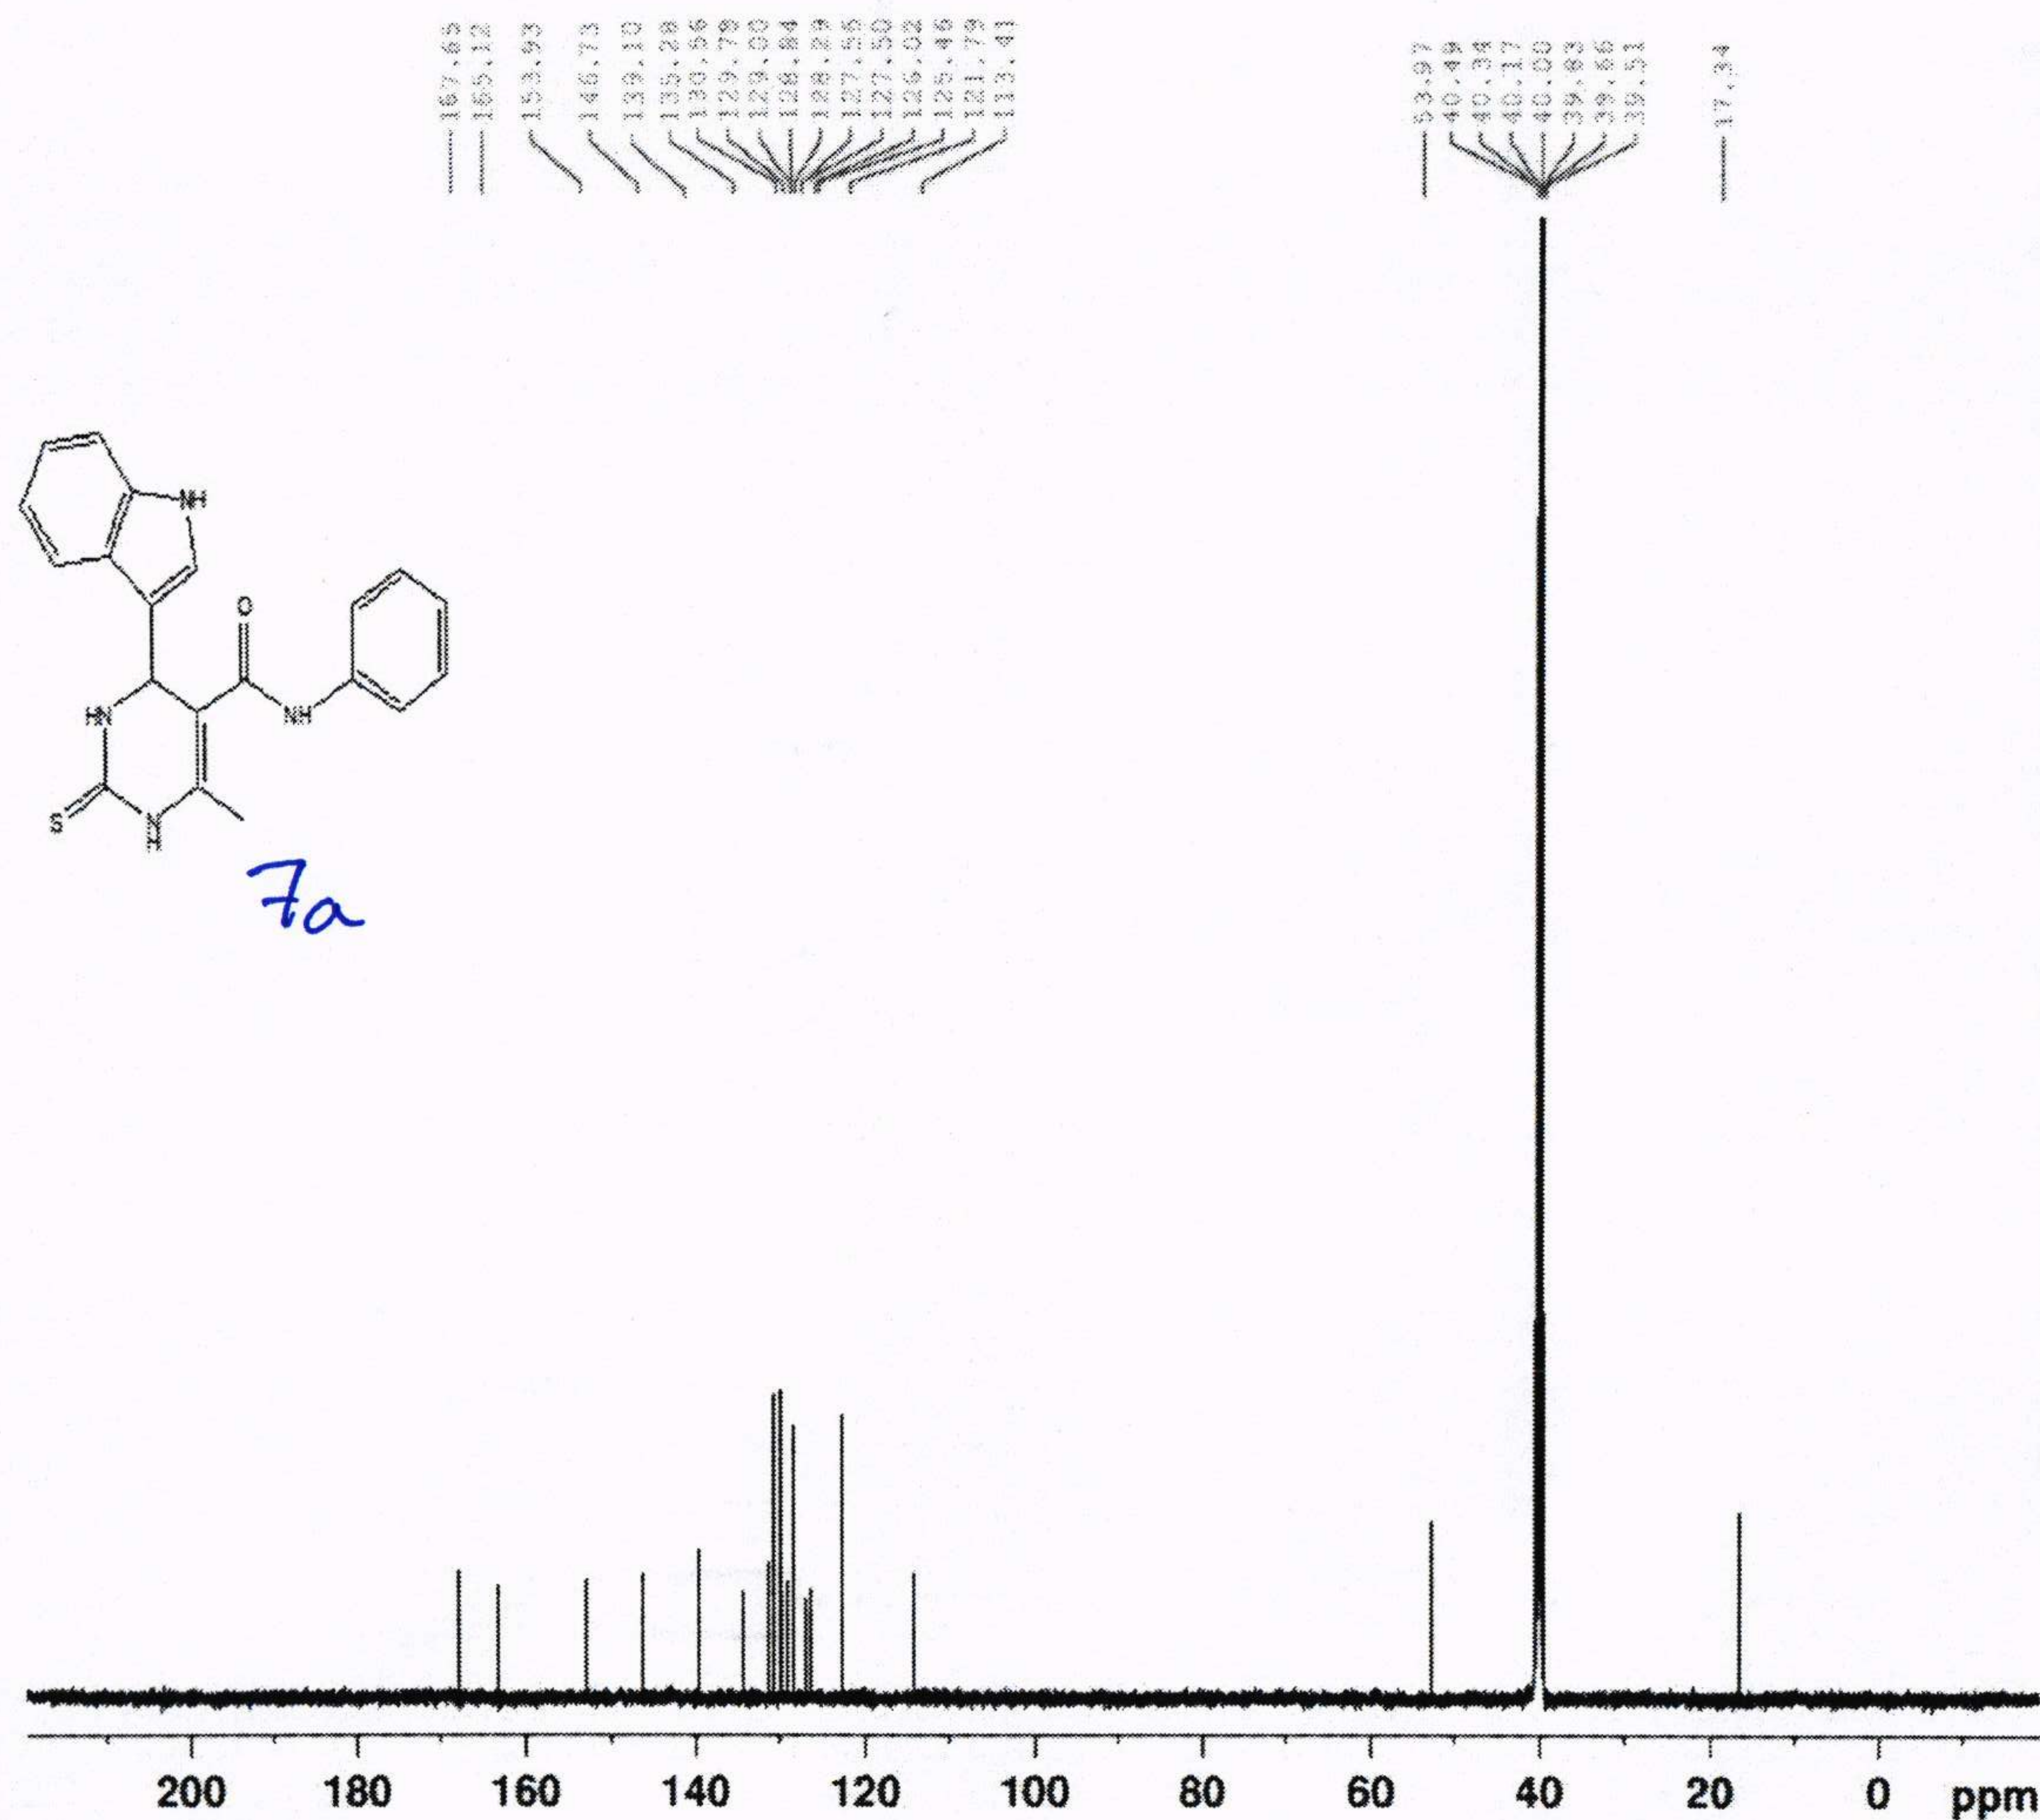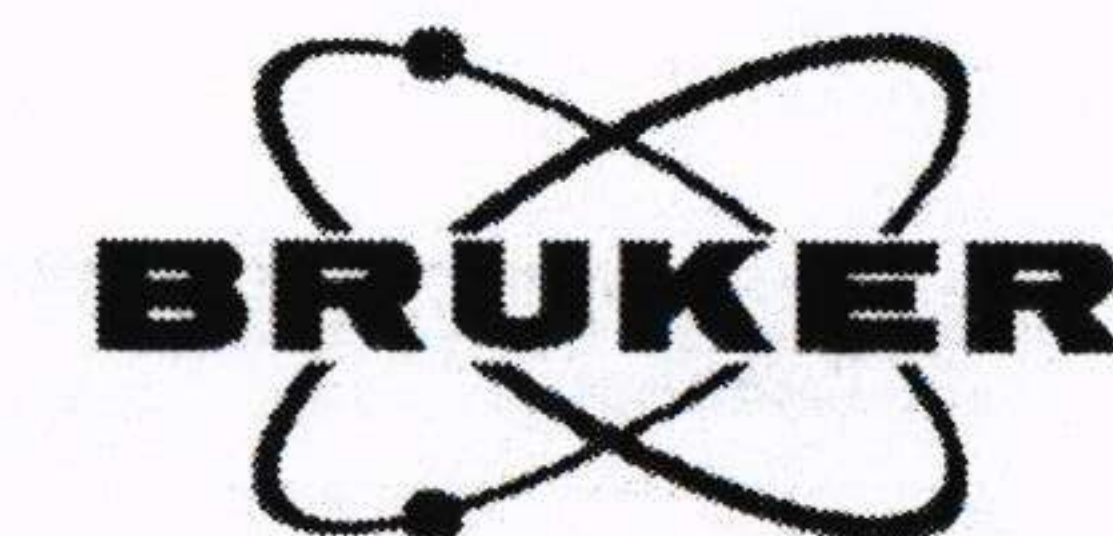

NAME drshahat-11  
EXPNO 11  
PROCNO 1  
Date\_ 20210624  
Time 20.47  
INSTRUM spect  
PROBHD 5 mm PABBO BB-  
PULPROG zgpg30  
TD 65536  
SOLVENT DMSO  
NS 2000  
DS 2  
SWH 30030.029 Hz  
FIDRES 0.458222 Hz  
AQ 1.0912410 sec  
RG 14596.5  
DW 16.650 usec  
DE 6.50 usec  
TE 299.1 K  
D1 2.00000000 sec  
D11 0.03000000 sec  
TD0 1

===== CHANNEL f1 =====  
NUC1 13C  
P1 20.00 usec  
PL1 -6.00 dB  
SFO1 125.7703643 MHz

===== CHANNEL f2 =====  
CPDPRG2 waltz16  
NUC2 1H  
PCPD2 80.00 usec  
PL2 -1.10 dB  
PL12 13.44 dB  
PL13 16.40 dB  
SFO2 500.1320005 MHz  
SI 32768  
SF 125.7577890 MHz  
WDW EM  
SSB 0  
LB 1.00 Hz  
GB 0  
PC 1.40

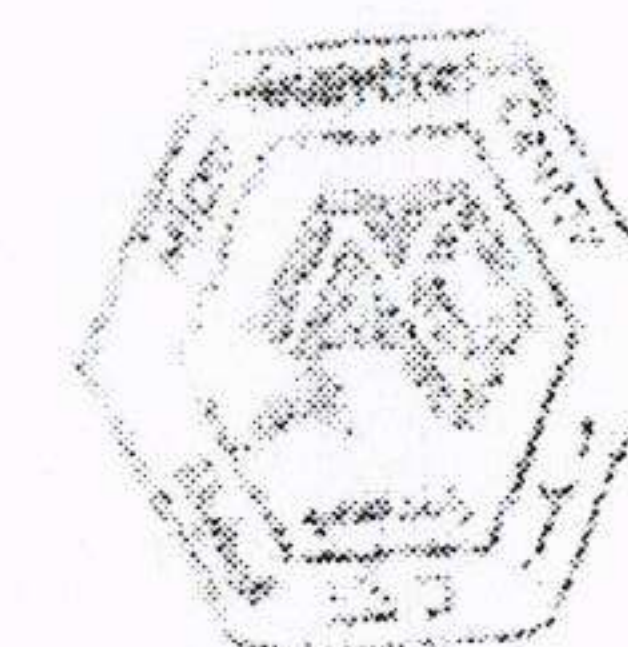



4-(2-Chloroquinolin-3-yl)-6-methyl-N-phenyl-2-thioxo-1,2,3,4-tetrahydropyrimidine-5-carboxamide

76

DN DMSO D:\ abar

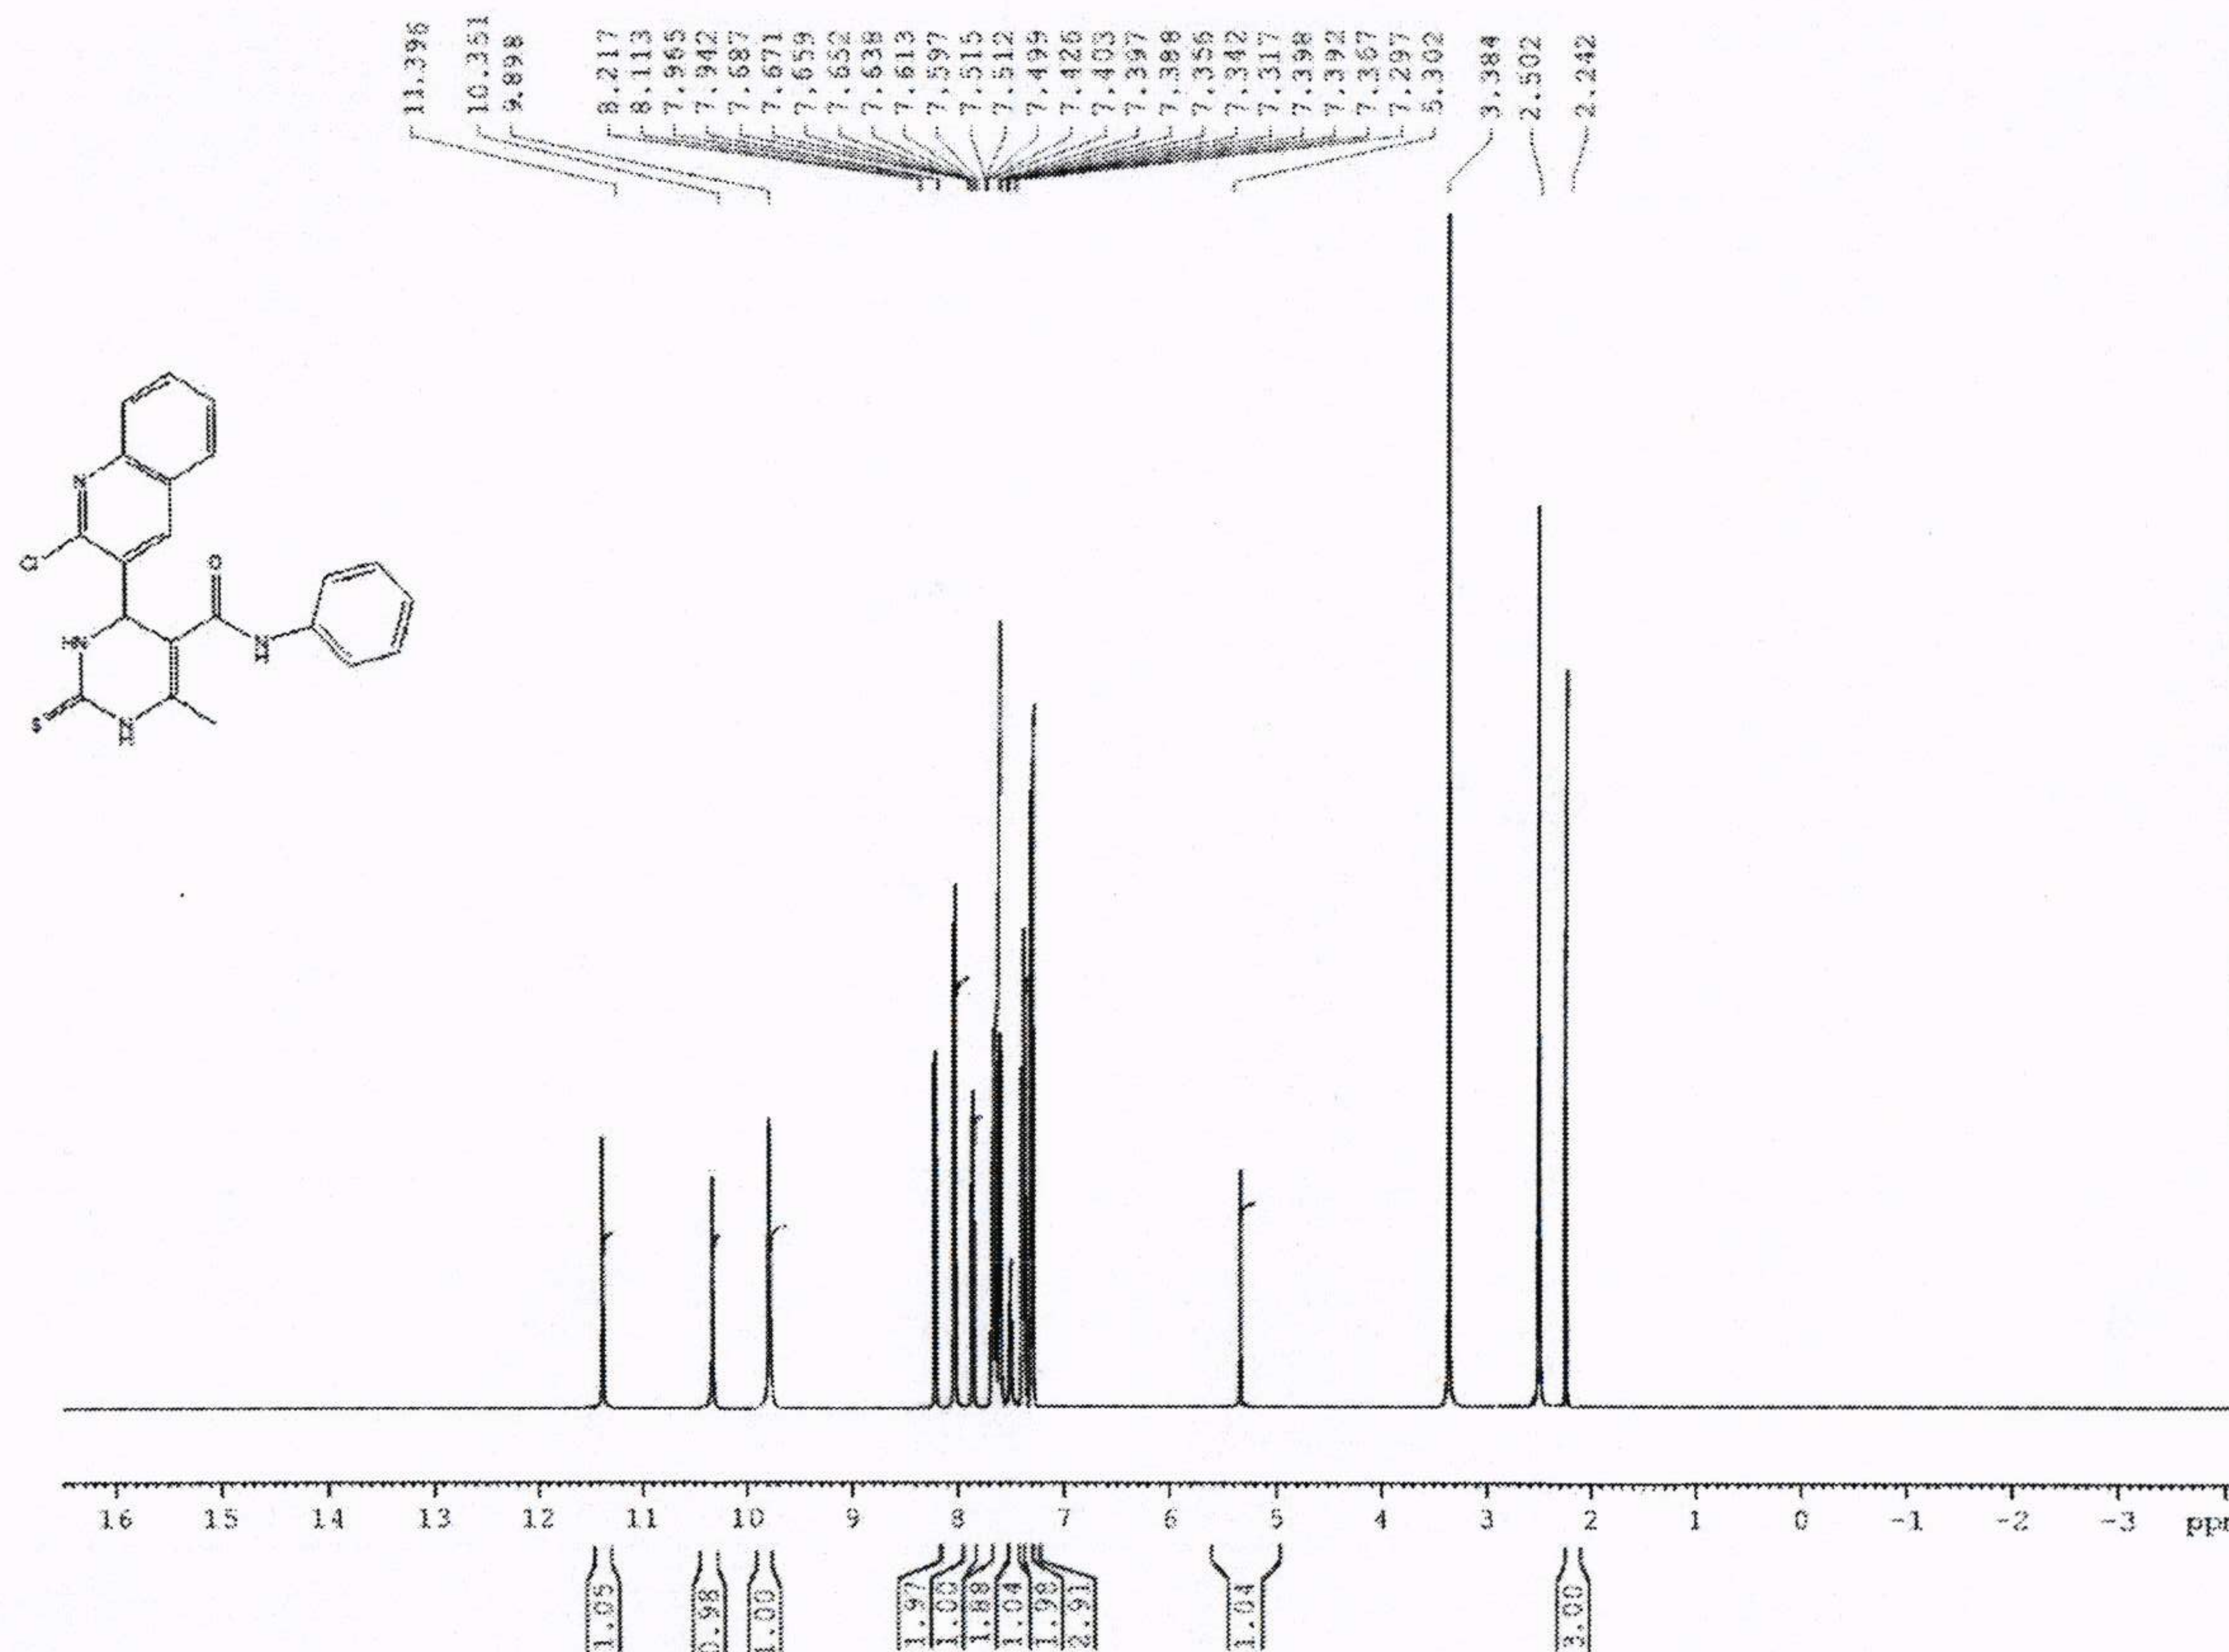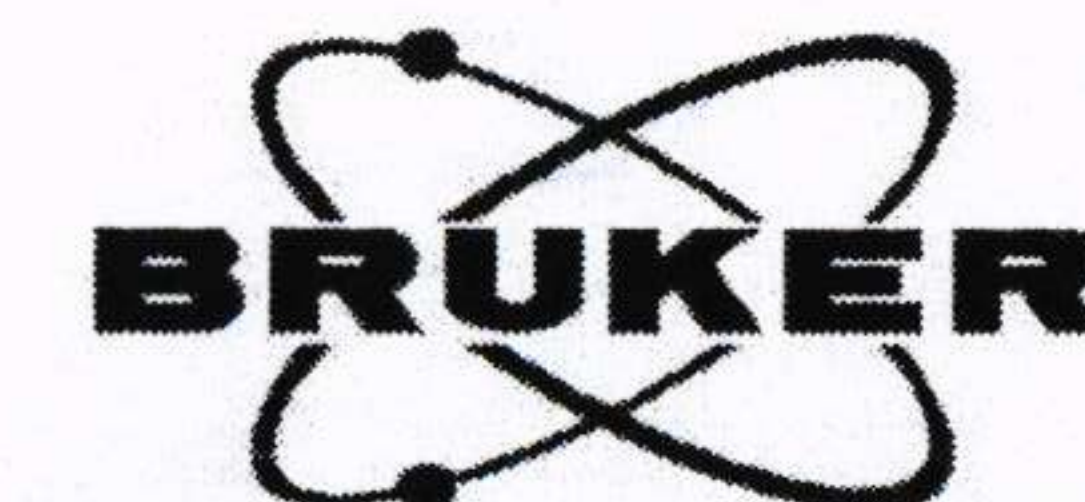

NAME drshahat-10  
EXPNO 10  
PROCNO 1  
Date\_ 20210624  
Time 18.59  
INSTRUM spect  
PROBHD 5 mm PABBO BB-  
PULPROG zg30  
TD 65536  
SOLVENT DMSO  
NS 16  
DS 2  
SWH 10330.578 Hz  
FIDRES 0.157632 Hz  
AQ 3.1720407 sec  
RG 90.5  
DW 48.400 usec  
DE 6.50 usec  
TE 298.3 K  
D1 1.00000000 sec  
TD0 1

===== CHANNEL f1 =====  
NUC1 1H  
P1 14.70 usec  
PL1 -1.10 dB  
SFO1 500.1330885 MHz  
SI 32768  
SF 500.1300000 MHz  
WDW EM  
SSB 0  
LB 0.30 Hz  
GB 0  
PC 1.00

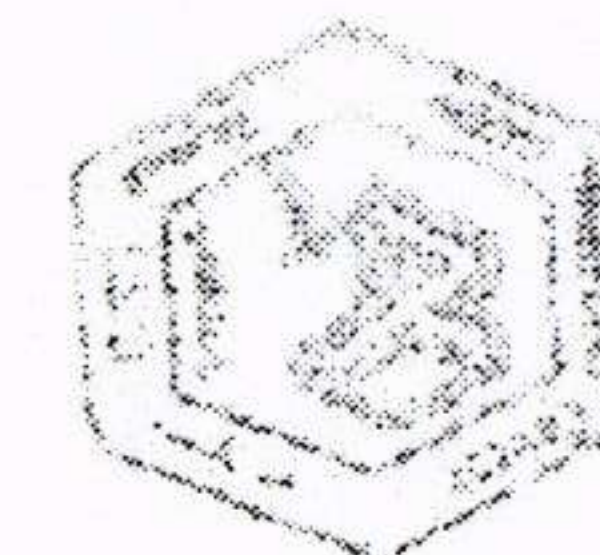



C13CPD32 DMSO D:\\ abari 46

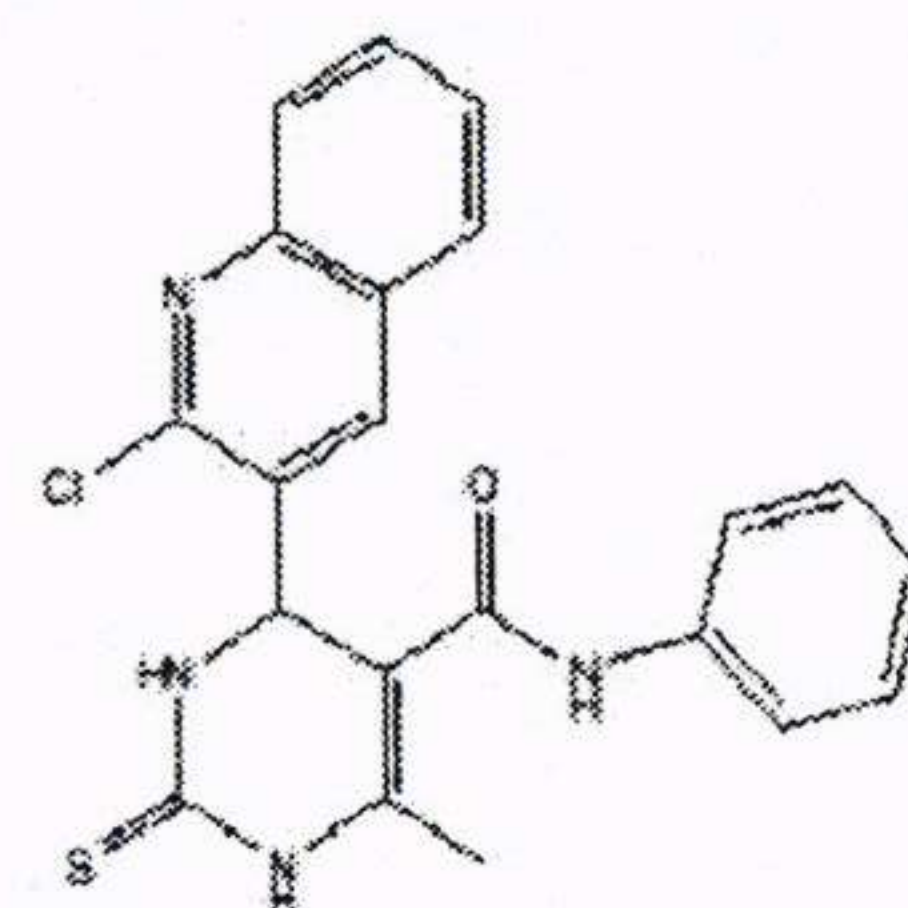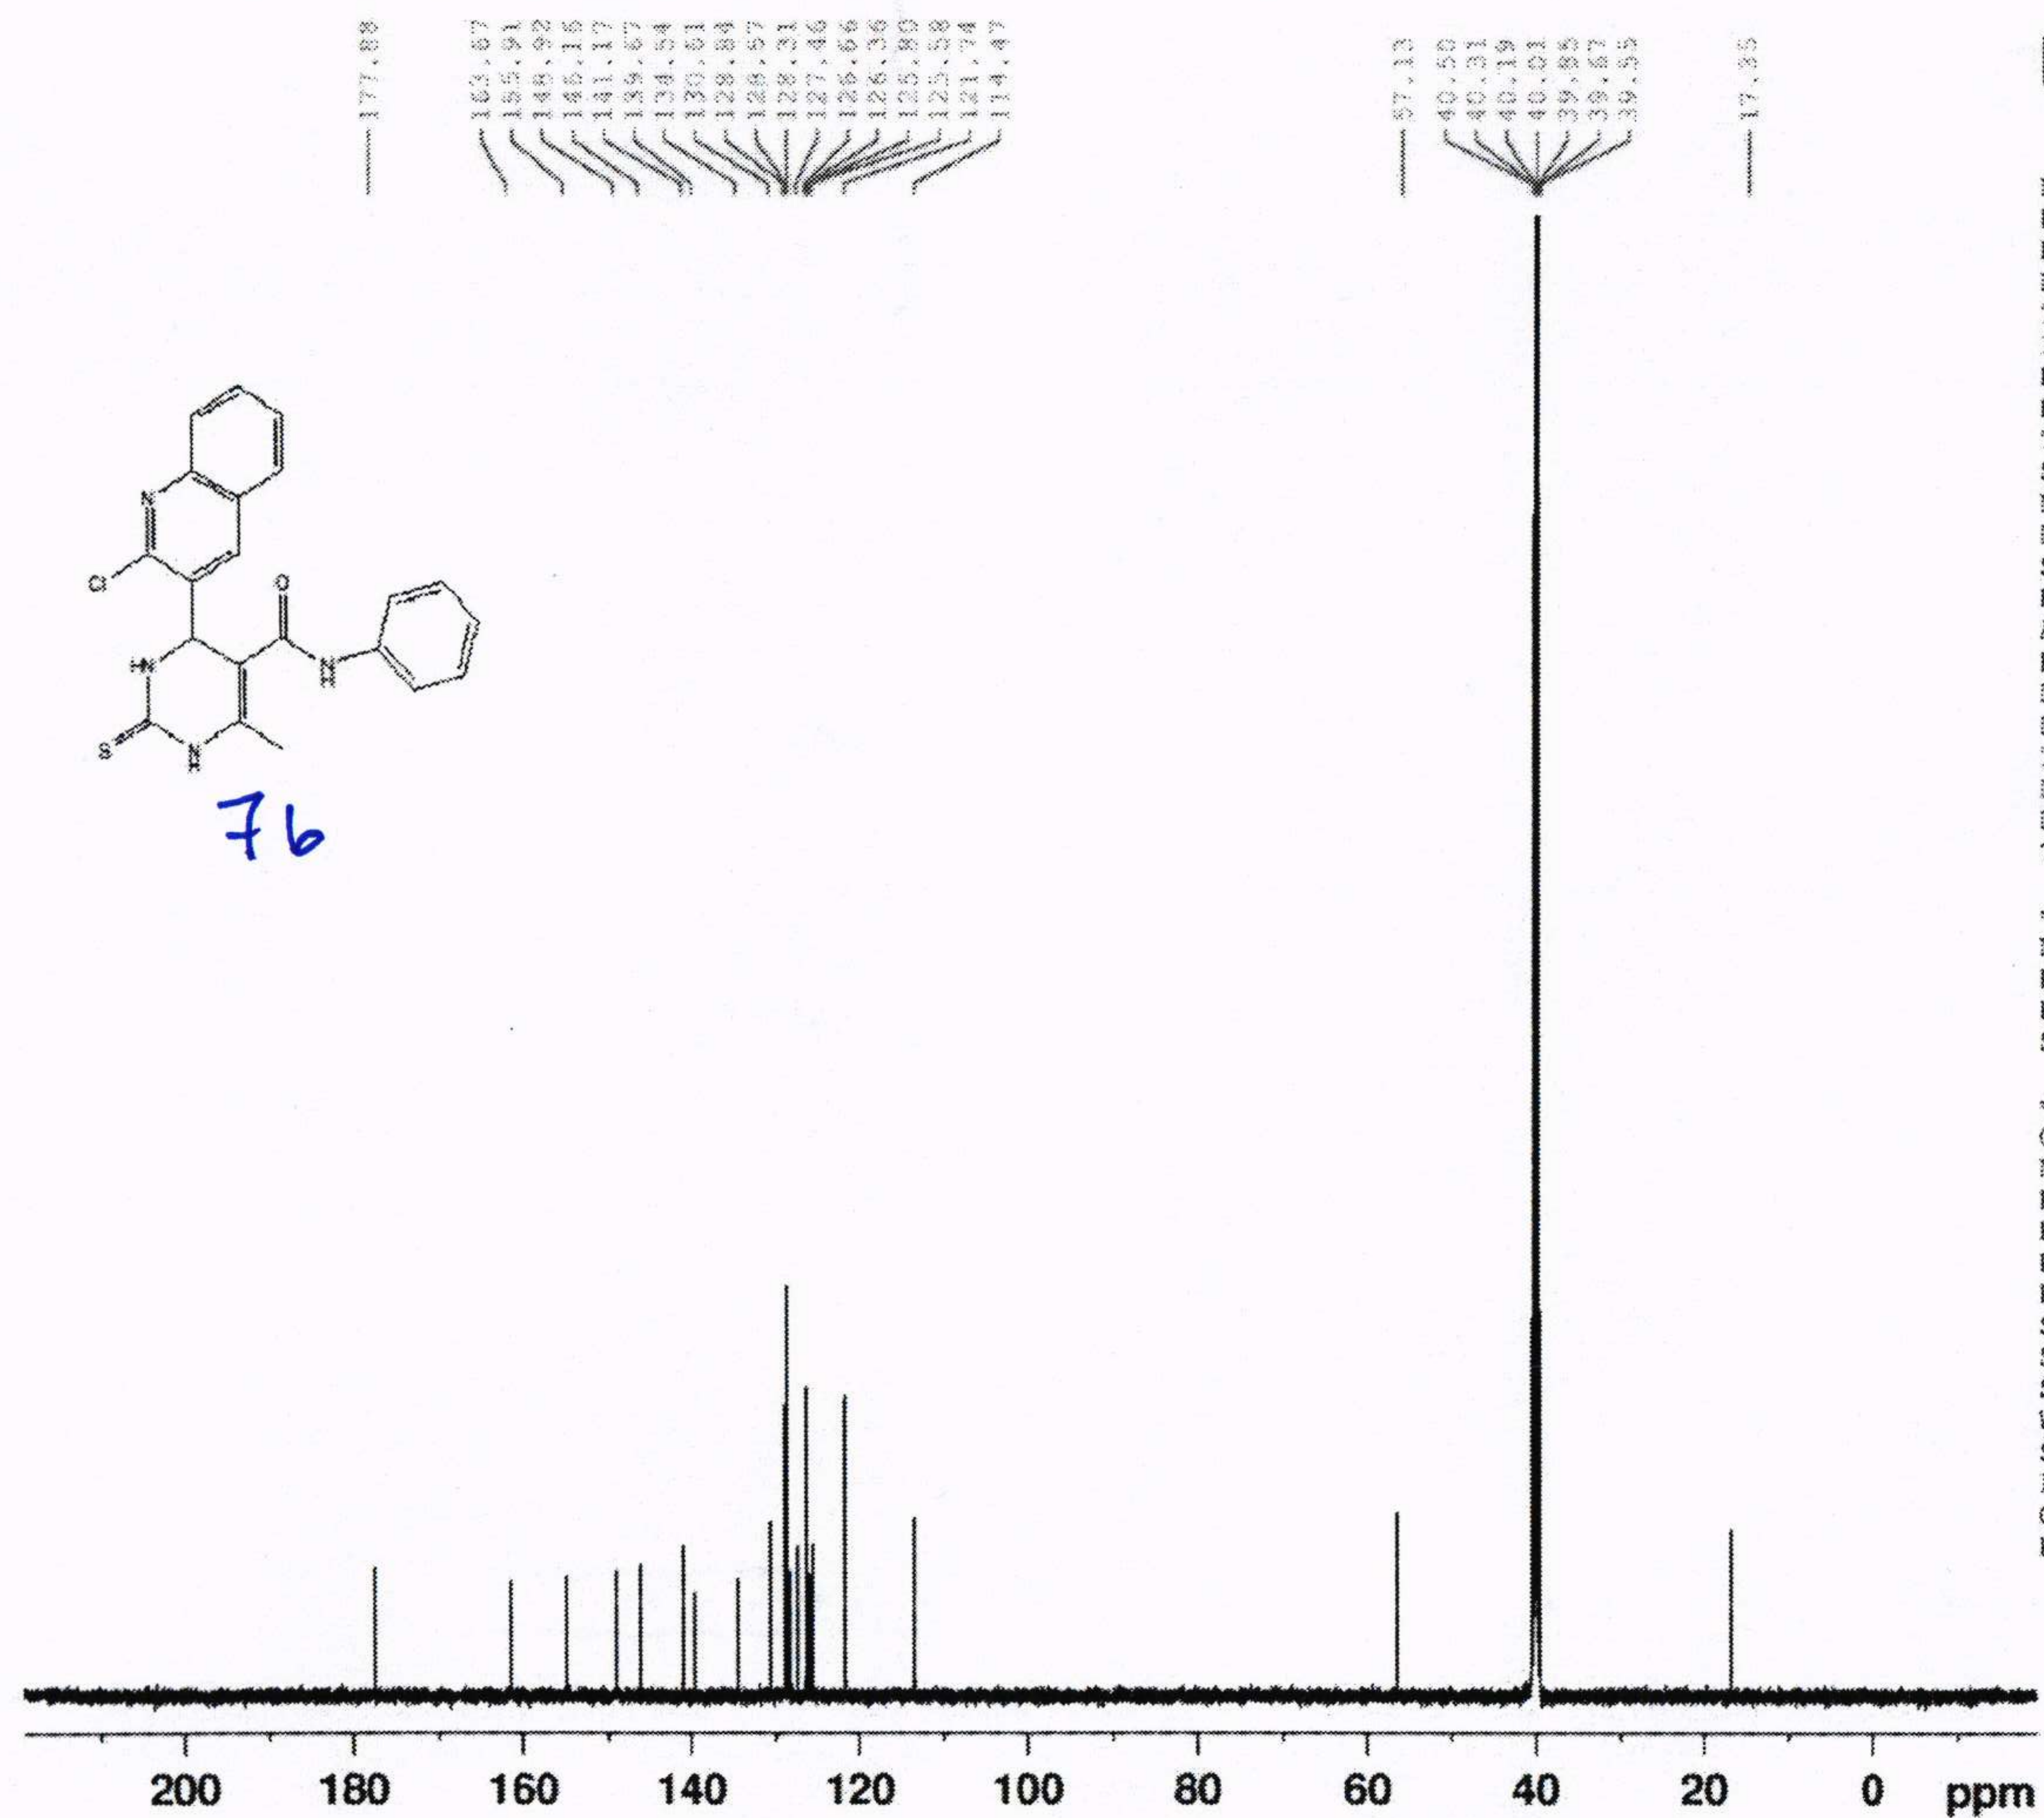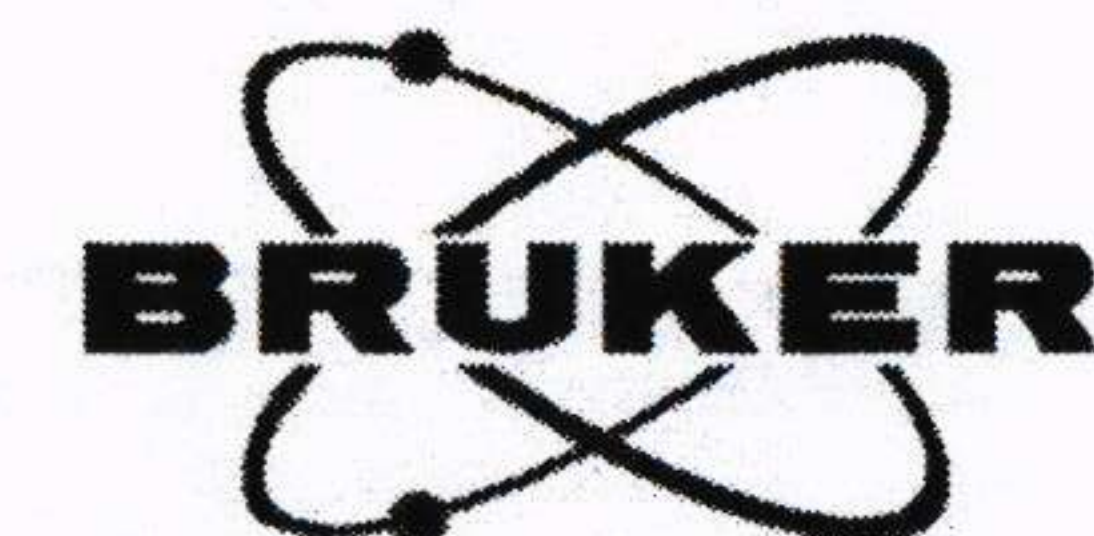

NAME drshahat-10  
 EXPNO 11  
 PROCNO 1  
 Date\_ 20210624  
 Time 20.47  
 INSTRUM spect  
 PROBHD 5 mm PABBO BB-  
 PULPROG zgpg30  
 TD 65536  
 SOLVENT DMSO  
 NS 2000  
 DS 2  
 SWH 30030.029 Hz  
 FIDRES 0.458222 Hz  
 AQ 1.0912410 sec  
 RG 14596.5  
 DW 16.650 usec  
 DE 6.50 usec  
 TE 299.1 K  
 D1 2.00000000 sec  
 D11 0.03000000 sec  
 TD0 1

===== CHANNEL f1 =====  
 NUC1 13C  
 P1 20.00 usec  
 PL1 -6.00 dB  
 SFO1 125.7703643 MHz

===== CHANNEL f2 =====  
 CPDPRG2 waltz16  
 NUC2 1H  
 PCPD2 80.00 usec  
 PL2 -1.10 dB  
 PL12 13.44 dB  
 PL13 16.40 dB  
 SFO2 500.1320005 MHz  
 SI 32768  
 SF 125.7577890 MHz  
 WDW EM  
 SSB 0  
 LB 1.00 Hz  
 GB 0  
 PC 1.40

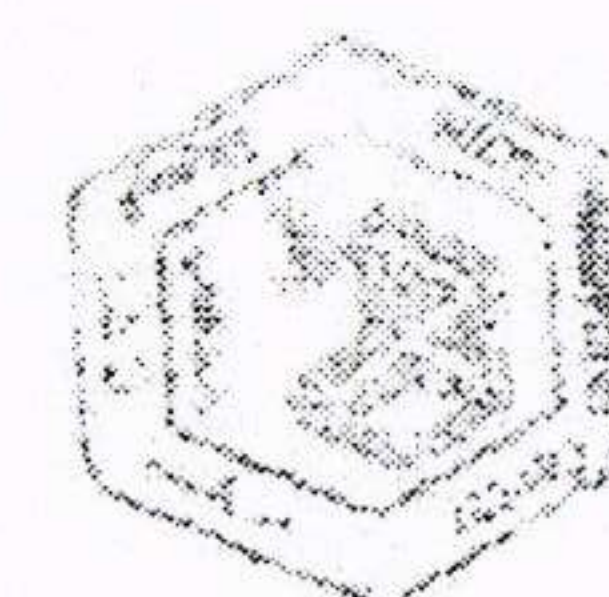



**Cairo University  
Micro Analytical Center**

**DI Analysis  
Shimadzu Qp-2010 Plus**

**Sample Information**  
 Analyzed by : Mai Younis  
 Analyzed : 22/05/2021 02:44:23 +  
 Sample Name : 10  
 Sample ID :  
 Customer Name : Dr. Moh P  
 Data File : C:\COMS\Solution\Data Project\21\QCD  
 Org Data File : C:\COMS\Solution\Data Project\21\QCD  
 Method File : C:\COMS\Solution\Data Project\21\QCD  
 Org Method File : C:\COMS\Solution\Data Project\21\QCD  
 Report File :  
 Tuning File : C:\COMS\Solution\System Tune1 \_default1.agr  
 Standard/Modified by : Mai Younis  
 Modified : 22/05/2021 02:49:22 +

**Method**  
 Analytical Line 1  
 IonSourceTemp : 250.00 °C  
 [MS Table]  
 -Group 1 - Event 1-  
 Start Time : 0.00min  
 End Time : 10.00min  
 ACQ Mode : Scan  
 Event Time : 0.50sec  
 Scan Speed : 1000  
 Start m/z : 50.00  
 End m/z : 500.00

**Electron Voltage** : 70 eV  
**Ionization Mode** : EI

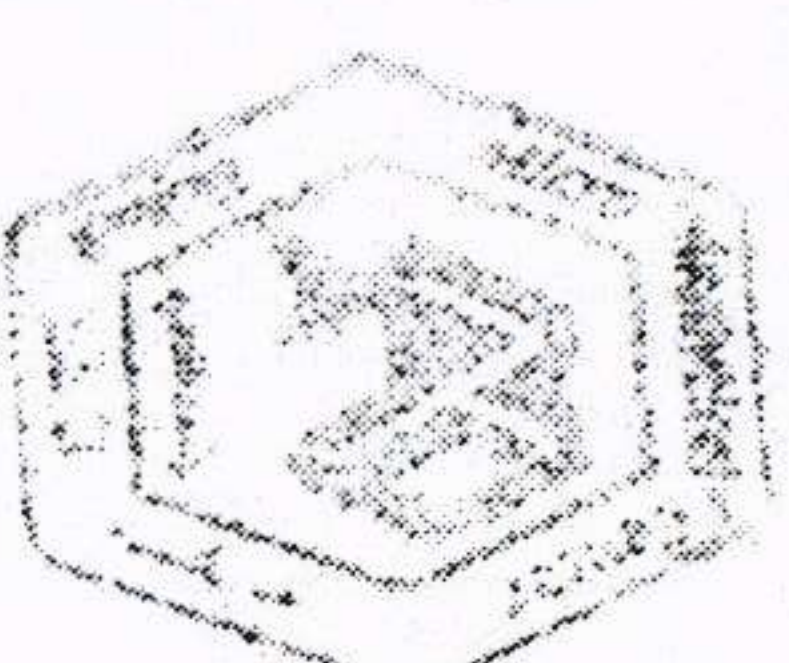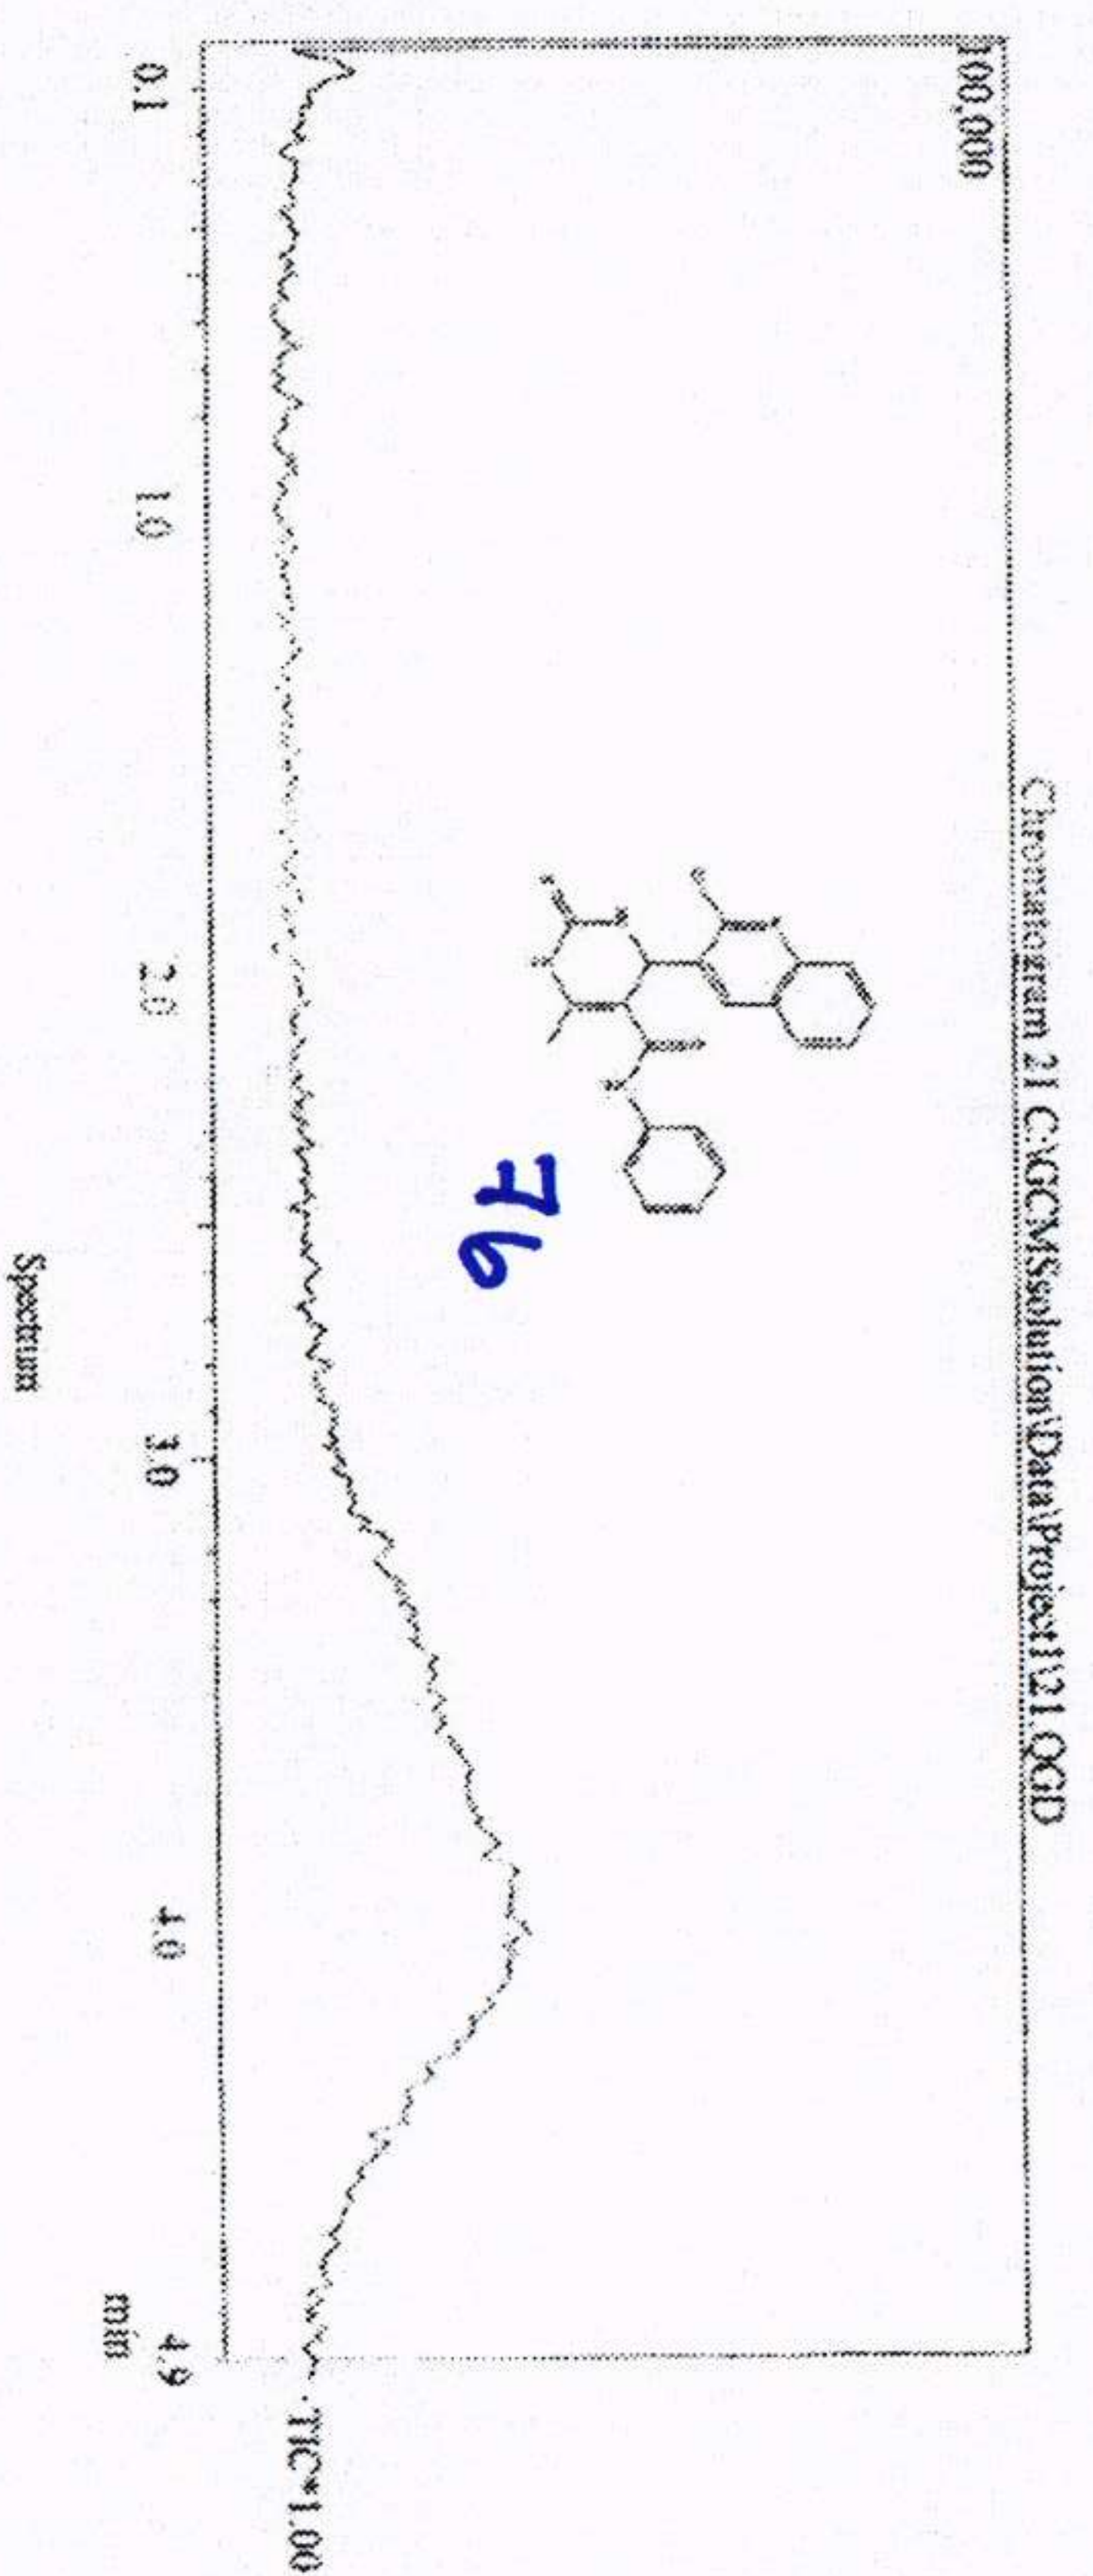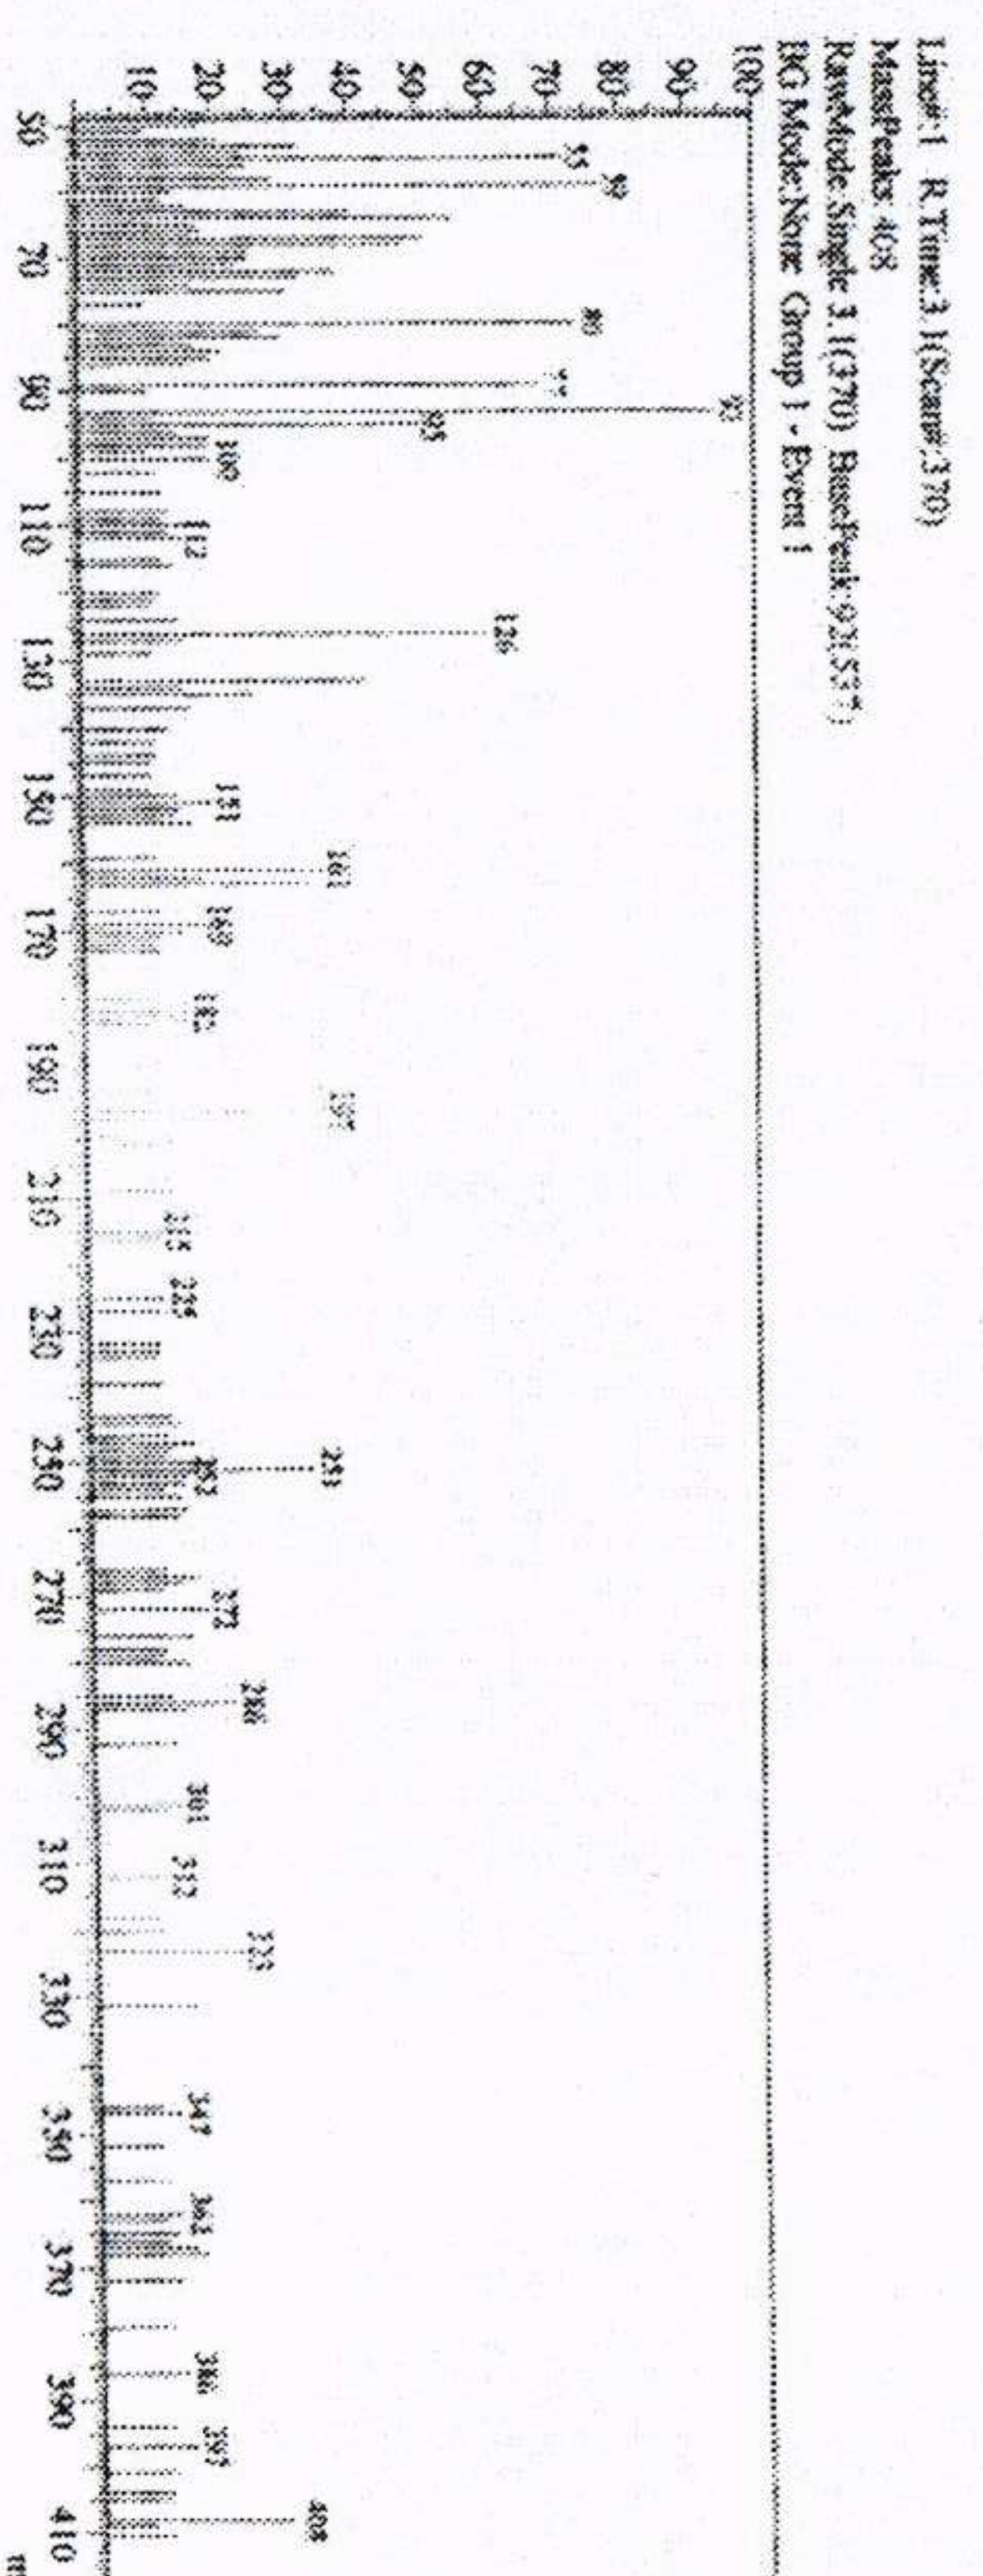

**Mass Table**  
 Line# 1 R Time:3.11(Scan#370)  
 MassPeaks: 408  
 RawMode: Single 3.1(370) BasePeak: 92(537)  
 BG Mode: None (Group 1 - Event 1)

| # | m/z   | Abs. In | Rel. Int. | # | m/z   | Abs. In | Rel. Int. | # | m/z   | Abs. In | Rel. Int. |
|---|-------|---------|-----------|---|-------|---------|-----------|---|-------|---------|-----------|
| 1 | 50.00 | 97      | 18.06     | 4 | 53.00 | 177     | 32.96     | 7 | 56.00 | 135     | 25.14     |
| 2 | 51.00 | 52      | 9.68      | 5 | 54.00 | 127     | 23.65     | 8 | 57.00 | 122     | 22.72     |
| 3 | 52.00 | 110     | 20.48     | 6 | 55.00 | 386     | 71.88     | 9 | 58.00 | 154     | 28.68     |



4-(1,3-Diphenyl-1H-pyrazol-4-yl)-6-methyl-N-phenyl-2-thioxo-1,2,3,4-tetrahydropyrimidine-5-carboxamide

7c

DN DMSO D:\ abar

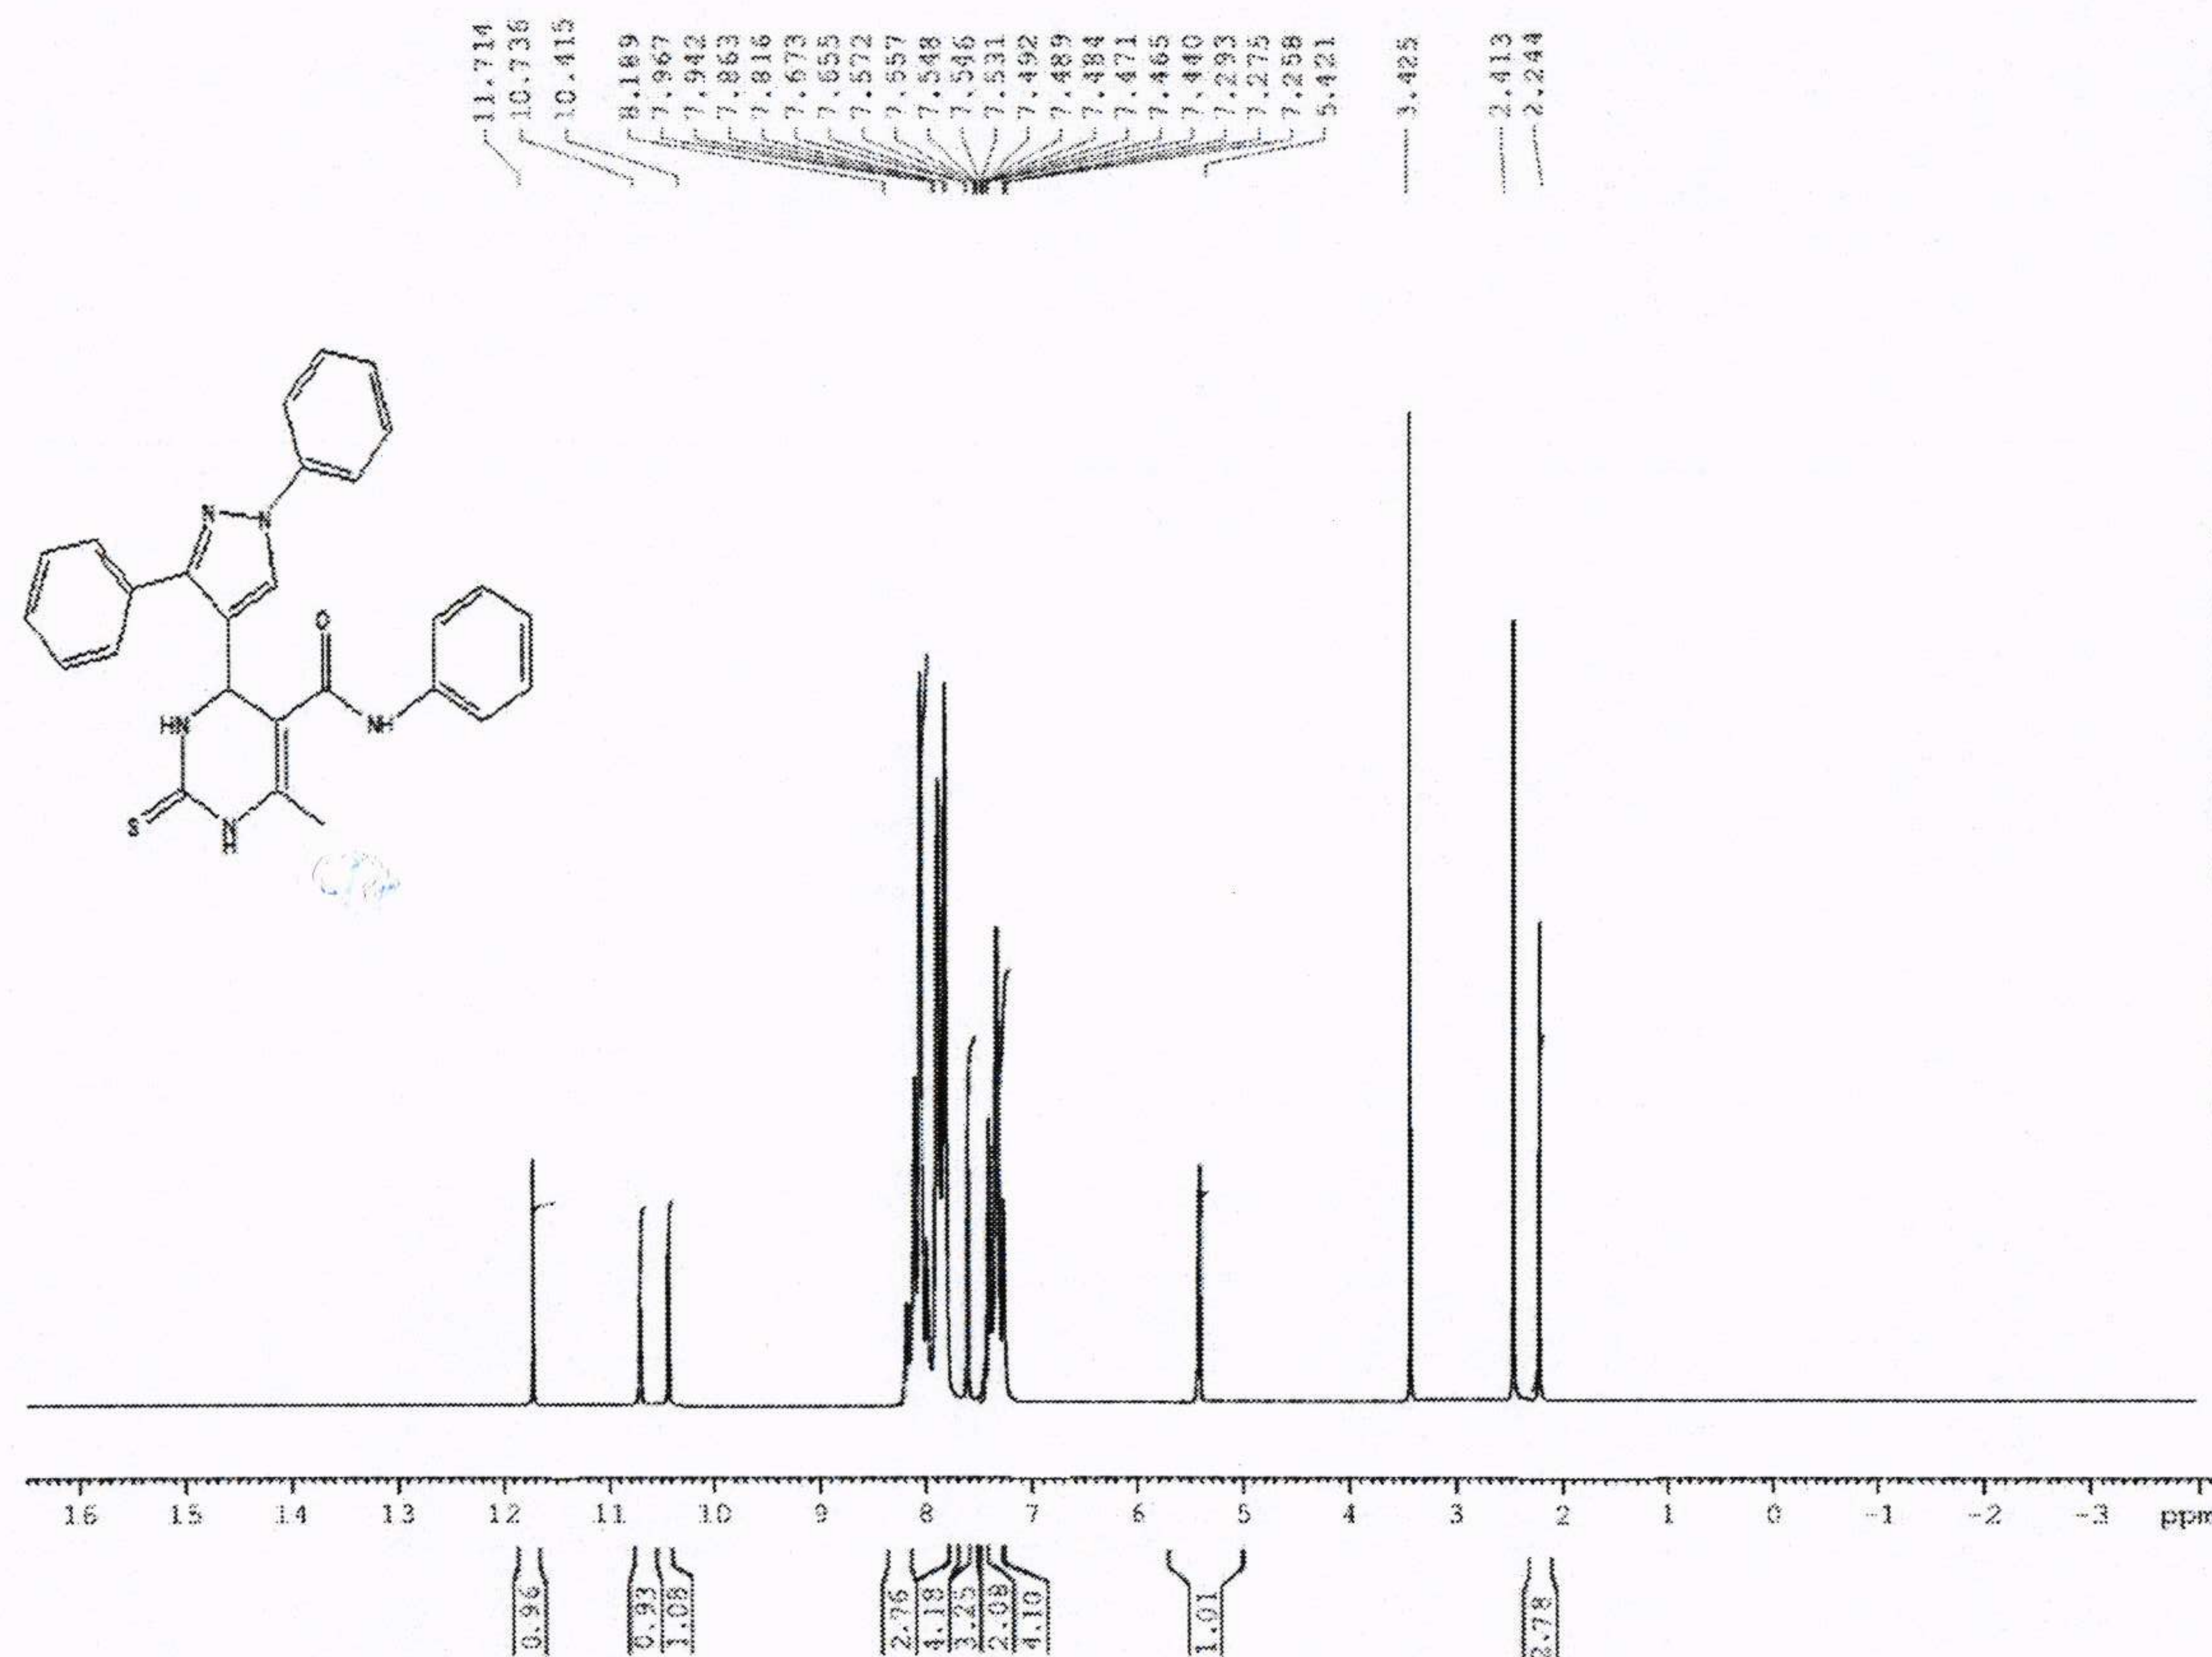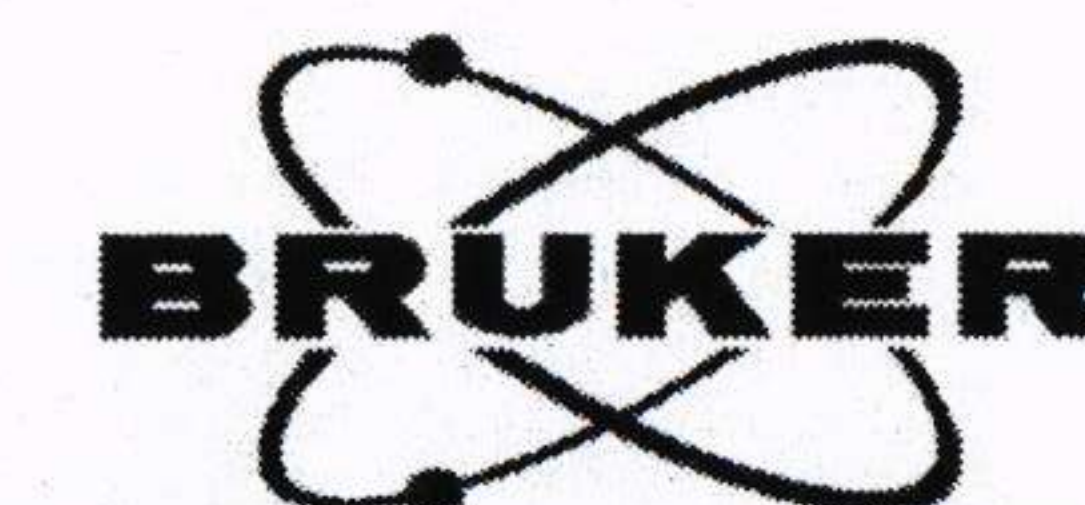

NAME drshahat-12  
EXPNO 10  
PROCNO 1  
Date\_ 20210624  
Time 11.17  
INSTRUM spect  
PROBHD 5 mm PABBO BB-  
PULPROG zg30  
TD 65536  
SOLVENT DMSO  
NS 16  
DS 2  
SWH 10330.578 Hz  
FIDRES 0.157632 Hz  
AQ 3.1720407 sec  
RG 128  
DW 48.400 usec  
DE 6.50 usec  
TE 298.3 K  
D1 1.00000000 sec  
TD0 1

===== CHANNEL f1 =====  
NUC1 1H  
P1 14.70 usec  
PL1 -1.10 dB  
SFO1 500.1330885 MHz  
SI 32768  
SF 500.1300000 MHz  
WDW EM  
SSB 0  
LB 0.30 Hz  
GB 0  
PC 1.00

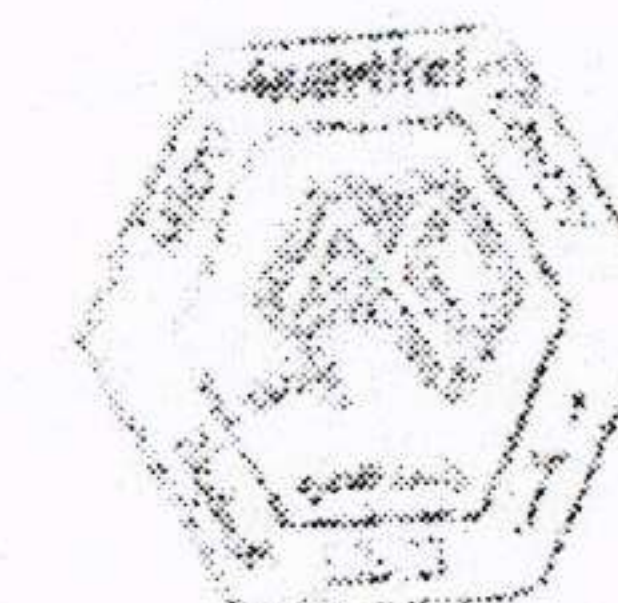



C13CPD32 DMSO D:\\ abari 44

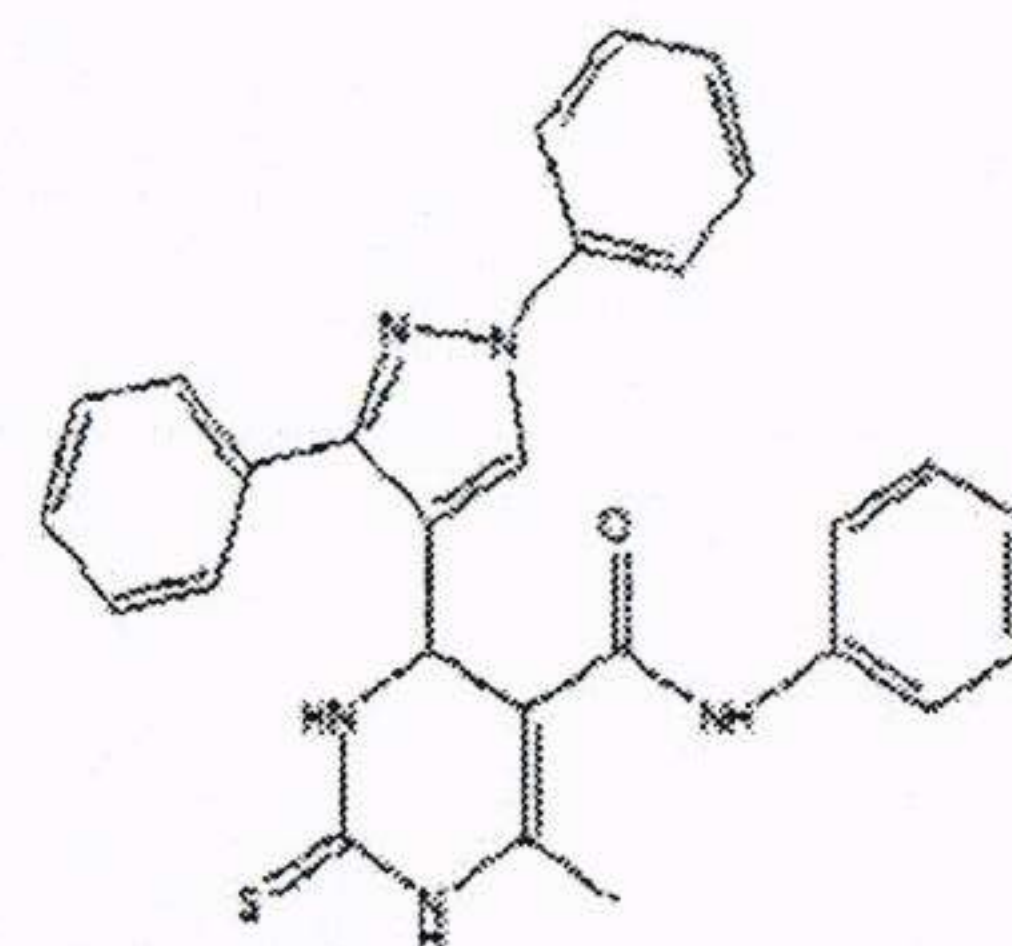

7c

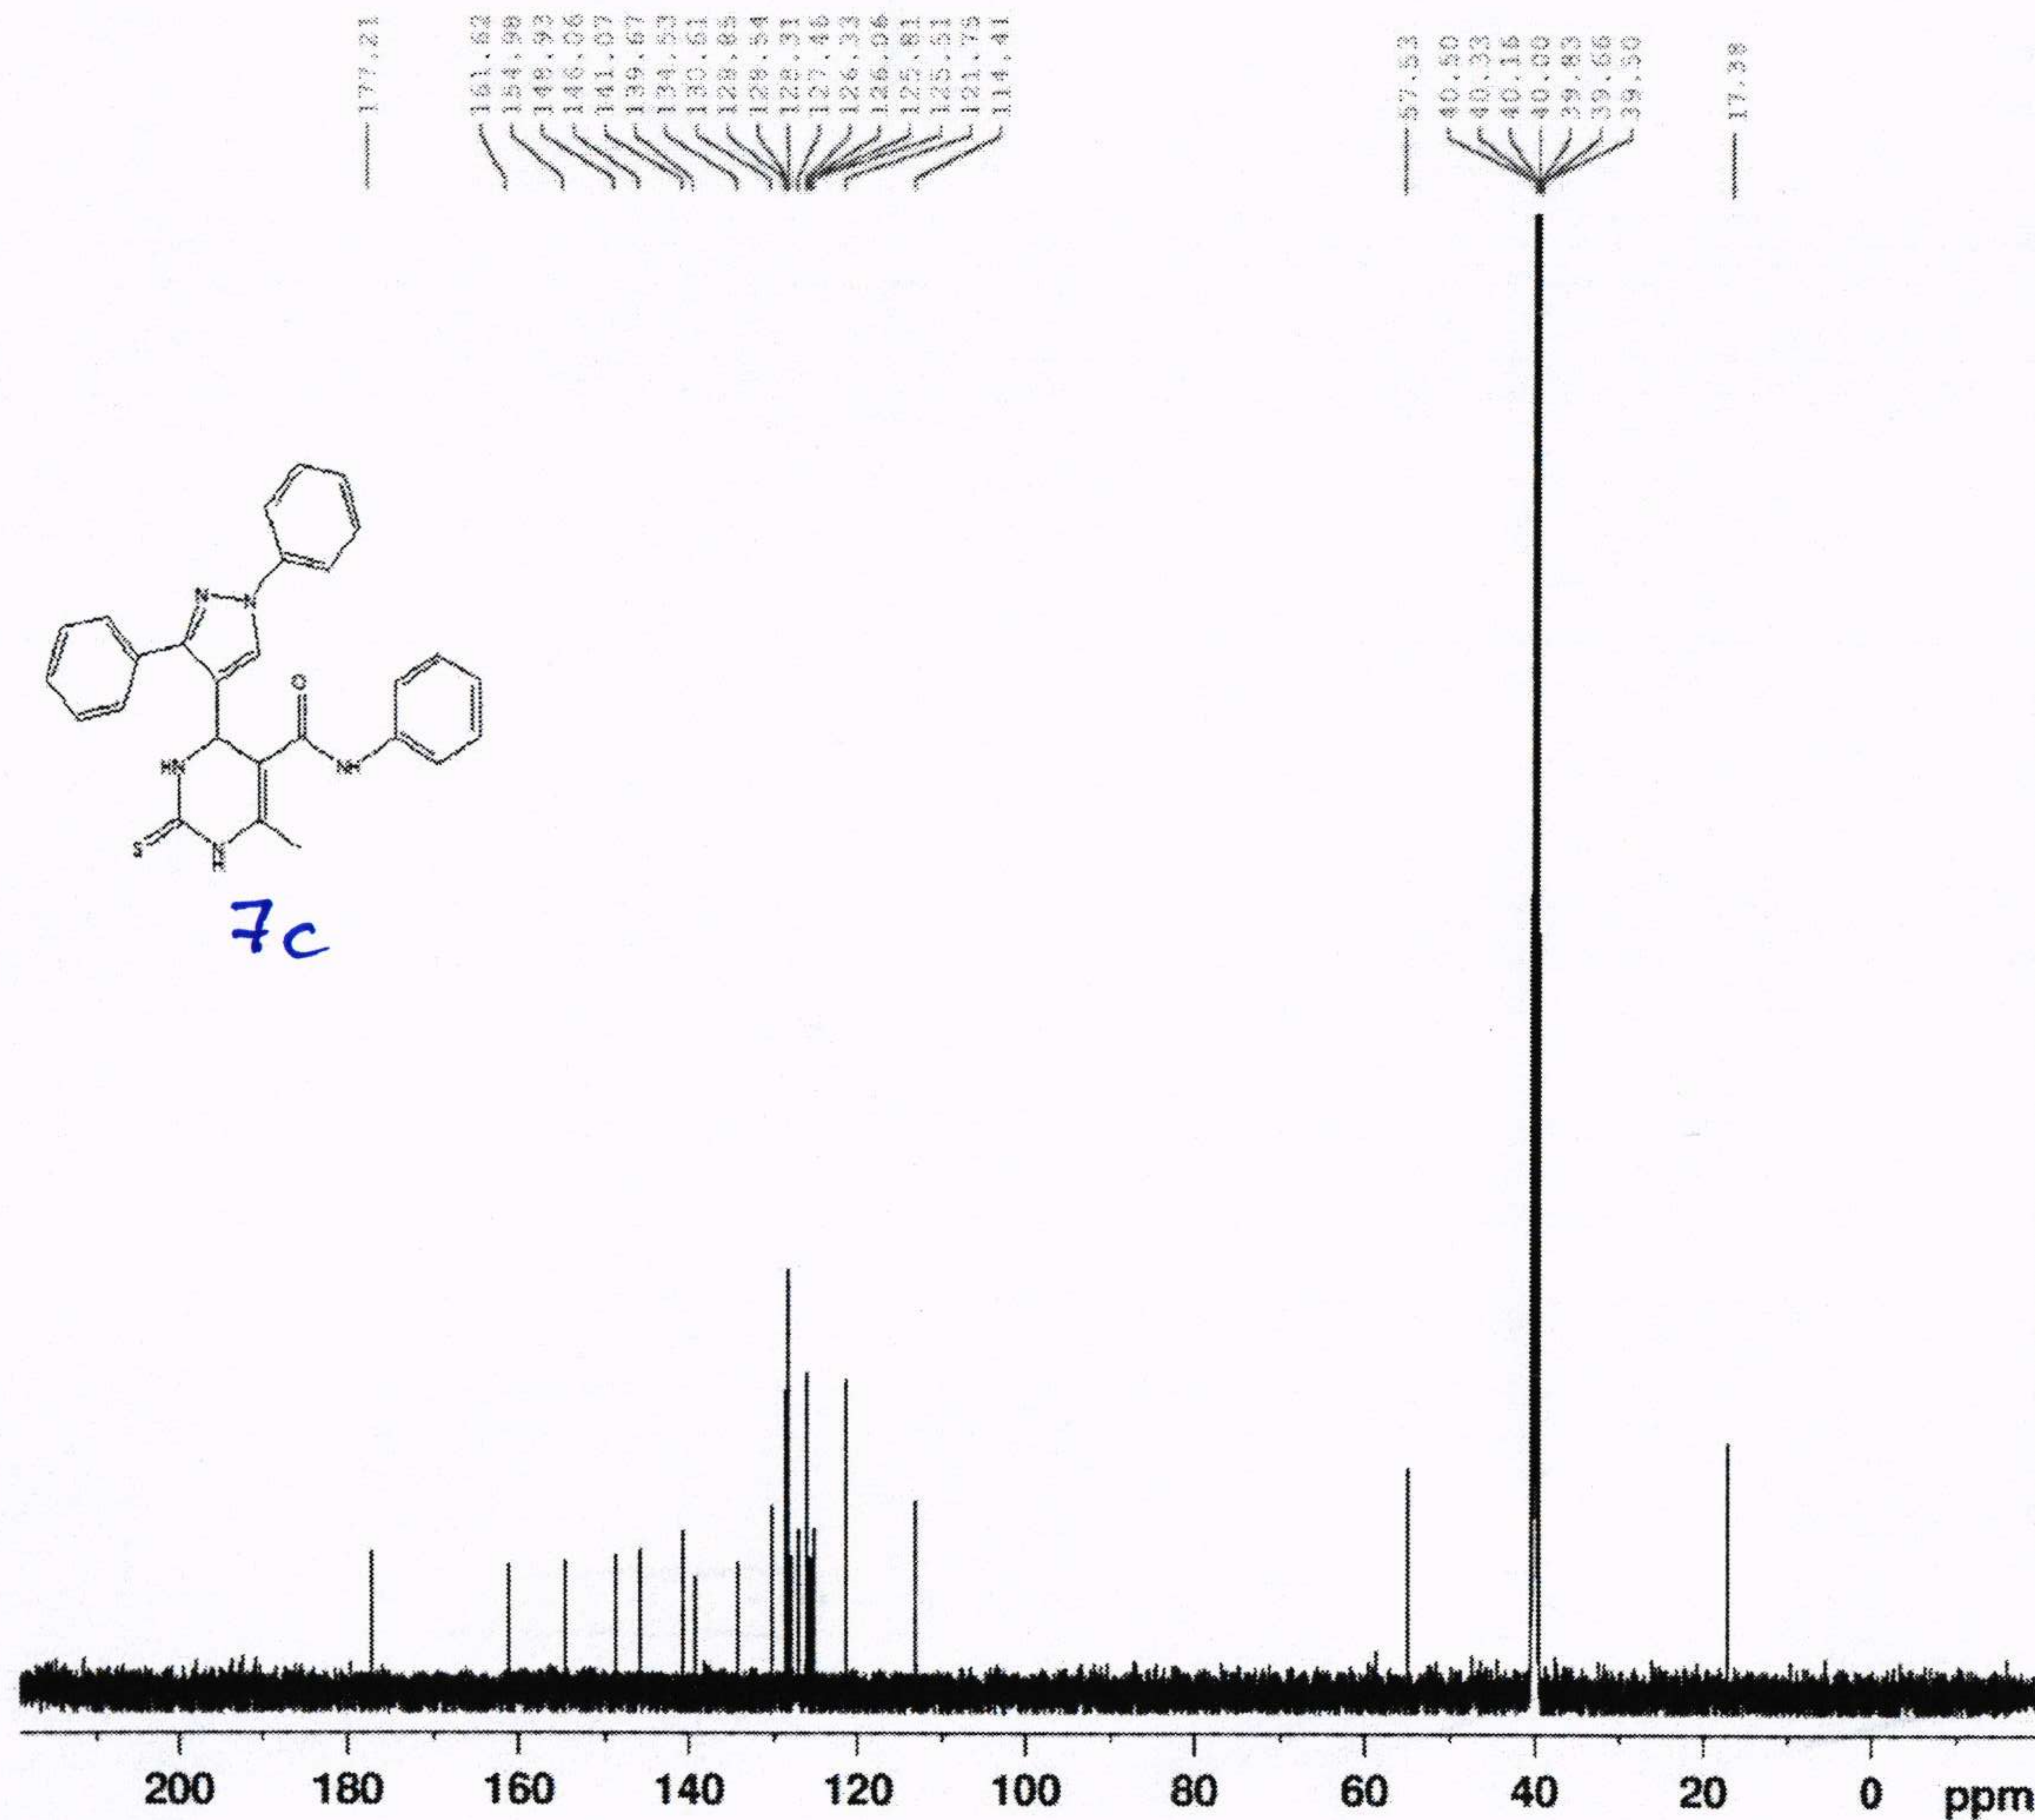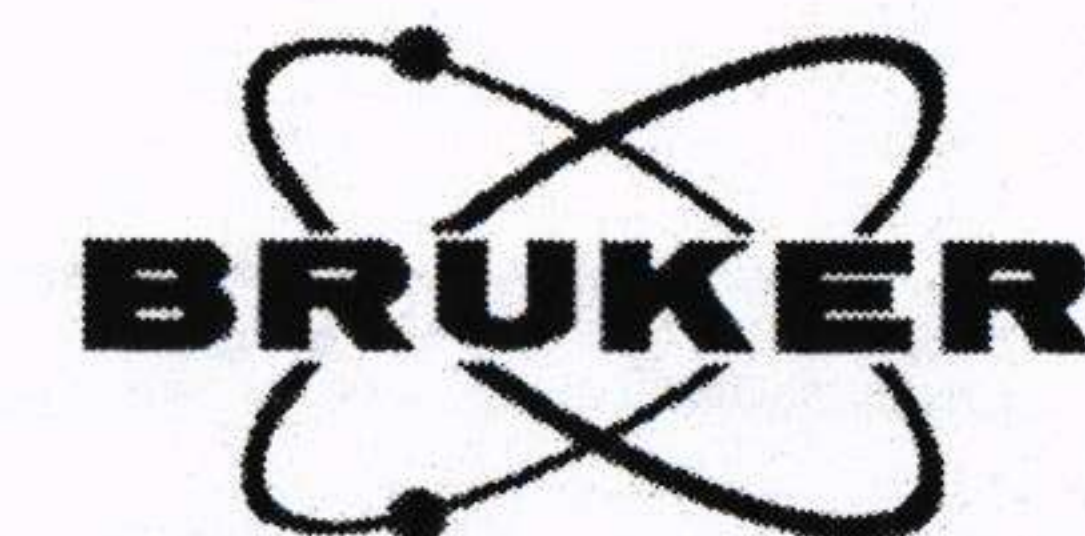

NAME drshahat-12  
EXPNO 11  
PROCNO 1  
Date\_ 20210624  
Time 12.07  
INSTRUM spect  
PROBHD 5 mm PABBO BB-  
PULPROG zgpg30  
TD 65536  
SOLVENT DMSO  
NS 1165  
DS 2  
SWH 30030.029 Hz  
FIDRES 0.458222 Hz  
AQ 1.0912410 sec  
RG 4597.6  
DW 16.650 usec  
DE 6.50 usec  
TE 299.2 K  
D1 2.00000000 sec  
D11 0.03000000 sec  
TD0 1

===== CHANNEL f1 =====  
NUC1 13C  
P1 20.00 usec  
PL1 -6.00 dB  
SFO1 125.7703643 MHz

===== CHANNEL f2 =====  
CPDPRG2 waltz16  
NUC2 1H  
PCPD2 80.00 usec  
PL2 -1.10 dB  
PL12 13.44 dB  
PL13 16.40 dB  
SFO2 500.1320005 MHz  
SI 32768  
SF 125.7577890 MHz  
WDW EM  
SSB 0  
LB 1.00 Hz  
GB 0  
PC 1.40

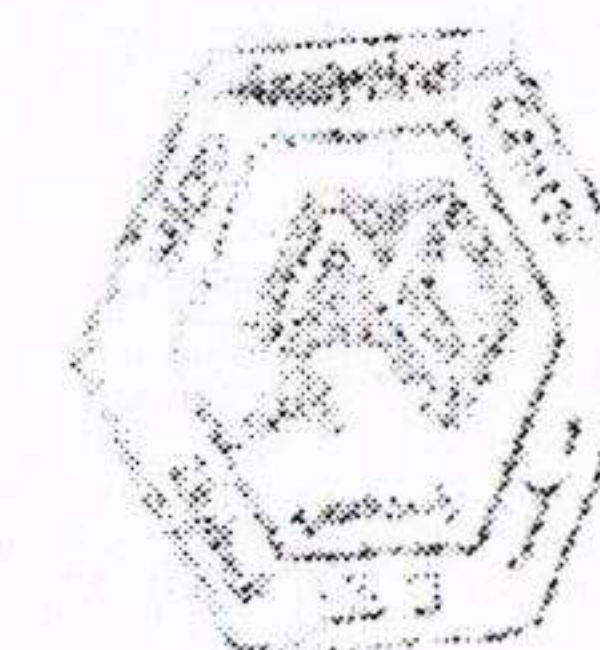



4-(1H-Indol-3-yl)-6-methyl-2-thioxo-N-p-tolyl-1,2,3,4-tetrahydropyrimidine-5-carboxamide

8a

DN DMSO D:\ abar

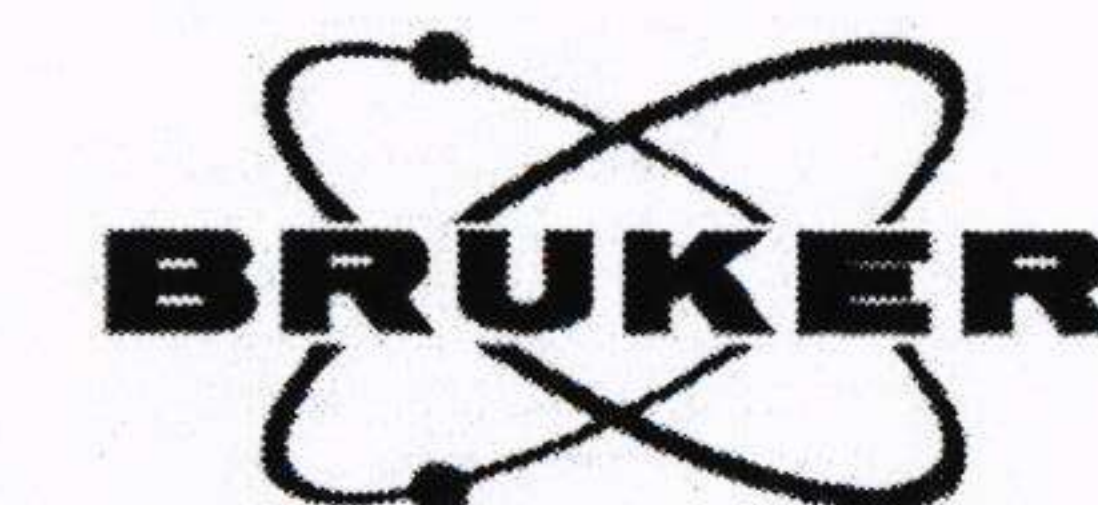

NAME drshahat-14  
EXPNO 10  
PROCNO 1  
Date\_ 20210624  
Time 18.59  
INSTRUM spect  
PROBHD 5 mm PABBO BB-  
PULPROG zg30  
TD 65536  
SOLVENT DMSO  
NS 16  
DS 2  
SWH 10330.578 Hz  
FIDRES 0.157632 Hz  
AQ 3.1720407 sec  
RG 90.5  
DW 48.400 usec  
DE 6.50 usec  
TE 298.3 K  
D1 1.00000000 sec  
TD0 1

===== CHANNEL f1 =====  
NUC1 1H  
P1 14.70 usec  
PL1 -1.10 dB  
SFO1 500.1330885 MHz  
SI 32768  
SF 500.1300000 MHz  
WDW EM  
SSB 0  
LB 0.30 Hz  
GB 0  
PC 1.00

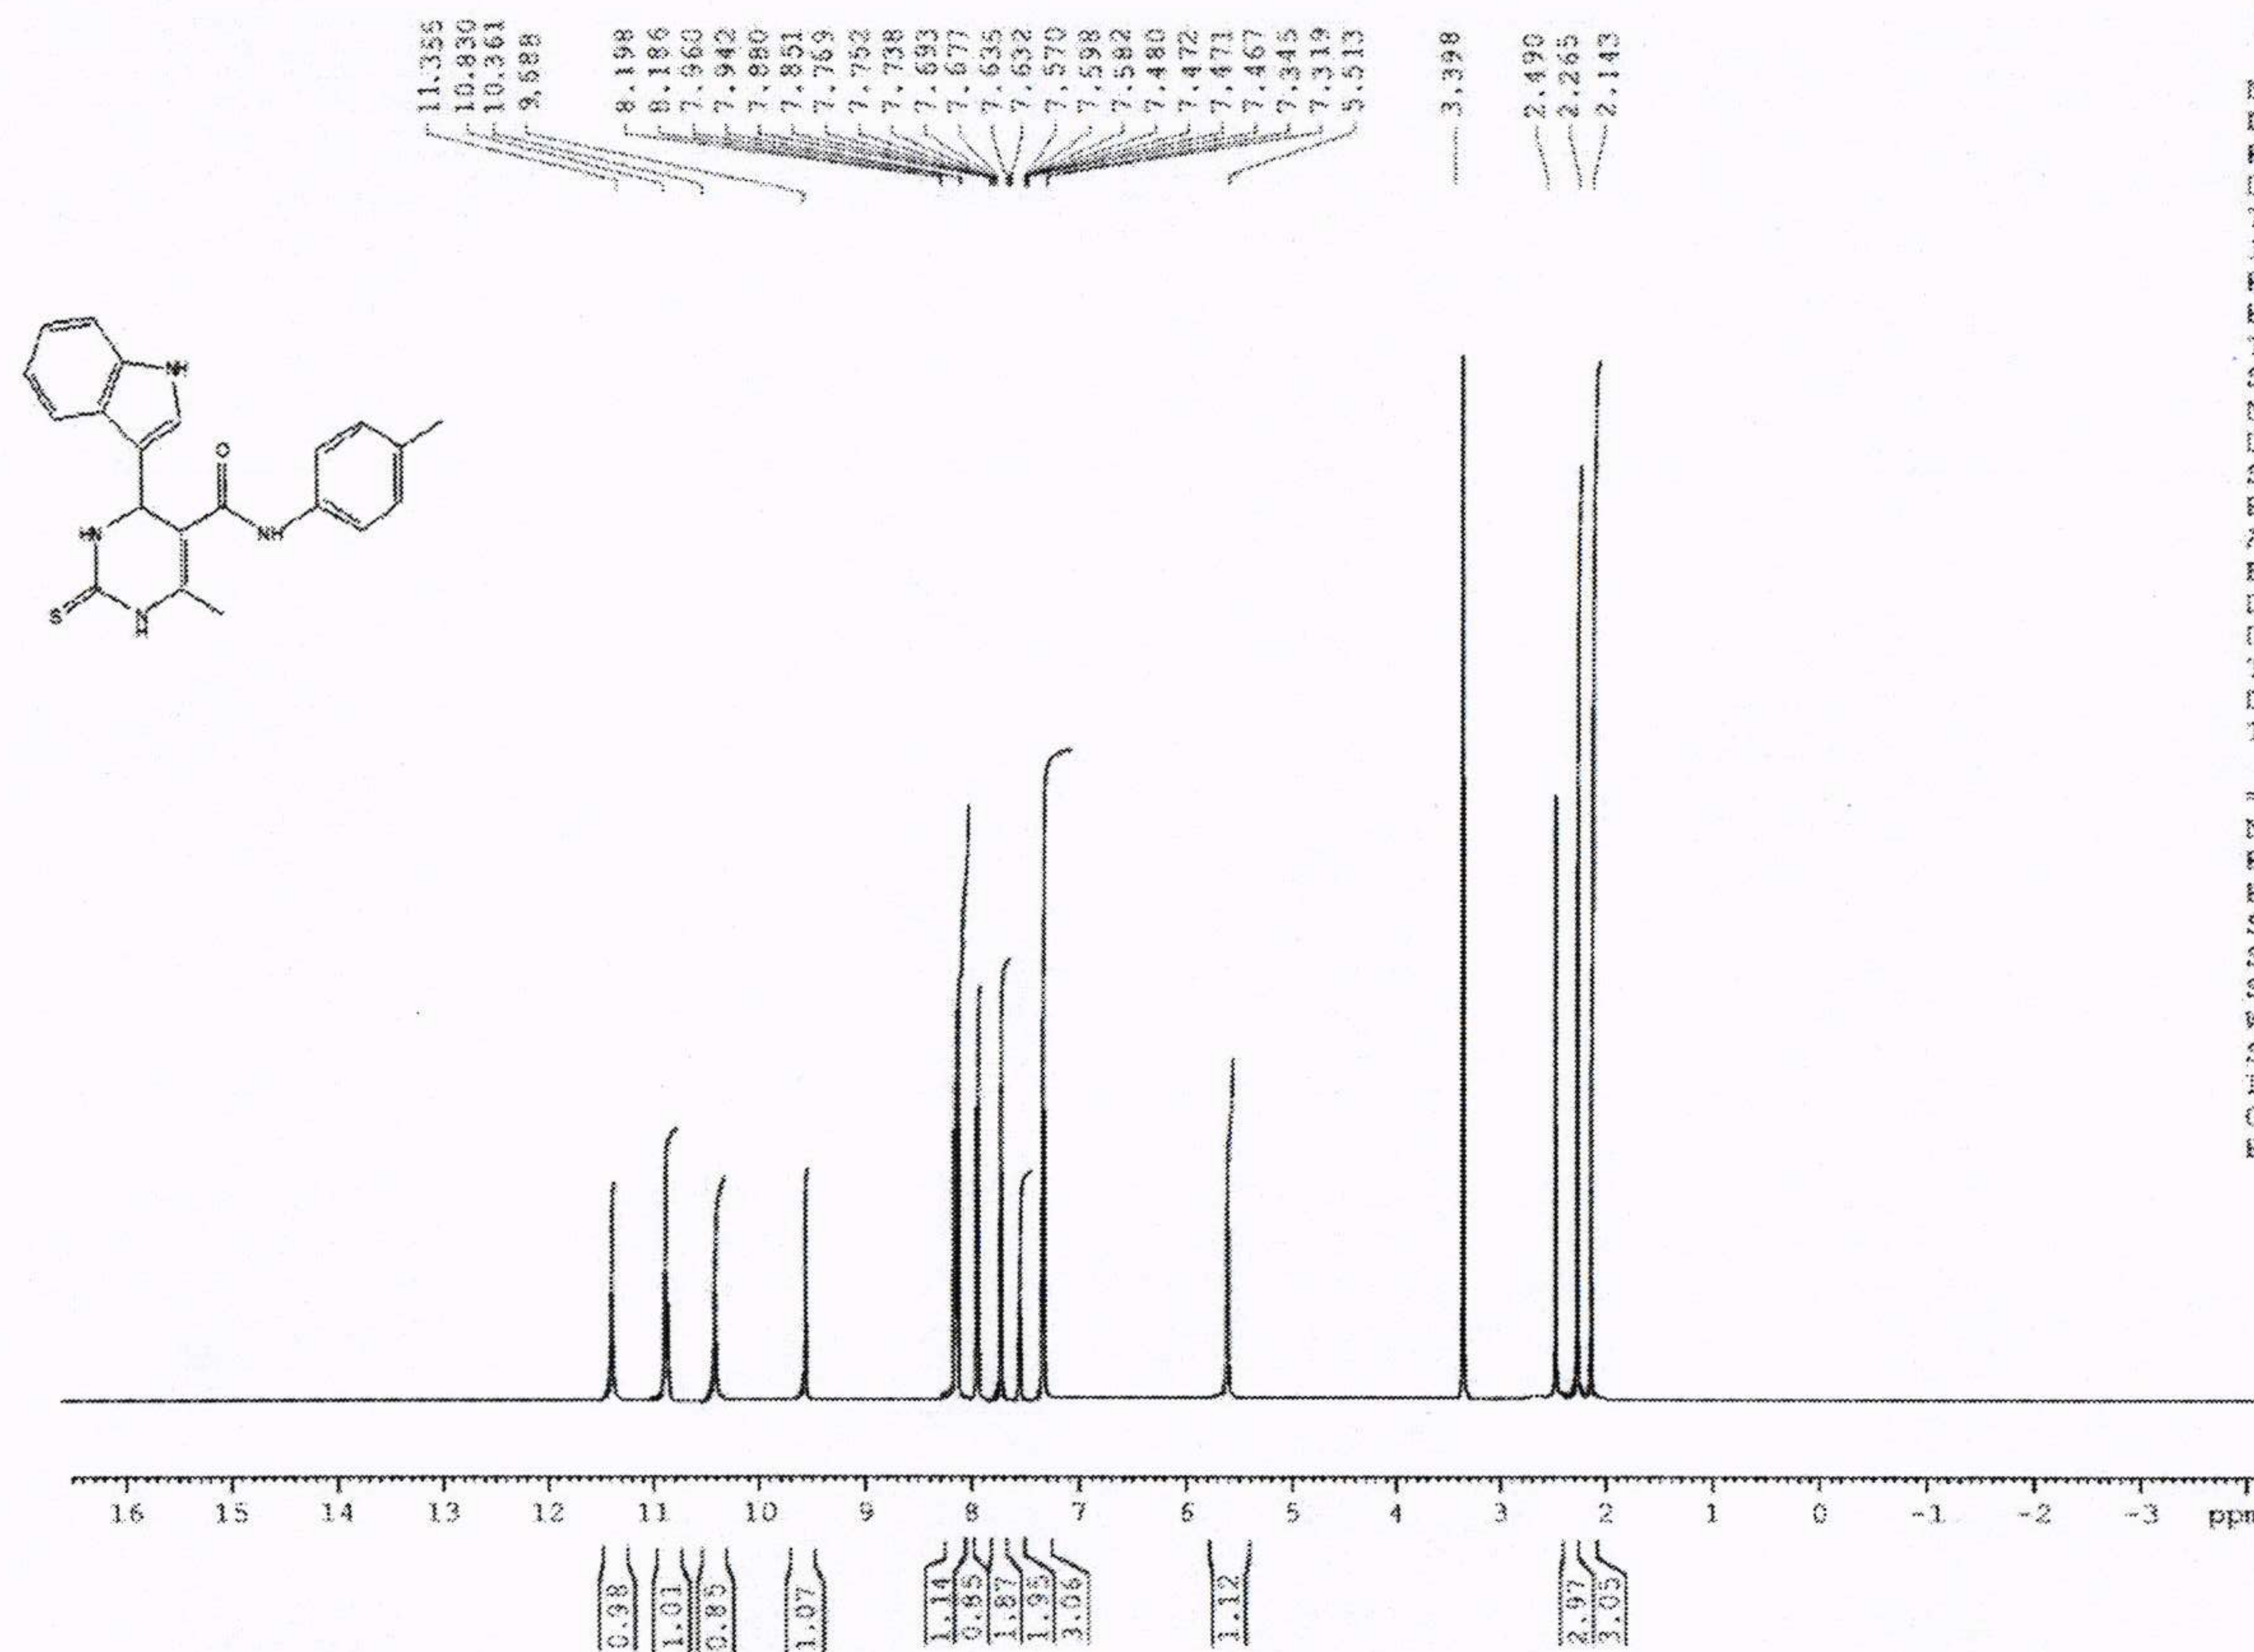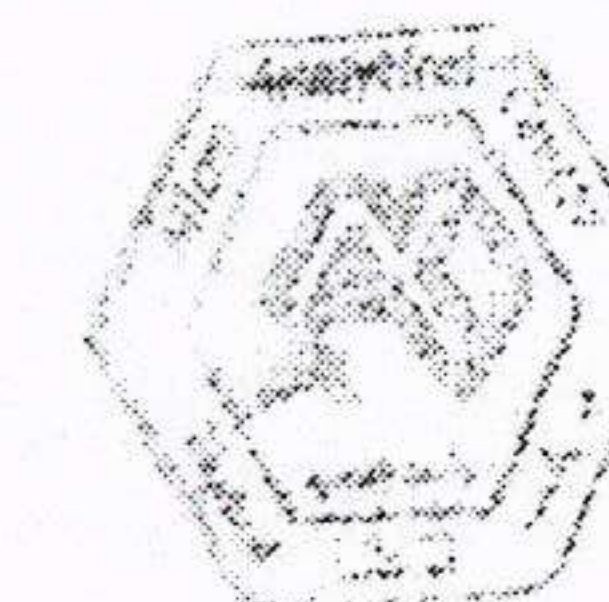



C13CPD32 DMSO D:\\ abari 46

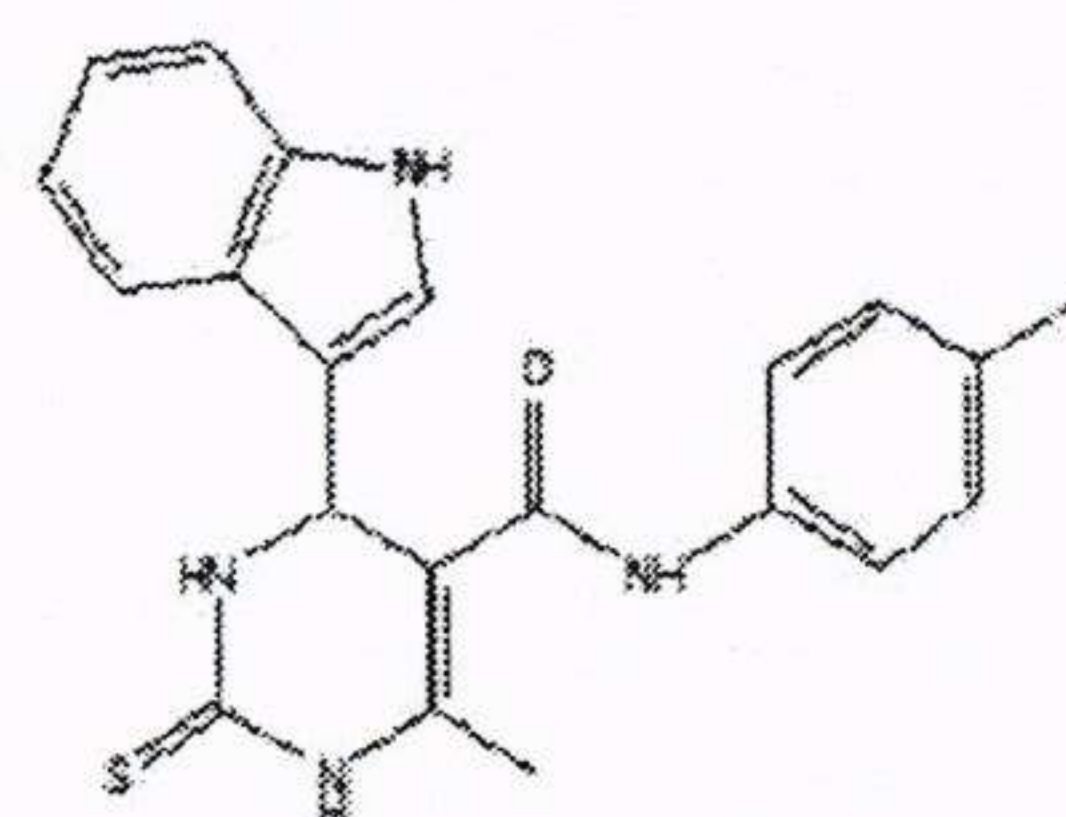

8a

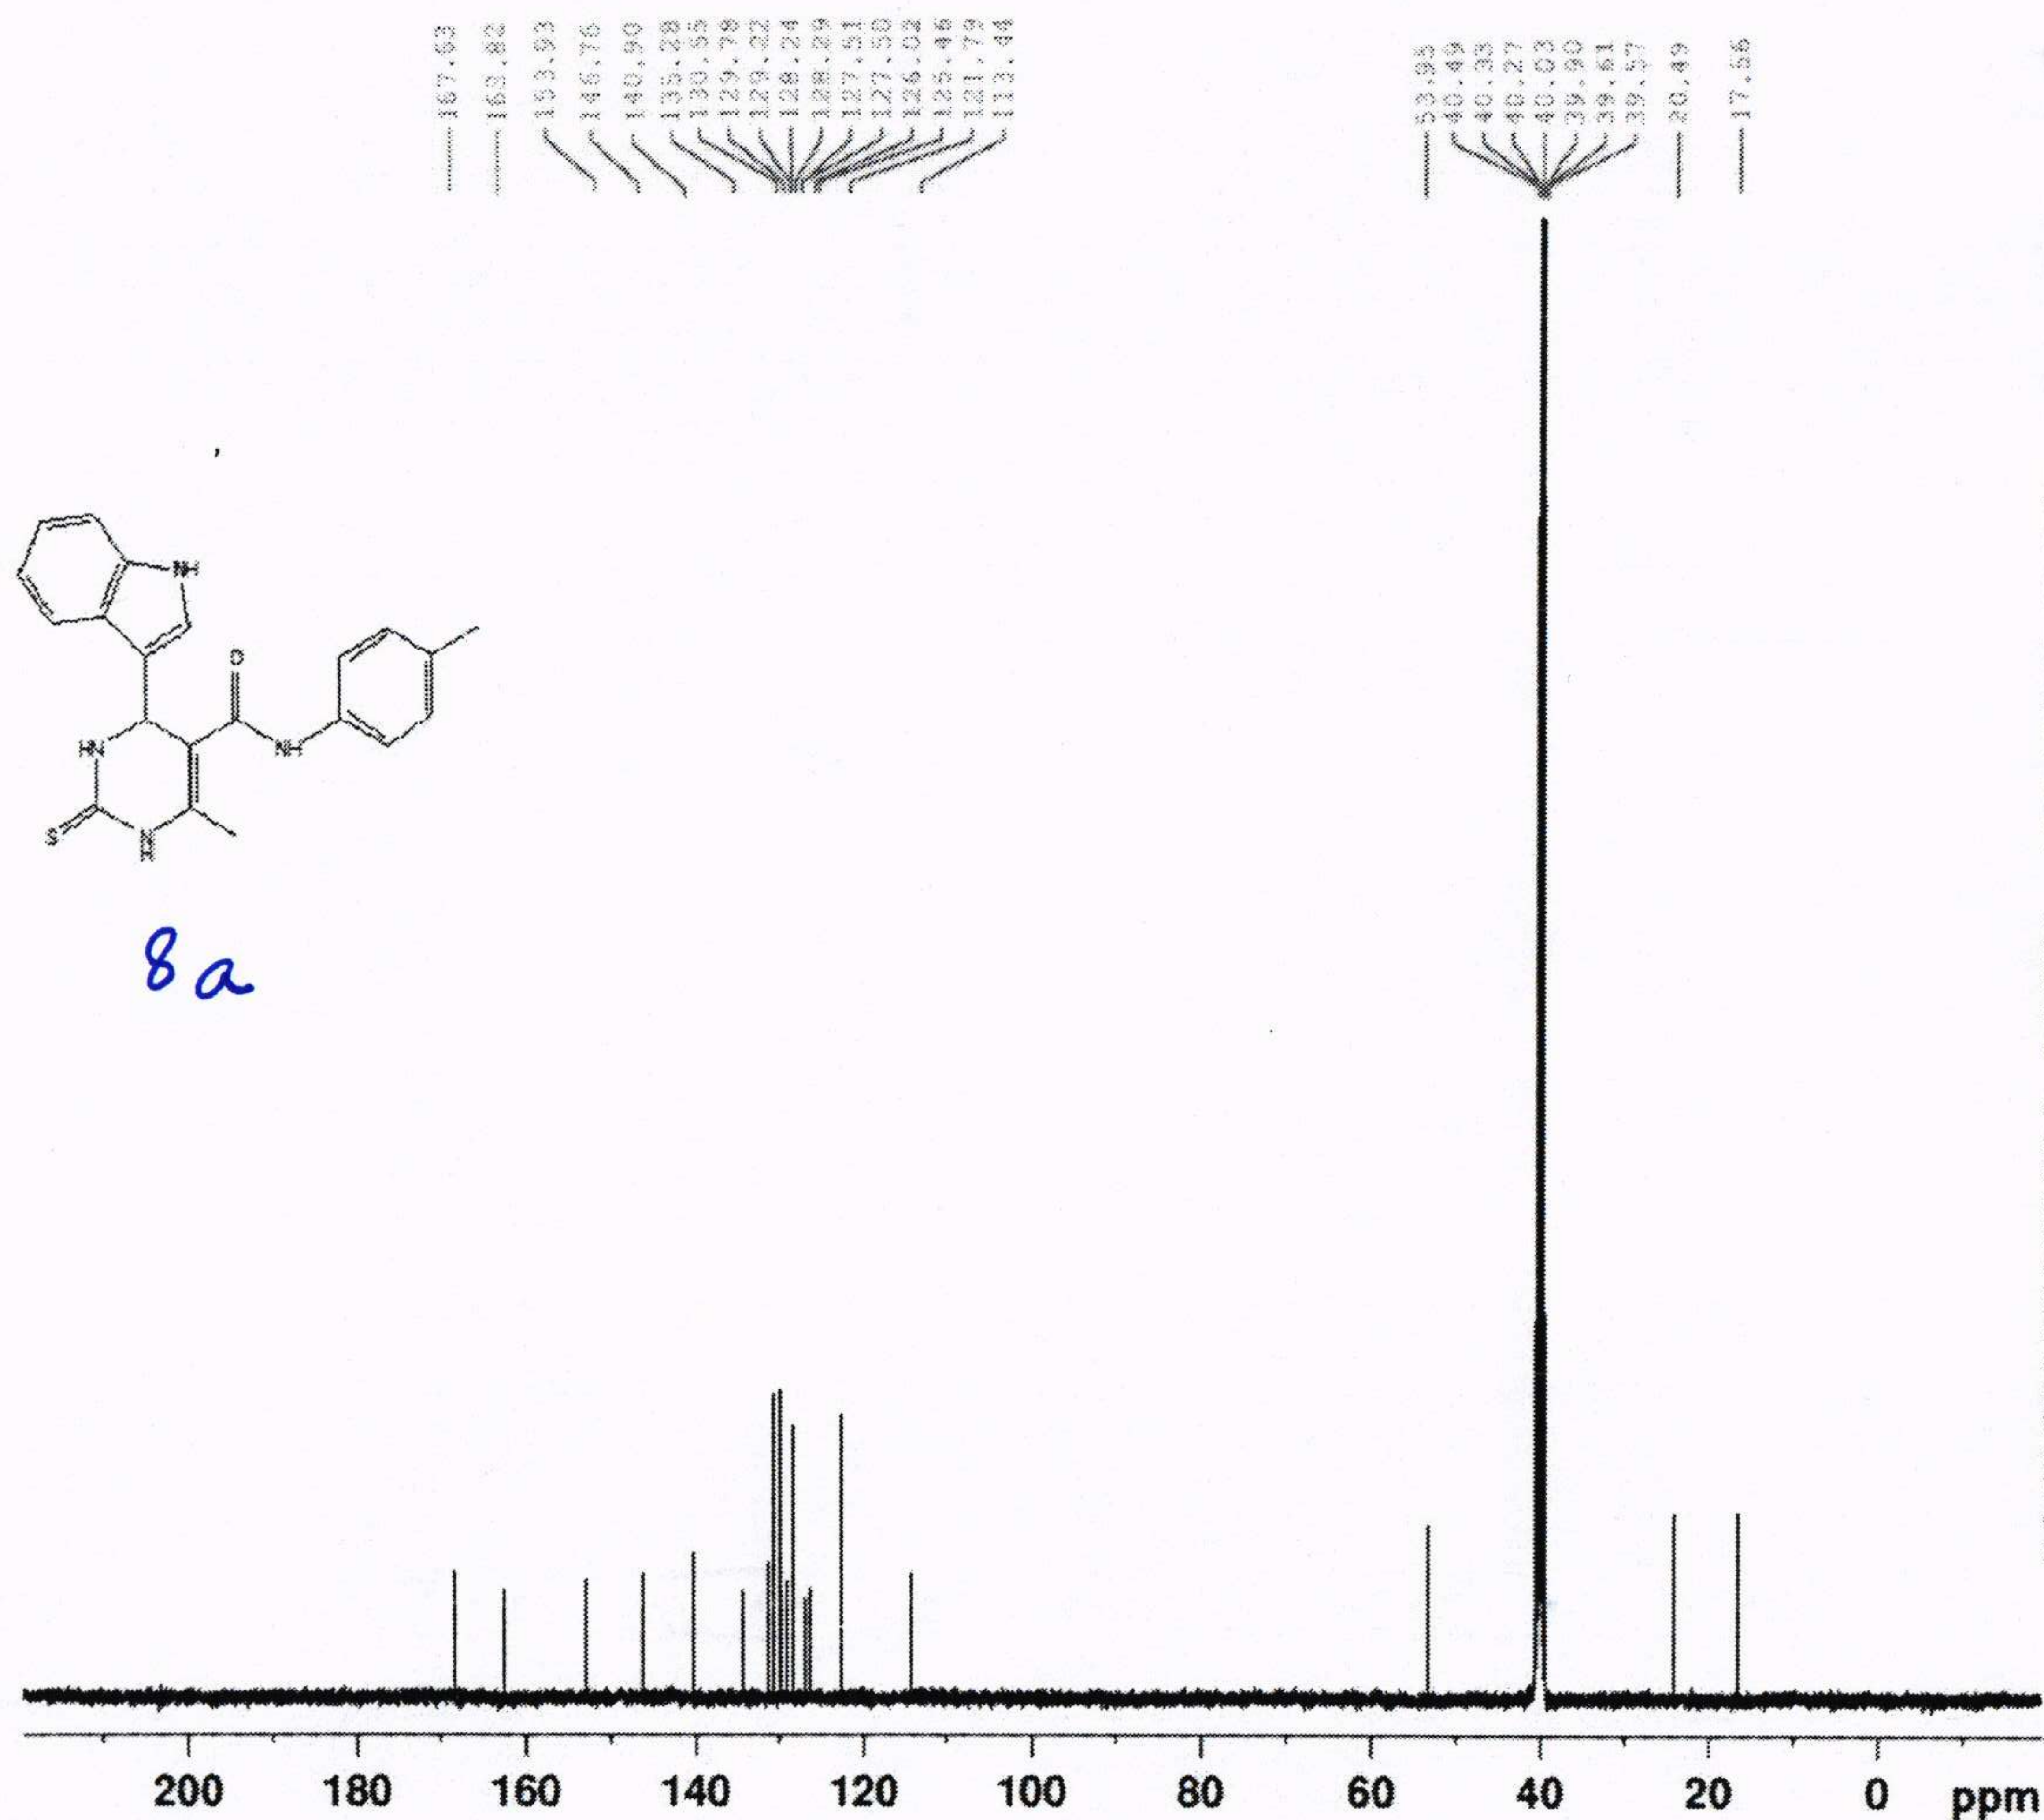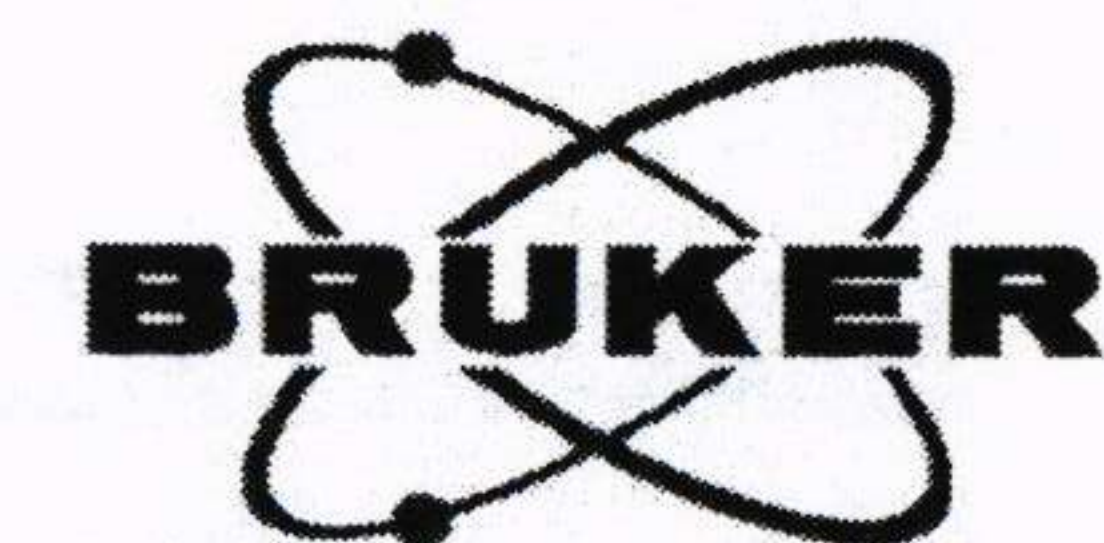

NAME drshahat-14  
 EXPNO 11  
 PROCNO 1  
 Date\_ 20210624  
 Time 20.47  
 INSTRUM spect  
 PROBHD 5 mm PABBO BB-  
 PULPROG zgpg30  
 TD 65536  
 SOLVENT DMSO  
 NS 2000  
 DS 2  
 SWH 30030.029 Hz  
 FIDRES 0.458222 Hz  
 AQ 1.0912410 sec  
 RG 14596.5  
 DW 16.650 usec  
 DE 6.50 usec  
 TE 299.1 K  
 D1 2.00000000 sec  
 D11 0.03000000 sec  
 TD0 1

===== CHANNEL f1 =====  
 NUC1 13C  
 P1 20.00 usec  
 PL1 -6.00 dB  
 SFO1 125.7703643 MHz

===== CHANNEL f2 =====  
 CPDPRG2 waltz16  
 NUC2 1H  
 PCPD2 80.00 usec  
 PL2 -1.10 dB  
 PL12 13.44 dB  
 PL13 16.40 dB  
 SFO2 500.1320005 MHz  
 SI 32768  
 SF 125.7577890 MHz  
 WDW EM  
 SSB 0  
 LB 1.00 Hz  
 GB 0  
 PC 1.40

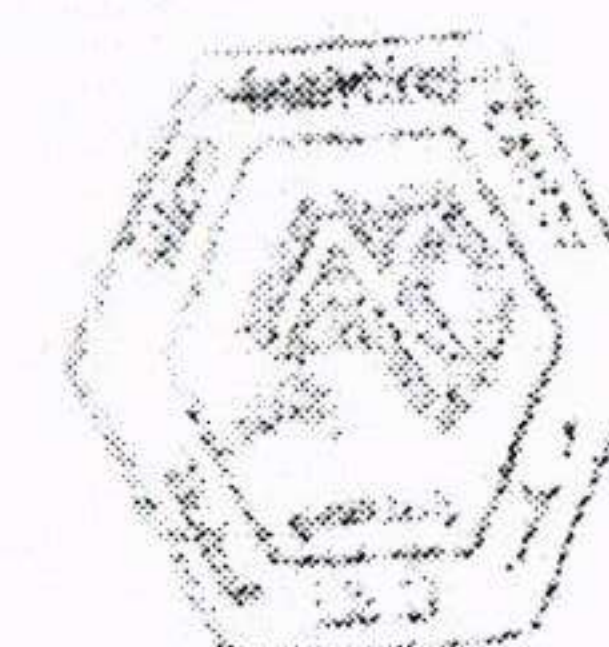



4-(2-Chloroquinolin-3-yl)-6-methyl-2-thioxo-N-p-tolyl-1,2,3,4-tetrahydropyrimidine-5-carboxamide

86

DN DMSO D:\ abar

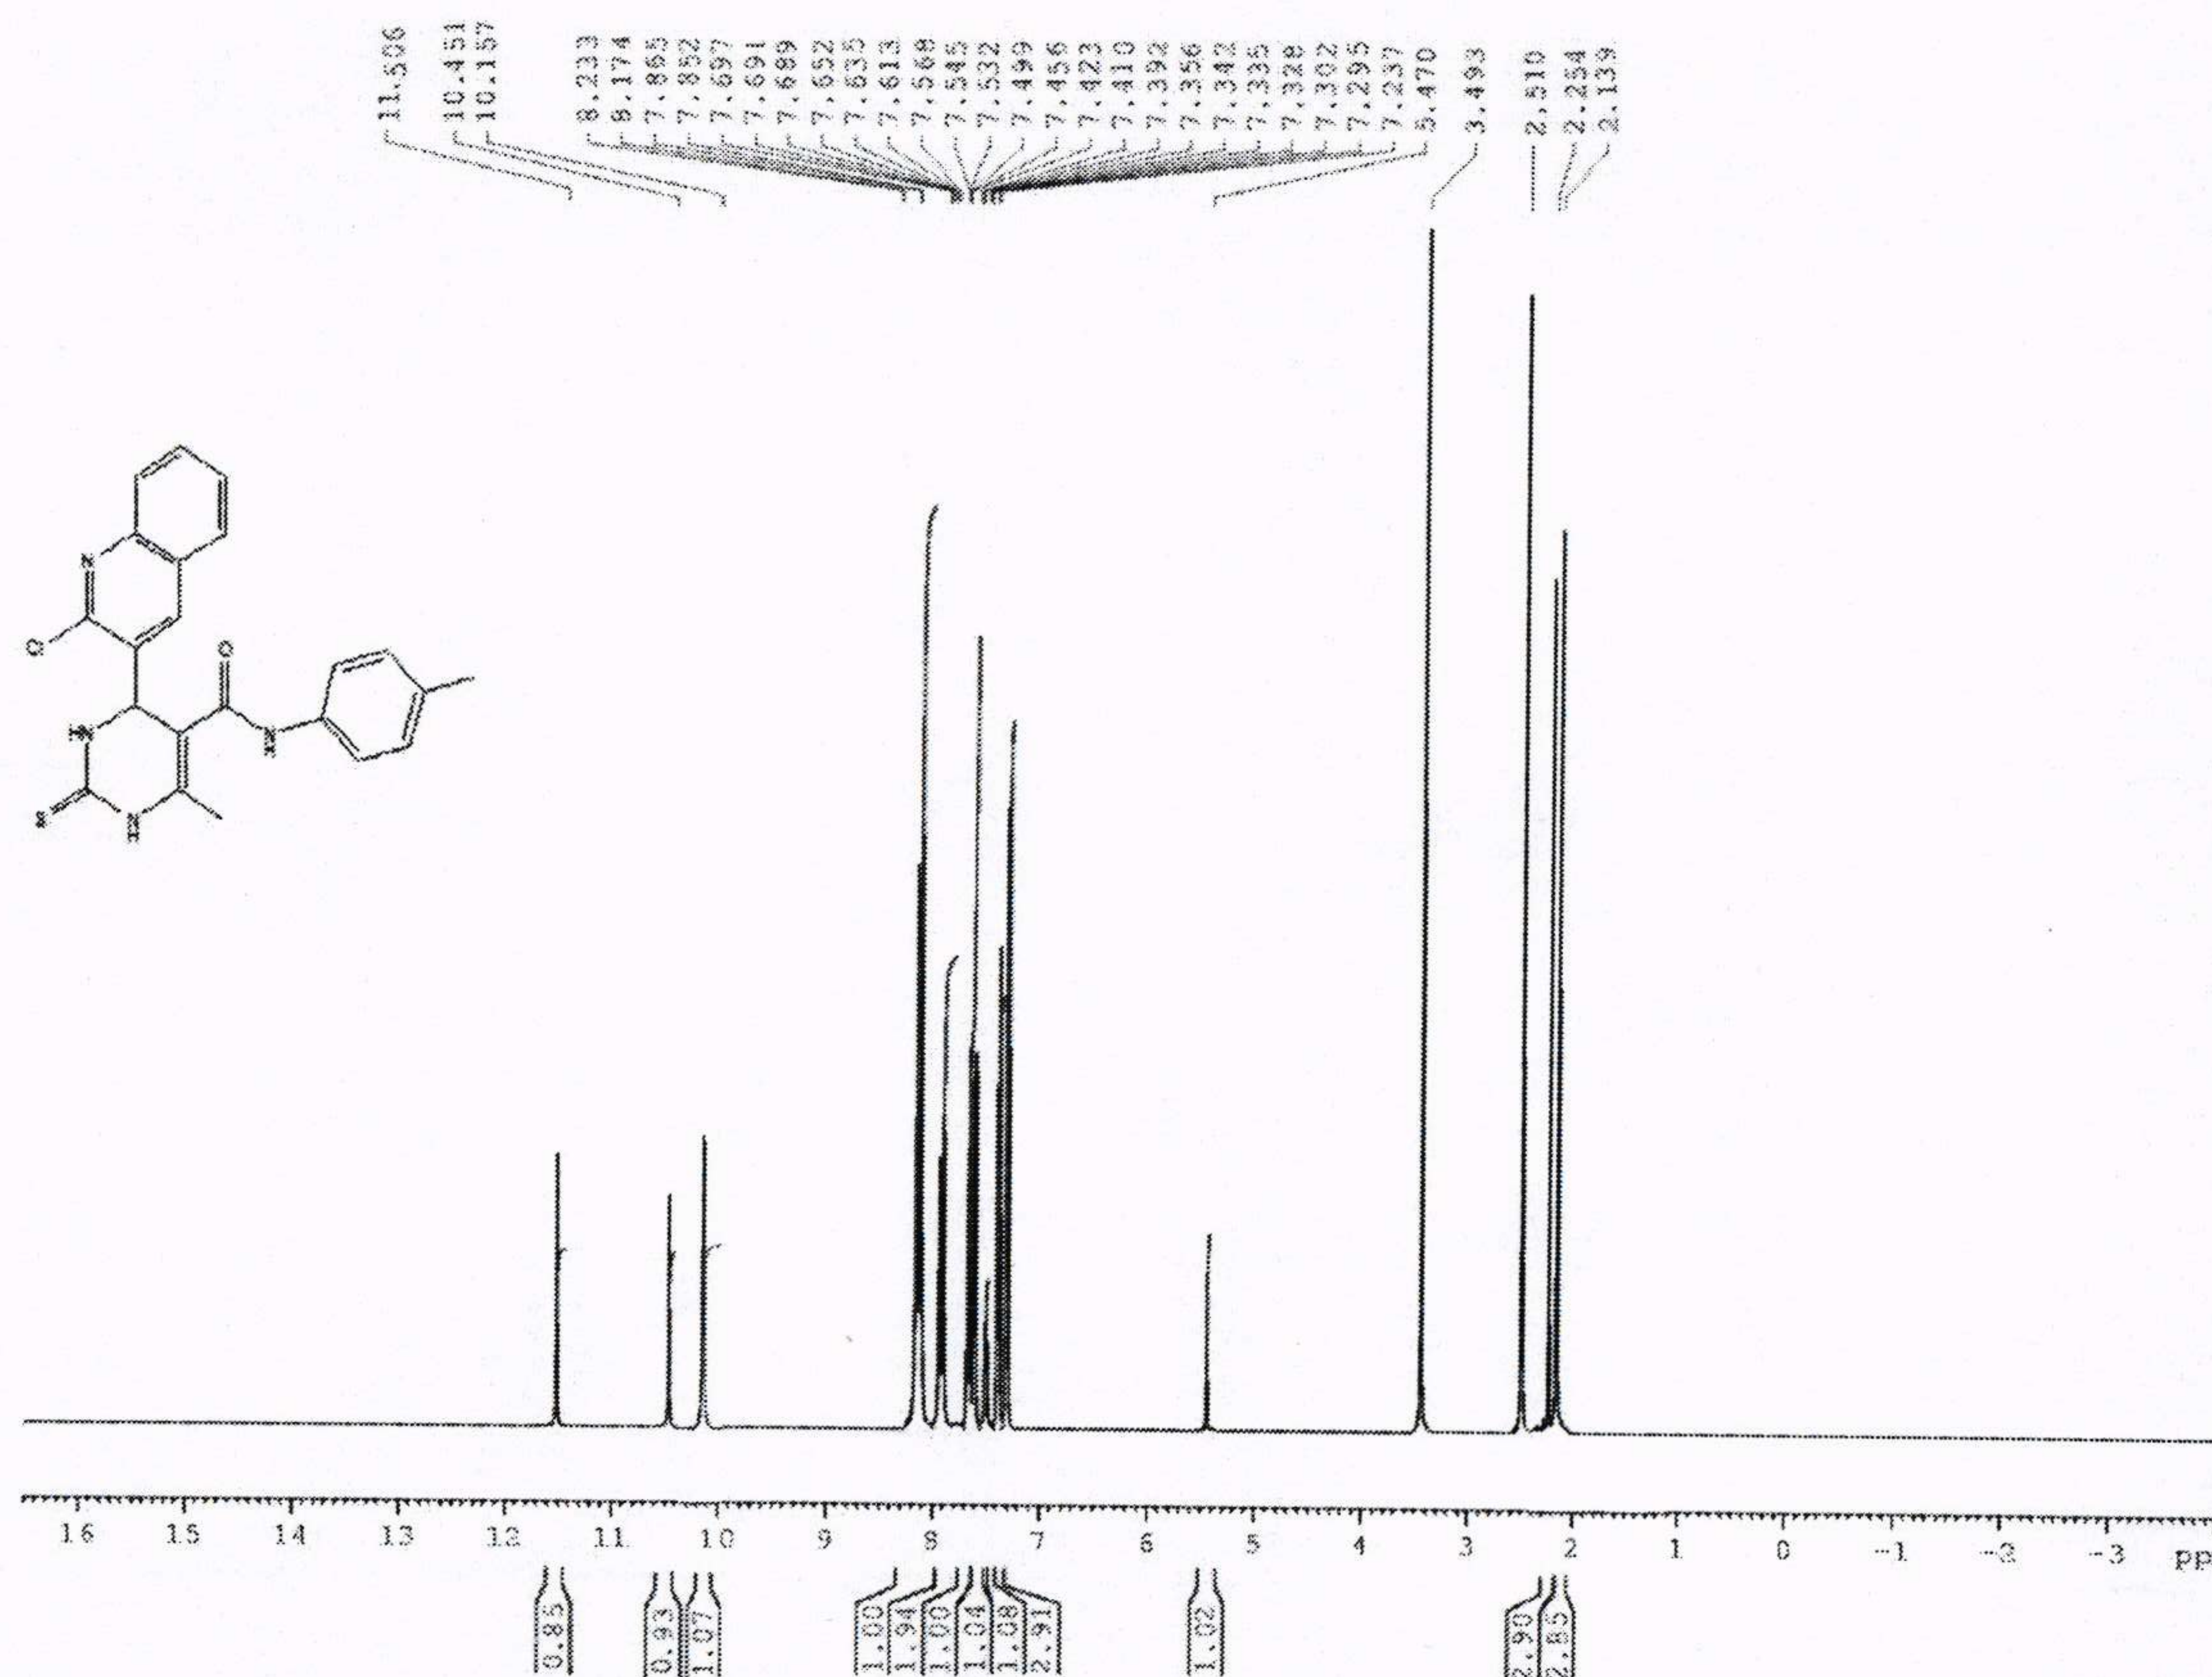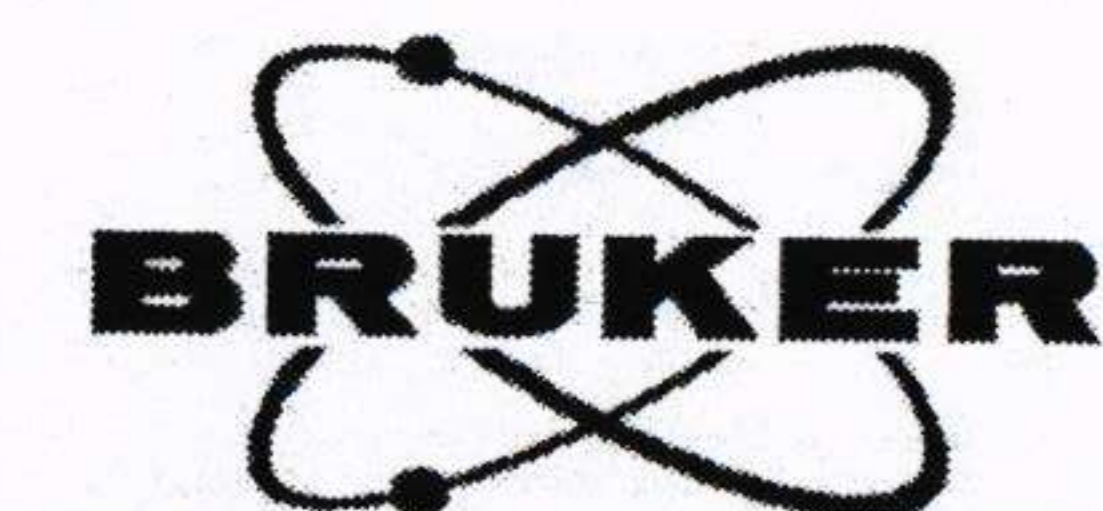

NAME dirshahat-13  
 EXPNO 10  
 PROCNO 1  
 Date\_ 20210623  
 Time 18.59  
 INSTRUM spect  
 PROBHD 5 mm PABBO BB-  
 PULPROG zg30  
 TD 65536  
 SOLVENT DMSO  
 NS 16  
 DS 2  
 SWH 10330.578 Hz  
 FIDRES 0.157632 Hz  
 AQ 3.1720407 sec  
 RG 90.5  
 DW 48.400 usec  
 DE 6.50 usec  
 TE 298.3 K  
 D1 1.00000000 sec  
 ID0 1

===== CHANNEL f1 =====  
 NUC1 1H  
 P1 14.70 usec  
 PL1 -1.10 dB  
 SFO1 500.1330885 MHz  
 SI 32768  
 SF 500.1300000 MHz  
 WDW EM  
 SSB 0  
 LB 0.30 Hz  
 GB 0  
 PC 1.00

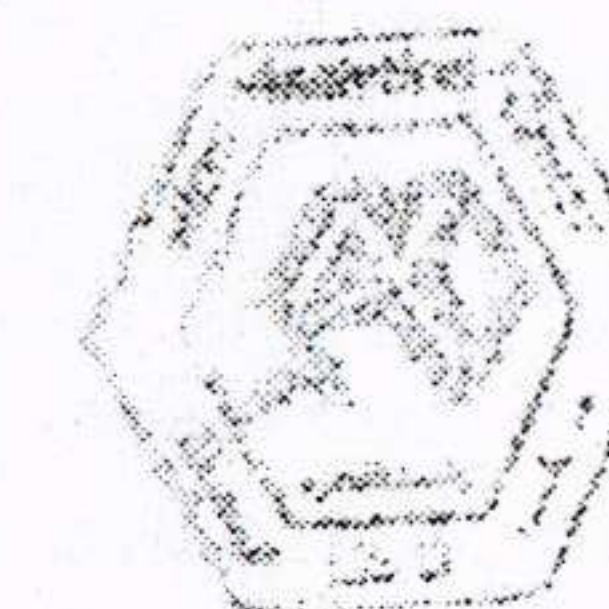



C13CPD32 DMSO D:\\ abari 46

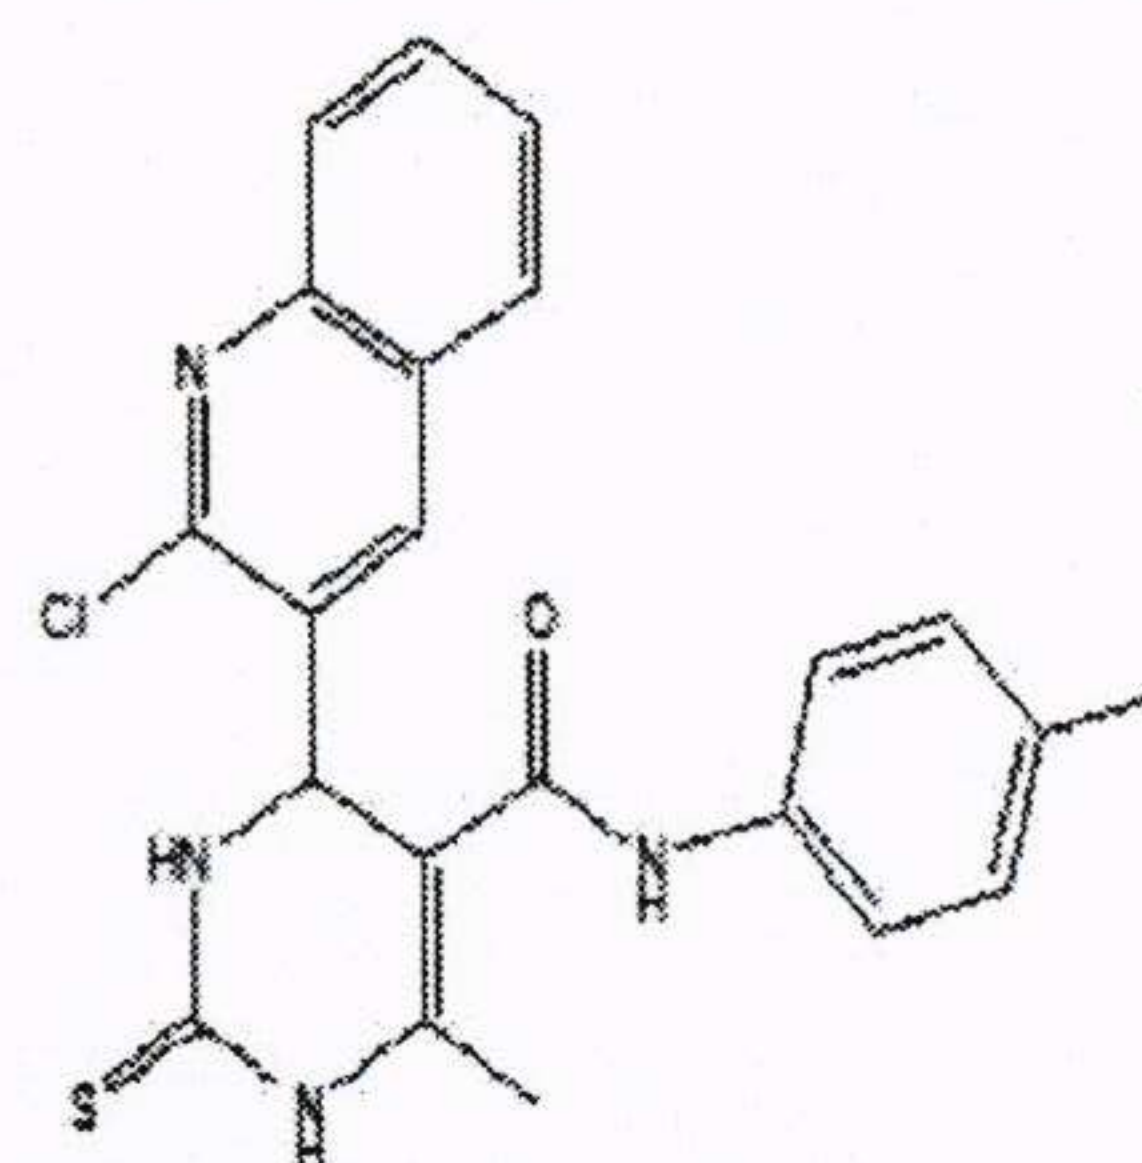

8b

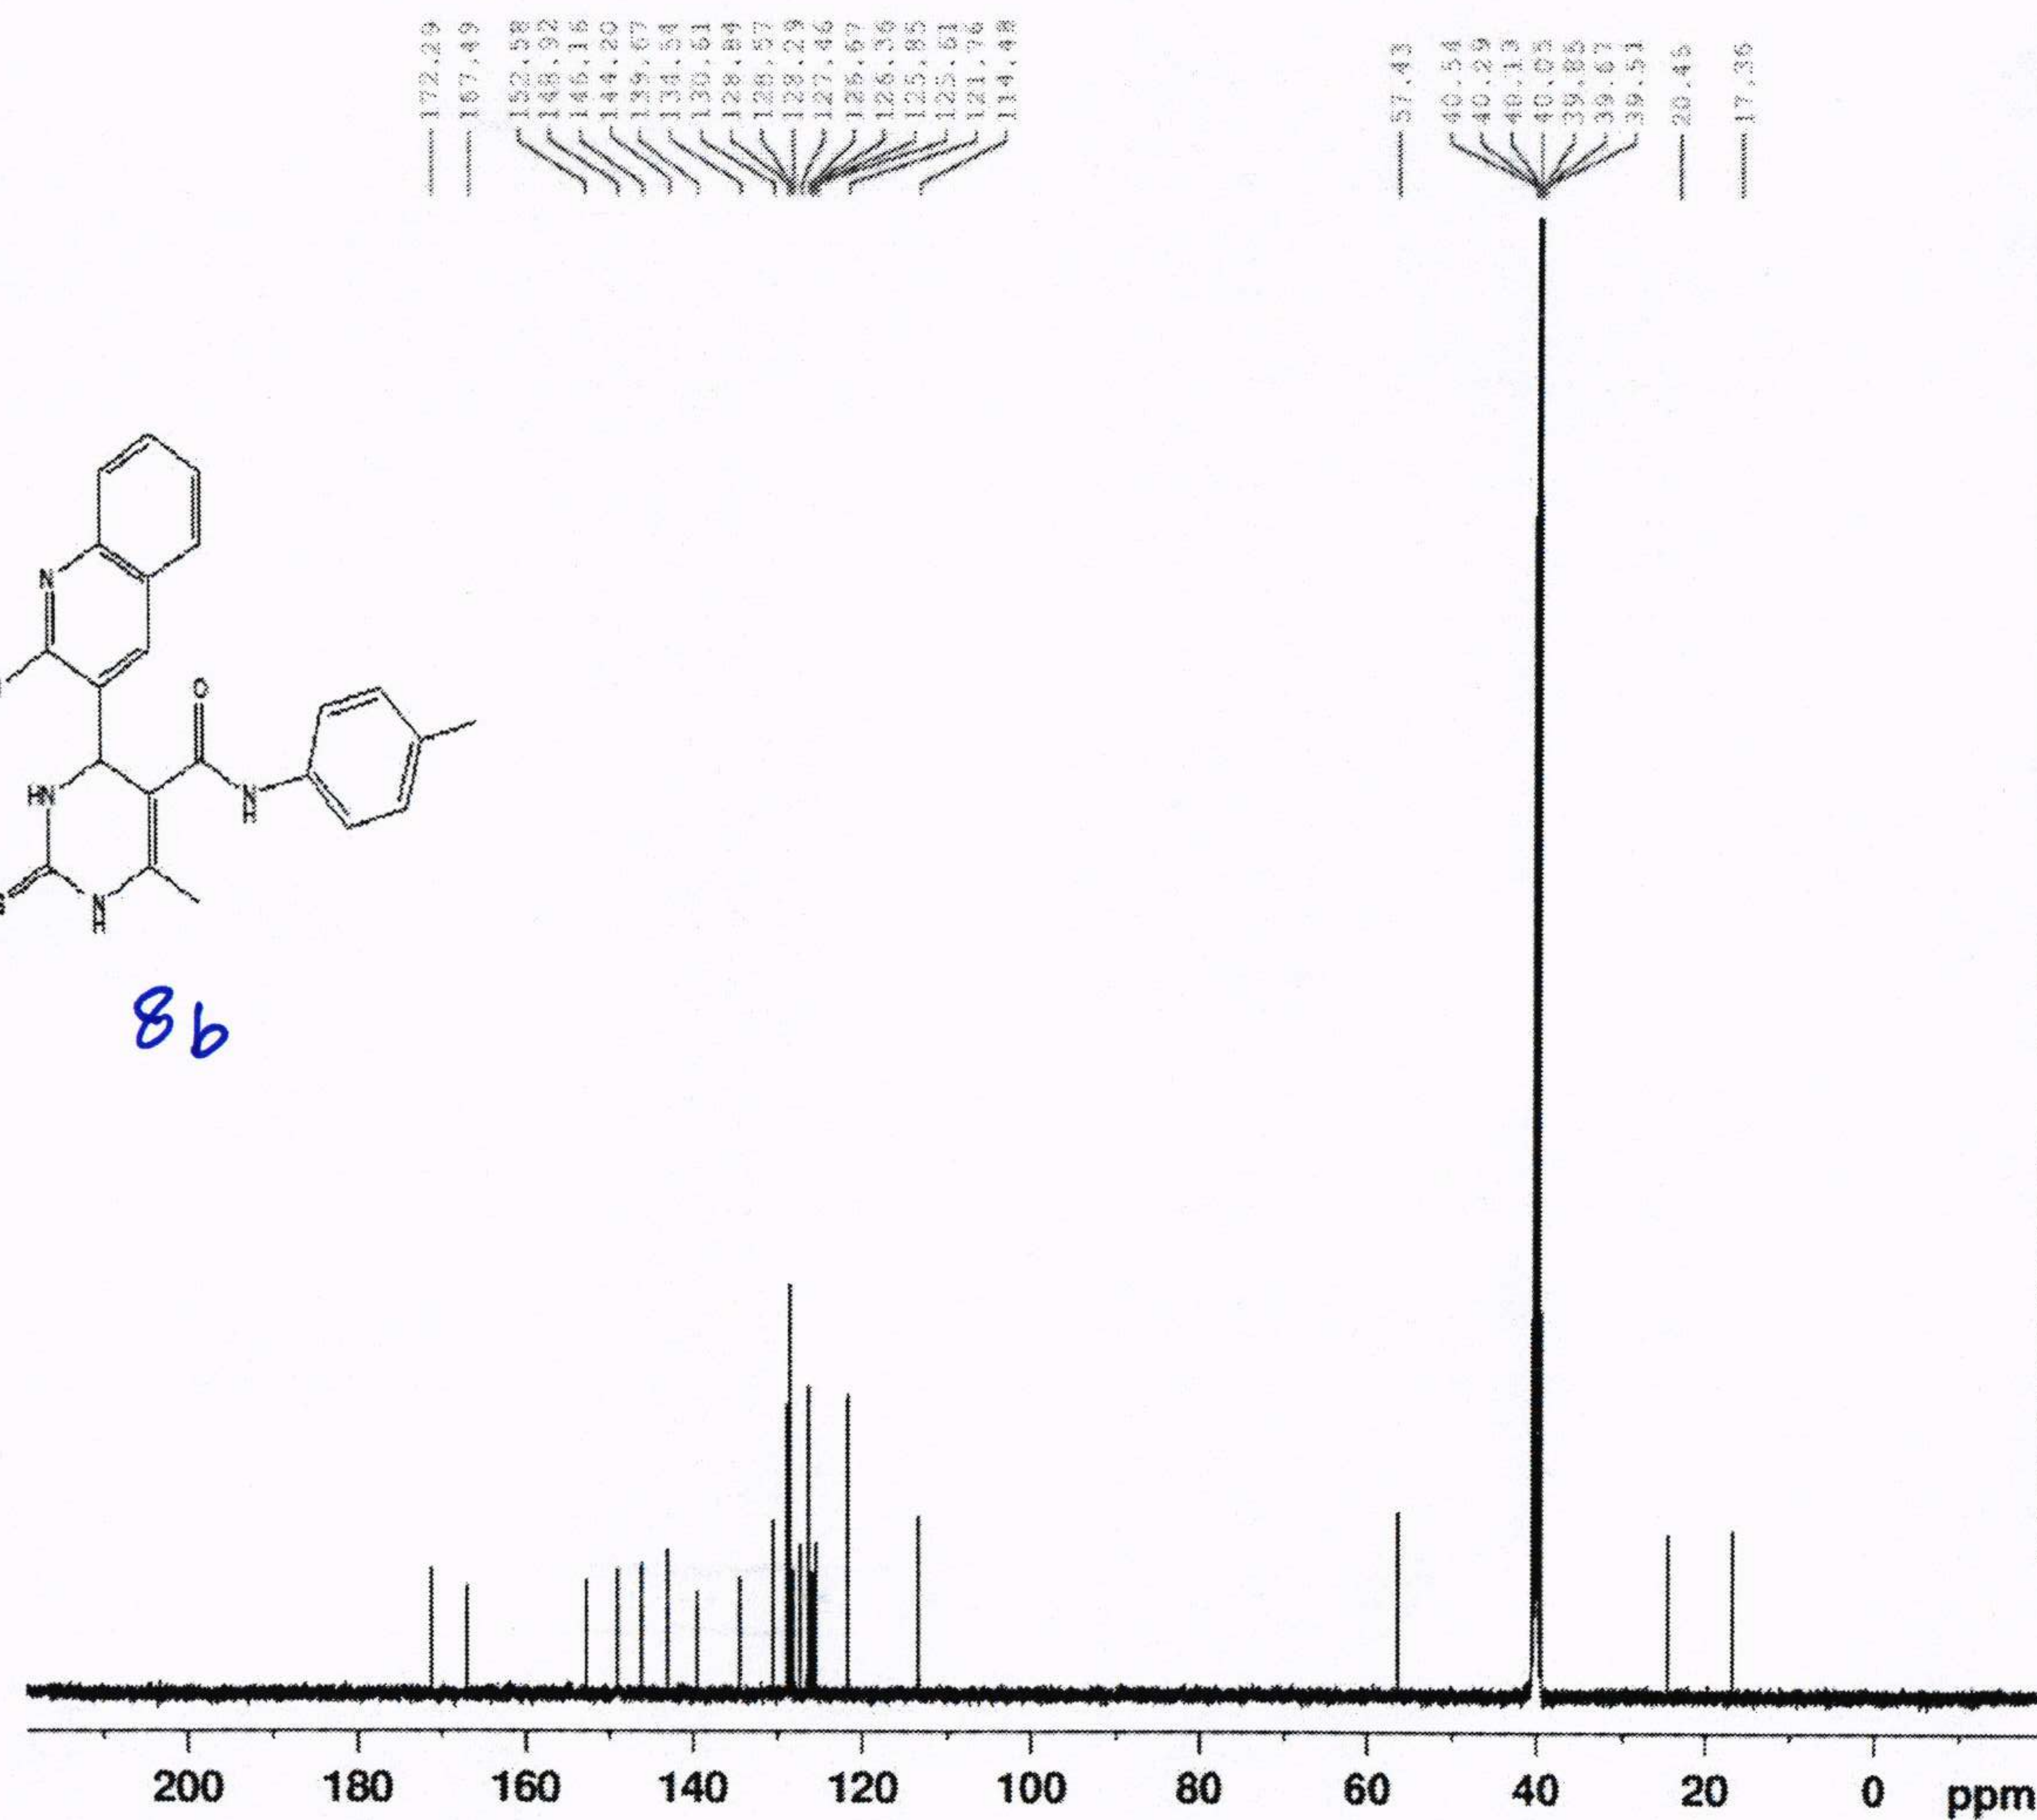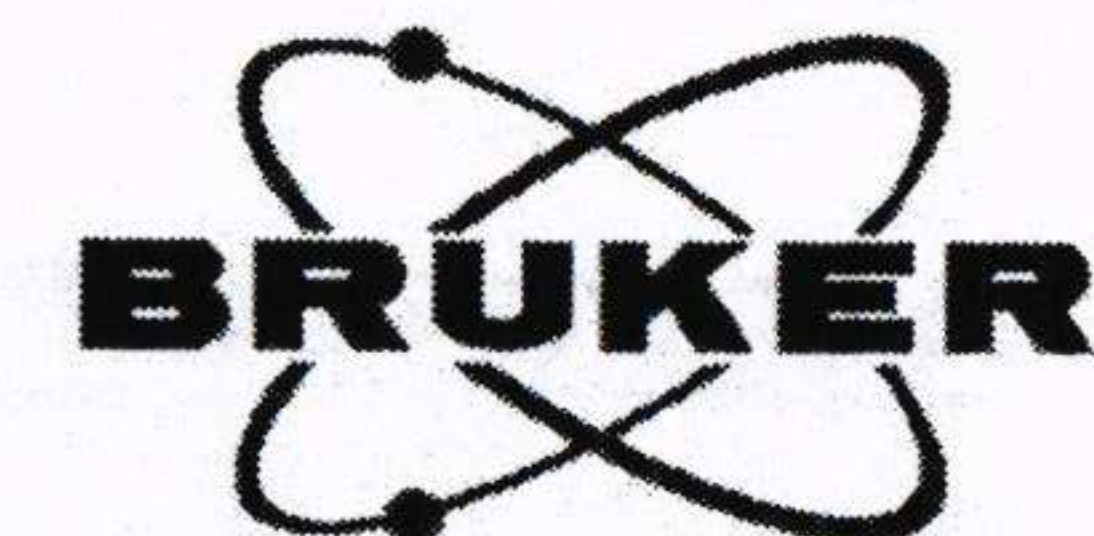

NAME drshahat-13  
 EXPNO 11  
 PROCNO 1  
 Date\_ 20210623  
 Time 20.47  
 INSTRUM spect  
 PROBHD 5 mm PABBO BB-  
 PULPROG zgpg30  
 TD 65536  
 SOLVENT DMSO  
 NS 2000  
 DS 2  
 SWH 30030.029 Hz  
 FIDRES 0.458222 Hz  
 AQ 1.0912410 sec  
 RG 14596.5  
 DW 16.650 usec  
 DE 6.50 usec  
 TE 299.1 K  
 D1 2.00000000 sec  
 D11 0.03000000 sec  
 TD0 1

===== CHANNEL f1 =====  
 NUC1 13C  
 P1 20.00 usec  
 PL1 -6.00 dB  
 SFO1 125.7703643 MHz

===== CHANNEL f2 =====  
 CPDPRG2 waltz16  
 NUC2 1H  
 PCPD2 80.00 usec  
 PL2 -1.10 dB  
 PL12 13.44 dB  
 PL13 16.40 dB  
 SFO2 500.1320005 MHz  
 SI 32768  
 SF 125.7577890 MHz  
 WDW EM  
 SSB 0  
 LB 1.00 Hz  
 GB 0  
 PC 1.40

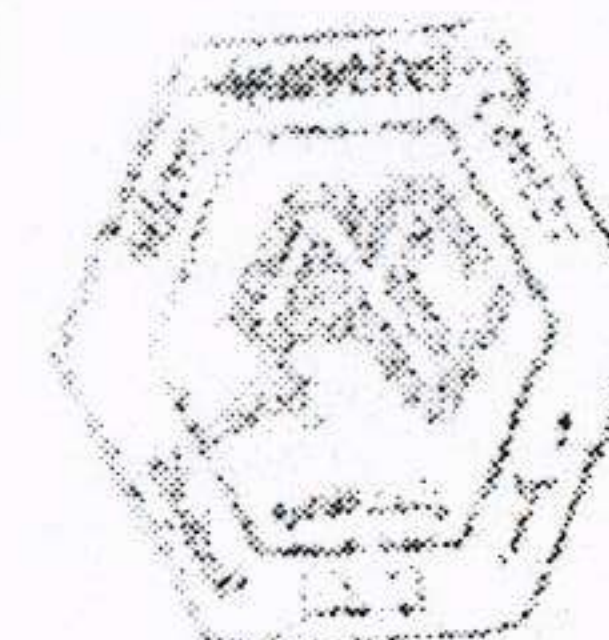



4-(1,3-Diphenyl-1H-pyrazol-4-yl)-6-methyl-2-thioxo-N-p-tolyl-1,2,3,4-tetrahydropyrimidine-5-carboxamide

8c

DN DMSO D:\ abar

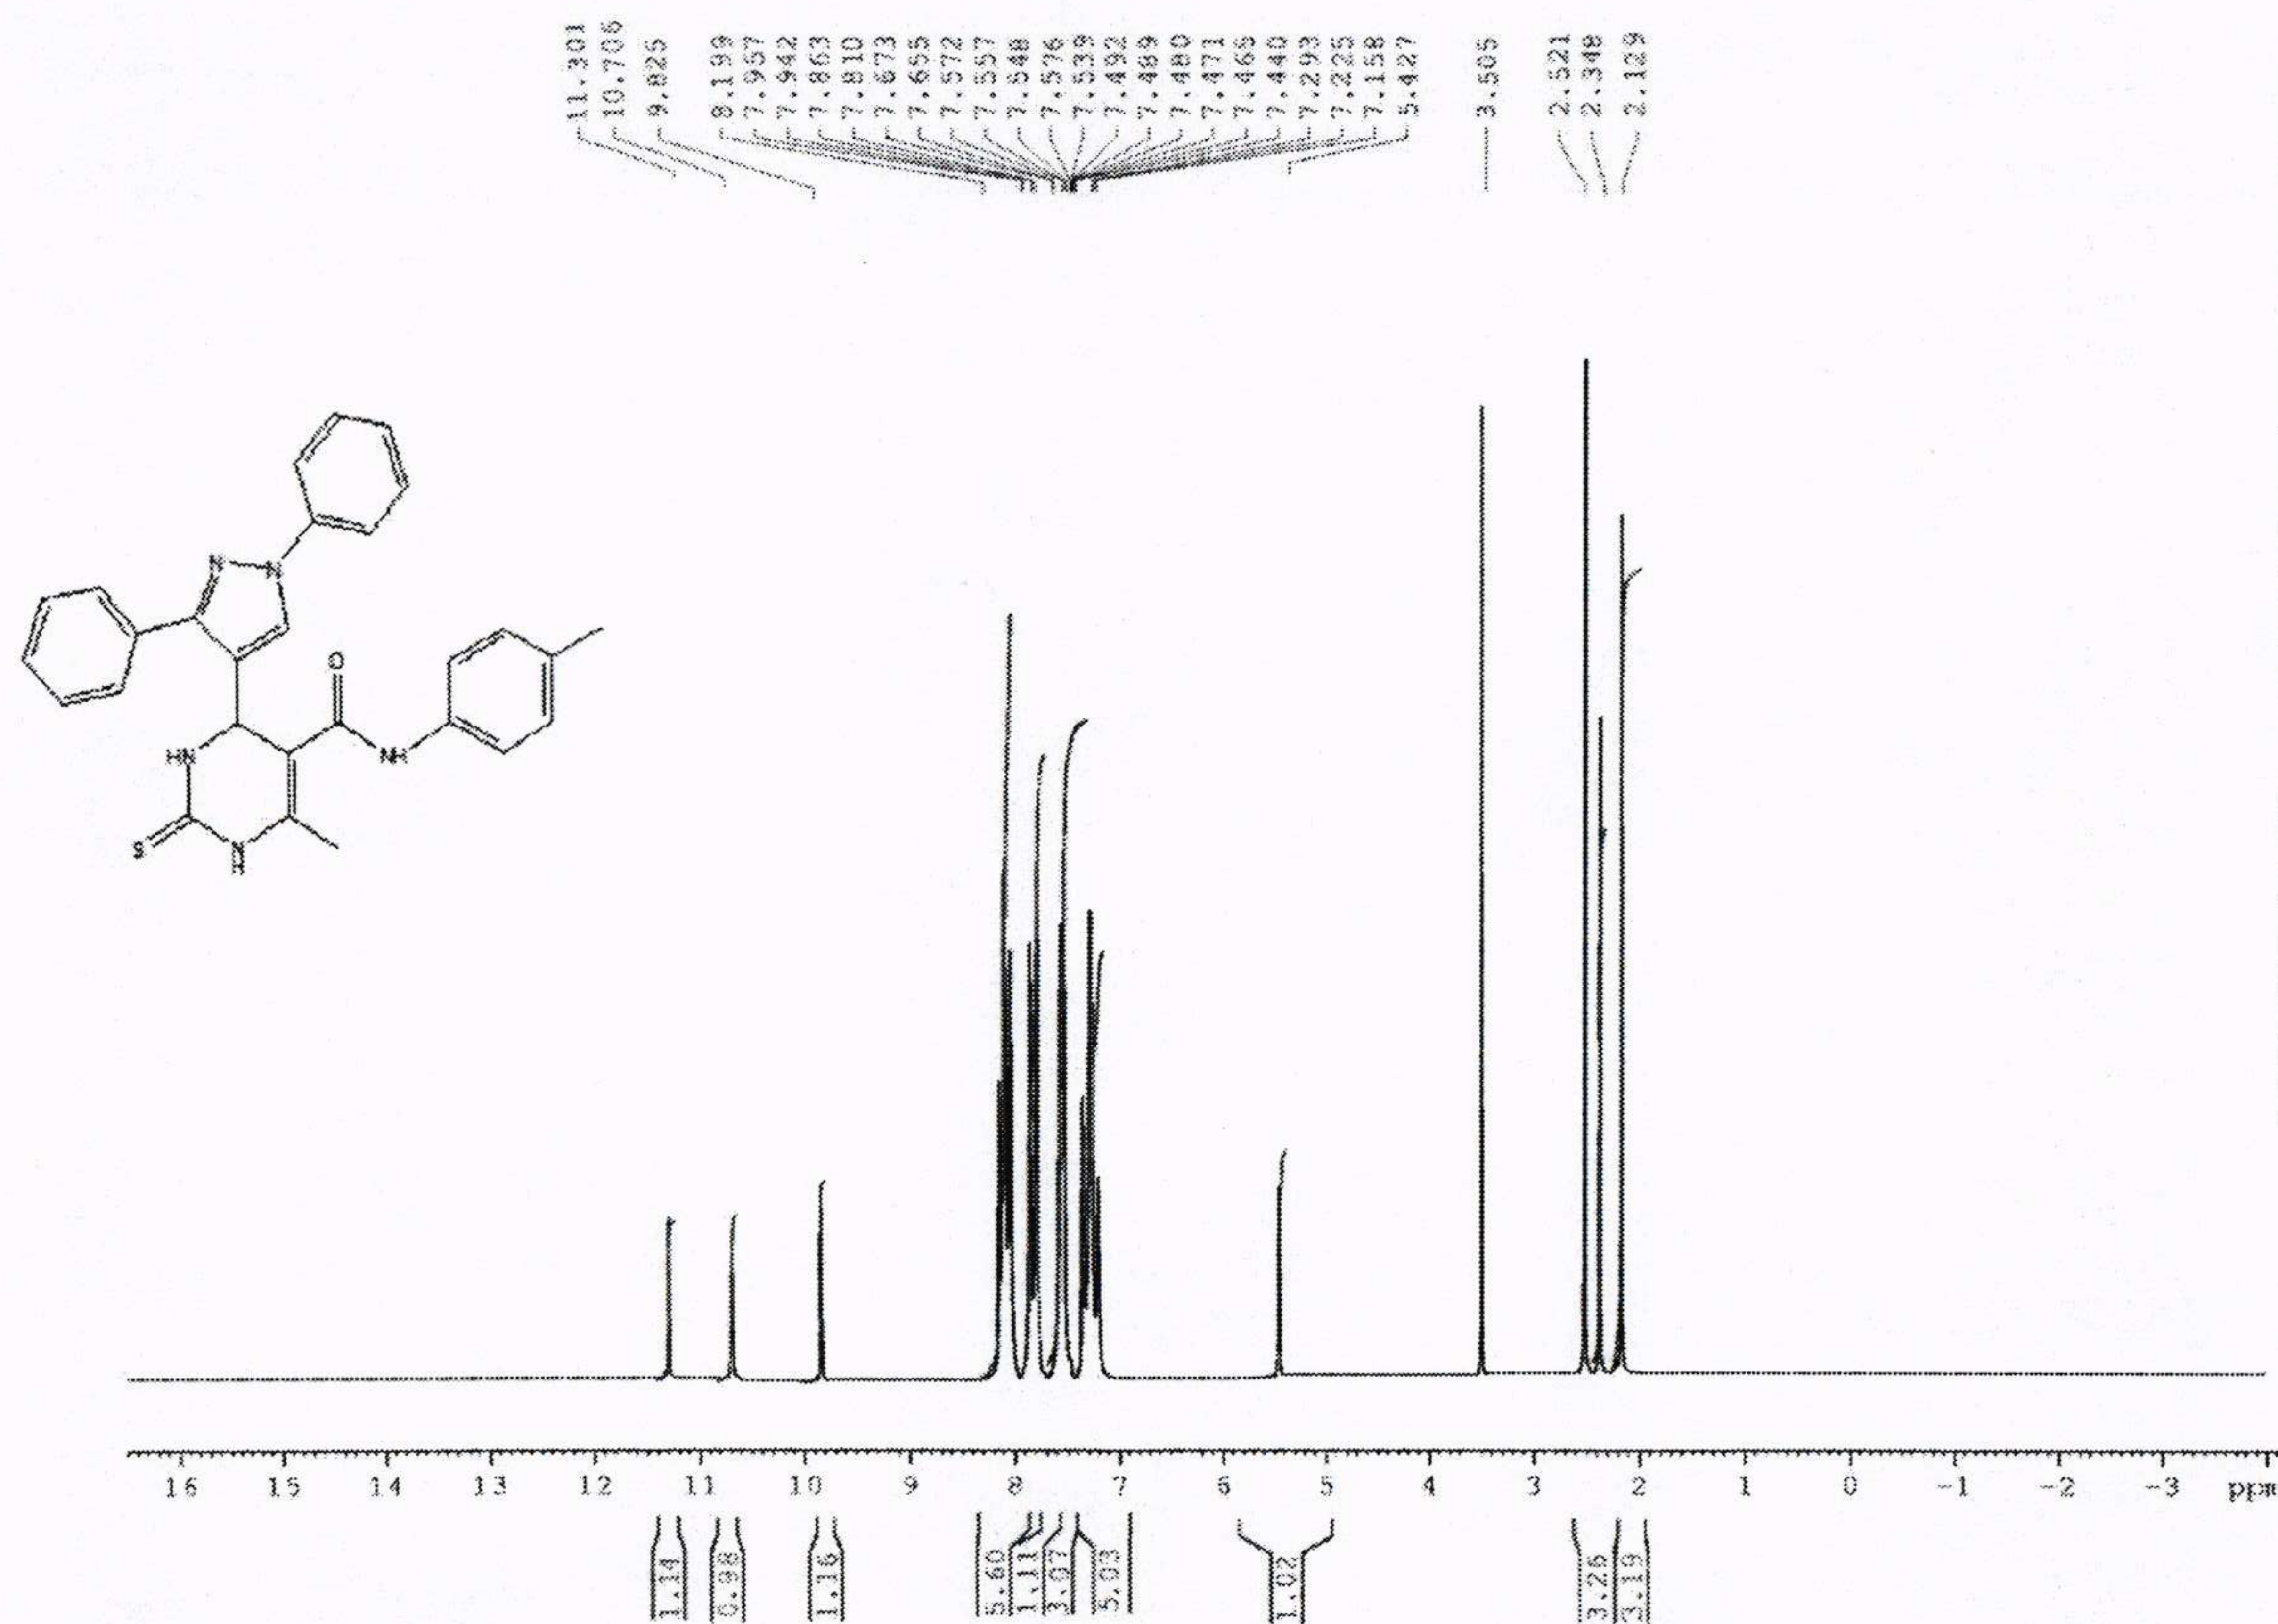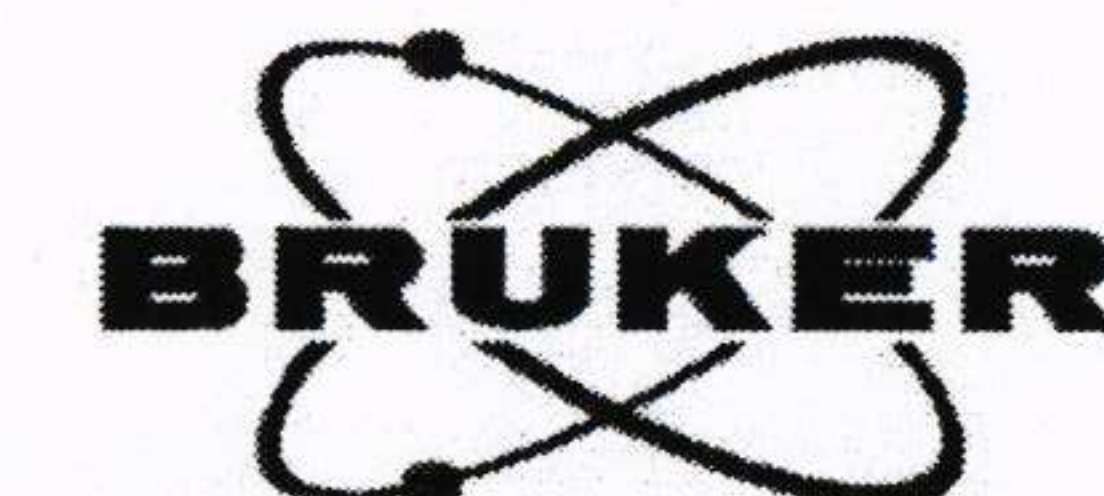

NAME drshahat-15  
 EXPNO 10  
 PROCNO 1  
 Date\_ 20210622  
 Time 11.17  
 INSTRUM spect  
 PROBHD 5 mm PABBO BB-  
 PULPROG zg30  
 TD 65536  
 SOLVENT DMSO  
 NS 16  
 DS 2  
 SWH 10330.578 Hz  
 FIDRES 0.157632 Hz  
 AQ 3.1720407 sec  
 RG 128  
 DW 48.400 usec  
 DE 6.50 usec  
 TE 298.3 K  
 D1 1.00000000 sec  
 TDO 1

===== CHANNEL f1 =====  
 NUC1 1H  
 P1 14.70 usec  
 PL1 -1.10 dB  
 SFO1 500.1330885 MHz  
 SI 32768  
 SF 500.1300000 MHz  
 WDW EM  
 SSB 0  
 LB 0.30 Hz  
 GB 0  
 PC 1.00

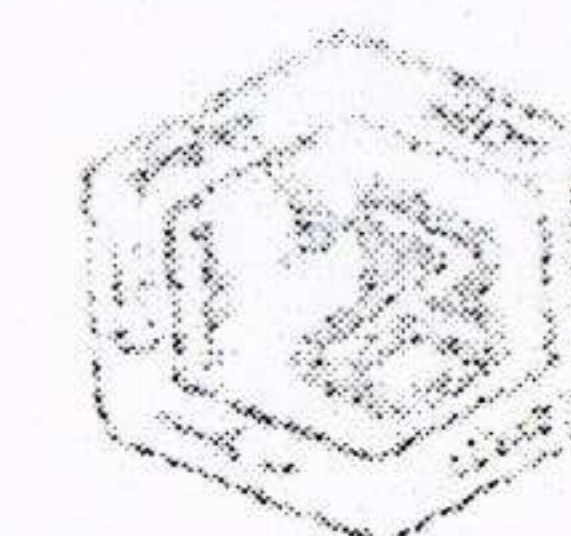



C13CPD32 DMSO D:\\ abari 44

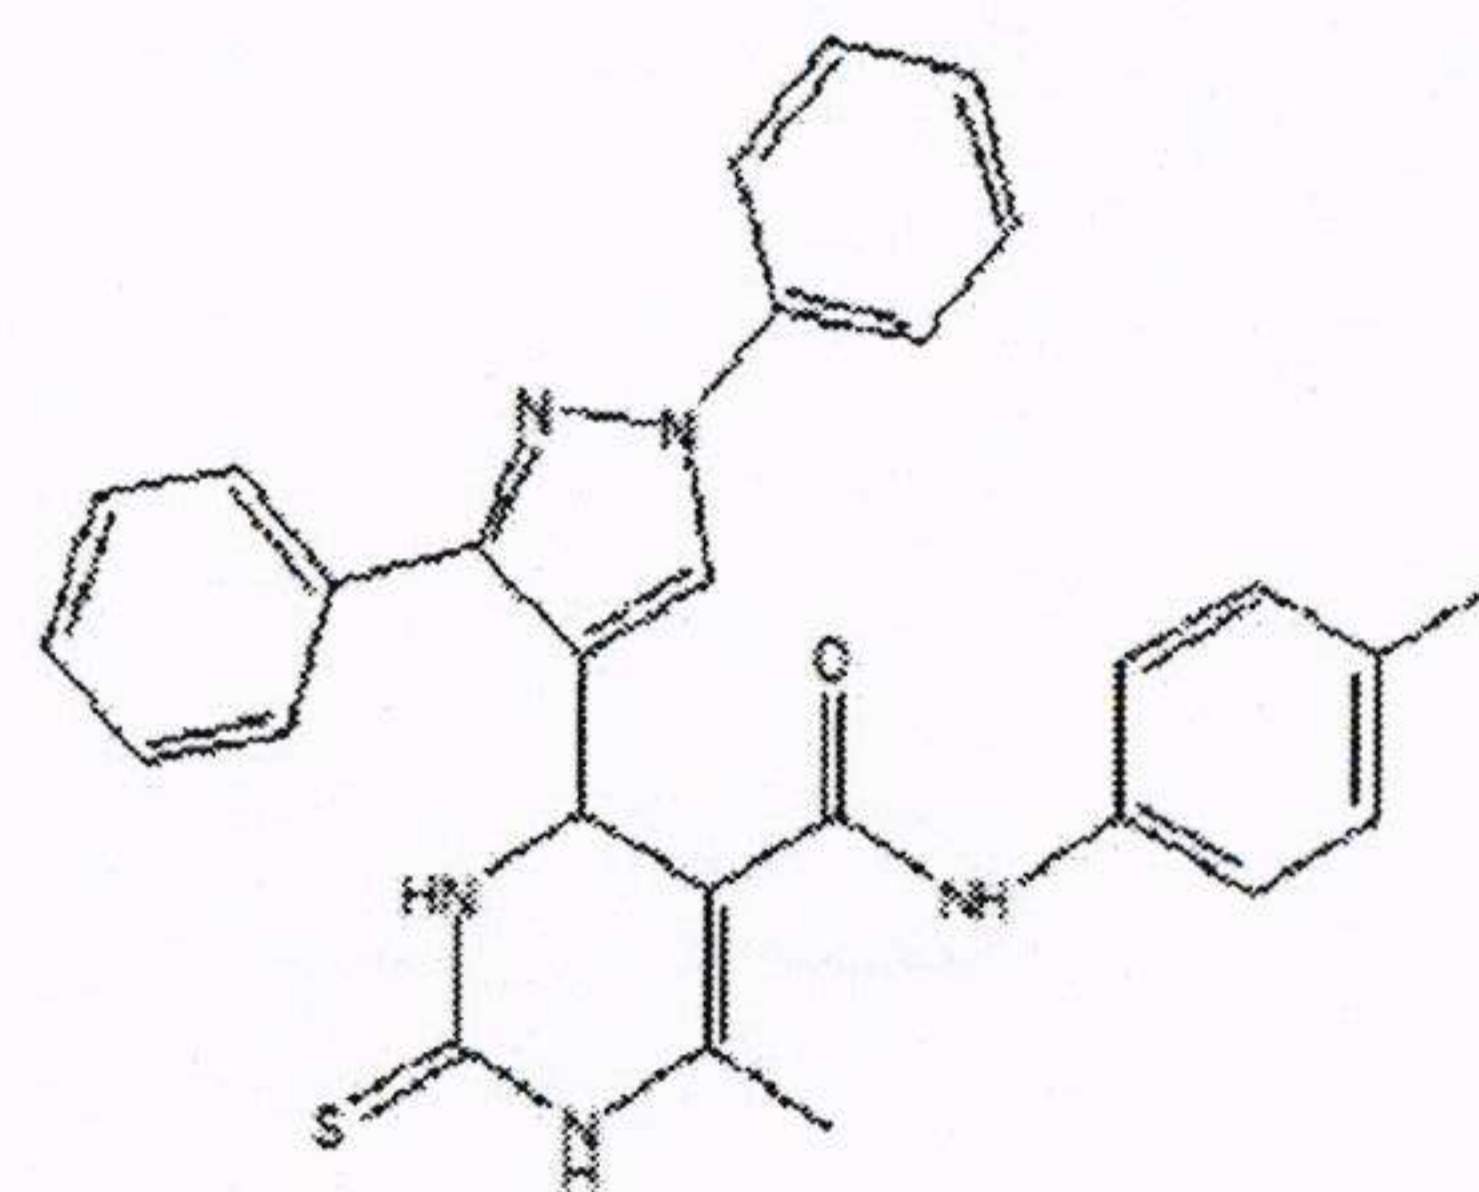

178.69  
174.12  
168.11  
159.90  
155.16  
151.07  
143.67  
142.06  
141.17  
139.67  
138.53  
138.51  
128.82  
128.58  
128.35  
127.47  
126.23  
126.18  
125.94  
125.52  
121.77  
113.15

57.87  
40.48  
40.43  
40.18  
40.01  
39.83  
39.35  
39.25  
23.55  
17.96

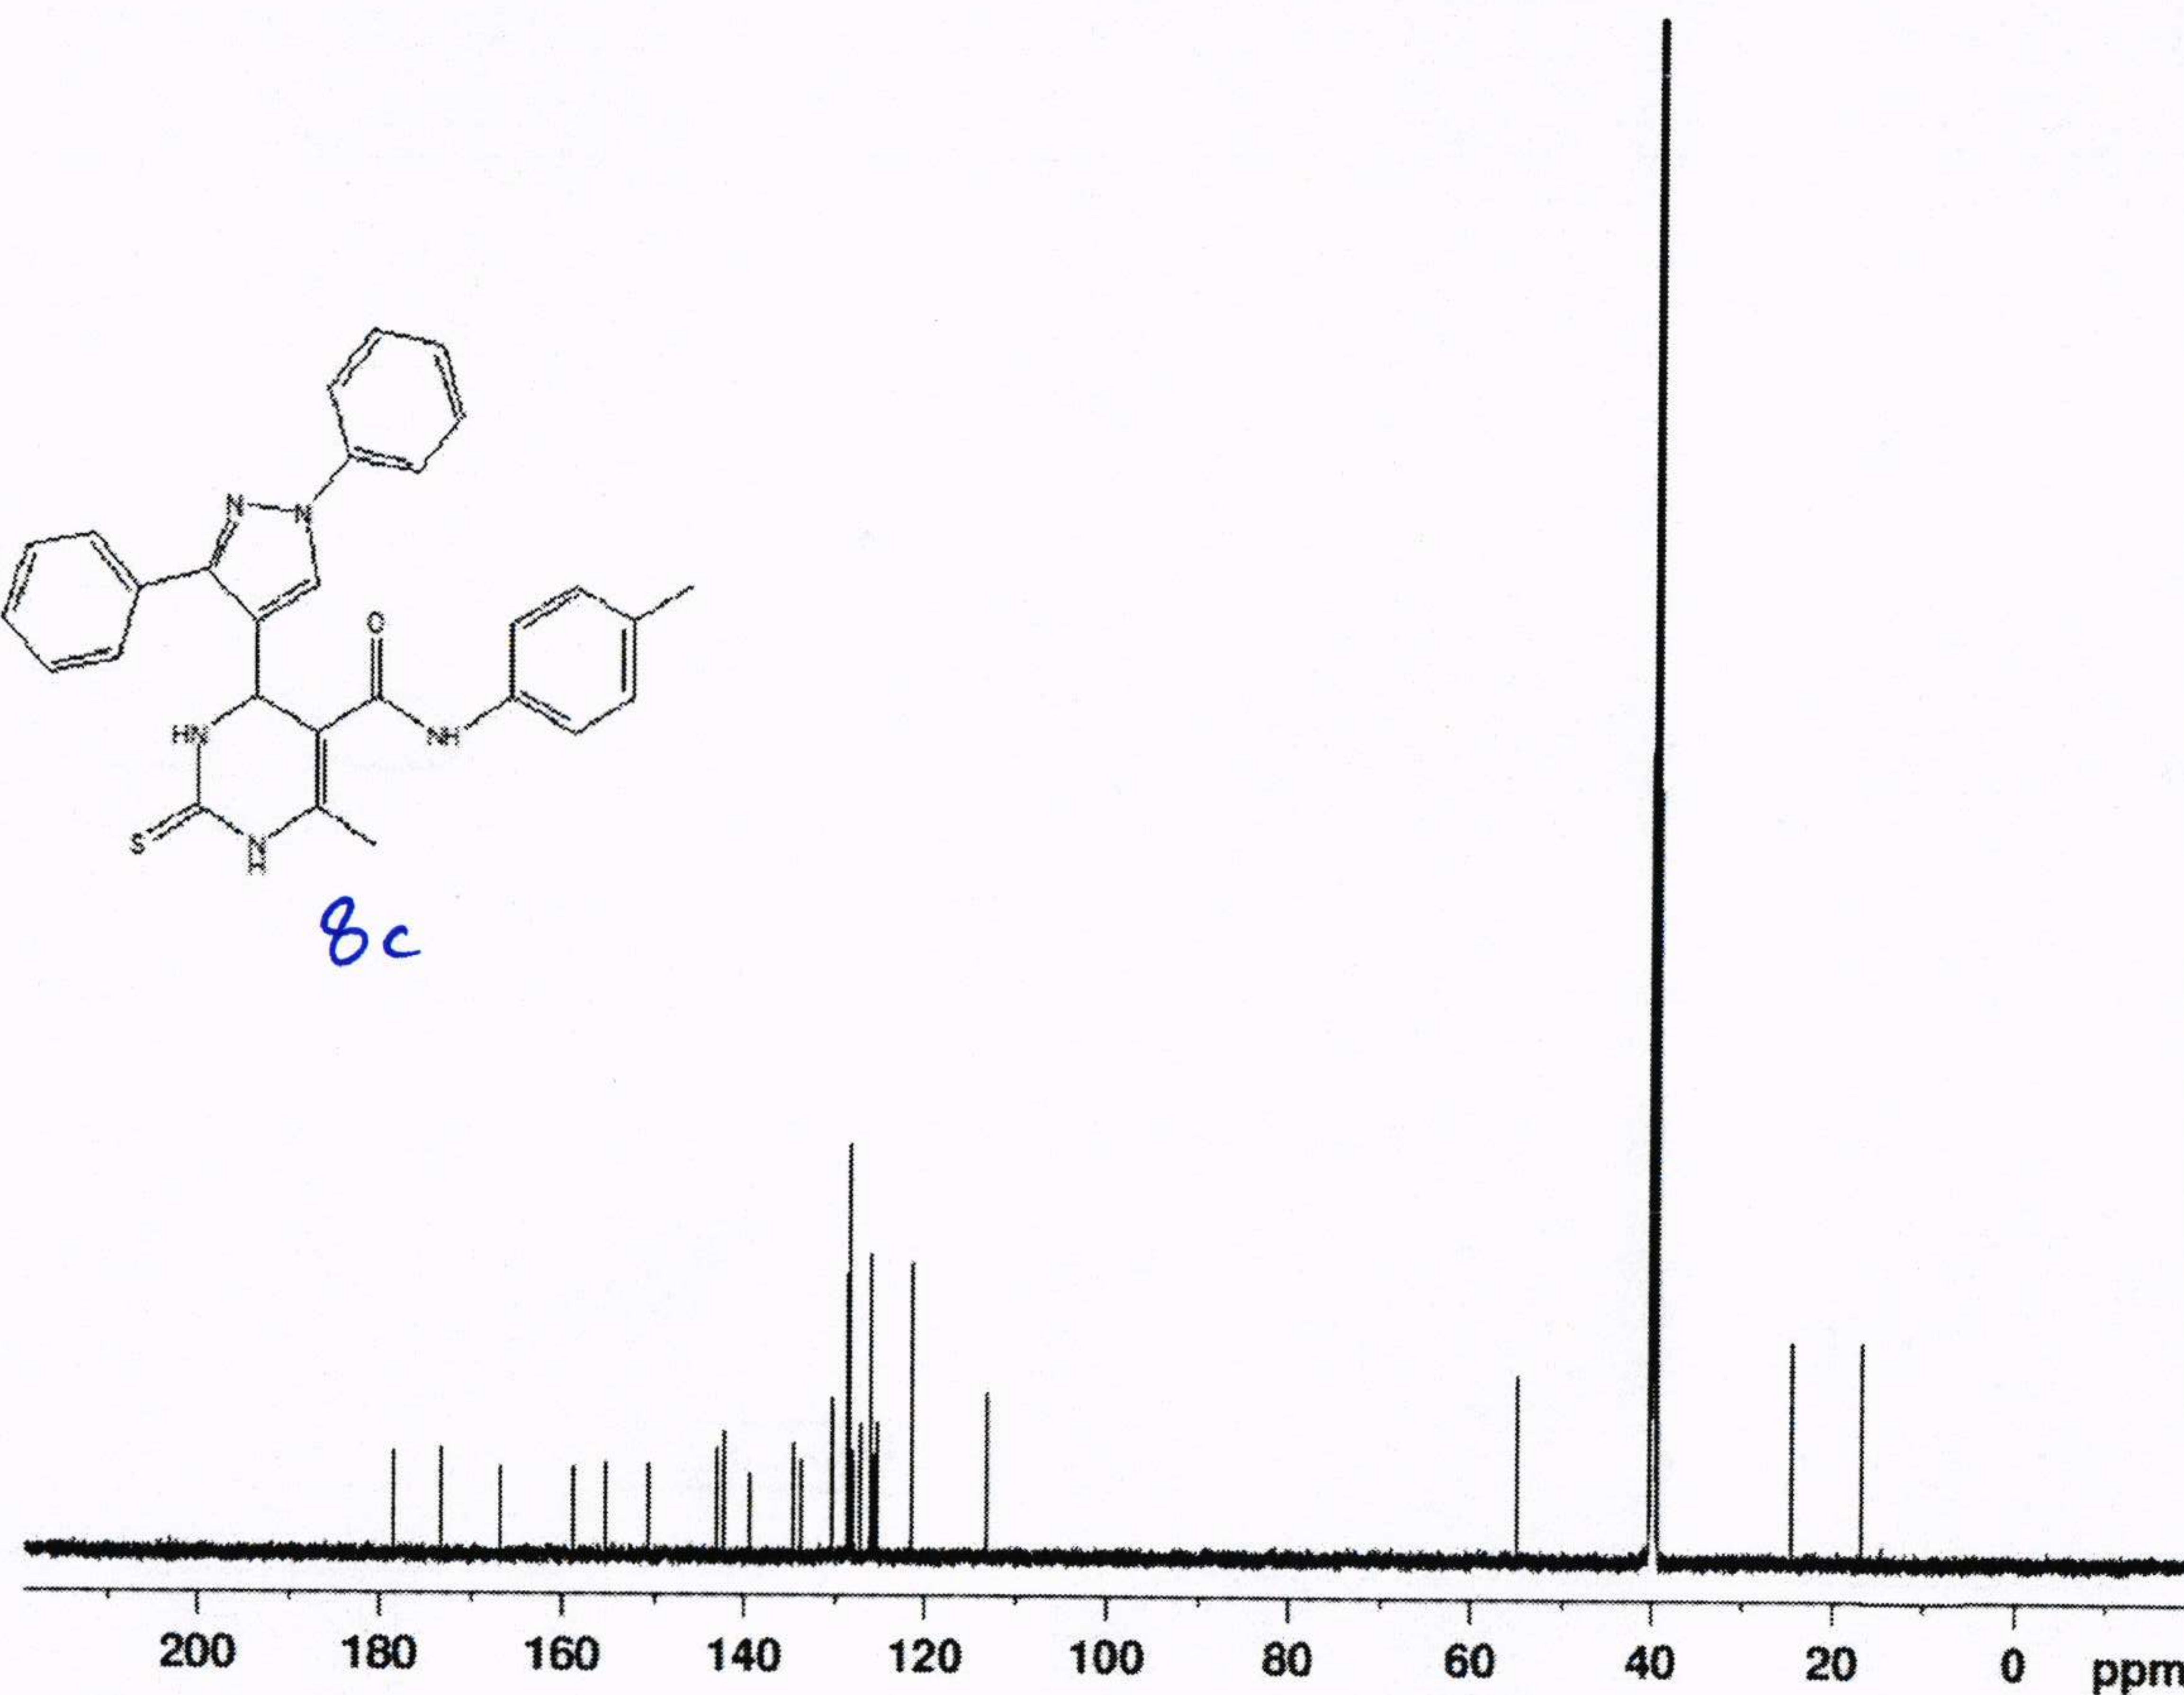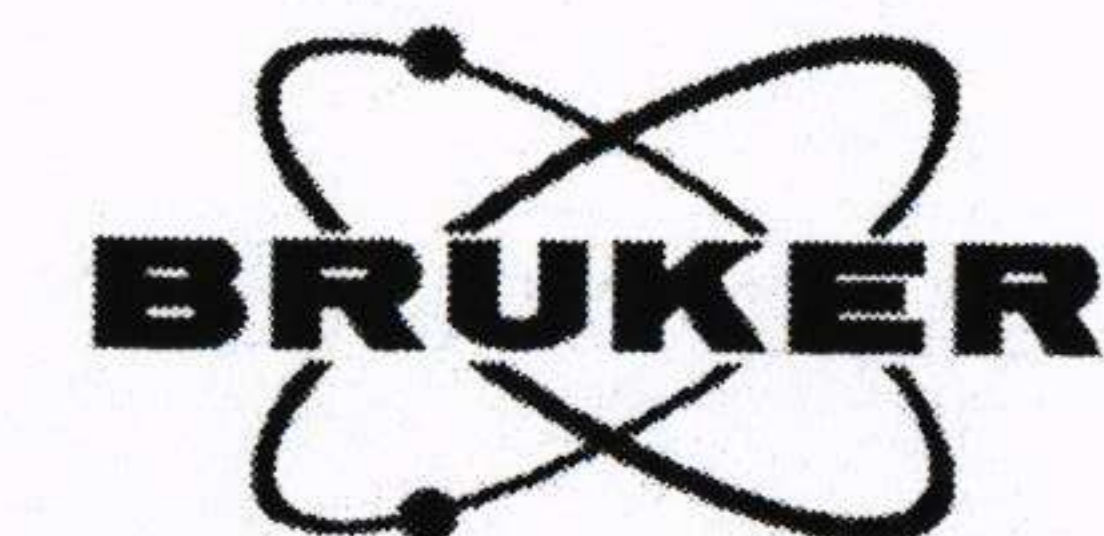

NAME drshahat-15  
EXPNO 11  
PROCNO 1  
Date\_ 20210622  
Time 12.07  
INSTRUM spect  
PROBHD 5 mm PABBO BB-  
PULPROG zgpg30  
TD 65536  
SOLVENT DMSO  
NS 1165  
DS 2  
SWH 30030.029 Hz  
FIDRES 0.458222 Hz  
AQ 1.0912410 sec  
RG 4597.6  
DW 16.650 usec  
DE 6.50 usec  
TE 299.2 K  
D1 2.00000000 sec  
D11 0.03000000 sec  
TD0 1

===== CHANNEL f1 =====  
NUC1 13C  
P1 20.00 usec  
PL1 -6.00 dB  
SFO1 125.7703643 MHz

===== CHANNEL f2 =====  
CPDPRG2 waltz16  
NUC2 1H  
PCPD2 80.00 usec  
PL2 -1.10 dB  
PL12 13.44 dB  
PL13 16.40 dB  
SFO2 500.1320005 MHz  
SI 32768  
SF 125.7577890 MHz  
WDW EM  
SSB 0  
LB 1.00 Hz  
GB 0  
PC 1.40

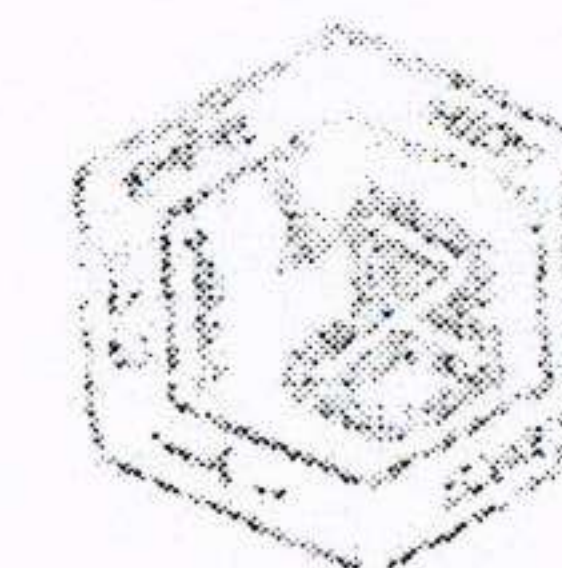



4-(1H-Indol-3-yl)-6-methyl-N-(4-nitrophenyl)-2-thioxo-1,2,3,4-tetrahydropyrimidine-5-carboxamide

9a

ON DMSO D:\ abar

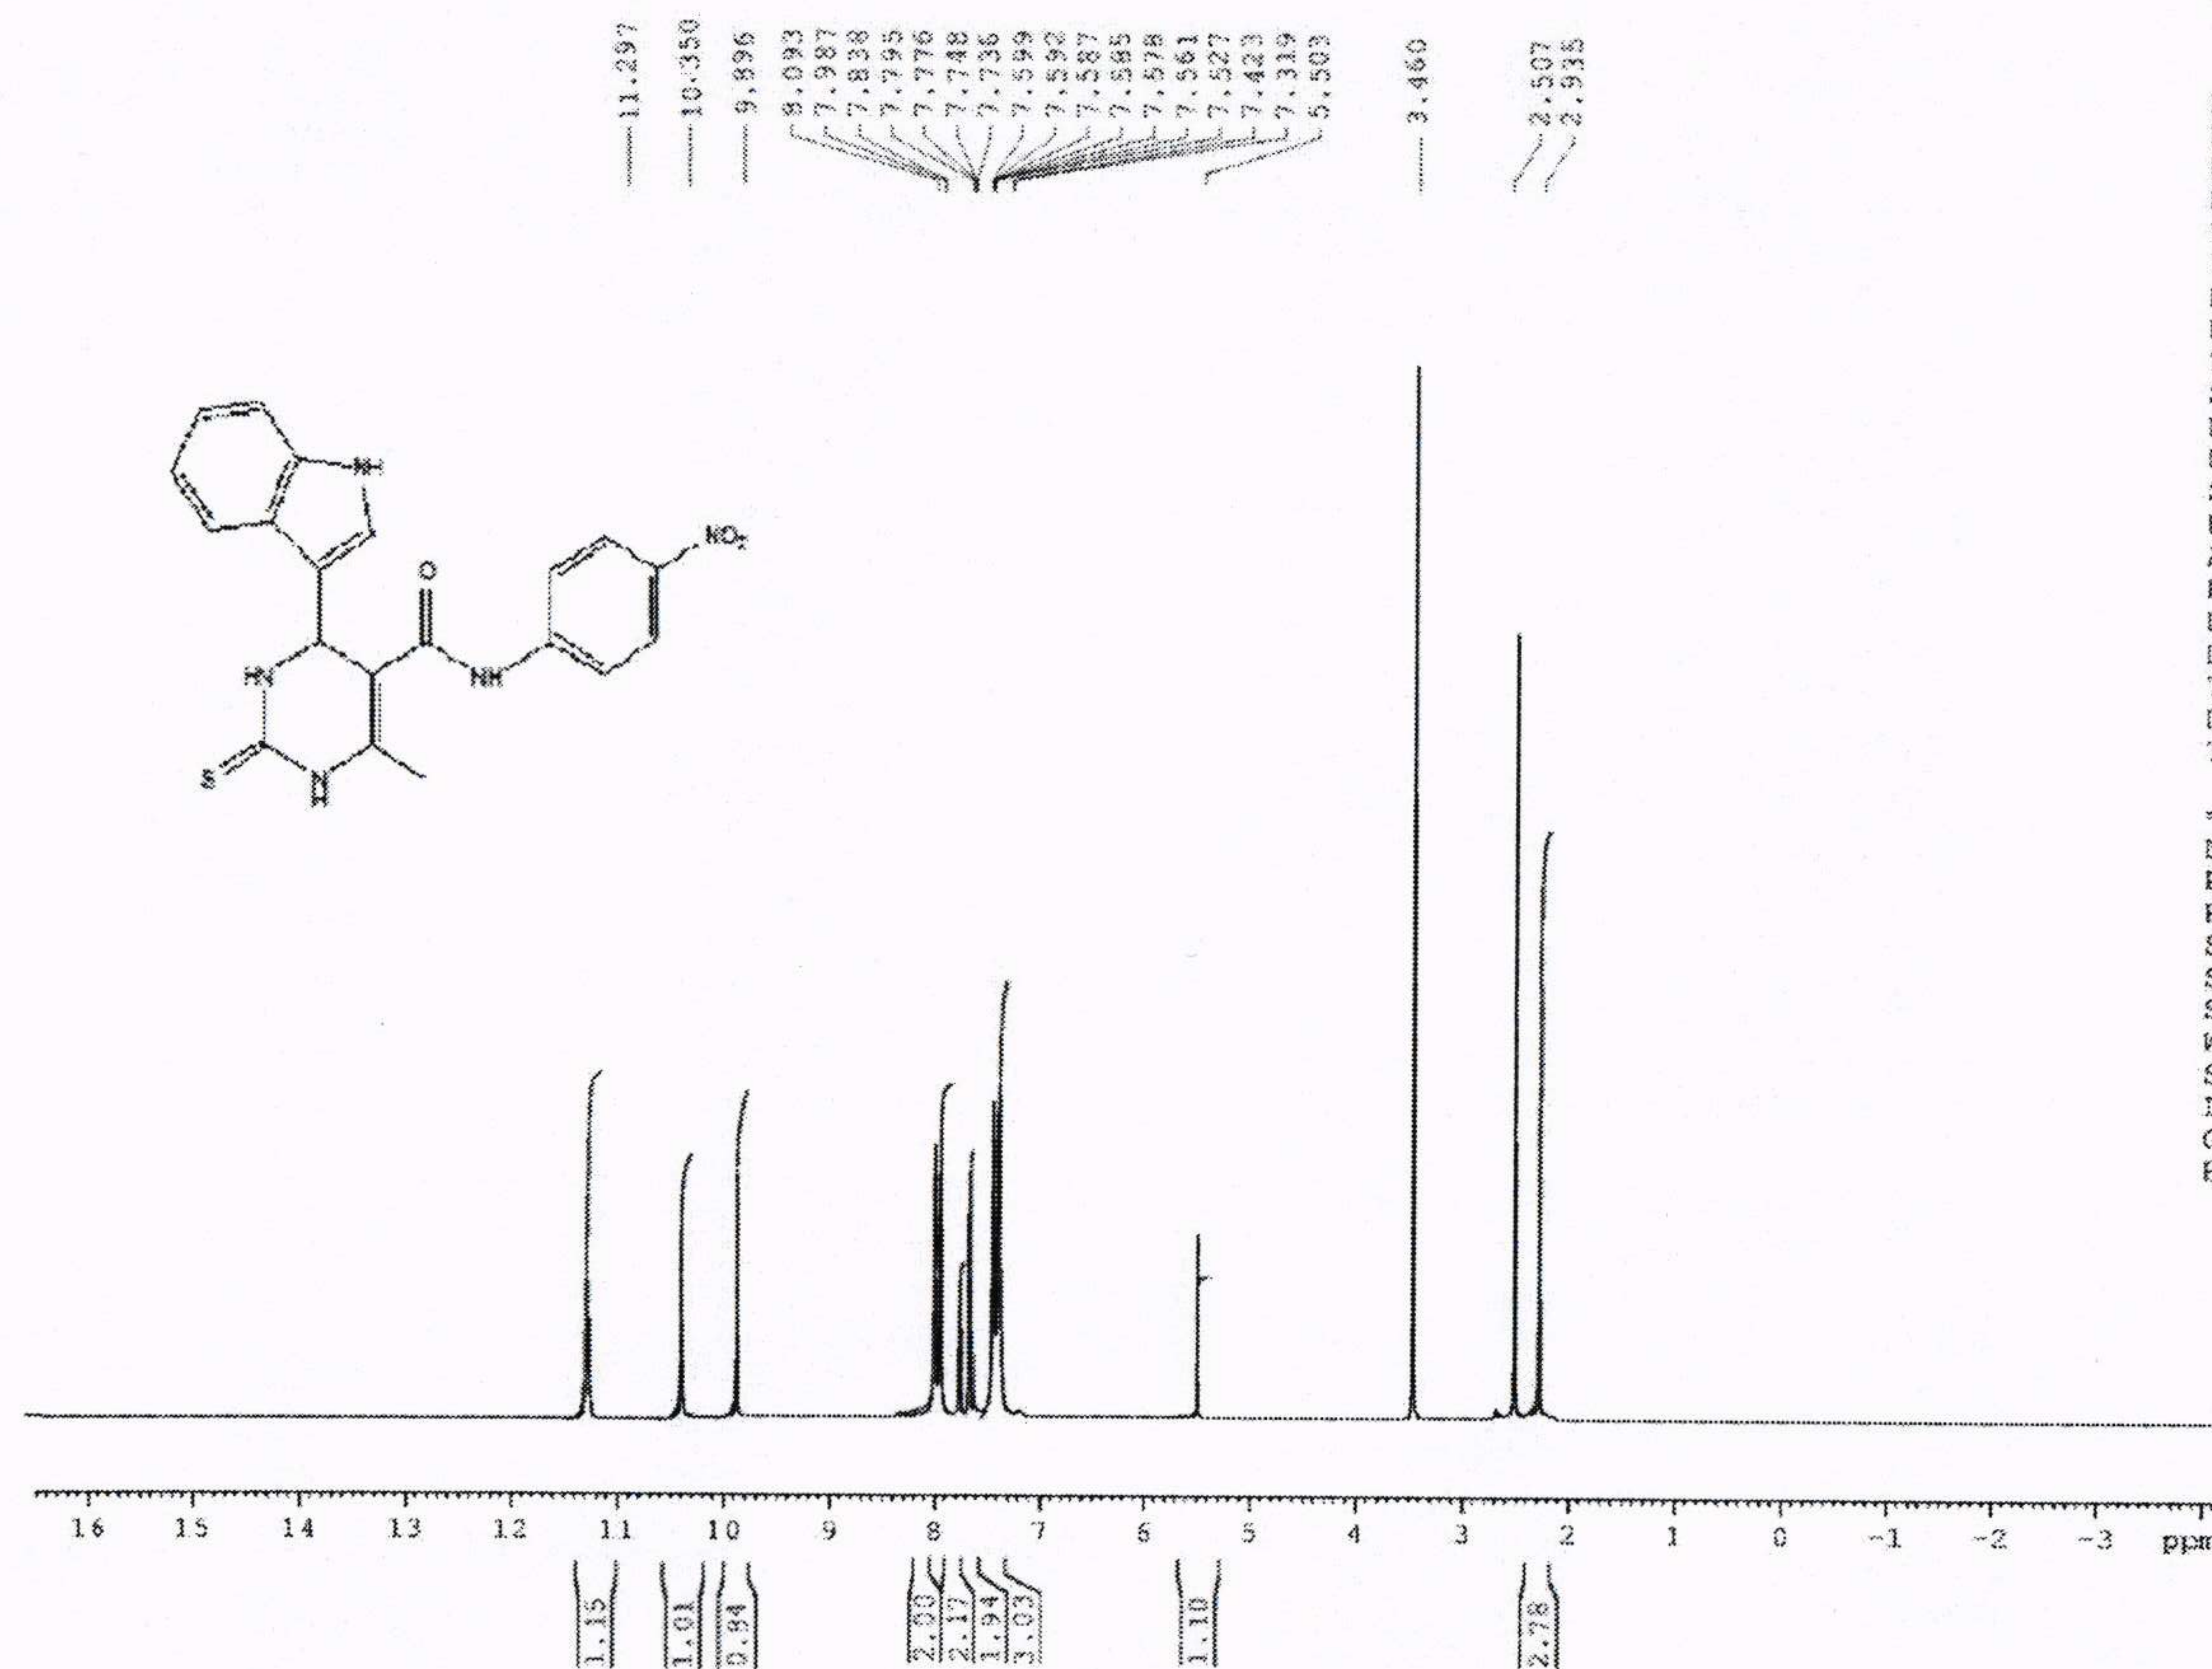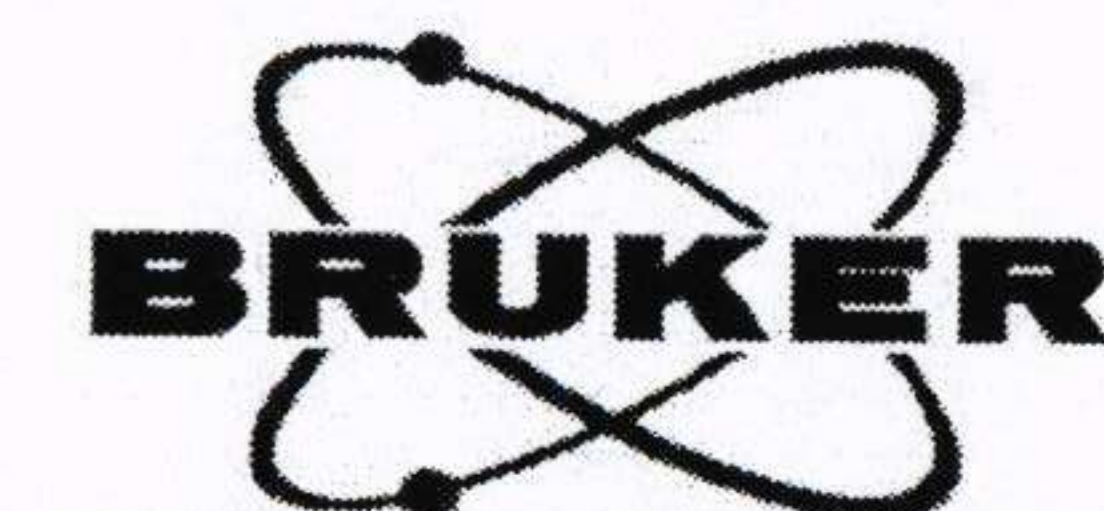

NAME drshahat-17  
 EXPNO 10  
 PROCNO 1  
 Date\_ 20210622  
 Time 18.59  
 INSTRUM spect  
 PROBHD 5 mm PABBO BB-  
 PULPROG zg30  
 TD 65536  
 SOLVENT DMSO  
 NS 16  
 DS 2  
 SWH 10330.578 Hz  
 FIDRES 0.157632 Hz  
 AQ 3.1720407 sec  
 RG 90.5  
 DW 48.400 usec  
 DE 6.50 usec  
 TE 298.3 K  
 D1 1.00000000 sec  
 TD0 1

===== CHANNEL f1 =====  
 NUC1 1H  
 P1 14.70 usec  
 PL1 -1.10 dB  
 SFO1 500.1330885 MHz  
 SI 32768  
 SF 500.1300000 MHz  
 WDW EM  
 SSB 0  
 LB 0.30 Hz  
 GB 0  
 PC 1.00

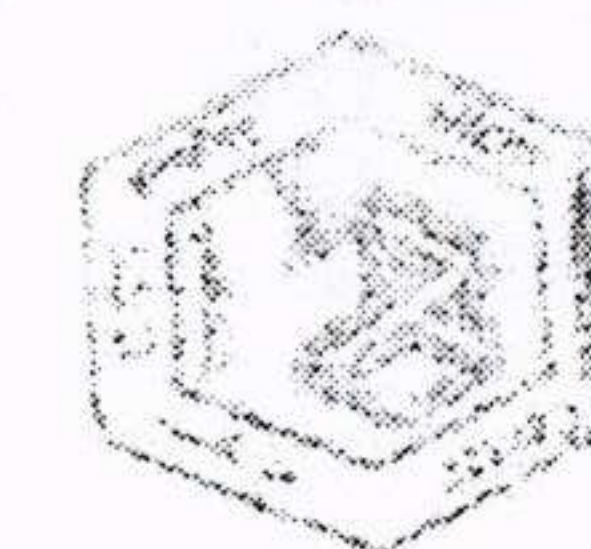



C13CPD32 DMSO D:\\ abari 46

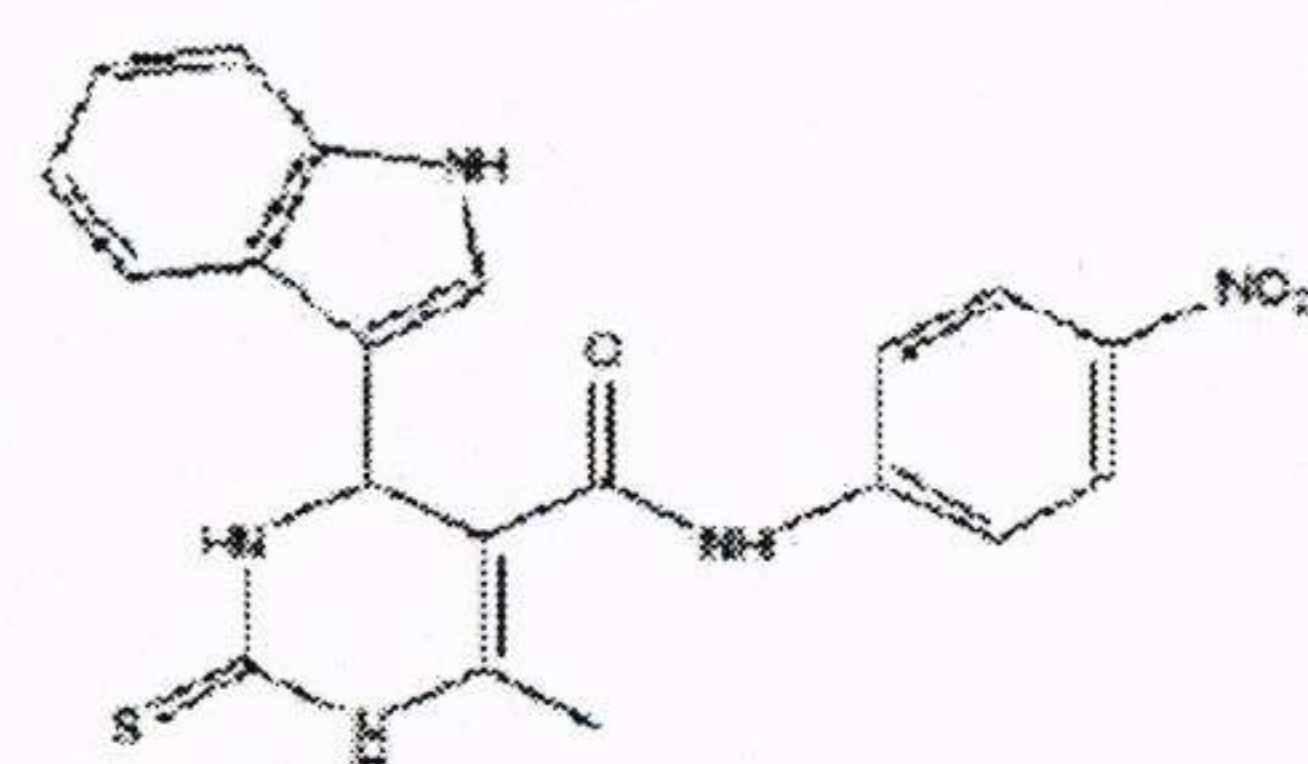

9a

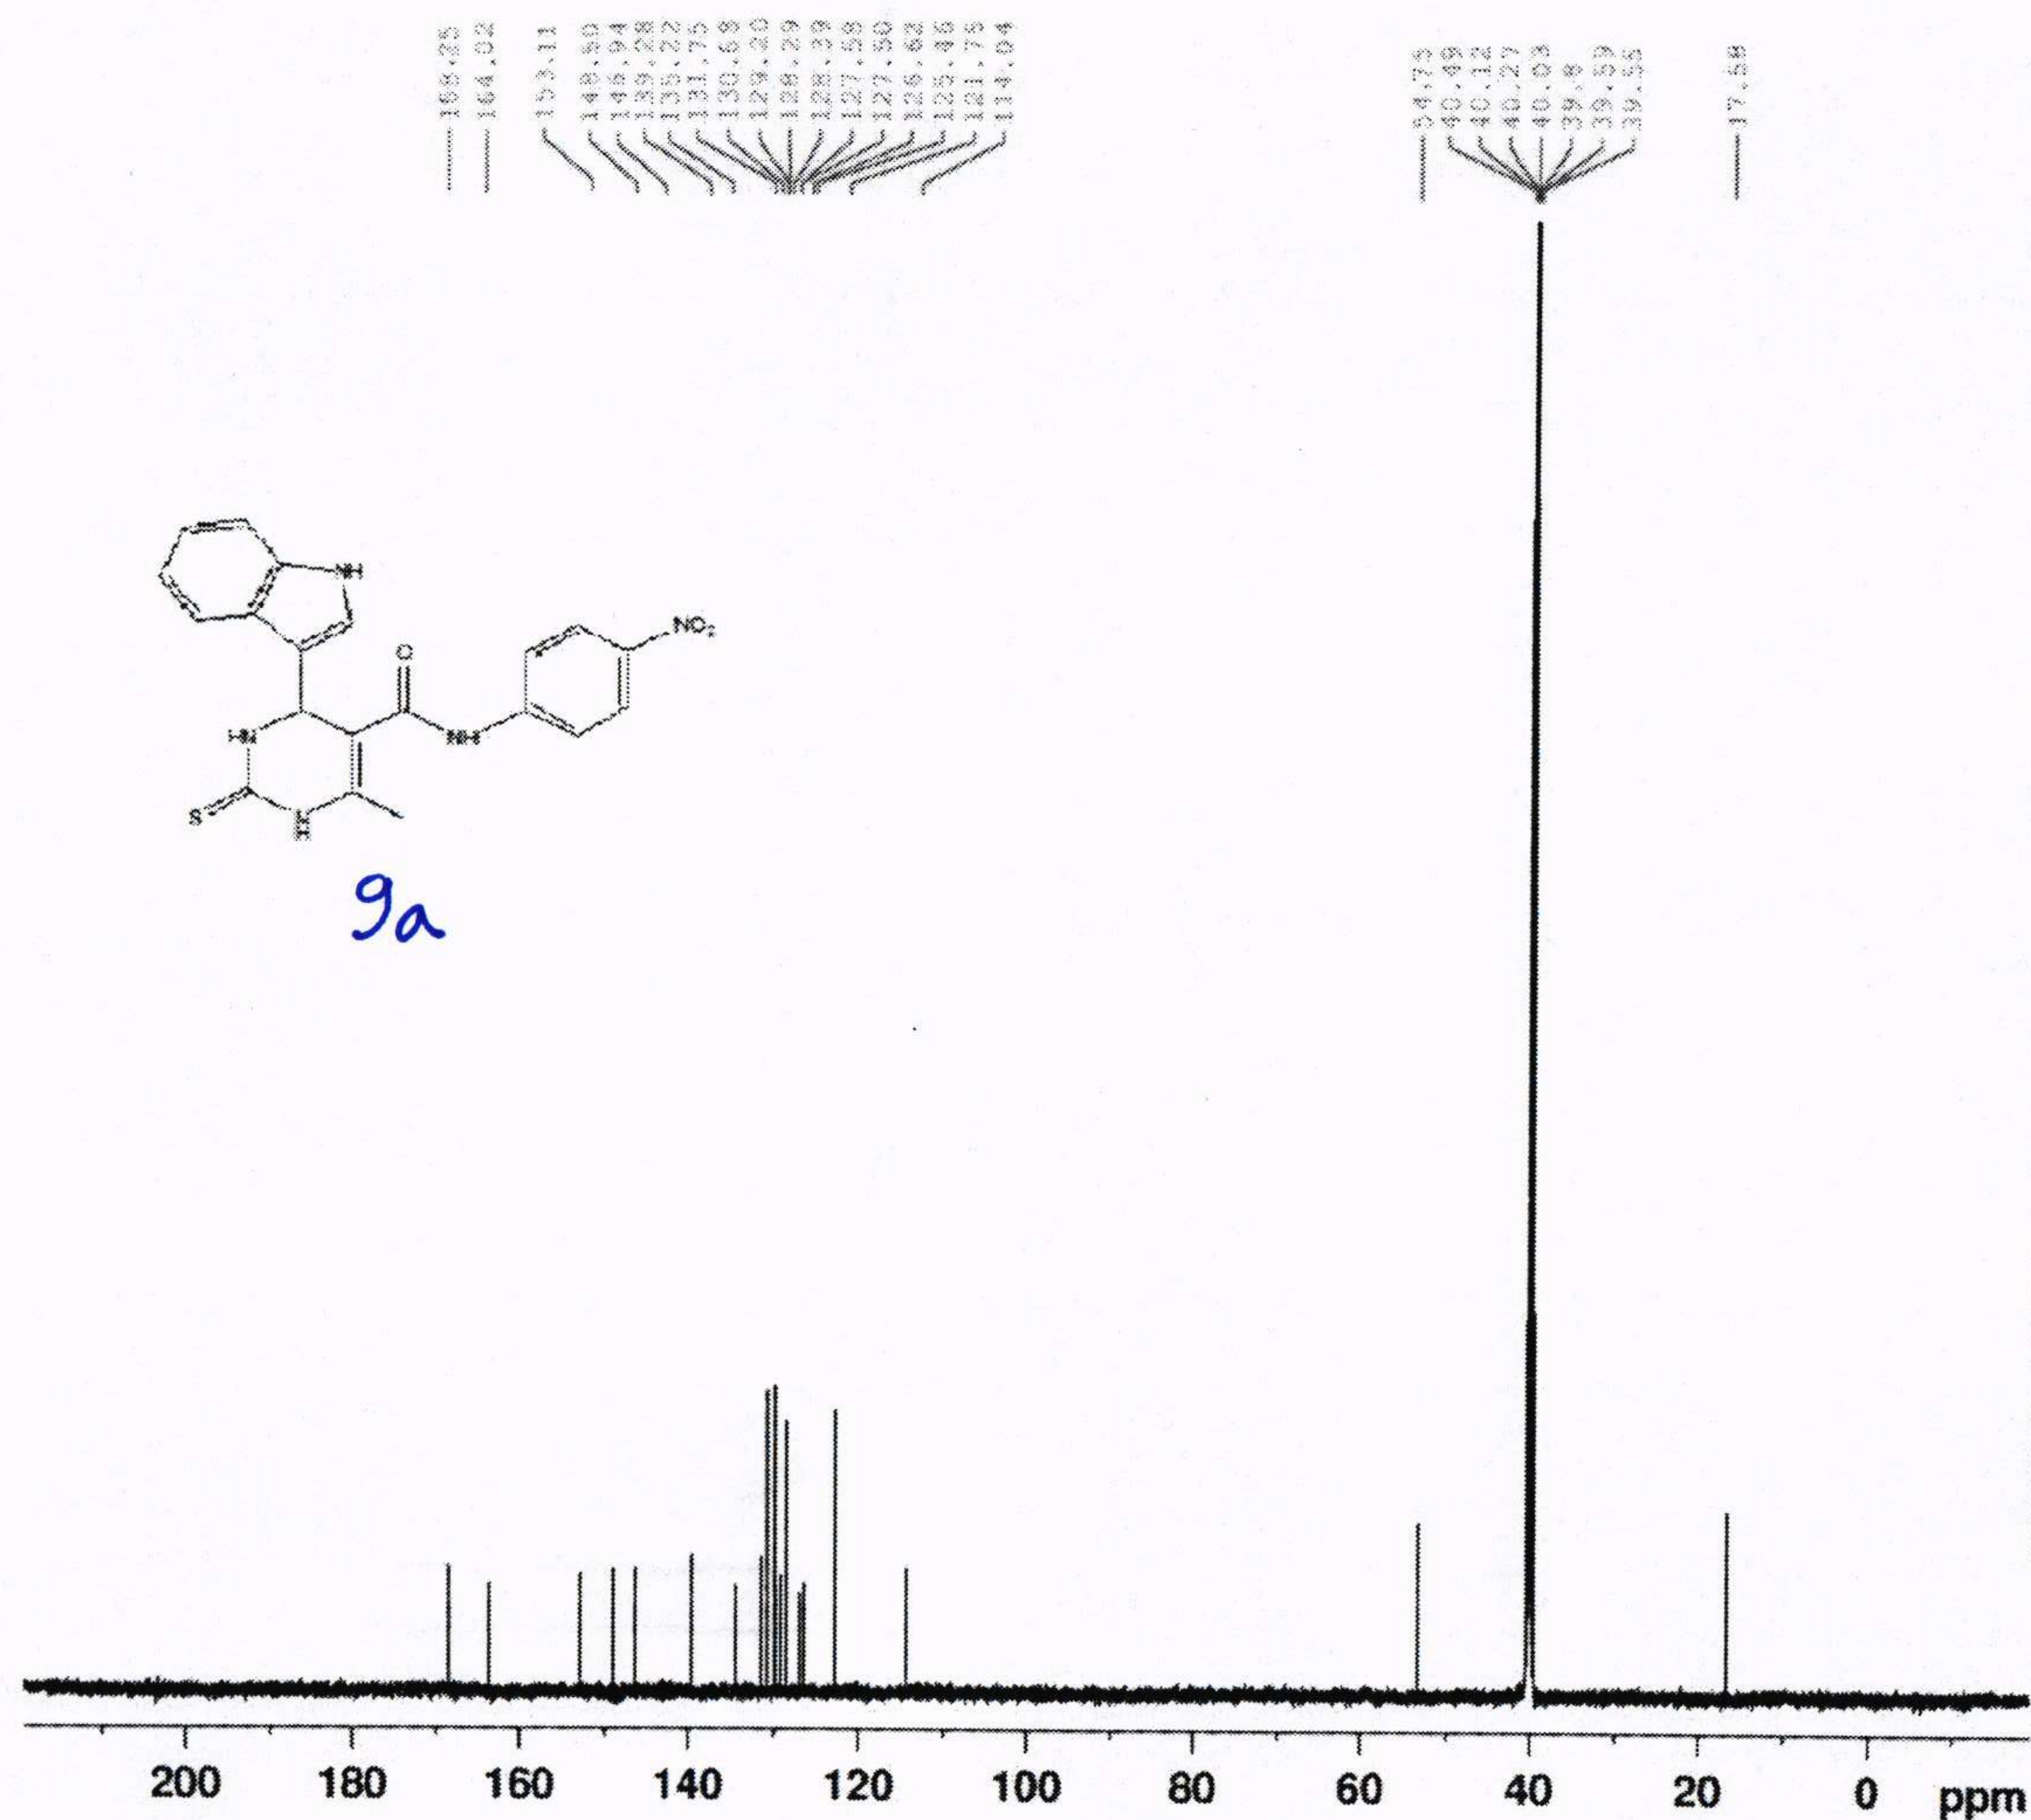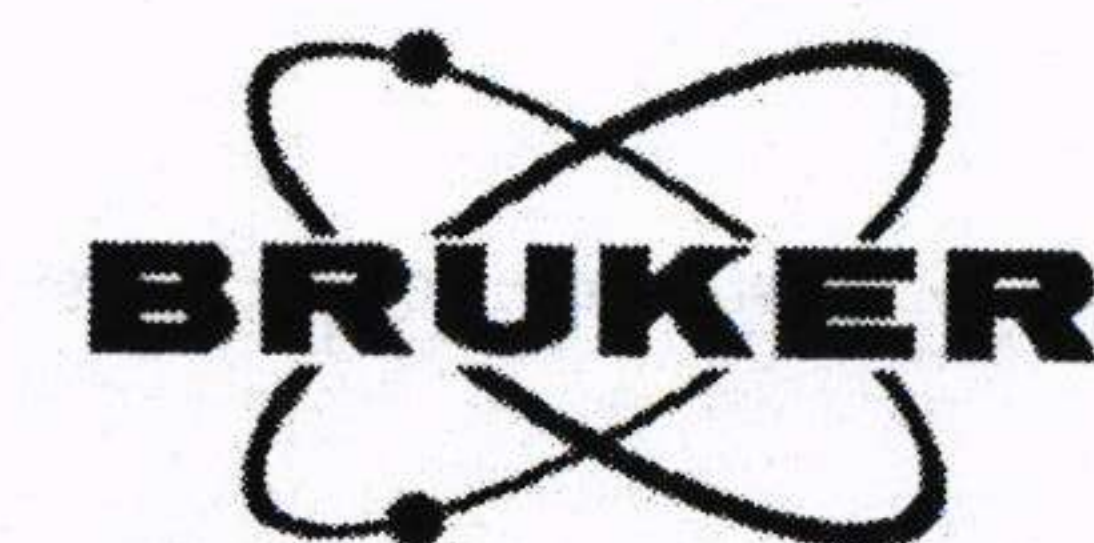

NAME drshahat-17  
 EXPNO 11  
 PROCNO 1  
 Date\_ 20210622  
 Time 20.47  
 INSTRUM spect  
 PROBHD 5 mm PABBO BB-  
 PULPROG zgpg30  
 TD 65536  
 SOLVENT DMSO  
 NS 2000  
 DS 2  
 SWH 30030.029 Hz  
 FIDRES 0.458222 Hz  
 AQ 1.0912410 sec  
 RG 14596.5  
 DW 16.650 usec  
 DE 6.50 usec  
 TE 299.1 K  
 D1 2.00000000 sec  
 D11 0.03000000 sec  
 TD0 1

===== CHANNEL f1 =====  
 NUC1 13C  
 P1 20.00 usec  
 PL1 -6.00 dB  
 SFO1 125.7703643 MHz

===== CHANNEL f2 =====  
 CPDPRG2 waltz16  
 NUC2 1H  
 PCPD2 80.00 usec  
 PL2 -1.10 dB  
 PL12 13.44 dB  
 PL13 16.40 dB  
 SFO2 500.1320005 MHz  
 SI 32768  
 SF 125.7577890 MHz  
 WDW EM  
 SSB 0  
 LB 1.00 Hz  
 GB 0  
 PC 1.40

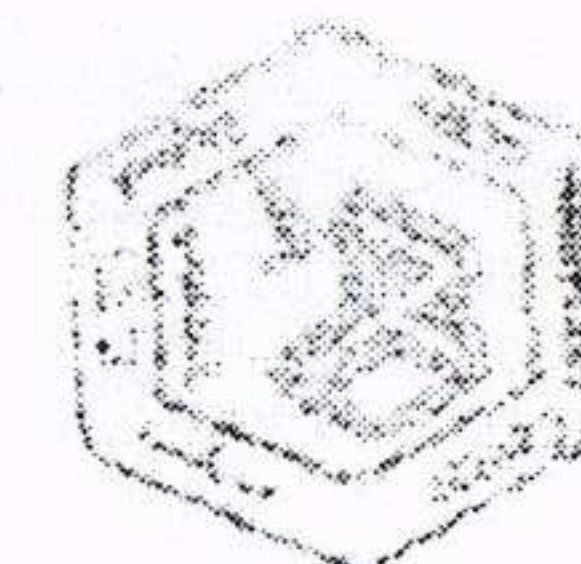



4-(2-Chloroquinolin-3-yl)-6-methyl-N-(4-nitrophenyl)-2-thioxo-1,2,3,4-tetrahydropyrimidine-5-carboxamide

96

ON DMSO D:\ abar

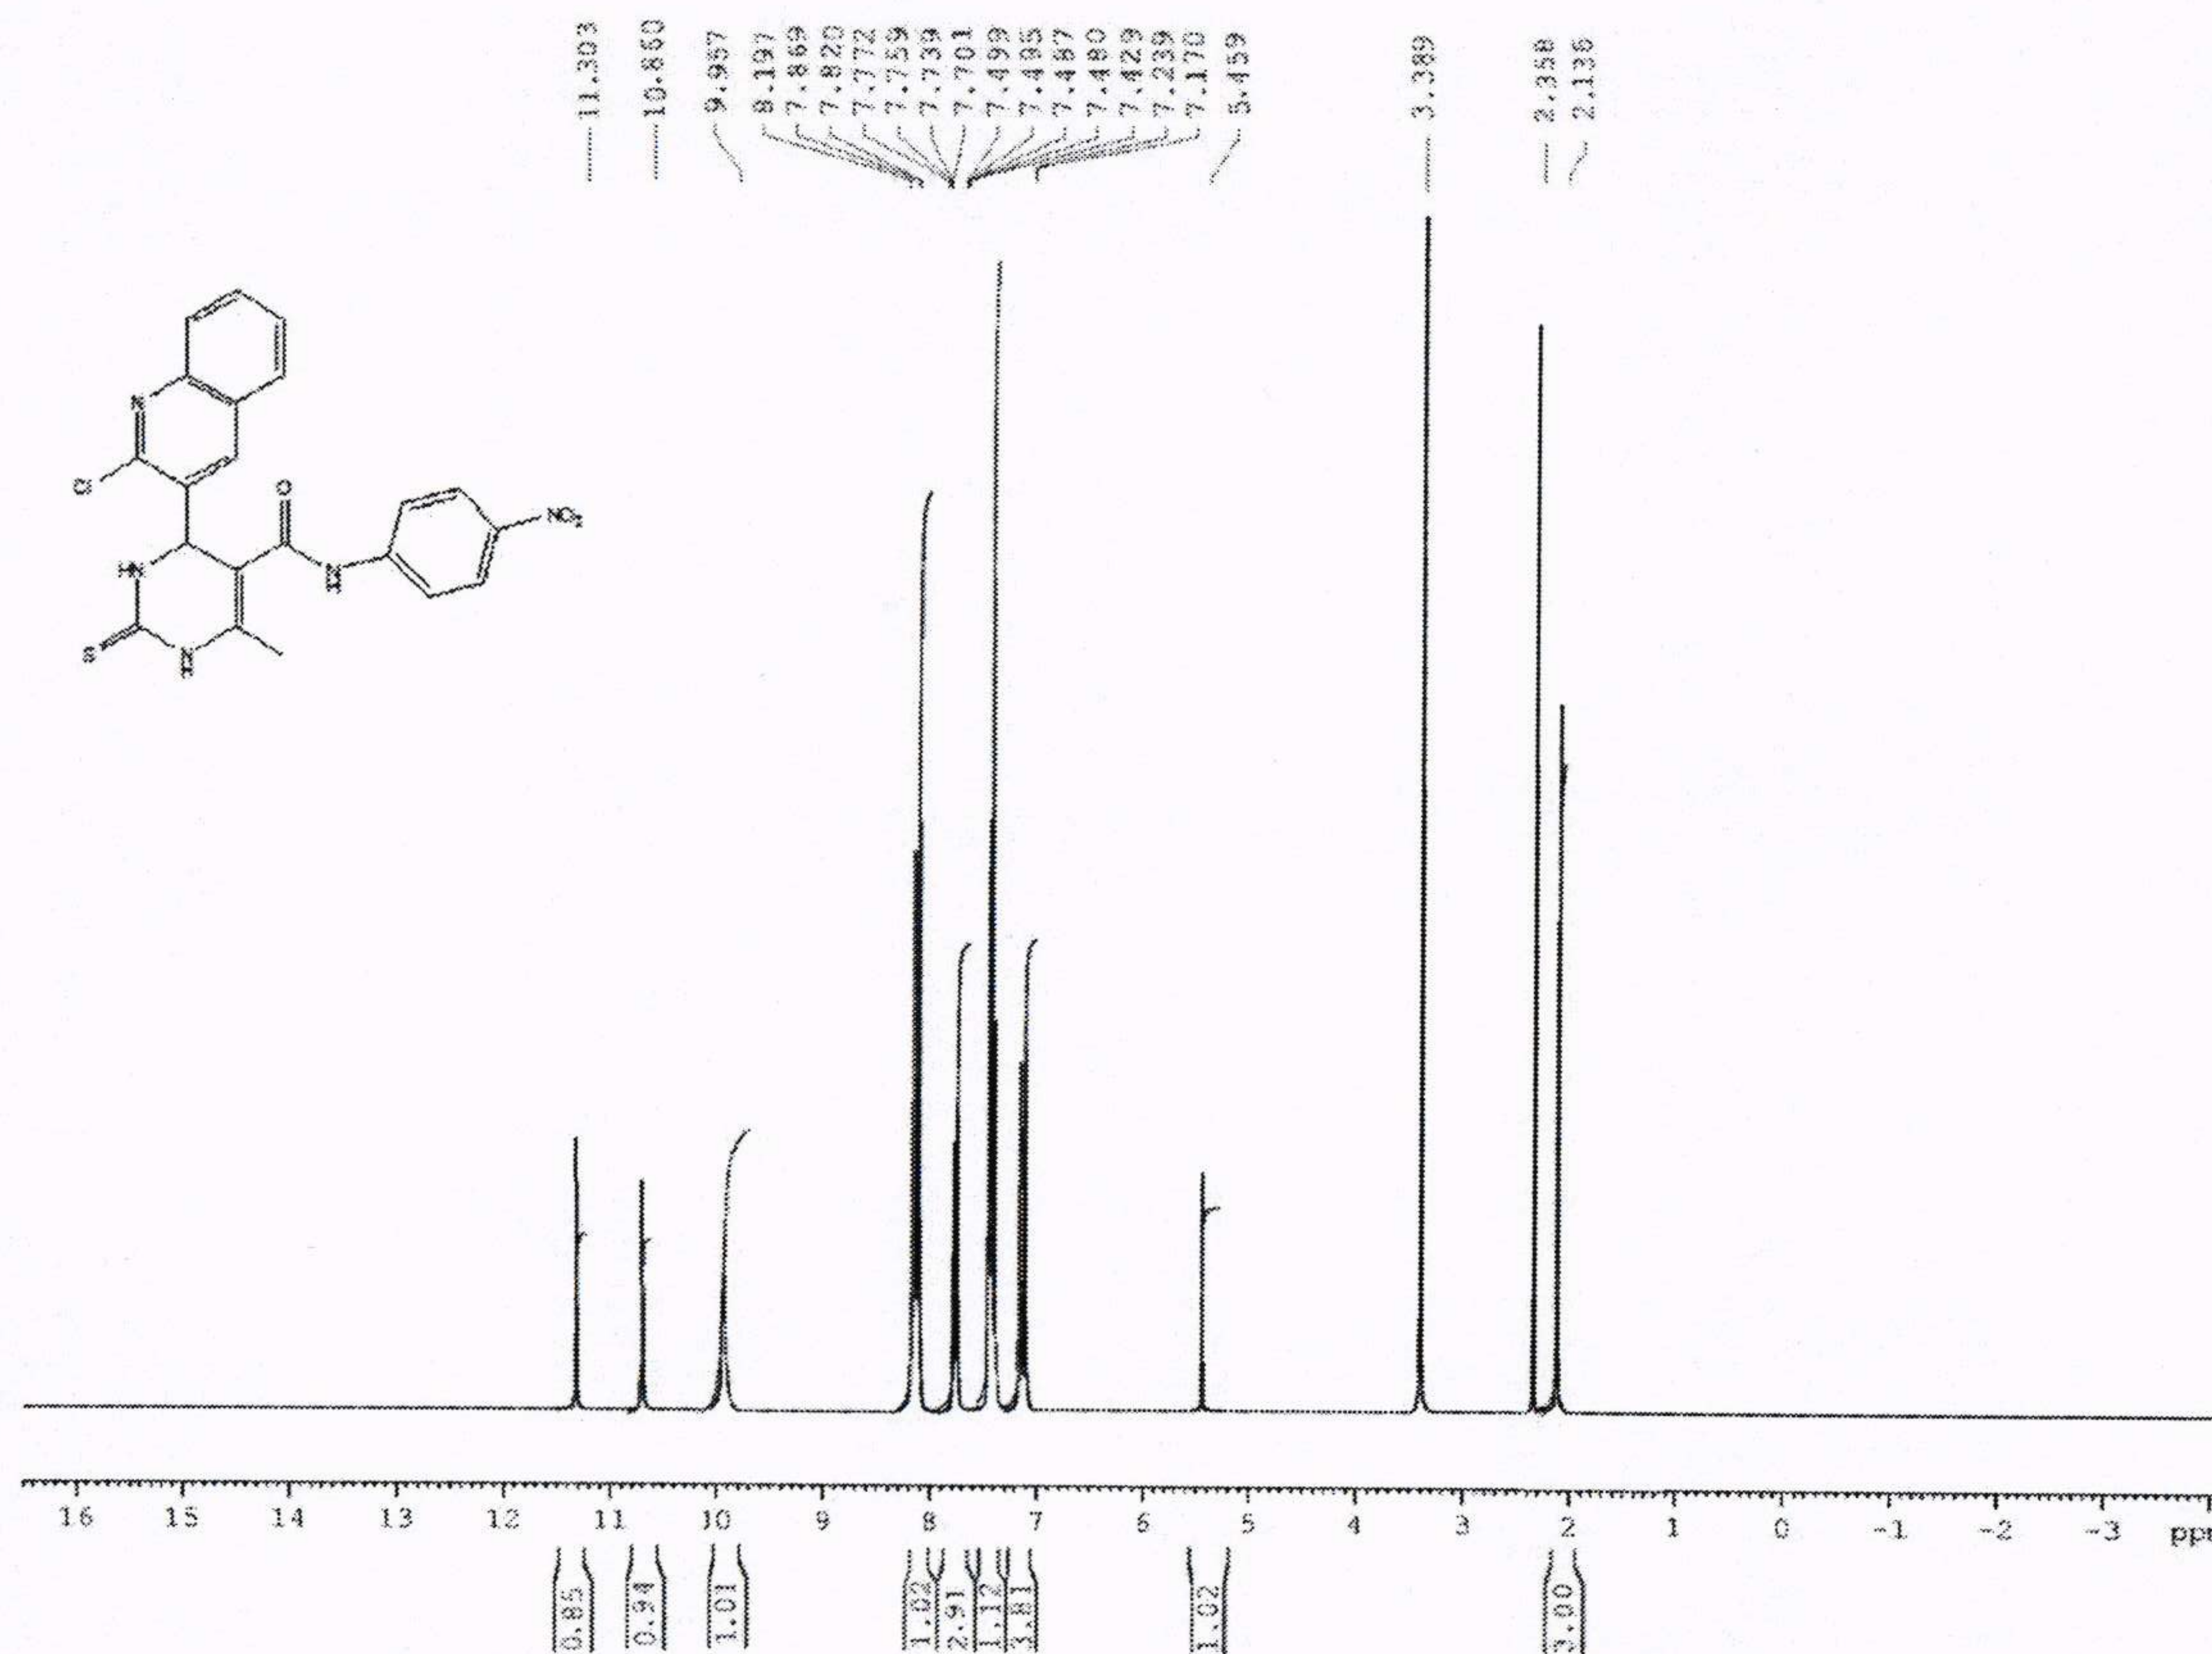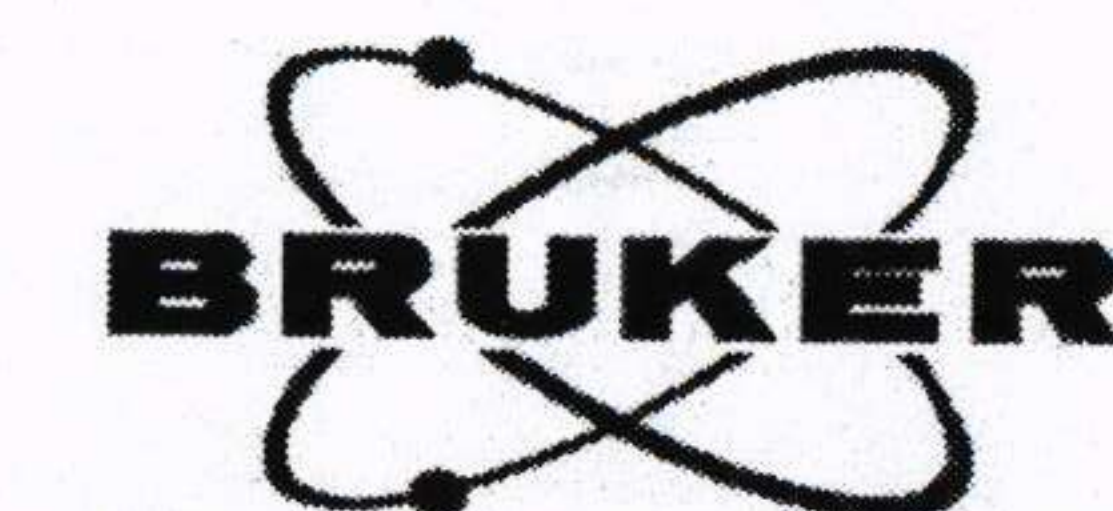

NAME drshahat-16  
EXPNO 10  
PROCNO 1  
Date\_ 20210622  
Time 18.59  
INSTRUM spect  
PROBHD 5 mm PABBO BB-  
PULPROG zg30  
TD 65536  
SOLVENT DMSO  
NS 16  
DS 2  
SWH 10330.578 Hz  
FIDRES 0.157632 Hz  
AQ 3.1720407 sec  
RG 90.5  
DW 48.400 usec  
DE 6.50 usec  
TE 298.3 K  
D1 1.00000000 sec  
TDO 1

----- CHANNEL f1 -----  
NUC1 1H  
P1 14.70 usec  
PL1 -1.10 dB  
SFO1 500.1330885 MHz  
SI 32768  
SF 500.1300000 MHz  
WDW EM  
SSB 0  
LB 0.30 Hz  
GB 0  
PC 1.00

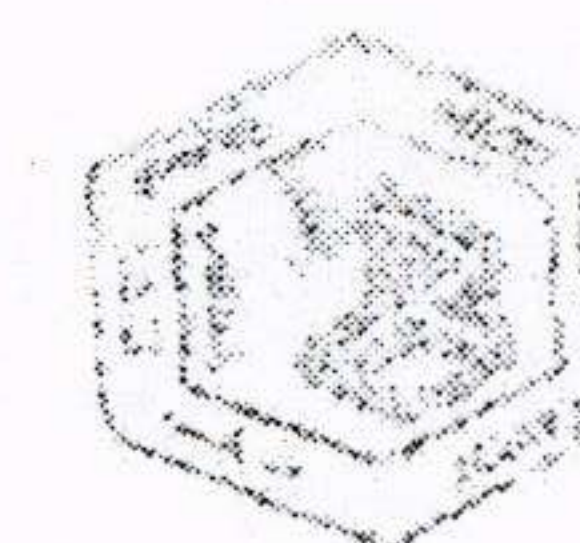



C13CPD32 DMSO D:\ abari 46

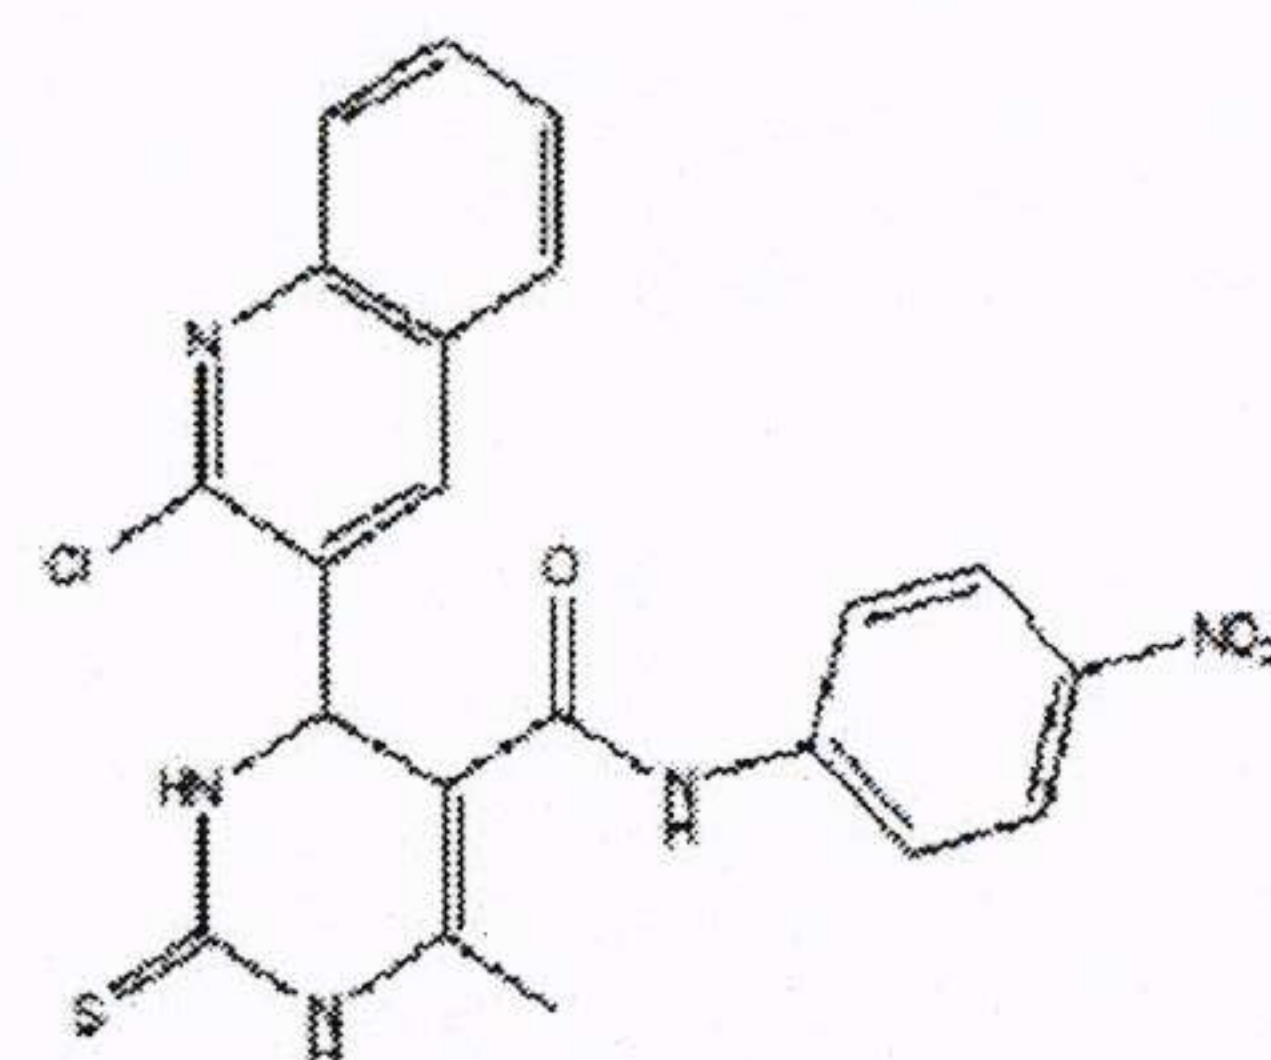

9b

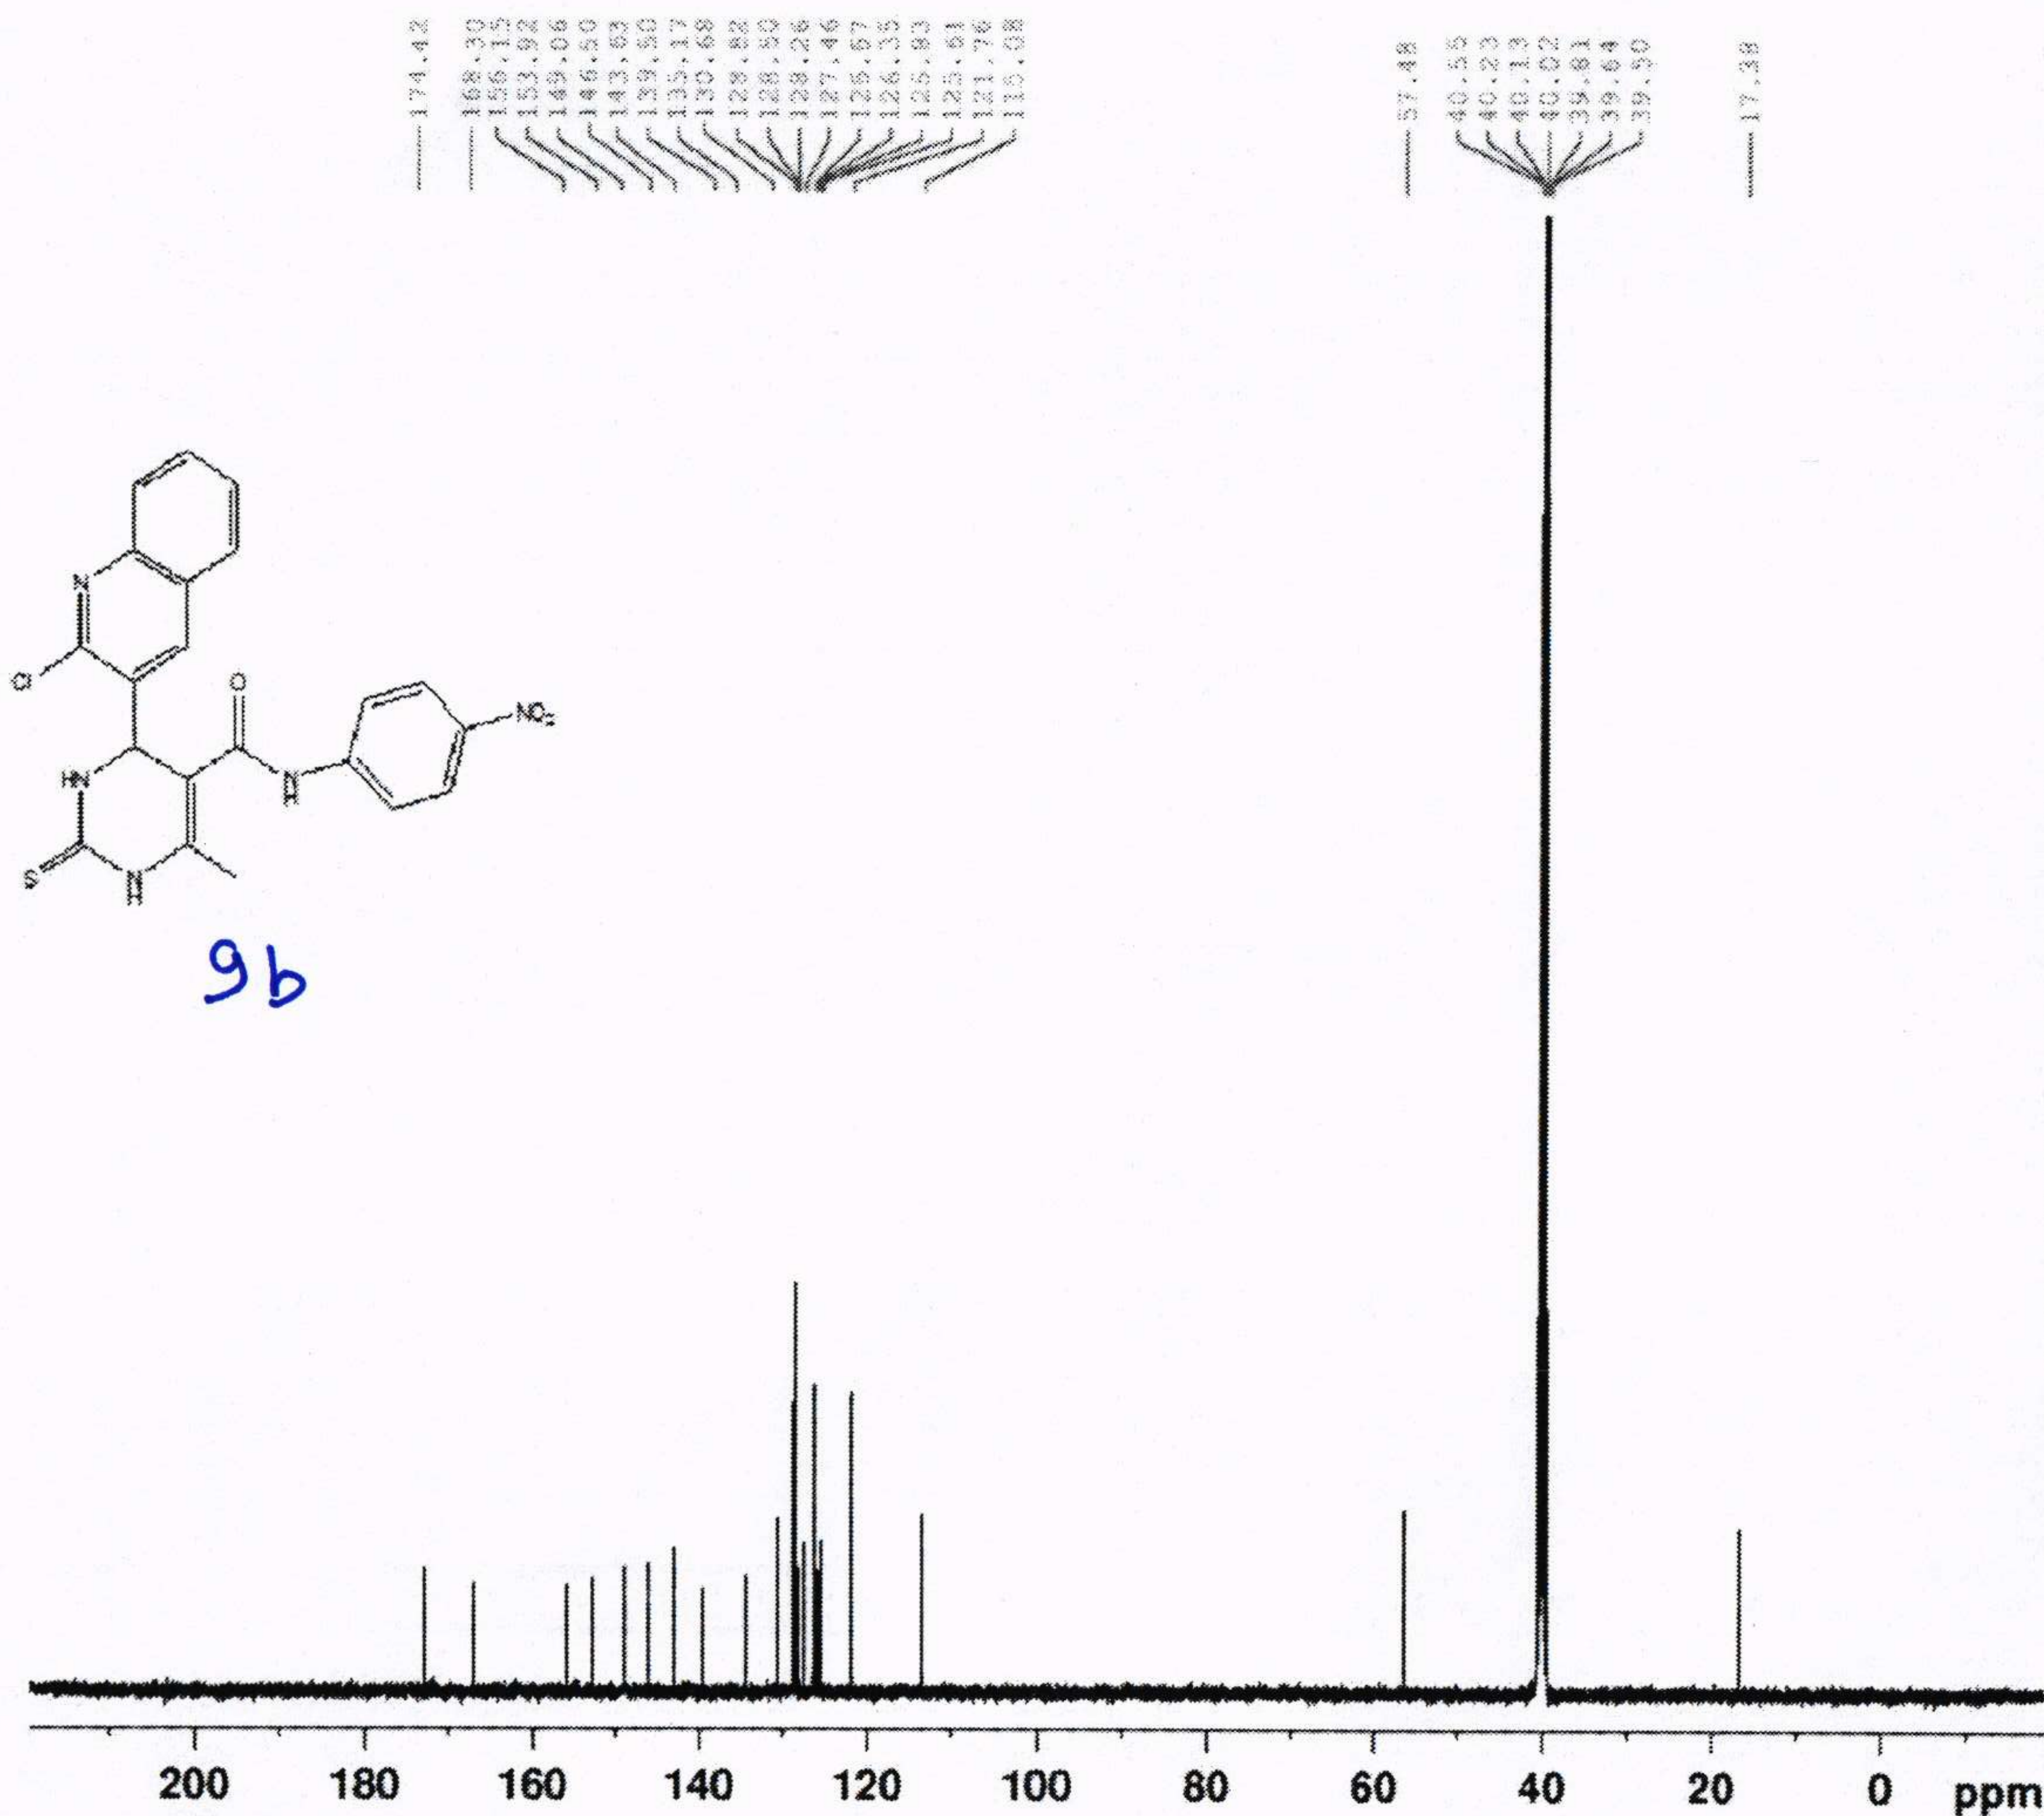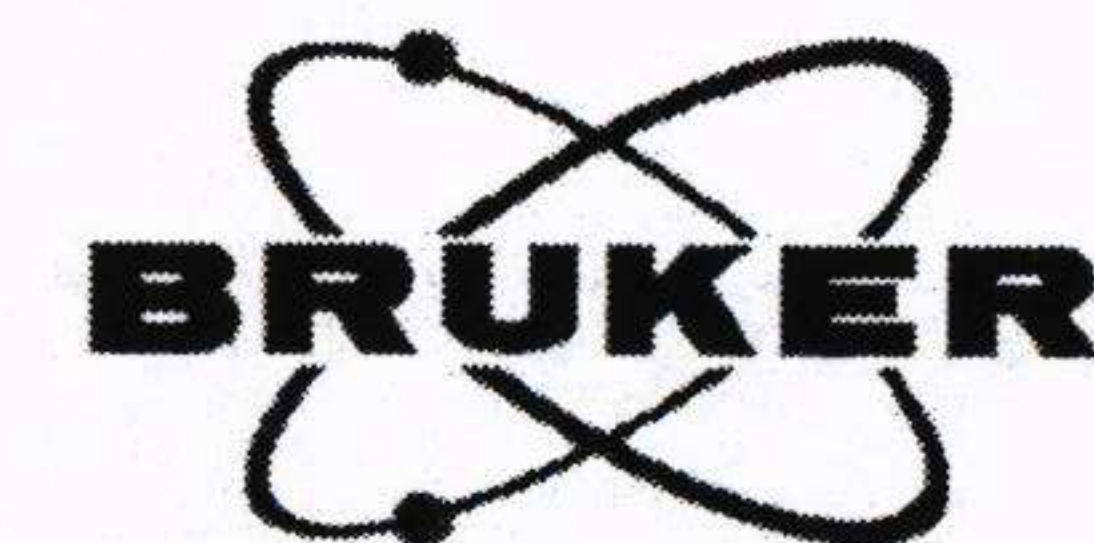

NAME drshahat-16  
 EXPNO 11  
 PROCNO 1  
 Date\_ 20210622  
 Time 20.47  
 INSTRUM spect  
 PROBHD 5 mm PABBO BB-  
 PULPROG zgpg30  
 TD 65536  
 SOLVENT DMSO  
 NS 2000  
 DS 2  
 SWH 30030.029 Hz  
 FIDRES 0.458222 Hz  
 AQ 1.0912410 sec  
 RG 14596.5  
 DW 16.650 usec  
 DE 6.50 usec  
 TE 299.1 K  
 D1 2.00000000 sec  
 D11 0.03000000 sec  
 TD0 1

===== CHANNEL f1 =====  
 NUC1 13C  
 P1 20.00 usec  
 PL1 -6.00 dB  
 SFO1 125.7703643 MHz

===== CHANNEL f2 =====  
 CPDPRG2 waltz16  
 NUC2 1H  
 PCPD2 80.00 usec  
 PL2 -1.10 dB  
 PL12 13.44 dB  
 PL13 16.40 dB  
 SFO2 500.1320005 MHz  
 SI 32768  
 SF 125.7577890 MHz  
 WDW EM  
 SSB 0  
 LB 1.00 Hz  
 GB 0  
 PC 1.40

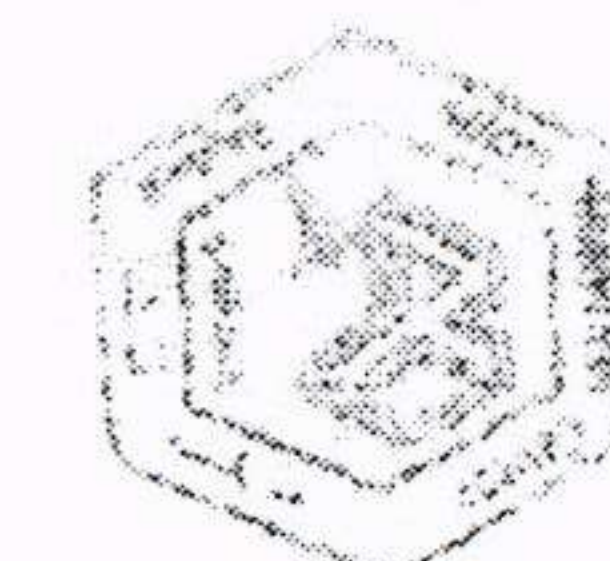



4-(1,3-Diphenyl-1H-pyrazol-4-yl)-6-methyl-N-(4-nitrophenyl)-2-thioxo-1,2,3,4-tetrahydropyrimidine-5-carboxamide 9c

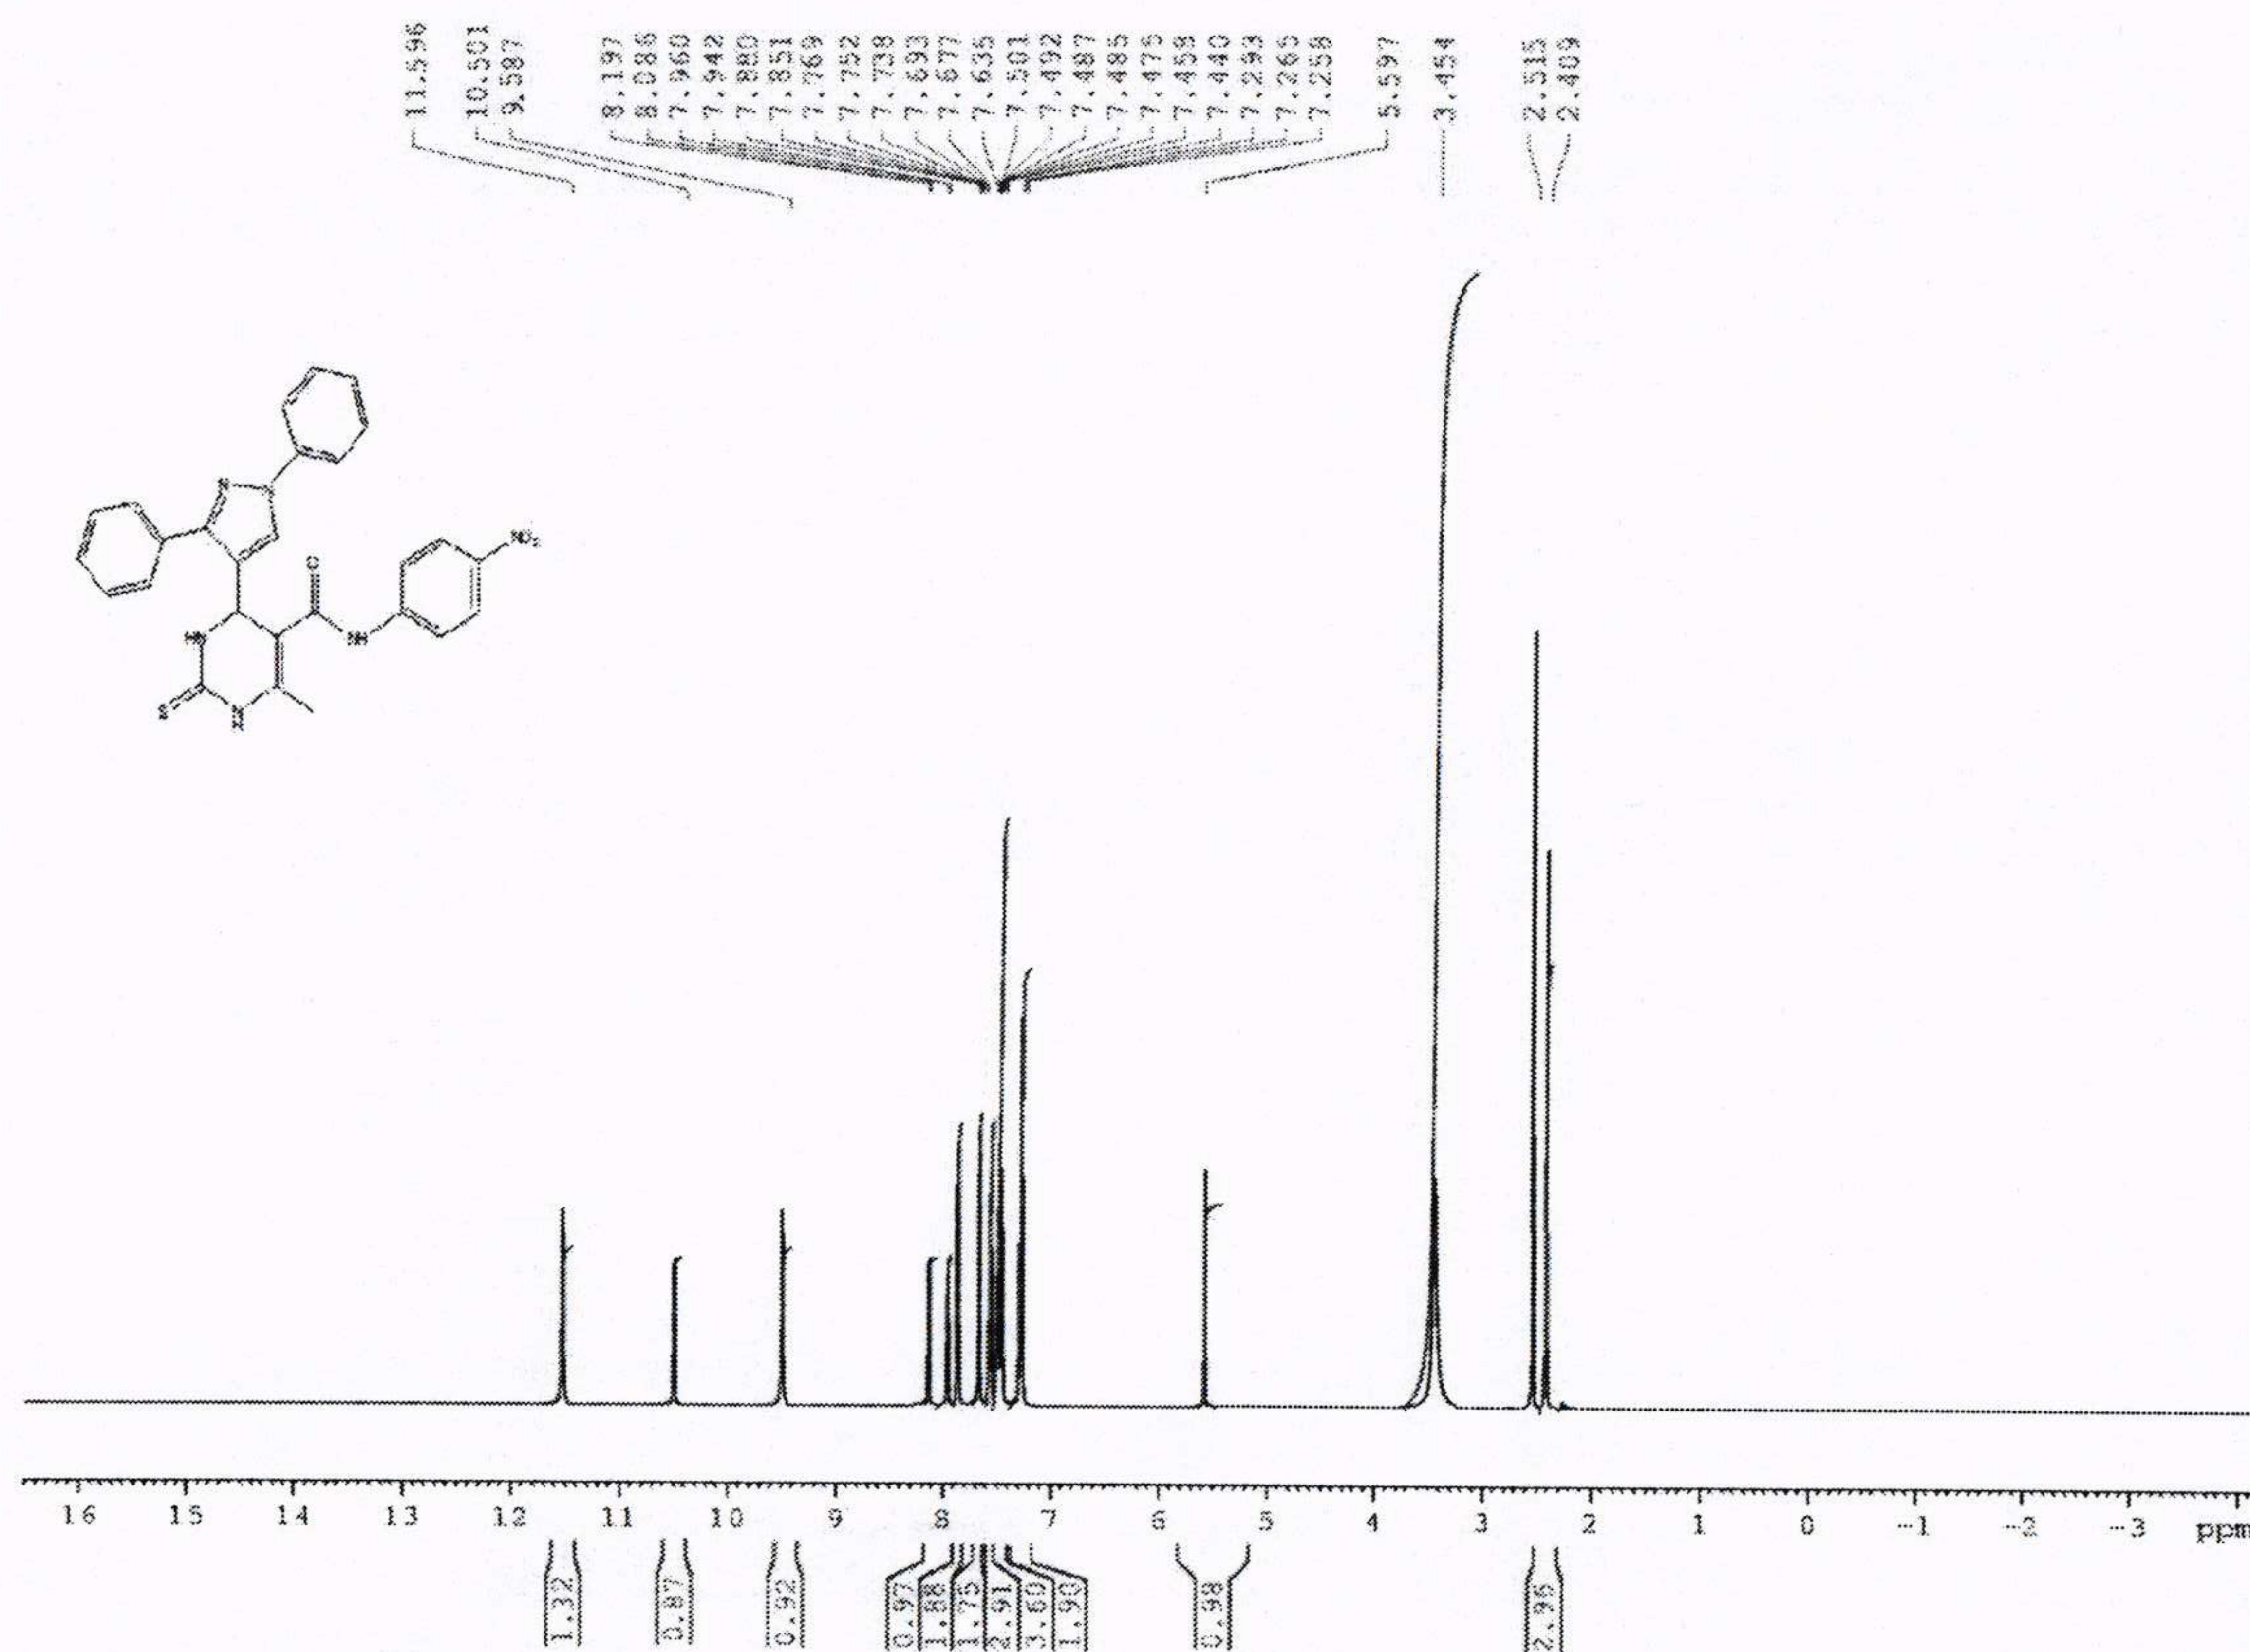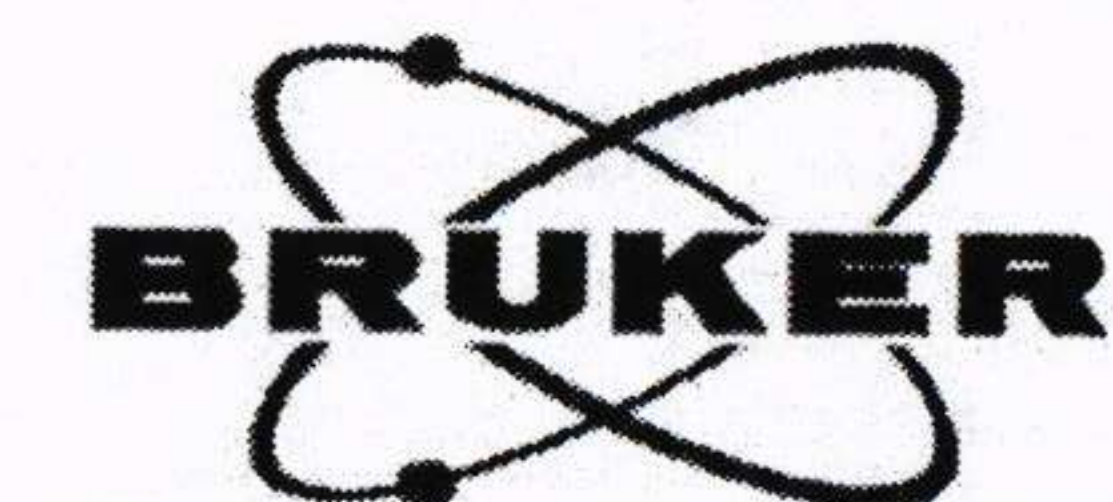

NAME drshahat-18  
 EXPNO 10  
 PROCNO 1  
 Date\_ 20210622  
 Time 11.17  
 INSTRUM spect  
 PROBHD 5 mm PABBO BB-  
 PULPROG zg30  
 TD 65536  
 SOLVENT DMSO  
 NS 16  
 DS 2  
 SWH 10330.578 Hz  
 FIDRES 0.157632 Hz  
 AQ 3.1720407 sec  
 RG 128  
 DW 48.400 usec  
 DE 6.50 usec  
 TE 298.3 K  
 D1 1.00000000 sec  
 TDO 1

----- CHANNEL f1 -----  
 NUC1 1H  
 P1 14.70 usec  
 PL1 -1.10 dB  
 SFO1 500.1330885 MHz  
 SI 32768  
 SF 500.1300000 MHz  
 WDW EM  
 SSB 0  
 LB 0.30 Hz  
 GB 0  
 PC 1.00

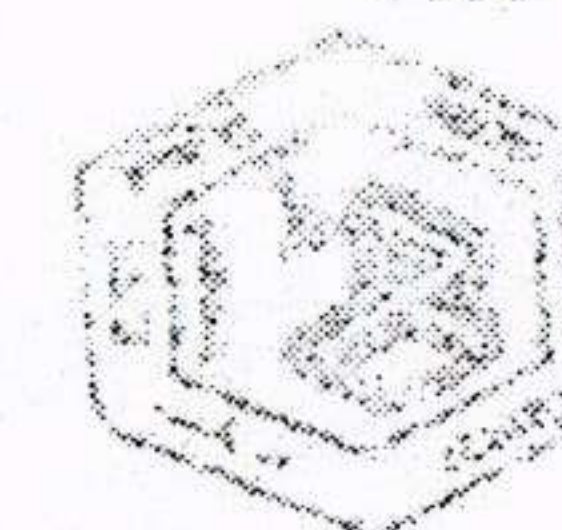



C13CPD32 DMSO D:\\ abari 44

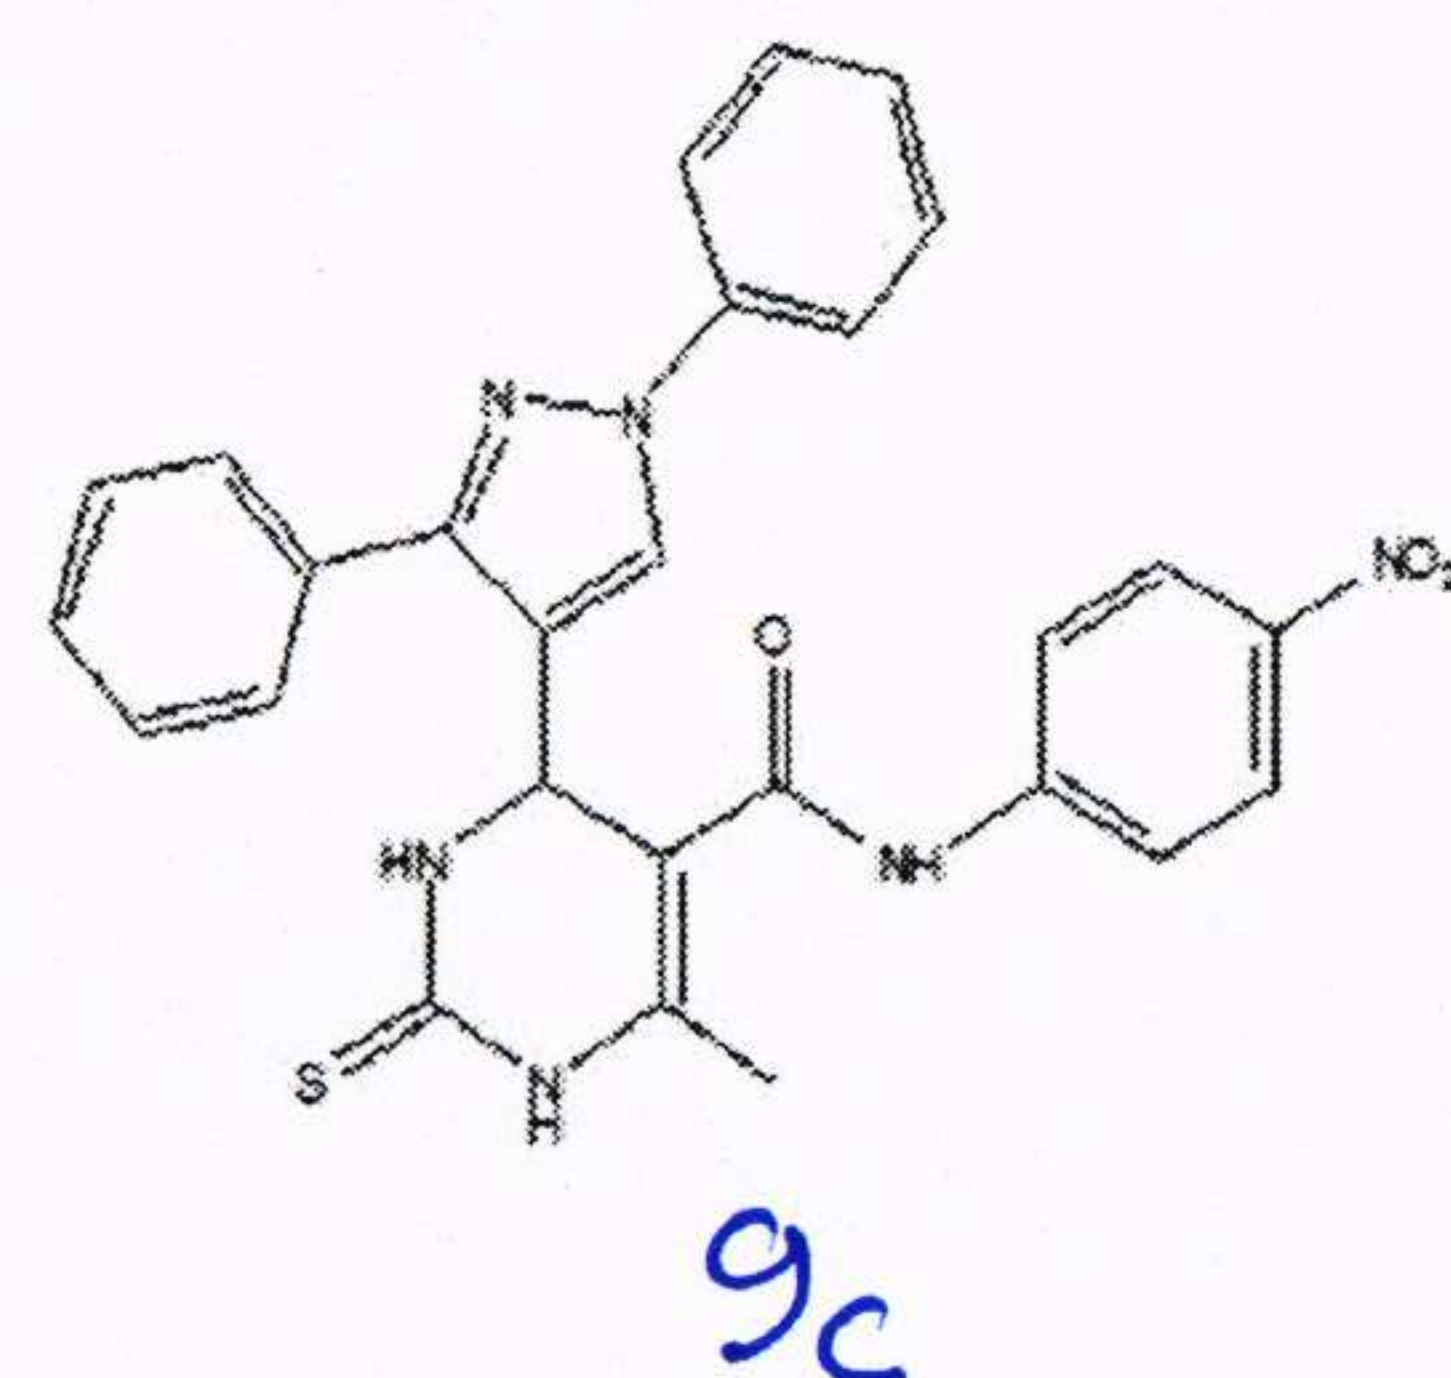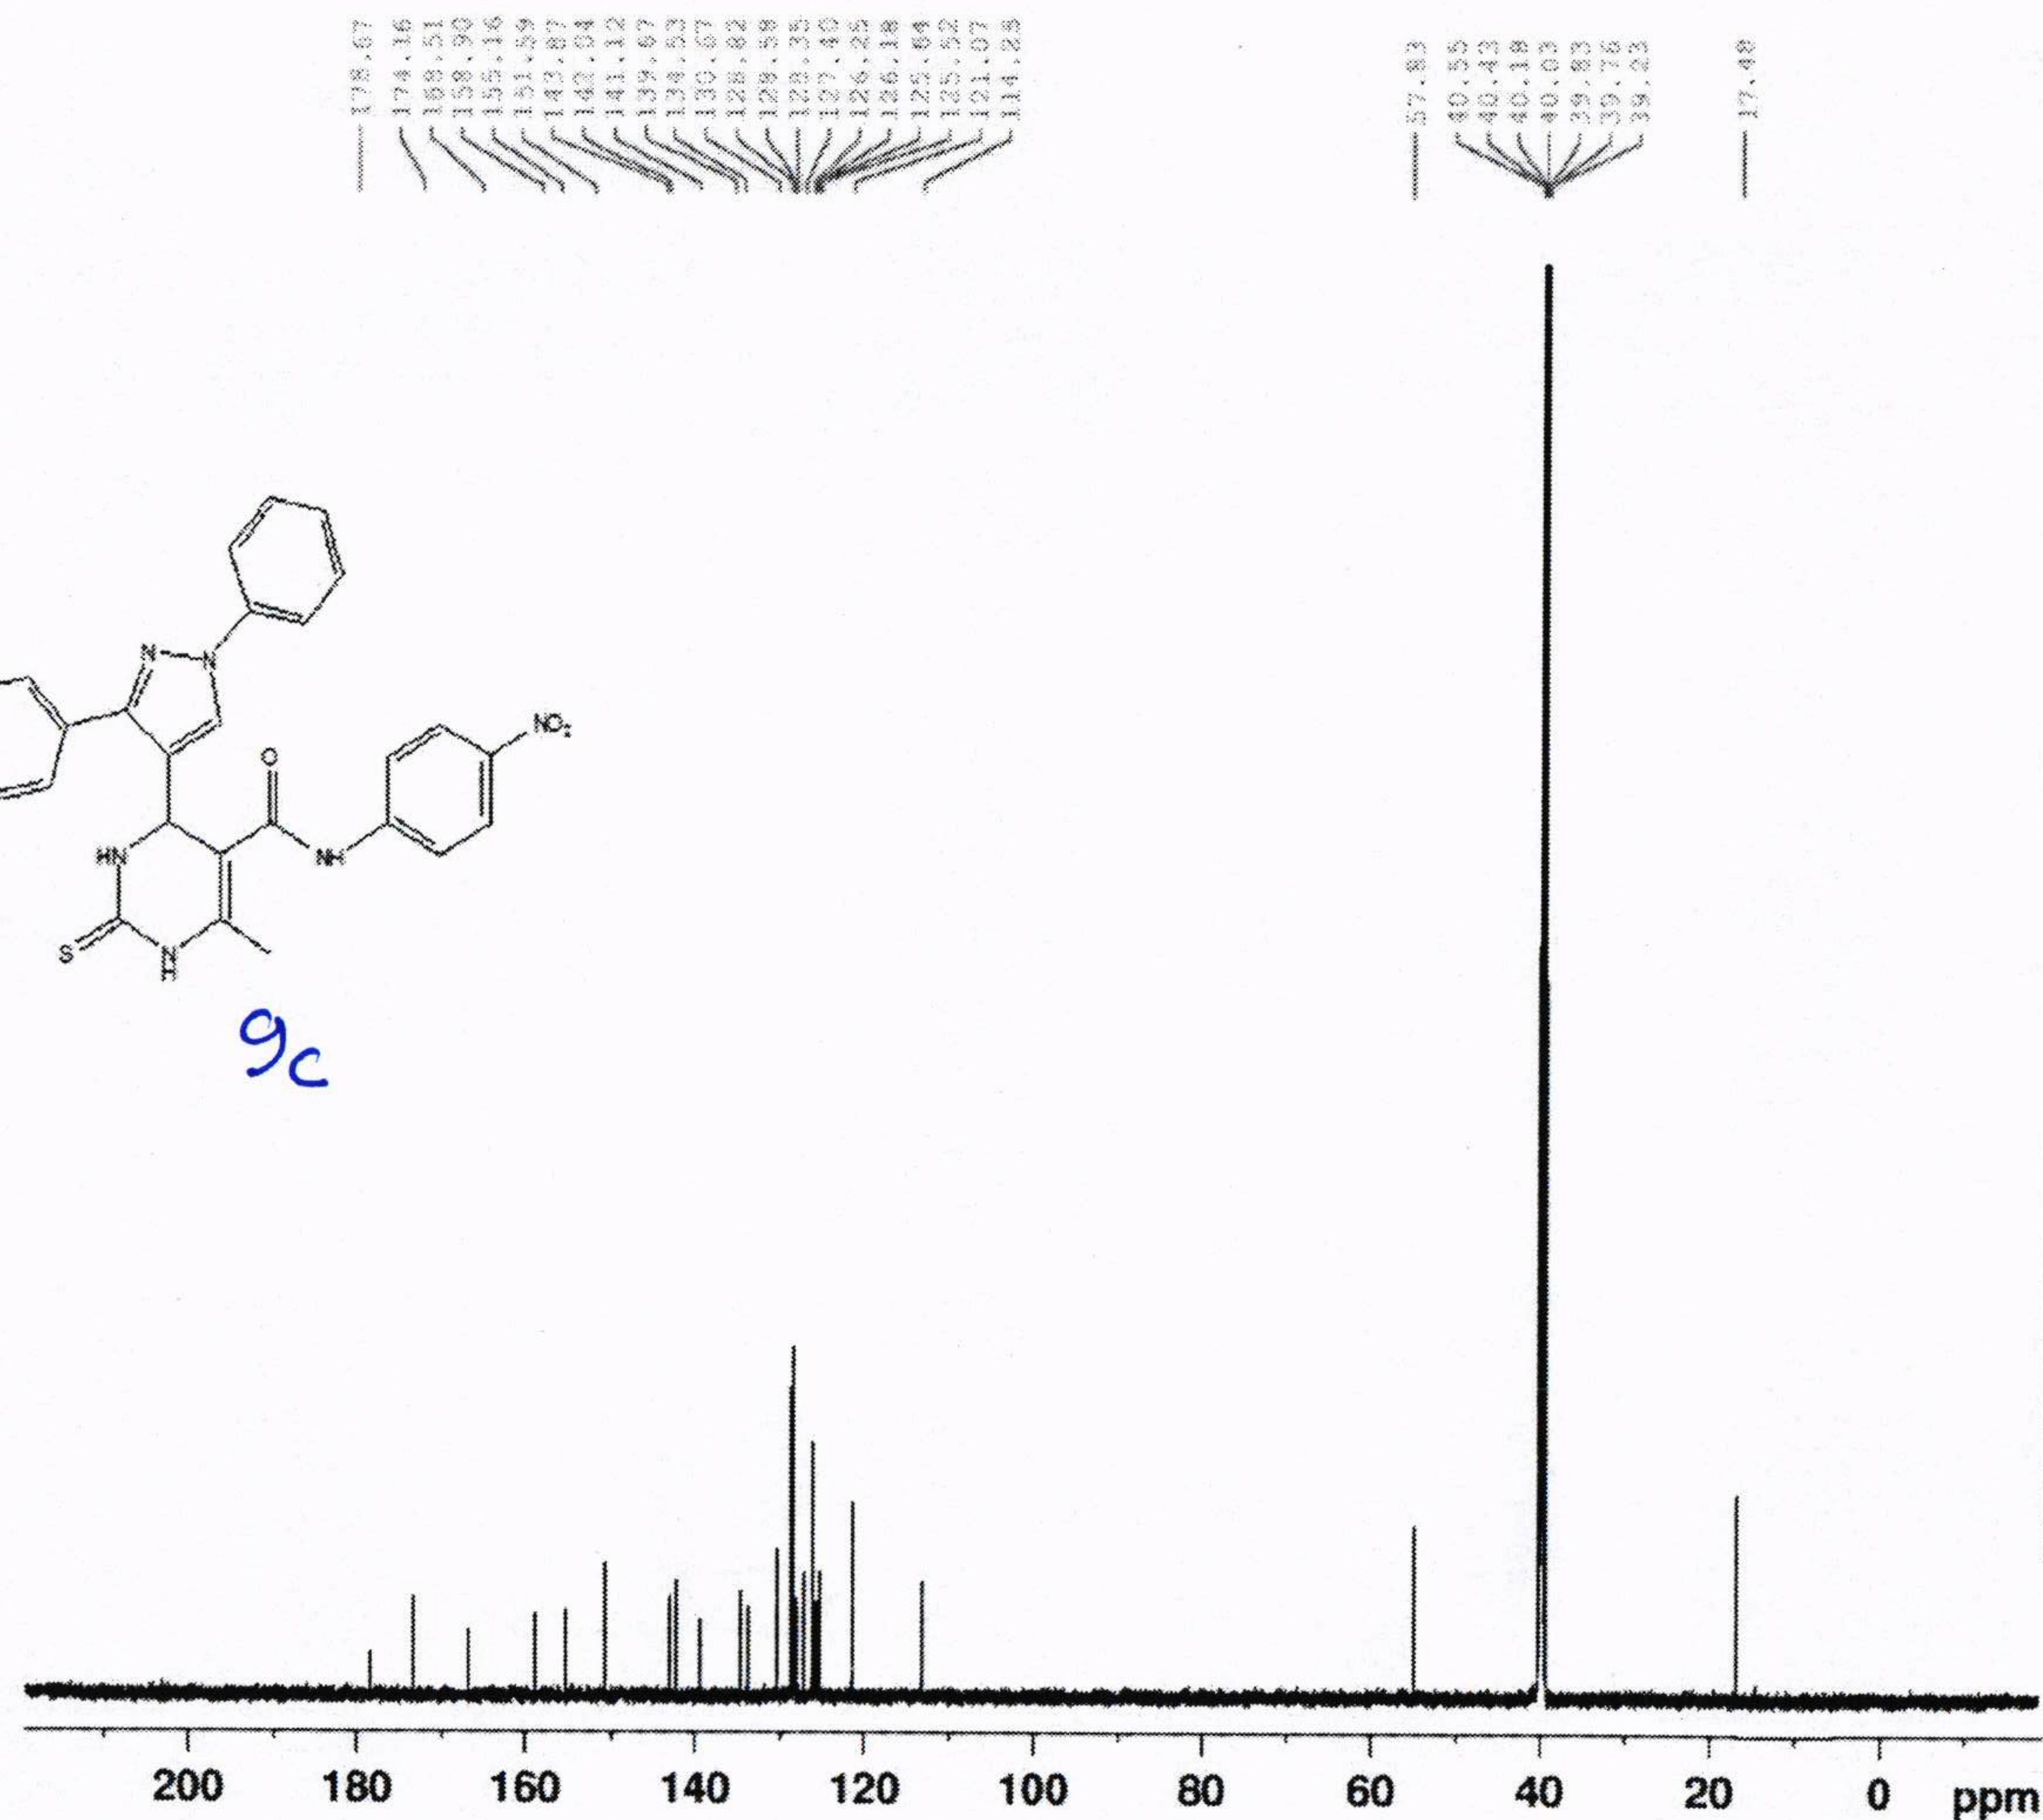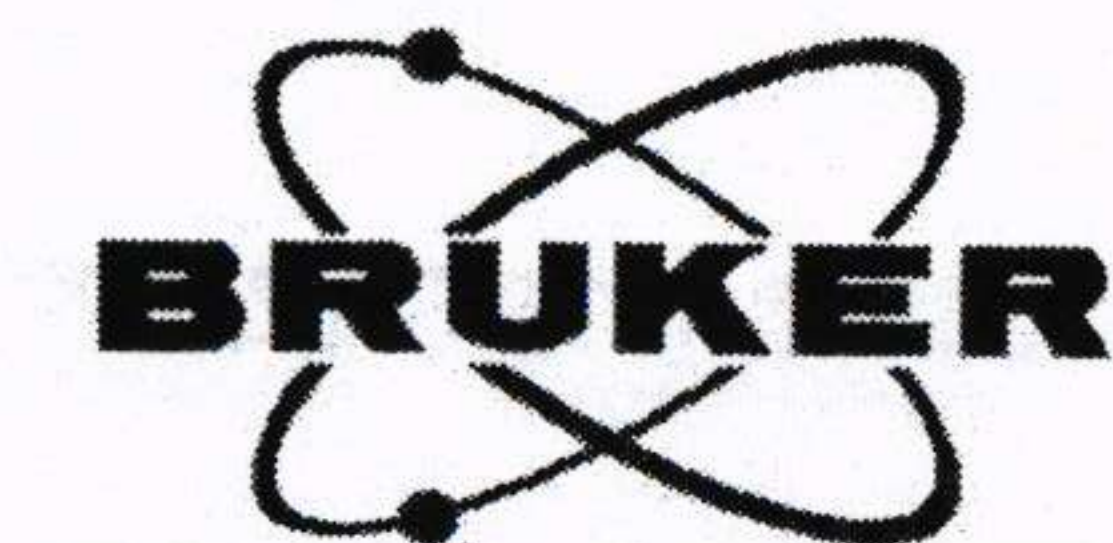

NAME drshahat-18  
 EXPNO 11  
 PROCNO 1  
 Date\_ 20210622  
 Time 12.07  
 INSTRUM spect  
 PROBHD 5 mm PABBO BB-  
 PULPROG zgpg30  
 TD 65536  
 SOLVENT DMSO  
 NS 1165  
 DS 2  
 SWH 30030.029 Hz  
 FIDRES 0.458222 Hz  
 AQ 1.0912410 sec  
 RG 4597.6  
 DW 16.650 usec  
 DE 6.50 usec  
 TE 299.2 K  
 D1 2.00000000 sec  
 D11 0.03000000 sec  
 TD0 1

===== CHANNEL f1 =====  
 NUC1 13C  
 P1 20.00 usec  
 PL1 -6.00 dB  
 SFO1 125.7703643 MHz

===== CHANNEL f2 =====  
 CPDPRG2 waltz16  
 NUC2 1H  
 PCPD2 80.00 usec  
 PL2 -1.10 dB  
 PL12 13.44 dB  
 PL13 16.40 dB  
 SFO2 500.1320005 MHz  
 SI 32768  
 SF 125.7577890 MHz  
 WDW EM  
 SSB 0  
 LB 1.00 Hz  
 GB 0  
 PC 1.40

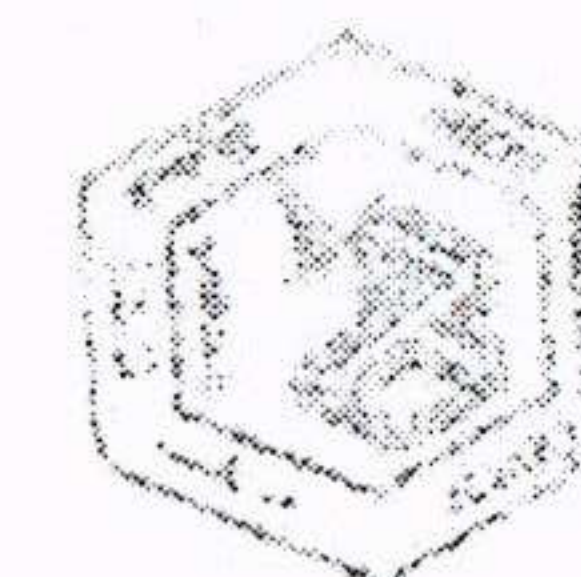

Supplement: s1 [file s1]
